# Supplementary material for: Reductive cleavage of annulated 5,6-dihydro-2H-1,2,4-thiadiazine-1,1-dioxides: medium sized ring azasultams
Source: Royal Society of Chemistry journal article supplement (doi:10.1039/d3cc02849f), 2023-01-01
Supplement: d3cc02849f1.pdf [file d3cc02849f1.pdf]

TABLE OF CONTENT

1. Experimental part and X-ray experimental part

pages S1-S22

2. Copies of NMR

pages S23-S134

| Compound # | Description         | Page |
|------------|---------------------|------|------------|---------------------|------|------------|---------------------|------|------------|---------------------|------|
| <b>7a</b>  | <sup>1</sup> H NMR  | 23   | <b>7g</b>  | <sup>13</sup> C NMR | 41   | <b>8f</b>  | <sup>13</sup> C NMR | 59   | <b>11a</b> | <sup>13</sup> C NMR | 77   |
|            | <sup>13</sup> C NMR | 24   |            | APT                 | 42   |            | APT                 | 60   |            | APT                 | 78   |
|            | APT                 | 25   | <b>8a</b>  | <sup>1</sup> H NMR  | 43   | <b>8g</b>  | <sup>1</sup> H NMR  | 61   | <b>11b</b> | <sup>1</sup> H NMR  | 79   |
| <b>7b</b>  | <sup>1</sup> H NMR  | 26   |            | <sup>13</sup> C NMR | 44   |            | <sup>13</sup> C NMR | 62   |            | <sup>13</sup> C NMR | 80   |
|            | <sup>13</sup> C NMR | 27   |            | APT                 | 45   |            | APT                 | 63   |            | APT                 | 81   |
| <b>7c</b>  | <sup>1</sup> H NMR  | 28   | <b>8b</b>  | <sup>1</sup> H NMR  | 46   | <b>9a</b>  | <sup>1</sup> H NMR  | 64   | <b>11c</b> | <sup>1</sup> H NMR  | 82   |
|            | <sup>13</sup> C NMR | 29   |            | <sup>13</sup> C NMR | 47   |            | <sup>13</sup> C NMR | 65   |            | <sup>13</sup> C NMR | 83   |
|            | APT                 | 30   |            | APT                 | 48   |            | APT                 | 66   |            | APT                 | 84   |
| <b>7d</b>  | <sup>1</sup> H NMR  | 31   | <b>8c</b>  | <sup>1</sup> H NMR  | 49   | <b>9c</b>  | <sup>1</sup> H NMR  | 67   | <b>11d</b> | <sup>1</sup> H NMR  | 85   |
|            | <sup>13</sup> C NMR | 32   |            | <sup>13</sup> C NMR | 50   |            | <sup>13</sup> C NMR | 68   |            | <sup>13</sup> C NMR | 86   |
|            | APT                 | 33   |            | APT                 | 51   |            | APT                 | 69   |            | APT                 | 87   |
| <b>7e</b>  | <sup>1</sup> H NMR  | 34   | <b>8d</b>  | <sup>1</sup> H NMR  | 52   | <b>9d</b>  | <sup>1</sup> H NMR  | 70   | <b>11e</b> | <sup>1</sup> H NMR  | 88   |
|            | <sup>13</sup> C NMR | 35   |            | <sup>13</sup> C NMR | 53   |            | <sup>13</sup> C NMR | 71   |            | <sup>13</sup> C NMR | 89   |
|            | APT                 | 36   |            | APT                 | 54   |            | APT                 | 72   |            | APT                 | 90   |
| <b>7f</b>  | <sup>1</sup> H NMR  | 37   | <b>8e</b>  | <sup>1</sup> H NMR  | 55   | <b>9f</b>  | <sup>1</sup> H NMR  | 73   | <b>11f</b> | <sup>1</sup> H NMR  | 91   |
|            | <sup>13</sup> C NMR | 38   |            | <sup>13</sup> C NMR | 56   |            | <sup>13</sup> C NMR | 74   |            | <sup>13</sup> C NMR | 92   |
|            | APT                 | 39   |            | APT                 | 57   |            | APT                 | 75   |            | APT                 | 93   |
| <b>7g</b>  | <sup>1</sup> H NMR  | 40   | <b>8f</b>  | <sup>1</sup> H NMR  | 55   | <b>11a</b> | <sup>1</sup> H NMR  | 76   | <b>11g</b> | <sup>1</sup> H NMR  | 94   |

| Compound # | Description         | Page |
|------------|---------------------|------|------------|---------------------|------|------------|---------------------|------|------------|---------------------|------|
| <b>11g</b> | <sup>13</sup> C NMR | 95   | <b>12c</b> | <sup>1</sup> H NMR  | 105  | <b>13c</b> | <sup>13</sup> C NMR | 115  | <b>14c</b> | APT                 | 125  |
|            | APT                 | 96   |            | <sup>13</sup> C NMR | 106  |            | APT                 | 116  | <b>14d</b> | <sup>1</sup> H NMR  | 126  |
| <b>11h</b> | <sup>1</sup> H NMR  | 97   |            | APT                 | 107  | <b>14a</b> | <sup>1</sup> H NMR  | 117  |            | <sup>13</sup> C NMR | 127  |
|            | <sup>13</sup> C NMR | 98   | <b>13a</b> | <sup>1</sup> H NMR  | 108  |            | <sup>13</sup> C NMR | 118  |            | APT                 | 128  |
|            | APT                 | 99   |            | <sup>13</sup> C NMR | 109  |            | APT                 | 119  | <b>14e</b> | <sup>1</sup> H NMR  | 129  |
| <b>12a</b> | <sup>1</sup> H NMR  | 100  |            | APT                 | 110  | <b>14b</b> | <sup>1</sup> H NMR  | 120  |            | <sup>13</sup> C NMR | 130  |
|            | <sup>13</sup> C NMR | 101  | <b>13b</b> | <sup>1</sup> H NMR  | 111  |            | <sup>13</sup> C NMR | 121  |            | APT                 | 131  |
|            | APT                 | 102  |            | <sup>13</sup> C NMR | 112  |            | APT                 | 122  | <b>15</b>  | <sup>1</sup> H NMR  | 132  |
| <b>12b</b> | <sup>1</sup> H NMR  | 103  |            | APT                 | 113  | <b>14c</b> | <sup>1</sup> H NMR  | 123  |            | <sup>13</sup> C NMR | 133  |
|            | <sup>13</sup> C NMR | 104  | <b>13c</b> | <sup>1</sup> H NMR  | 114  |            | <sup>13</sup> C NMR | 124  |            | APT                 | 134  |

## Experimental part

Solvents were purified and dried by standard methods. Melting points were determined with an electrothermal capillary melting point apparatus.  $^1\text{H}$  NMR spectra were recorded with Agilent ProPulse 600 spectrometer (at 600 MHz for  $^1\text{H}$  NMR, 151 MHz for  $^{13}\text{C}$  NMR), Bruker 170 Avance 500 spectrometer (at 500 MHz for  $^1\text{H}$  NMR, 126 MHz for  $^{13}\text{C}$  NMR) and Varian Unity Plus 400 spectrometer (at 400 MHz for  $^1\text{H}$  NMR, 101 MHz for  $^{13}\text{C}$  NMR). Chemical shifts are reported in ppm relative to internal tetramethylsilane (TMS; for  $^1\text{H}$  and  $^{13}\text{C}$ ). HRMS were recorded with Agilent 6224 TOF LC/MS.

### General procedure for the synthesis of cyclic amidines **7**

To a stirred solution of cyclic imidate **6a** (99.1 g, 1 mol, 1.1 eq.) in methanol (1 L) was added taurine (112.6 g, 0.9 mol, 1 eq.) and the resulting suspension was refluxed for two days. The reaction mixture was allowed cooling to room temperature and volatiles were removed under reduced pressure. The residue was triturated with MTBE (500 mL), filtered off, washed with MTBE (3×400 mL) and dried under reduced pressure to give amidine **7a** that was used in the next step without further purification.

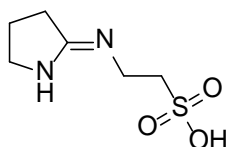

### 2-(pyrrolidin-2-ylideneamino)ethanesulfonic acid **7a**

M.p. 271-273°C, a white powder, 173.0 g (purity 90%, yield 92.3%)

$^1\text{H}$  NMR (400 MHz,  $\text{D}_2\text{O}$ )  $\delta$  3.73-3.68 (m, 4H), 3.20 (t,  $J=6.8$  Hz, 2H), 2.87 (t,  $J=8.0$  Hz, 2H), 2.26-2.16 (m, 2H).  $^{13}\text{C}$  NMR (150 MHz,  $\text{D}_2\text{O}$ )  $\delta$  169.1 (C), 48.4 ( $\text{CH}_2$ ), 47.7 ( $\text{CH}_2$ ), 39.1 ( $\text{CH}_2$ ), 30.6 ( $\text{CH}_2$ ), 20.2 ( $\text{CH}_2$ ). HRMS (ESI/TOF-Q)  $m/z$ :  $[\text{M}]^+$  calcd for  $\text{C}_6\text{H}_{12}\text{N}_2\text{O}_3\text{S}$ , 192.0569; found 192.0565.

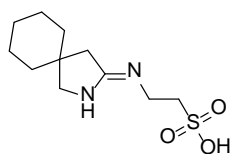

### 2-(2-azaspiro[4.5]decan-3-ylideneamino)ethanesulfonic acid 7b

M.p. 257-259°C, a white powder, 23.7g (yield 87.1%).

$^1\text{H}$  NMR (400 MHz,  $\text{CF}_3\text{COOD}$ )  $\delta$  8.29-7.76 (m, 2H), 4.22-4.18 (m, 2H), 3.87-3.77 (m, 4H), 3.08-3.03 (m, 2H), 1.84-1.75 (m, 10H).  $^{13}\text{C}$  NMR (126 MHz,  $\text{CF}_3\text{COOD}$ )  $\delta$  168.8, 57.8, 49.7, 48.8, 42.1, 40.5, 38.5, 35.3, 34.8, 24.1, 21.8. HRMS (ESI/TOF-Q) m/z:  $[\text{M}]^+$  calcd for  $\text{C}_{11}\text{H}_{20}\text{N}_2\text{O}_3\text{S}$ , 260.1195; found 260.1191.

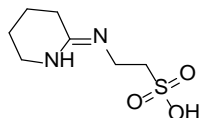

### 2-(piperidin-2-ylideneamino)ethanesulfonic acid 7c

M.p. 255-257°C, a white powder, 112.67 g (yield 94.1%)

$^1\text{H}$  NMR (400 MHz,  $\text{D}_2\text{O}$ )  $\delta$  3.62 (br.s, 2H), 3.42 (br.s, 2H), 3.18 (br.s, 2H), 2.59 (br.s, 2H), 1.81 (br.s, 4H).  $^{13}\text{C}$  NMR (150 MHz,  $\text{D}_2\text{O}$ )  $\delta$  163.6 (C), 48.2 ( $\text{CH}_2$ ), 41.5 ( $\text{CH}_2$ ), 36.9 ( $\text{CH}_2$ ), 26.1 ( $\text{CH}_2$ ), 20.3 ( $\text{CH}_2$ ), 17.5 ( $\text{CH}_2$ ). HRMS (ESI/TOF-Q) m/z:  $[\text{M}]^+$  calcd for  $\text{C}_7\text{H}_{14}\text{N}_2\text{O}_3\text{S}$ , 206.0725; found 206.0723.

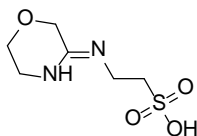

### 2-(morpholin-3-ylideneamino)ethanesulfonic acid 7d

M.p. 273-275°C, a white powder, 94.23 g (yield 87.6%)

$^1\text{H}$  NMR (400 MHz,  $\text{D}_2\text{O}$ )  $\delta$  4.59 (s, 2H), 4.04 (t,  $J=5.2$  Hz, 2H), 3.71 (t,  $J=6.4$  Hz, 2H), 3.57 (t,  $J=5.2$  Hz, 2H), 3.24 (t,  $J=6.4$  Hz, 2H).  $^{13}\text{C}$  NMR (100 MHz,  $\text{D}_2\text{O}$ )  $\delta$

160.4 (C), 63.1 (CH<sub>2</sub>), 63.0 (CH<sub>2</sub>), 48.1 (CH<sub>2</sub>), 39.6 (CH<sub>2</sub>), 37.2 (CH<sub>2</sub>). HRMS (ESI/TOF-Q) m/z: [M]<sup>+</sup> calcd for C<sub>6</sub>H<sub>12</sub>N<sub>2</sub>O<sub>4</sub>S, 208.0518; found 208.0507.

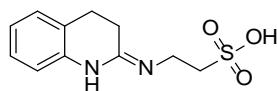

**2-((3,4-dihydroquinolin-2(1H)-ylidene)amino)ethanesulfonic acid 7e**

M.p. 325-327°C, a white powder, 112.7 g (yield 93.7%)

<sup>1</sup>H NMR (400 MHz, CF<sub>3</sub>COOD) δ 9.78-9.64 (m, 1H), 8.64-8.43 (m, 1H), 7.55-7.42 (m, 4H), 4.46-4.42 (m, 2H), 3.99-3.94 (m, 2H), 3.32-3.21 (m, 4H). <sup>13</sup>C NMR (126 MHz, CF<sub>3</sub>COOD) δ 162.7 (C), 131.9 (C), 127.9 (CH), 127.7 (CH), 126.7 (CH), 123.5 (C), 117.2 (CH), 48.5 (CH<sub>2</sub>), 37.5 (CH<sub>2</sub>), 26.7 (CH<sub>2</sub>), 21.5 (CH<sub>2</sub>). HRMS (ESI/TOF-Q) m/z: [M]<sup>+</sup> calcd for C<sub>11</sub>H<sub>14</sub>N<sub>2</sub>O<sub>3</sub>S, 254.0725; found 254.0719.

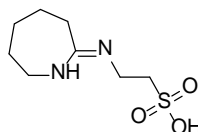

**2-(azepan-2-ylideneamino)ethanesulfonic acid 7f**

M.p. 271-274°C, a white powder, 107.6 g (yield 95.3%)

<sup>1</sup>H NMR (400 MHz, D<sub>2</sub>O) δ 3.63 (t, *J* = 6.4 Hz, 2H), 3.51-3.49 (m, 2H), 3.20 (t, *J* = 6.8 Hz, 2H), 2.69-2.67 (m, 2H), 1.79-1.66 (m, 6H). <sup>13</sup>C NMR (125 MHz, D<sub>2</sub>O) δ 169.2 (C), 47.6 (CH<sub>2</sub>), 43.7 (CH<sub>2</sub>), 37.1 (CH<sub>2</sub>), 31.8 (CH<sub>2</sub>), 28.5 (CH<sub>2</sub>), 26.9 (CH<sub>2</sub>), 22.5 (CH<sub>2</sub>). HRMS (ESI/TOF-Q) m/z: [M]<sup>+</sup> calcd for C<sub>8</sub>H<sub>16</sub>N<sub>2</sub>O<sub>3</sub>S, 220.0882; found 220.0874.

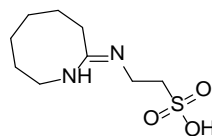

**2-(azocan-2-ylideneamino)ethanesulfonic acid 7g**

M.p. 286-289°C, a grey powder, 112.1 g (yield 93.9%)

$^1\text{H}$  NMR (500 MHz,  $\text{D}_2\text{O}$ )  $\delta$  3.68 (t,  $J=6.50$  Hz, 2H), 3.59 (t,  $J=5.5$  Hz, 2H), 3.21 (t,  $J=6.5$  Hz, 2H), 2.67 (t,  $J=6.0$  Hz, 2H), 1.86-1.82 (m, 2H), 1.75-1.70 (m, 2H), 1.61-1.52 (m, 4H)  $^{13}\text{C}$  NMR (125 MHz,  $\text{D}_2\text{O}$ )  $\delta$  167.7 (C), 47.6 ( $\text{CH}_2$ ), 42.0 ( $\text{CH}_2$ ), 36.9 ( $\text{CH}_2$ ), 30.0 ( $\text{CH}_2$ ), 28.3 ( $\text{CH}_2$ ), 28.1 ( $\text{CH}_2$ ), 24.1 ( $\text{CH}_2$ ), 23.3 ( $\text{CH}_2$ ). HRMS (ESI/TOF-Q)  $m/z$ :  $[\text{M}]^+$  calcd for  $\text{C}_9\text{H}_{18}\text{N}_2\text{O}_3\text{S}$ , 234.1038; found 234.1028.

### General procedure for the synthesis of thiadiazine derivatives **8**

Sulfonic acid **7a** (125.0 g, 0.65 mol, 1 eq.) was dissolved in  $\text{POCl}_3$  (400 mL), then  $\text{PCl}_5$  (135.4 g, 0.65 mol, 1 eq.) was added at  $20^\circ\text{C}$ . The resulting white suspension was stirred for 24 hours at  $35^\circ\text{C}$ . Upon completion,  $\text{POCl}_3$  was removed under reduced pressure at the same temperature. The residue was triturated with MTBE (500 mL), filtered off and washed with MTBE ( $5 \times 400$  mL) to afford a crude sulfonyl chloride that was used in the next step without further purification. To a stirred suspension of the crude sulfonyl chloride (0.65 mol, 1 eq.) in dry  $\text{CH}_3\text{CN}$  (1000 mL) was added in one portion DIPEA (180.6 g, 1.4 mol, 2.15 eq.) and the reaction mixture was stirred for 12 hours at room temperature ( $25^\circ\text{C}$ ). All volatiles were removed under reduced pressure leaving semi-oil residue. It was diluted with DCM (1 L),  $\text{K}_2\text{CO}_3$  (269.5 g, 1.95 mol, 3 eq.) and water (25 mL) were added. The reaction mixture was stirred for 2 hours at room temperature. Upon completion, inorganics were filtered off, and was washed with DCM ( $4 \times 500$  mL). Organic washings were combined and concentrated under reduced pressure (after evaporation of DCM at 10 Torr / $30^\circ\text{C}$ , excess of DIPEA was removed at 10 Torr / $70^\circ\text{C}$ ) to give pure annulated thiadiazine **8a**.

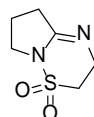

### 3,6,7,8-tetrahydro-2H-pyrrolo[1,2-b][1,2,4]thiadiazine 4,4-dioxide **8a**

M.p.  $58-60^\circ\text{C}$ , a beige powder, 94.6 g (yield 83.5%)

$^1\text{H}$  NMR (400 MHz, DMSO- $d_6$ )  $\delta$  3.84-3.81 (m, 2H), 3.63 (t,  $J=6.8$  Hz, 2H), 3.33 (t,  $J=6.0$  Hz, 2H), 2.54-2.5 (m, 2H), 1.95-1.88 (m, 2H).  $^{13}\text{C}$  NMR (126 MHz, DMSO- $d_6$ )  $\delta$  156.6 (C), 46.0 ( $\text{CH}_2$ ), 44.7 ( $\text{CH}_2$ ), 44.2 ( $\text{CH}_2$ ), 31.2 ( $\text{CH}_2$ ), 18.9 ( $\text{CH}_2$ ). HRMS (ESI/TOF-Q)  $m/z$ :  $[\text{M}]^+$  calcd for  $\text{C}_6\text{H}_{10}\text{N}_2\text{O}_2\text{S}$ , 174.0463; found 174.0459.

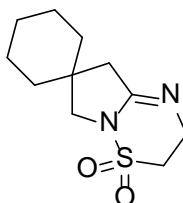

**2',3',6',8'-tetrahydrospiro[cyclohexane-1,7'-pyrrolo[1,2-b][1,2,4]thiadiazine] 4',4'-dioxide 8b**

M.p. 98-103°C, a white solid 15.1 g (yield 91.1%).

$^1\text{H}$  NMR (400 MHz, DMSO- $d_6$ )  $\delta$  3.82 (t,  $J=5.60$  Hz, 2H), 3.41 (s, 2H), 3.35 (t,  $J=6.00$  Hz, 2H), 2.39 (s, 2H), 1.44-1.36 (m, 10H).  $^{13}\text{C}$  NMR (100 MHz, DMSO- $d_6$ )  $\delta$  156.5 (C), 54.0 ( $\text{CH}_2$ ), 46.4 ( $\text{CH}_2$ ), 45.3 ( $\text{CH}_2$ ), 43.5 (C), 37.8 ( $\text{CH}_2$ ), 34.8 ( $\text{CH}_2$ ), 25.8 ( $\text{CH}_2$ ), 22.9 ( $\text{CH}_2$ ). HRMS (ESI/TOF-Q)  $m/z$ :  $[\text{M}]^+$  calcd for  $\text{C}_{11}\text{H}_{18}\text{N}_2\text{O}_2\text{S}$ , 242.1089; found 242.1084.

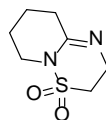

**2,3,6,7,8,9-hexahydropyrrolo[1,2-b][1,2,4]thiadiazine 4,4-dioxide 8c**

M.p. 68-70°C, a beige powder, 93.6 g (yield 93.4%)

$^1\text{H}$  NMR (400 MHz, DMSO- $d_6$ )  $\delta$  3.85-3.82 (m, 2H), 3.49-3.46 (m, 2H), 3.42-3.39 (m, 2H), 2.36-2.33 (m, 2H), 1.81-1.75 (m, 2H), 1.71-1.65 (m, 2H)  $^{13}\text{C}$  NMR (126 MHz, DMSO- $d_6$ )  $\delta$  151.7 (C), 44.9 ( $\text{CH}_2$ ), 44.3 ( $\text{CH}_2$ ), 42.4 ( $\text{CH}_2$ ), 32.9 ( $\text{CH}_2$ ), 23.0

(CH<sub>2</sub>), 20.9 (CH<sub>2</sub>). HRMS (ESI/TOF-Q) m/z: [M]<sup>+</sup> calcd for C<sub>7</sub>H<sub>12</sub>N<sub>2</sub>O<sub>2</sub>S, 188.0619; found 188.0616.

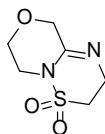

### 3,6,7,9-tetrahydro-2H-[1,4]oxazino[4,3-b][1,2,4]thiadiazine 4,4-dioxide 8d

M.p. 91°C, a white crystal, 97.1 g (yield 91.2%)

<sup>1</sup>H NMR (400 MHz, DMSO-*d*<sub>6</sub>) δ 4.12 (s, 2H), 3.92-3.86 (m, 4H), 3.56-3.49 (m, 4H). <sup>13</sup>C NMR (150 MHz, DMSO-*d*<sub>6</sub>) δ 147.8 (C), 68.4 (CH<sub>2</sub>), 64.9 (CH<sub>2</sub>), 45.4 (CH<sub>2</sub>), 45.0 (CH<sub>2</sub>), 40.8 (CH<sub>2</sub>). HRMS (ESI/TOF-Q) m/z: [M]<sup>+</sup> calcd for C<sub>6</sub>H<sub>10</sub>N<sub>2</sub>O<sub>3</sub>S, 190.0412; found 190.0404.

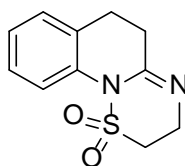

### 2,3,5,6-tetrahydro-[1,2,4]thiadiazino[2,3-a]quinoline 1,1-dioxide 8e

M.p. 126-128°C, yellow solid, 89.3 g (yield 79.1%).

<sup>1</sup>H NMR (400 MHz, DMSO-*d*<sub>6</sub>) δ 7.54 (d, *J* = 4.20 Hz, 1H), 7.29-7.25 (m, 2H), 7.16-7.12 (m, 1H), 3.96-3.93 (m, 2H), 3.77 (t, *J* = 6.00 Hz, 2H), 2.81-2.78 (m, 2H), 2.60-2.57 (m, 2H). <sup>13</sup>C NMR (126 MHz, DMSO-*d*<sub>6</sub>) δ 151.1 (C), 132.7 (C), 130.3 (C), 128.2 (CH), 126.6 (CH), 124.9 (CH), 120.3 (CH), 47.2 (CH<sub>2</sub>), 43.2 (CH<sub>2</sub>), 33.2 (CH<sub>2</sub>), 25.0 (CH<sub>2</sub>). HRMS (ESI/TOF-Q) m/z: [M]<sup>+</sup> calcd for C<sub>11</sub>H<sub>12</sub>N<sub>2</sub>O<sub>2</sub>S, 236.0619; found 236.0615.

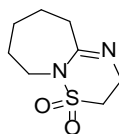

### 3,6,7,8,9,10-hexahydro-2H-[1,2,4]thiadiazino[2,3-a]azepine 4,4-dioxide 8f



M.p. 54-56°C, a beige powder, 101.8 g (yield 94.3%)

$^1\text{H}$  NMR (400 MHz, DMSO- $d_6$ )  $\delta$  3.81 (t,  $J$  = 6.0 Hz, 2H), 3.71-3.69 (m, 2H), 3.39 (t,  $J$  = 6.4 Hz, 2H), 2.52-2.50 (m, 2H), 1.60 (br.s, 6H).  $^{13}\text{C}$  NMR (126 MHz, DMSO- $d_6$ )  $\delta$  156.5 (C), 45.4 (CH<sub>2</sub>), 44.9 (CH<sub>2</sub>), 41.8 (CH<sub>2</sub>), 37.3 (CH<sub>2</sub>), 29.9 (CH<sub>2</sub>), 28.6 (CH<sub>2</sub>), 25.5 (CH<sub>2</sub>). HRMS (ESI/TOF-Q)  $m/z$ : [M]<sup>+</sup> calcd for C<sub>8</sub>H<sub>14</sub>N<sub>2</sub>O<sub>2</sub>S, 202.0776; found 202.0772.

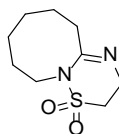

### **2,3,6,7,8,9,10,11-octahydro-[1,2,4]thiadiazino[2,3-a]azocine 4,4-dioxide 8g**

M.p. 77-79°C, a brown oil, 87.7 g (yield 82.3%)

$^1\text{H}$  NMR (500 MHz, DMSO- $d_6$ )  $\delta$  3.87-3.81 (m, 4H), 3.37 (t,  $J$  = 7.5 Hz, 2H), 2.50-2.47 (m, 2H), 1.68-1.58 (m, 4H), 1.55-1.46 (m, 4H).  $^{13}\text{C}$  NMR (126 MHz, DMSO- $d_6$ )  $\delta$  155.4 (C), 45.3 (CH<sub>2</sub>), 45.1 (CH<sub>2</sub>), 42.0 (CH<sub>2</sub>), 34.1 (CH<sub>2</sub>), 30.6 (CH<sub>2</sub>), 29.8 (CH<sub>2</sub>), 25.1 (CH<sub>2</sub>), 23.8 (CH<sub>2</sub>). HRMS (ESI/TOF-Q)  $m/z$ : [M]<sup>+</sup> calcd for C<sub>9</sub>H<sub>16</sub>N<sub>2</sub>O<sub>2</sub>S, 216.0932; found 216.0929.

### **General procedure for reductive cleavage of thiadiazine derivatives**

To a stirred solution of thiadiazine derivative **8a** (34.8 g, 200 mmol, 1 eq.) in glacial acetic acid (150 mL) was added portion wise NaBH<sub>3</sub>CN (25.1 g, 400 mmol, 2 eq.) for 0.5 h keeping temperature below 30°C. The reaction mixture was stirred for 1h at 25°C-30°C, 1 h at 50°C, 21 h at 25°C. The reaction mixture was diluted with water (75 mL) and was cooled to 15°C. It was quenched with 50% aqueous NaOH till pH = 14 at 20°C. A precipitated solid was filtered off and washed with CHCl<sub>3</sub> (5×150 mL). The filtrate was extracted with CHCl<sub>3</sub> (4×200 mL), the combined organics were dried over Na<sub>2</sub>SO<sub>4</sub> and evaporated under reduced pressure till dryness to afford a crude product **11a** that was purified by trituration with MTBE.

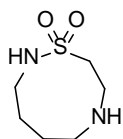

### 1,2,7-thiadiazonane 1,1-dioxide 11a

M.p. 61°C, a white powder, 22.5 g (yield 63.1%)

$^1\text{H}$  NMR (400 MHz, DMSO- $d_6$ )  $\delta$  6.74 (br.s, 1H), 3.33-3.13 (m, 5H), 2.94-2.92 (m, 2H), 2.68-2.67 (m, 2H), 1.62-1.54 (m, 4H).  $^{13}\text{C}$  NMR (100 MHz, DMSO- $d_6$ )  $\delta$  52.9 (CH<sub>2</sub>), 49.5 (CH<sub>2</sub>), 45.0 (CH<sub>2</sub>), 43.4 (CH<sub>2</sub>), 28.7 (CH<sub>2</sub>), 28.6 (CH<sub>2</sub>). HRMS (ESI/TOF-Q) m/z: [M]<sup>+</sup> calcd for C<sub>6</sub>H<sub>14</sub>N<sub>2</sub>O<sub>2</sub>S, 178.0776; found 178.0772.

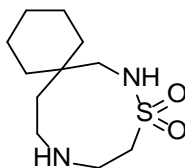

### 9-thia-8,12-diazaspiro[5.8]tetradecane 9,9-dioxide 11b

M.p. 129-133°C, a white solid, 3.3 g (yield 89.7%).

$^1\text{H}$  NMR (500 MHz, DMSO- $d_6$ )  $\delta$  6.94 (br.s, 1H), 3.32 (br.s, 2H), 3.27 (br.s, 2H), 2.88 (br.s, 2H), 2.70 (br.s, 2H), 1.49-1.21 (m, 10H), 1.12-1.08 (m, 2H).  $^{13}\text{C}$  NMR (126 MHz, DMSO- $d_6$ )  $\delta$  54.6 (CH<sub>2</sub>), 51.3 (CH<sub>2</sub>), 44.9 (CH<sub>2</sub>), 44.6 (CH<sub>2</sub>), 36.3 (CH<sub>2</sub>), 33.9 (C), 33.0 (CH<sub>2</sub>), 25.9 (CH<sub>2</sub>), 21.0 (CH<sub>2</sub>). HRMS (ESI/TOF-Q) m/z: [M]<sup>+</sup> calcd for C<sub>11</sub>H<sub>22</sub>N<sub>2</sub>O<sub>2</sub>S, 246.1402; found 246.1395.

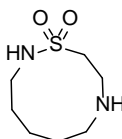

### 1,2,8-thiadiazecane 1,1-dioxide 11c

M.p. 98°C, a white powder, 14.3 g (yield 72.3%). Crude compound was purified by column chromatography (CHCl<sub>3</sub>/MeOH 90/10, SiO<sub>2</sub>) followed by triturating with MTBE (3×80 mL).

<sup>1</sup>H NMR (400 MHz, DMSO-*d*<sub>6</sub>) 6.74 (br.s, 1H), 3.18-3.15 (m, 2H), 3.09-3.08 (m, 2H), 2.95-2.92 (m, 2H), 2.59-2.57 (m, 2H), 2.27 (br.s, 1H), 1.58-1.43 (m, 6H). <sup>13</sup>C NMR (126 MHz, DMSO-*d*<sub>6</sub>) δ 47.9 (CH<sub>2</sub>), 44.7 (CH<sub>2</sub>), 43.3 (CH<sub>2</sub>), 41.8 (CH<sub>2</sub>), 26.9 (CH<sub>2</sub>), 25.6 (CH<sub>2</sub>), 20.4 (CH<sub>2</sub>). HRMS (ESI/TOF-Q) m/z: [M]<sup>+</sup> calcd for C<sub>7</sub>H<sub>16</sub>N<sub>2</sub>O<sub>2</sub>S, 192.0932; found 192.0924.

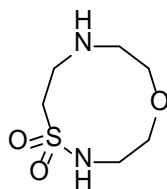

### 1,5,4,8-oxathiadiazecane 5,5-dioxide 11d

M.p. 79°C, a white powder, 6.4 g (yield 67.1%). Crude compound was purified by column chromatography (first eluent CHCl<sub>3</sub>/CH<sub>3</sub>CN, SiO<sub>2</sub>, second eluent MTBE/MeOH 70/30, Al<sub>2</sub>O<sub>3</sub>).

<sup>1</sup>H NMR (400 MHz, DMSO-*d*<sub>6</sub>) δ 7.02 (br.s, 1H), 3.52-3.48 (m, 4H), 3.26-3.23 (m, 2H), 3.15-3.12 (m, 2H), 3.01-2.97 (m, 2H), 2.75-2.72 (m, 2H). <sup>13</sup>C NMR (150 MHz, DMSO-*d*<sub>6</sub>) δ 71.2 (CH<sub>2</sub>), 68.6 (CH<sub>2</sub>), 51.1 (CH<sub>2</sub>), 47.4 (CH<sub>2</sub>), 44.3 (CH<sub>2</sub>), 43.6 (CH<sub>2</sub>). HRMS (ESI/TOF-Q) m/z: [M]<sup>+</sup> calcd for C<sub>6</sub>H<sub>14</sub>N<sub>2</sub>O<sub>3</sub>S, 194.0725; found 194.0726.

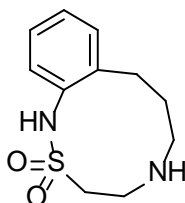

### 3,4,5,6,7,8-hexahydro-1H-benzo[c][1,2,8]thiadiazecine 2,2-dioxide 11e

M.p. 154-157°C, a yellow powder, 4.8 g (yield 92.7%).

$^1\text{H}$  NMR (400 MHz, DMSO- $d_6$ )  $\delta$  7.60 (d,  $J=3.80$  Hz, 1H), 7.19-7.15 (m, 2H), 7.04-7.01 (m, 1H), 3.36 (br.s, 1H), 3.09 (br.s, 2H), 2.99 (br.s, 2H), 2.69 (br.s, 2H), 2.19 (br.s, 2H), 1.69 (br.s, 2H).  $^{13}\text{C}$  NMR (100 MHz, DMSO- $d_6$ )  $\delta$  138.5 (C), 131.2 (CH), 130.8 (C), 127.5 (CH), 124.3 (CH), 118.6 (CH), 45.9 (CH $_2$ ), 43.5 (CH $_2$ ), 41.9 (CH $_2$ ), 30.0 (CH $_2$ ), 26.6 (CH $_2$ ). HRMS (ESI/TOF-Q)  $m/z$ :  $[\text{M}]^+$  calcd for C $_{11}$ H $_{16}$ N $_2$ O $_2$ S, 240.0932; found 240.0927.

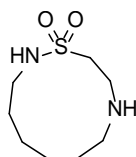

### 1-thia-2,9-diazacycloundecane 1,1-dioxide 11f

M.p. 61°C, a white powder, 19.3 g (yield 87.5%)

$^1\text{H}$  NMR (400 MHz, DMSO- $d_6$ )  $\delta$  6.66 (br.s, 1H), 3.13-3.07 (m, 4H), 2.93-2.91 (m, 2H), 2.60 (br.s, 2H), 2.00 (br.s, 1H), 1.43-1.41 (m, 8H).  $^{13}\text{C}$  NMR (126 MHz, DMSO- $d_6$ )  $\delta$  50.2 (CH $_2$ ), 46.7 (CH $_2$ ), 44.7 (CH $_2$ ), 41.6 (CH $_2$ ), 27.9 (CH $_2$ ), 27.4 (CH $_2$ ), 24.1 (CH $_2$ ), 22.9 (CH $_2$ ). HRMS (ESI/TOF-Q)  $m/z$ :  $[\text{M}]^+$  calcd for C $_8$ H $_{18}$ N $_2$ O $_2$ S, 206.1089; found 206.1079.

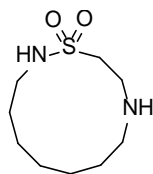

### 1-thia-2,10-diazacyclododecane 1,1-dioxide 11g

M.p. 68°C, a white powder, 27.1 g (yield 91.1%)

$^1\text{H}$  NMR (400 MHz, DMSO- $d_6$ )  $\delta$  6.93 (br.s, 1H), 3.09 (br.s, 2H), 2.98 (br.s, 2H), 2.86 (br.s, 2H), 2.53 (br.s, 2H), 1.99 (br.s, 1H), 1.51-1.37 (m, 10H).  $^{13}\text{C}$  NMR (150 MHz, DMSO- $d_6$ )  $\delta$  50.7 (CH $_2$ ), 46.4 (CH $_2$ ), 42.9 (CH $_2$ ), 40.1 (CH $_2$ ), 25.9 (CH $_2$ ), 25.0

(CH<sub>2</sub>), 24.3 (CH<sub>2</sub>), 23.5 (CH<sub>2</sub>), 23.4 (CH<sub>2</sub>). HRMS (ESI/TOF-Q) m/z: [M]<sup>+</sup> calcd for C<sub>9</sub>H<sub>20</sub>N<sub>2</sub>O<sub>2</sub>S, 220.1245; found 220.1240.

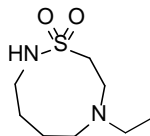

### 7-ethyl-1,2,7-thiadiazonane 1,1-dioxide 11h

Yellow oil, 13.2 g (yield 86.7%). The compound was prepared in a similar manner to that of **14a**.

<sup>1</sup>H NMR (400 MHz, DMSO-*d*<sub>6</sub>) δ 6.63 (br.s, 1H), 3.26-3.21 (m, 4H), 2.73 (t, *J* = 6.0 Hz, 2H), 2.54-2.50 (m, 4H), 1.62-1.58 (m, 4H), 0.99 (t, *J* = 7.2 Hz, 3H). <sup>13</sup>C NMR (100 MHz, DMSO-*d*<sub>6</sub>) δ 54.5 (CH<sub>2</sub>), 53.4 (CH<sub>2</sub>), 51.6 (CH<sub>2</sub>), 50.0 (CH<sub>2</sub>), 42.9 (CH<sub>2</sub>), 28.6 (CH<sub>2</sub>), 25.9 (CH<sub>2</sub>), 12.5 (CH<sub>3</sub>). HRMS (ESI/TOF-Q) m/z: [M]<sup>+</sup> calcd for C<sub>8</sub>H<sub>18</sub>N<sub>2</sub>O<sub>2</sub>S, 206.1089; found 206.1084.

### General procedure for reducing thiadiazine derivatives

To a solution of annulated thiadiazine **8a** (34.8 g, 200 mmol) in MTBE (150 mL) was added dioxane/HCl till pH=1. The resulting white precipitate was filtered-off, washed with MTBE (3×100 mL) and dried under reduced pressure. The stirred solution of hydrochloride (200 mmol) in dry methanol (200 mL) was cooled to -10°C. NaBH<sub>4</sub> (15.1 g, 400 mmol, 2 eq.) was added portionwise to the reaction mixture and was stirred for 24 h. Upon completion, the reaction mixture was diluted with H<sub>2</sub>O (30 mL), stirred for 10 min and volatiles were evaporated under reduced pressure. The residue was triturated with CHCl<sub>3</sub> (200 mL) and filtered off. The residue was washed with CHCl<sub>3</sub> (3×100 mL). The combined washings were dried over Na<sub>2</sub>SO<sub>4</sub> and evaporated under reduced pressure to afford a crude **9a**.

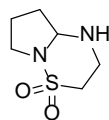

### Hexahydro-1H-pyrrolo[1,2-b][1,2,4]thiadiazine 4,4-dioxide 9a

M.p. 68°C, a white powder, 32.3 g (yield 91.6%)

$^1\text{H}$  NMR (400 MHz, DMSO- $d_6$ )  $\delta$  4.42-4.38 (m, 1H), 3.31-3.28 (m, 1H), 3.23-3.19 (m, 2H), 3.07-2.99 (m, 1H), 2.91-2.88 (m, 1H), 2.84-2.77 (m, 1H), 2.68-2.62 (m, 1H), 2.09-2.04 (m, 1H), 2.02-1.90 (m, 1H), 1.85-1.74 (m, 1H), 1.67-1.59 (m, 1H)  $^{13}\text{C}$  NMR (150 MHz, DMSO- $d_6$ )  $\delta$  76.7 (CH), 45.2 (CH<sub>2</sub>), 45.2 (CH<sub>2</sub>), 44.0 (CH<sub>2</sub>), 31.7 (CH<sub>2</sub>), 21.3 (CH<sub>2</sub>). HRMS (ESI/TOF-Q)  $m/z$ : [M]<sup>+</sup> calcd for C<sub>6</sub>H<sub>12</sub>N<sub>2</sub>O<sub>2</sub>S, 176.0619; found 176.0613.

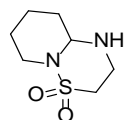

### Octahydropyrido[1,2-b][1,2,4]thiadiazine 4,4-dioxide 9c

M.p. 96°C, a white powder, 29.7 g (yield 86.7%)

$^1\text{H}$  NMR (400 MHz, DMSO- $d_6$ )  $\delta$  4.31 (s, 1H), 3.29-3.26 (m, 1H), 3.12-2.97 (m, 4H), 2.90-2.88 (m, 2H), 1.69-1.61 (m, 3H), 1.51-1.41 (m, 3H).  $^{13}\text{C}$  NMR (126 MHz, DMSO- $d_6$ )  $\delta$  71.3 (CH), 44.7 (CH<sub>2</sub>), 43.4 (CH<sub>2</sub>), 41.0 (CH<sub>2</sub>), 30.7 (CH<sub>2</sub>), 24.9 (CH<sub>2</sub>), 19.0 (CH<sub>2</sub>). HRMS (ESI/TOF-Q)  $m/z$ : [M]<sup>+</sup> calcd for C<sub>7</sub>H<sub>14</sub>N<sub>2</sub>O<sub>2</sub>S, 190.0776; found 190.0772.

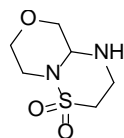

### Hexahydro-1H-[1,4]oxazino[4,3-b][1,2,4]thiadiazine 4,4-dioxide 9d

M.p. 172°C, a white powder, 17.5 g (yield 93.1%)

$^1\text{H}$  NMR (400 MHz, DMSO- $d_6$ )  $\delta$  4.20 (d,  $J$  = 11.6 Hz, 1H), 3.85-3.82 (m, 1H), 3.71-3.68 (m, 1H), 3.59-3.50 (m, 2H), 3.31-2.25 (m, 2H), 3.08-2.94 (m, 5H).  $^{13}\text{C}$  NMR (150 MHz, DMSO- $d_6$ )  $\delta$  70.0 (CH<sub>2</sub>), 69.9 (CH), 66.3 (CH<sub>2</sub>), 44.0 (CH<sub>2</sub>), 43.4 (CH<sub>2</sub>),

41.0 (CH<sub>2</sub>). HRMS (ESI/TOF-Q) m/z: [M]<sup>+</sup> calcd for C<sub>6</sub>H<sub>12</sub>N<sub>2</sub>O<sub>3</sub>S, 192.0569; found 192.0563.

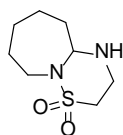

### Octahydro-1H-[1,2,4]thiadiazino[2,3-a]azepine 4,4-dioxide 9f

M.p. 81°C, a white powder, 17.9 g (yield 93.2%)

<sup>1</sup>H NMR (400 MHz, DMSO-*d*<sub>6</sub>) δ 4.46-4.39 (m, 1H), 3.32-3.22 (m, 2H), 3.06-2.97 (m, 2H), 2.90-2.87 (m, 1H), 2.75-2.69 (m, 1H), 2.61-2.53 (m, 1H), 2.21-2.14 (m, 1H), 1.80-1.72 (m, 2H), 1.64-1.57 (m, 1H), 1.38-1.16 (m, 4H). <sup>13</sup>C NMR (100 MHz, DMSO-*d*<sub>6</sub>) δ 74.4 (CH), 46.7 (CH<sub>2</sub>), 43.8 (CH<sub>2</sub>), 41.6 (CH<sub>2</sub>), 34.8 (CH<sub>2</sub>), 31.3 (CH<sub>2</sub>), 30.0 (CH<sub>2</sub>), 23.0 (CH<sub>2</sub>). HRMS (ESI/TOF-Q) m/z: [M]<sup>+</sup> calcd for C<sub>8</sub>H<sub>16</sub>N<sub>2</sub>O<sub>2</sub>S, 204.0932; found 204.0927.

### General procedure for the synthesis of tertiary salts 12

CH<sub>3</sub>I (49.7 g, 350 mmol, 7 eq.) was added to a stirring solution of **8a** (8.7 g, 50 mmol) in acetone (100 mL). The reaction mixture was refluxed for 3 h. After cooling to rt the precipitated solid was filtered off, washed with ether (3×100 mL) and dried under argon atmosphere to afford a pure quaternary salt **12a**. Compounds **12d** and **12e** were used in the next step without any characterization.

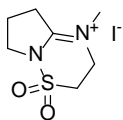

### 1-methyl-3,6,7,8-tetrahydro-2H-pyrrolo[1,2-b][1,2,4]thiadiazin-1-ium 4,4-dioxide iodide 12a

M.p. 215-217°C, a white powder, 12.7 g (yield 80.4%)

$^1\text{H}$  NMR (400 MHz, DMSO- $d_6$ ) 4.25 (br.s, 2H), 4.19 (br.s, 2H), 4.01-3.97 (m, 2H), 3.36 (s, 3H), 3.26-3.22 (m, 2H), 2.17-2.15 (m, 2H).  $^{13}\text{C}$  NMR (100 MHz, DMSO- $d_6$ )  $\delta$  169.4 (C), 50.2 ( $\text{CH}_2$ ), 50.0 ( $\text{CH}_2$ ), 44.7 ( $\text{CH}_2$ ), 42.8 ( $\text{CH}_3$ ), 33.6 ( $\text{CH}_2$ ), 18.6 ( $\text{CH}_2$ ). Elemental analysis: Calcd. for  $\text{C}_7\text{H}_{13}\text{IN}_2\text{O}_2\text{S}$  (316.16): C 26.59, H 4.14, I 40.14 N 8.86, O 10.12, S 10.14 Found: C 26.66, H 4.09, I 40.19 N 8.90, S 10.16.

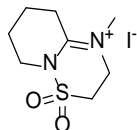

**1-methyl-2,3,6,7,8,9-hexahydropyrido[1,2-b][1,2,4]thiadiazin-1-ium 4,4-dioxide iodide 12b**

M.p. 173°C, a white powder, 7.2 g (yield 72.9%)

$^1\text{H}$  NMR (400 MHz, DMSO- $d_6$ )  $\delta$  4.33-4.29 (m, 2H), 4.26-4.22 (m, 2H), 3.71-3.67 (m, 2H), 3.33 (s, 3H), 2.92-2.88 (m, 2H), 1.84-1.76 (m, 4H).  $^{13}\text{C}$  NMR (100 MHz, DMSO- $d_6$ )  $\delta$  165.6, 50.1, 43.9, 43.6, 42.5, 29.5, 20.6, 18.0. Elemental analysis: Calcd. for  $\text{C}_8\text{H}_{15}\text{IN}_2\text{O}_2\text{S}$  (330.19): C 29.10, H 4.58, I 38.43, N 8.48, O 9.69, S 9.71 Found: C 29.16, H 4.63, I 38.49, N 8.49, S 9.78.

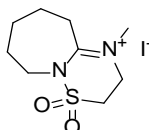

**1-methyl-3,6,7,8,9,10-hexahydro-2H-[1,2,4]thiadiazino[2,3-a]azepin-1-ium 4,4-dioxide iodide 12c**

M.p. 158-161°C, a white powder, 6.3 g (yield 67.0%)

$^1\text{H}$  NMR (400 MHz, DMSO- $d_6$ )  $\delta$  4.31-4.26 (m, 4H), 4.05-4.02 (m, 2H), 3.47 (s, 3H), 3.06-3.04 (m, 2H), 1.76-1.69 (m, 6H)  $^{13}\text{C}$  NMR (126 MHz, DMSO- $d_6$ )  $\delta$  169.6 (C), 49.8 ( $\text{CH}_2$ ), 44.2 ( $\text{CH}_2$ ), 43.9 ( $\text{CH}_3$ ), 43.8 ( $\text{CH}_2$ ), 30.4 ( $\text{CH}_2$ ), 26.9 ( $\text{CH}_2$ ), 26.9 ( $\text{CH}_2$ ), 21.6 ( $\text{CH}_2$ ). Elemental analysis: Calcd. for  $\text{C}_9\text{H}_{17}\text{IN}_2\text{O}_2\text{S}$  (344.21): C 31.40, H 4.98, I 36.87, N 8.14, O 9.30, S 9.32 Found: C 31.37, H 5.04, I 36.92, N 8.17, S 9.28.

**General procedure for reductive cleavage of tertiary salts 12**



To a stirred solution of **12a** (15.8 g, 50 mmol, 1 eq.) in glacial acetic acid (80 mL) was added portionwise NaBH<sub>3</sub>CN (12.6 g, 200 mmol, 4 eq.). The reaction mixture was stirred for 24 h at 80°C. The reaction mixture was diluted with water (40 mL) and allowed cooling to 20°C. It was quenched with 50% aqueous NaOH till pH=14 at 20°C. The precipitated solid was filtered off and washed with CHCl<sub>3</sub> (5×75 mL). The filtrate was extracted with CHCl<sub>3</sub> (3×70 mL), combined organics were dried over Na<sub>2</sub>SO<sub>4</sub> and evaporated under reduced pressure till dryness to afford a pure *N*-Me azasultam **14a**.

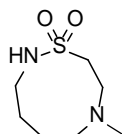

### 7-methyl-1,2,7-thiadiazonane 1,1-dioxide **14a**

Yellow oil, 9.0 g (yield 94.2%).

<sup>1</sup>H NMR (400 MHz, DMSO-*d*<sub>6</sub>) δ 6.65 (br.s, 1H), 3.26-3.23 (m, 4H), 2.64 (t, *J* = 6.0 Hz, 2H), 2.44 (m, 2H), 2.25 (s, 3H), 1.58 (m, 4H). <sup>13</sup>C NMR (126 MHz, DMSO-*d*<sub>6</sub>) δ 56.2 (CH<sub>2</sub>), 53.0 (CH<sub>2</sub>), 51.5 (CH<sub>2</sub>), 45.4 (CH<sub>3</sub>), 42.2 (CH<sub>2</sub>), 28.2 (CH<sub>2</sub>), 24.5 (CH<sub>2</sub>). HRMS (ESI/TOF-Q) *m/z*: [M]<sup>+</sup> calcd for C<sub>7</sub>H<sub>16</sub>N<sub>2</sub>O<sub>2</sub>S, 192.0932; found 192.0929.

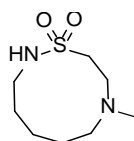

### 8-methyl-1,2,8-thiadiazecane 1,1-dioxide **14b**

M.p. 49-52°C, a white powder, 8.7 g (yield 96.1%)

<sup>1</sup>H NMR (400 MHz, DMSO-*d*<sub>6</sub>) δ 6.45 (br.s, 1H), 3.25-3.22 (m, 2H), 3.09 (br.s, 2H), 2.66-2.64 (m, 2H), 2.34 (br.s, 2H), 2.15 (s, 3H), 1.49 (br.s, 6H). <sup>13</sup>C NMR (126 MHz, DMSO-*d*<sub>6</sub>) δ 52.7 (CH<sub>2</sub>), 52.5 (CH<sub>2</sub>), 49.3 (CH<sub>2</sub>), 42.9 (CH<sub>3</sub>), 42.1 (CH<sub>2</sub>), 26.4 (CH<sub>2</sub>), 25.3 (CH<sub>2</sub>), 20.7 (CH<sub>2</sub>). HRMS (ESI/TOF-Q) *m/z*: [M]<sup>+</sup> calcd for C<sub>8</sub>H<sub>18</sub>N<sub>2</sub>O<sub>2</sub>S, 206.1089; found 206.1080.

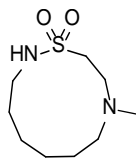

**9-methyl-1-thia-2,9-diazacycloundecane 1,1-dioxide 14c**

M.p. 63-66°C, a white powder, 7.3 g (yield 92.7%)

$^1\text{H}$  NMR (400 MHz, DMSO- $d_6$ )  $\delta$  6.50 (br.s, 1H), 3.19-3.17 (m, 2H), 3.06 (br.s, 2H), 2.65-2.63 (m, 2H), 2.38 (m, 2H), 2.09 (s, 3H), 1.40-1.34 (m, 8H).  $^{13}\text{C}$  NMR (126 MHz, DMSO- $d_6$ )  $\delta$  53.7 (CH<sub>2</sub>), 53.3 (CH<sub>2</sub>), 50.3 (CH<sub>2</sub>), 41.4 (CH<sub>3</sub>), 40.0 (CH<sub>2</sub>), 26.7 (CH<sub>2</sub>), 24.5 (CH<sub>2</sub>), 22.3 (CH<sub>2</sub>), 20.9 (CH<sub>2</sub>). HRMS (ESI/TOF-Q)  $m/z$ : [M]<sup>+</sup> calcd for C<sub>9</sub>H<sub>20</sub>N<sub>2</sub>O<sub>2</sub>S, 220.1245; found 220.1235.

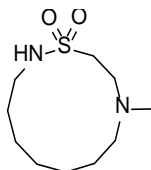

**10-methyl-1-thia-2,10-diazacyclododecane 1,1-dioxide 14d**

M.p. 68-71°C, a white powder, 7.8 g (yield 94.7%)

$^1\text{H}$  NMR (400 MHz, DMSO- $d_6$ )  $\delta$  7.12 (br.s, 1H), 3.14 (br.s, 2H), 2.99 (br.s, 2H), 2.58 (br.s, 2H), 2.32 (br.s, 2H), 2.13 (s, 3H), 1.44-1.35 (m, 10H).  $^{13}\text{C}$  NMR (100 MHz, DMSO- $d_6$ )  $\delta$  55.8 (CH<sub>2</sub>), 50.5 (CH<sub>2</sub>), 48.7 (CH<sub>2</sub>), 43.6 (CH<sub>3</sub>), 40.9 (CH<sub>2</sub>), 26.2 (CH<sub>2</sub>), 24.6 (CH<sub>2</sub>), 23.1 (CH<sub>2</sub>), 22.8 (CH<sub>2</sub>), 22.4 (CH<sub>2</sub>). HRMS (ESI/TOF-Q)  $m/z$ : [M]<sup>+</sup> calcd for C<sub>10</sub>H<sub>22</sub>N<sub>2</sub>O<sub>2</sub>S, 234.1402; found 234.1395.

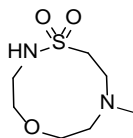

**8-methyl-1,5,4,8-oxathiadiazecane 5,5-dioxide 14e (purity 92%)**

M.p. 105-109°C, a white powder, 4.7 g (yield 94.0%)

$^1\text{H}$  NMR (400 MHz,  $\text{DMSO-}d_6$ )  $\delta$  6.89 (br.s, 1H), 3.47-3.42 (m, 4H), 3.19 (br.s, 2H), 3.03 (br.s, 2H), 2.85-2.82 (br.s, 2H), 2.43 (br.s, 2H), 2.18 (s, 3H).  $^{13}\text{C}$  NMR (126 MHz,  $\text{DMSO-}d_6$ )  $\delta$  68.9 ( $\text{CH}_2$ ), 68.5 ( $\text{CH}_2$ ), 53.4 ( $\text{CH}_2$ ), 50.1 ( $\text{CH}_2$ ), 47.7 ( $\text{CH}_2$ ), 43.4 ( $\text{CH}_2$ ), 43.0 ( $\text{CH}_3$ ). HRMS (ESI/TOF-Q)  $m/z$ :  $[\text{M}]^+$  calcd for  $\text{C}_7\text{H}_{16}\text{N}_2\text{O}_3\text{S}$ , 208.0882; found 208.0874.

### General procedure of reduction reaction of tertiary salts 12

The stirred solution of tertiary salt **12a** (25.3 g, 80 mmol, 1 eq.) in dry methanol (200 mL) was cooled to  $-10^\circ\text{C}$ . To the reaction mixture was added portionwise  $\text{NaBH}_4$  (6.0 g, 160 mmol, 2 eq.) and was stirred for 24 h. The reaction mixture was diluted with  $\text{H}_2\text{O}$  (20 mL), stirred for 10 min and volatiles were evaporated under reduced pressure. The residue was triturated with  $\text{CHCl}_3$  (150 mL) and filtered off. The residue was washed with  $\text{CHCl}_3$  ( $3 \times 100$  mL). The washings were collected, dried over  $\text{Na}_2\text{SO}_4$  and evaporated under reduced pressure to afford **13a**.

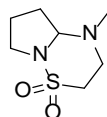

### 1-methylhexahydro-1H-pyrrolo[1,2-b][1,2,4]thiadiazine 4,4-dioxide 13a

M.p.  $96\text{--}99^\circ\text{C}$ , a white powder, 13.3 g (yield 87.8%)

$^1\text{H}$  NMR (400 MHz,  $\text{DMSO-}d_6$ )  $\delta$  3.92-3.90 (m, 1H), 3.34-3.20 (m, 3H), 3.17-3.13 (m, 1H), 3.10-3.04 (m, 1H), 2.85-2.79 (m, 1H), 2.19 (s, 3H), 2.02-1.76 (m, 4H)  $^{13}\text{C}$  NMR (100 MHz,  $\text{DMSO-}d_6$ )  $\delta$  81.2 (CH), 53.5 ( $\text{CH}_2$ ), 46.1 ( $\text{CH}_2$ ), 45.7 ( $\text{CH}_2$ ), 38.8 (CH), 30.3 ( $\text{CH}_2$ ), 21.5 ( $\text{CH}_2$ ). HRMS (ESI/TOF-Q)  $m/z$ :  $[\text{M}]^+$  calcd for  $\text{C}_7\text{H}_{14}\text{N}_2\text{O}_2\text{S}$ , 190.0776; found 190.0772.

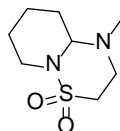

**1-methyloctahydropyrido[1,2-b][1,2,4]thiadiazine 4,4-dioxide 13b**

M.p. 74-76°C, a white powder, 5.1 g (yield 91.1%)

$^1\text{H}$  NMR (400 MHz, DMSO- $d_6$ )  $\delta$  3.92 (s, 1H), 3.36-3.29 (m, 1H), 3.23-3.08 (m, 4H), 2.70-2.63 (m, 1H), 2.18 (s, 3H), 2.01-1.99 (m, 1H), 1.72-1.69 (m, 1H), 1.53-1.43 (m, 4H).  $^{13}\text{C}$  NMR (126 MHz, DMSO- $d_6$ )  $\delta$  75.7 (CH), 53.3 (CH<sub>2</sub>), 44.9 (CH<sub>2</sub>), 42.8 (CH<sub>2</sub>), 39.4 (CH<sub>3</sub>), 28.2 (CH<sub>2</sub>), 24.9 (CH<sub>2</sub>), 18.2 (CH<sub>2</sub>). HRMS (ESI/TOF-Q)  $m/z$ : [M]<sup>+</sup> calcd for C<sub>8</sub>H<sub>16</sub>N<sub>2</sub>O<sub>2</sub>S, 204.0932; found 204.0929.

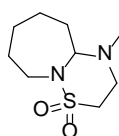**1-methyloctahydro-1H-[1,2,4]thiadiazino[2,3-a]azepine 4,4-dioxide 13c**

Yellow oil, 6.7 g (yield 84.6%)

$^1\text{H}$  NMR (400 MHz, DMSO- $d_6$ )  $\delta$  4.08-4.04 (m, 1H), 3.52-4.48 (m, 1H), 3.11-3.05 (m, 4H), 2.90-2.79 (m, 1H), 2.20 (s, 3H), 2.15-2.08 (m, 1H), 1.76-1.69 (m, 3H), 1.57-1.48 (m, 1H), 1.40-1.22 (m, 3H).  $^{13}\text{C}$  NMR (126 MHz, DMSO- $d_6$ )  $\delta$  78.1 (CH), 52.9 (CH<sub>2</sub>), 45.8 (CH<sub>2</sub>), 43.3 (CH<sub>2</sub>), 37.4 (CH<sub>3</sub>), 32.4 (CH<sub>2</sub>), 30.9 (CH<sub>2</sub>), 29.1 (CH<sub>2</sub>), 22.8 (CH<sub>2</sub>). HRMS (ESI/TOF-Q)  $m/z$ : [M]<sup>+</sup> calcd for C<sub>9</sub>H<sub>18</sub>N<sub>2</sub>O<sub>2</sub>S, 218.1089; found 218.1083.

**Procedure for hydrolytic cleavage of tertiary salt 12a**

Solid K<sub>2</sub>CO<sub>3</sub> (97 mg, 0.7 mmol, 2.2 eq) was added to the solution of tertiary salt **12a** (100 mg, 0.32 mmol, 1 eq.) in water (3 mL). The reaction mixture stirred at room temperature for 24h. It was extracted with CHCl<sub>3</sub> (3×15 mL), the combined extracts were dried under Na<sub>2</sub>SO<sub>4</sub> and concentrated under reduced pressure to afford **15**.

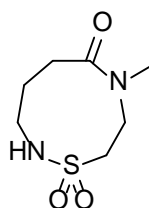

### 7-methyl-1,2,7-thiadiazonan-6-one 1,1-dioxide **15**

M.p. 191°C, a white powder, 51 mg (yield 78.5%).

$^1\text{H}$  NMR (500 MHz, DMSO- $d_6$ )  $\delta$  6.99 (t,  $J = 5.50$  Hz, 1H), 3.82-3.80 (m, 2H), 3.25-3.23 (m, 2H), 3.19-3.15 (m, 2H), 2.79 (s, 3H), 2.39-2.37 (m, 2H), 1.77-1.72 (m, 2H).  $^{13}\text{C}$  NMR (126 MHz, DMSO- $d_6$ )  $\delta$  173.6 (C), 51.0 ( $\text{CH}_2$ ), 45.9 ( $\text{CH}_2$ ), 41.8 ( $\text{CH}_2$ ), 32.9 ( $\text{CH}_3$ ), 29.4 ( $\text{CH}_2$ ), 27.3 ( $\text{CH}_2$ ). HRMS (ESI/TOF-Q)  $m/z$ :  $[\text{M}]^+$  calcd for  $\text{C}_7\text{H}_{14}\text{N}_2\text{O}_3\text{S}$ , 206.0725; found 206.0716.

### X-ray experimental part

X-ray diffraction studies of compounds **11g** ( $\text{C}_9\text{H}_{20}\text{N}_2\text{O}_2\text{S}$ ,  $\text{H}_2\text{O}$ ) and **15** ( $\text{C}_7\text{H}_{14}\text{N}_2\text{O}_3\text{S}$ ) have been performed using the Bruker APEX II diffractometer (graphite monochromated  $\text{MoK}_\alpha$  radiation, CCD detector,  $\varphi$ - and  $\omega$ -scanning,  $2\Theta_{\text{max}} = 50^\circ$ ). The structures were solved by direct method using SHELXTL package [1, 2]. Positions of the hydrogen atoms were located from electron density difference maps and refined using “riding” model with  $U_{\text{iso}} = nU_{\text{eq}}$  ( $n=1.5$  for methyl group or  $n=1.2$  for other hydrogen atoms) of the carrier atom.

Crystallographic data for **11g**:

The colourless crystals of **11g** are monoclinic. At 173 K  $a = 10.7318(3)$ ,  $b = 8.4291(3)$ ,  $c = 13.947(5)$  Å,  $\beta = 99.819(2)^\circ$ ,  $V = 1243.22(7)$  Å<sup>3</sup>,  $M_r = 238.34$ ,  $Z = 4$ , space group  $P2_1/n$ ,  $d_{\text{calc}} = 1.273$  g/cm<sup>3</sup>,  $\mu(\text{MoK}_\alpha) = 0.253$  mm<sup>-1</sup>,  $F(000) = 520$ . Intensities of 15580 reflections (2190 independent,  $R_{\text{int}} = 0.022$ ) were measured. Full-matrix least-squares refinement against  $F^2$  in anisotropic approximation for non-hydrogen atoms

using 2190 reflections was converged to  $wR_2 = 0.097$  ( $R_1 = 0.038$  for 1855 reflections with  $F > 4\sigma(F)$ ,  $S = 1.046$ ). The final atomic coordinates, and crystallographic data for molecule **11g** have been deposited to with the Cambridge Crystallographic Data Centre, 12 Union Road, CB2 1EZ, UK (fax: +44-1223-336033; e-mail: deposit@ccdc.cam.ac.uk) and are available on request quoting the deposition numbers CCDC 2266969).

Crystallographic data for **15**:

The colourless crystals of **15** are monoclinic. At 173 K  $a = 9.4126(2)$ ,  $b = 9.9316(3)$ ,  $c = 10.3407(3)$  Å,  $\beta = 103.903(2)^\circ$ ,  $V = 938.35(4)$  Å<sup>3</sup>,  $M_r = 206.26$ ,  $Z = 4$ , space group  $P2_1/c$ ,  $d_{\text{calc}} = 1.460$  g/cm<sup>3</sup>,  $\mu(\text{MoK}_\alpha) = 0.323$  mm<sup>-1</sup>,  $F(000) = 440$ . Intensities of 9961 reflections (1647 independent,  $R_{\text{int}} = 0.016$ ) were measured. Full-matrix least-squares refinement against  $F^2$  in anisotropic approximation for non-hydrogen atoms using 1647 reflections was converged to  $wR_2 = 0.086$  ( $R_1 = 0.032$  for 1507 reflections with  $F > 4\sigma(F)$ ,  $S = 1.070$ ). The final atomic coordinates, and crystallographic data for molecule **15** have been deposited to with the Cambridge Crystallographic Data Centre, 12 Union Road, CB2 1EZ, UK (fax: +44-1223-336033; e-mail: deposit@ccdc.cam.ac.uk) and are available on request quoting the deposition numbers CCDC 2266968).

Reference:

1. Sheldrick GM (2015) *Acta Crystallographica Section A Foundations and Advances*, 71, 3–8
2. Sheldrick, G. M. (2015). *Acta Crystallographica Section C*, **71**, 3–8

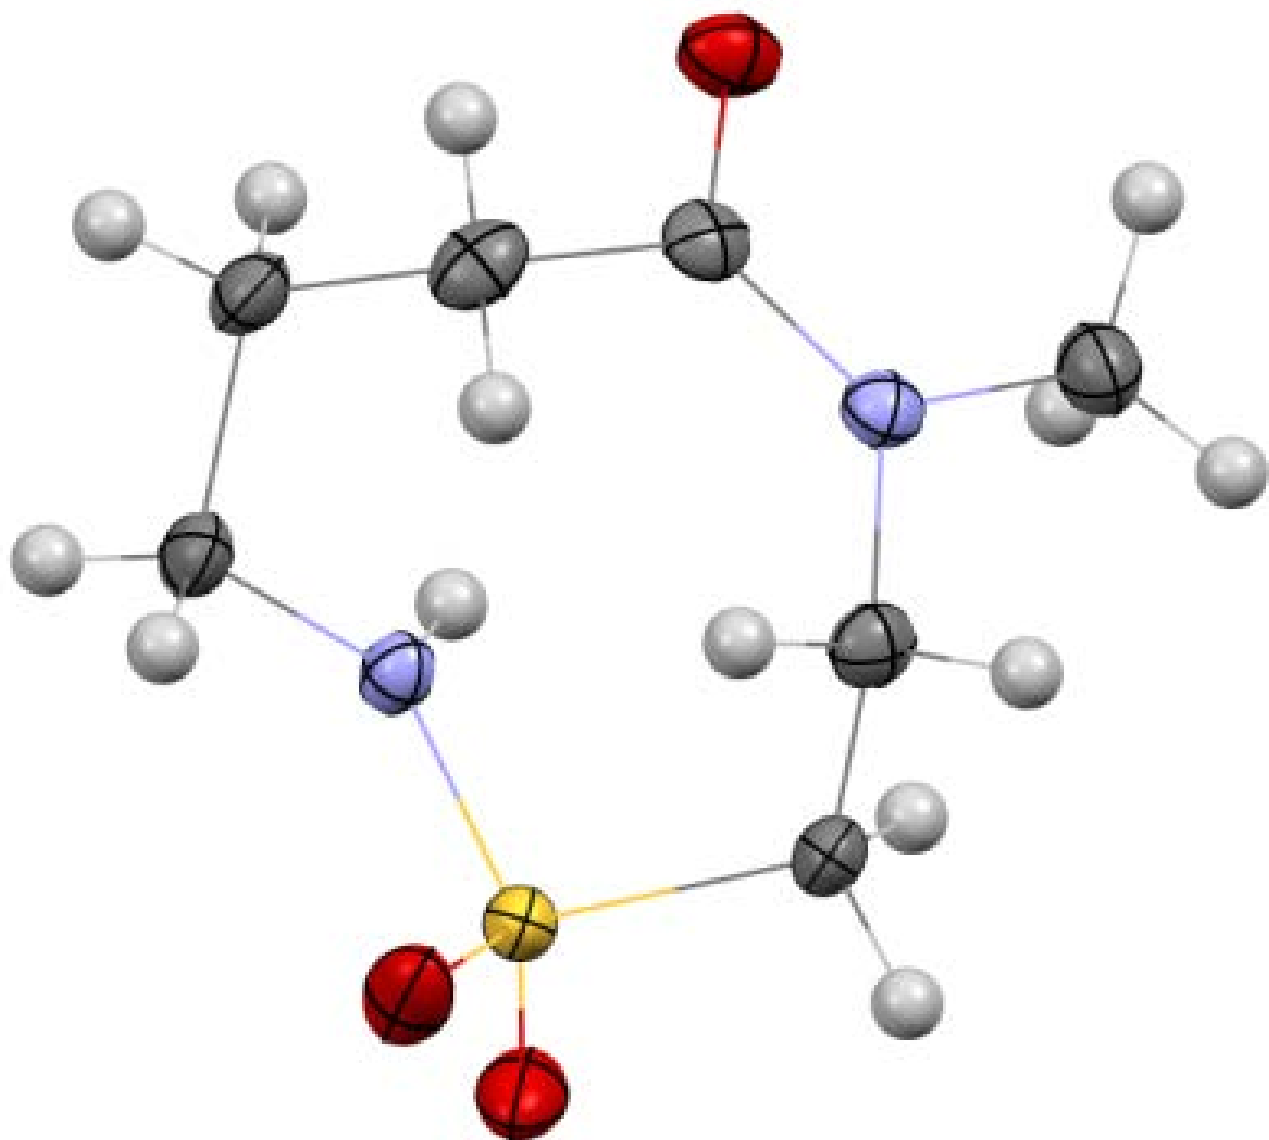

**Figure S1.** Molecular structure of compound **15** with the thermal displacements of non-hydrogen atoms at the 50% probability level.

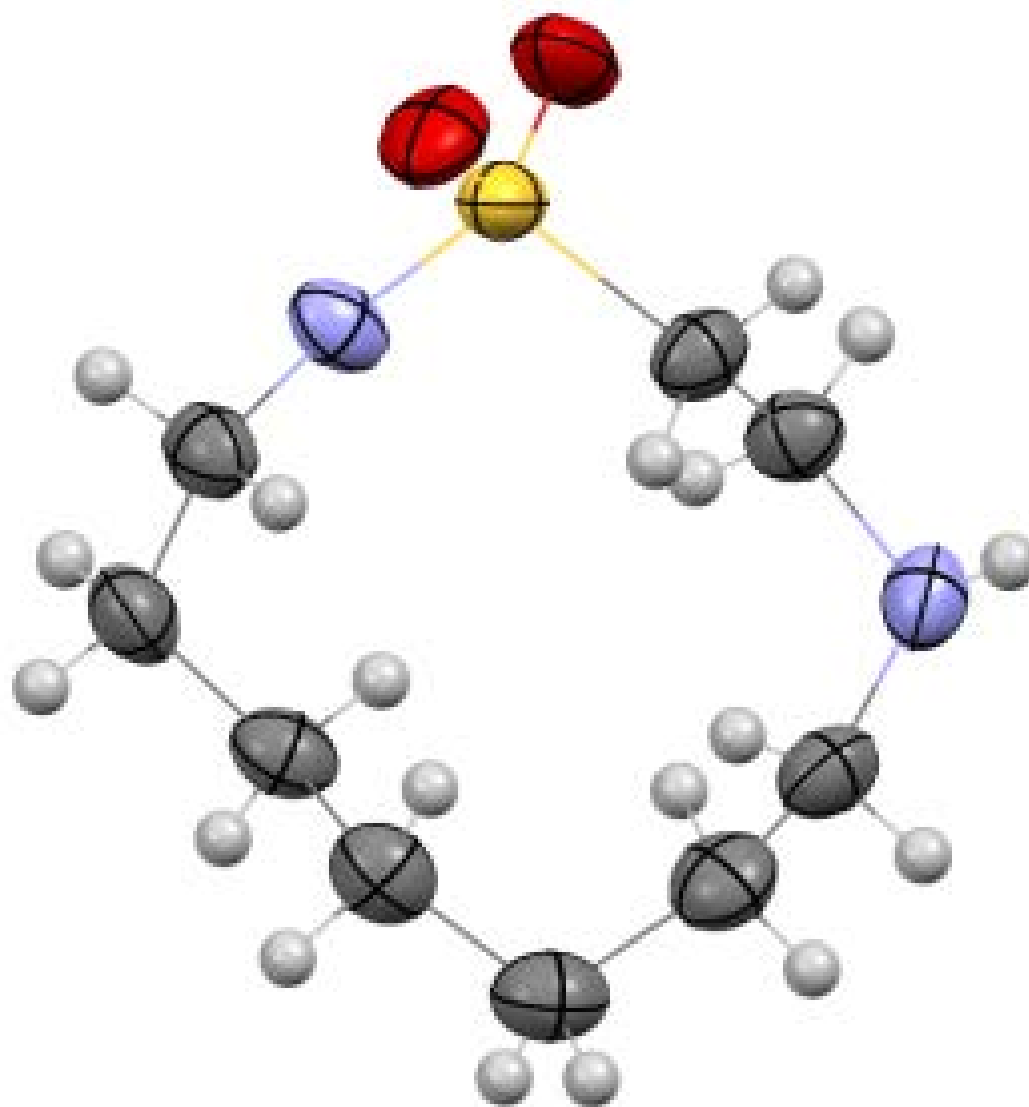

**Figure S2.** Molecular structure of compound **11g** with the thermal displacements of non-hydrogen atoms at the 50% probability level.



PPM

S23

lv17\_1

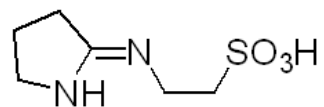**7a** D<sub>2</sub>O

4.790

3.731

3.712

3.694

3.677

3.214

3.197

3.181

2.893

2.873

2.853

2.255

2.237

2.218

2.200

2.180

2.165

2.161

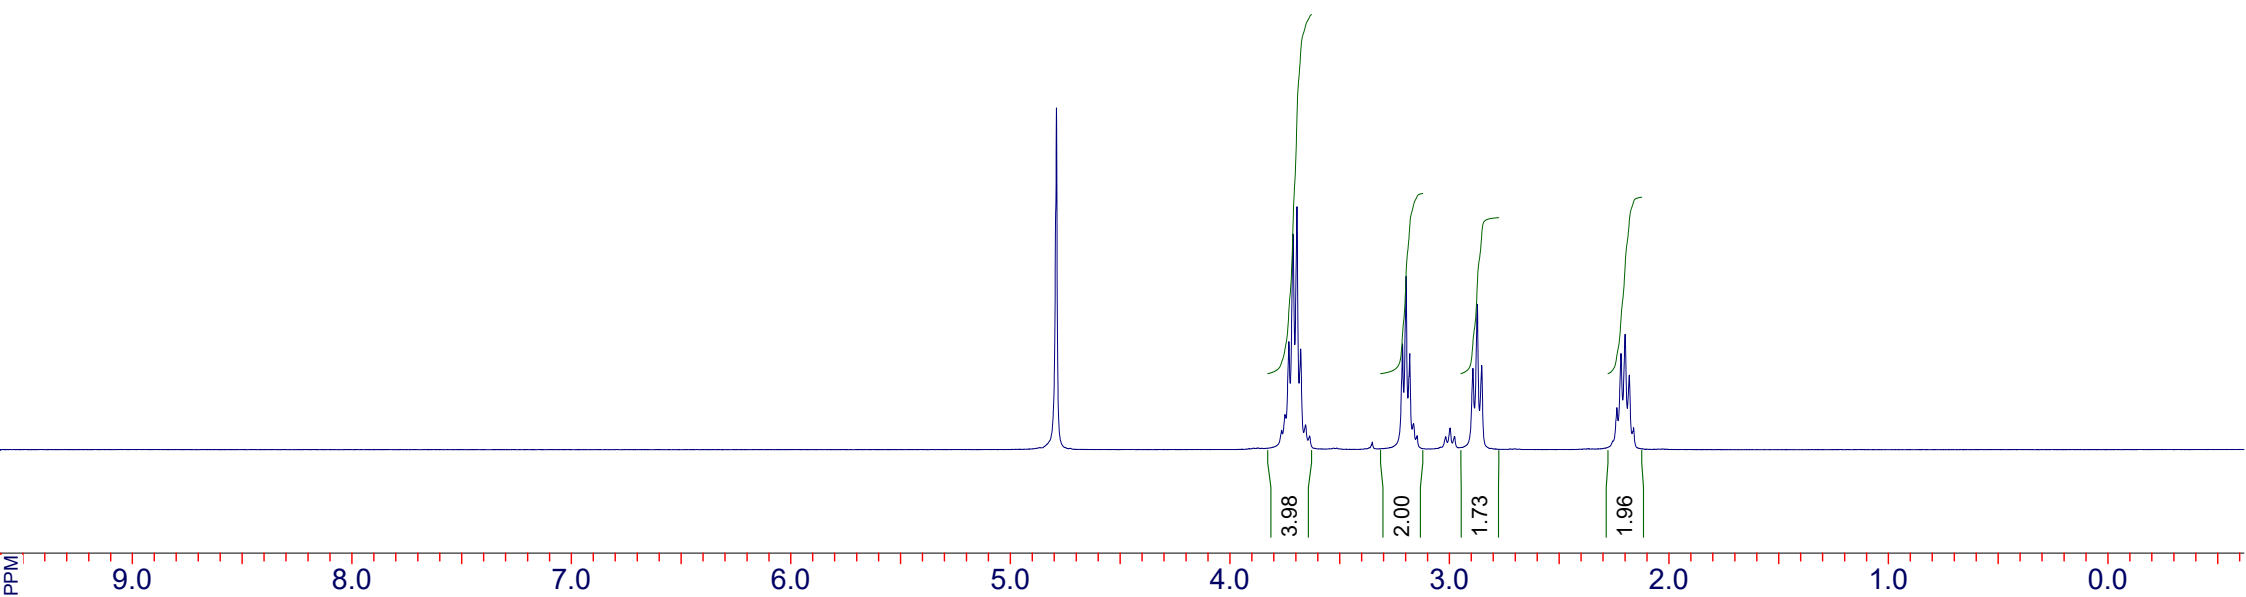

File name: lv17\_1

Operator: nmr

SF: 400.1300 MHz

NSC: 1

PW: 0.00 usec, RG: 25

SI: 32768

Date: 30-May-2022

Solvent: DMSO

SW: 8224 Hz

TE: 300 K

AQ: 1.99 sec, RD: 0.00 sec

lv-17\_C13.fid

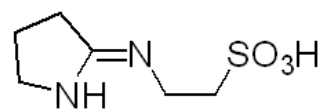**7a** D<sub>2</sub>O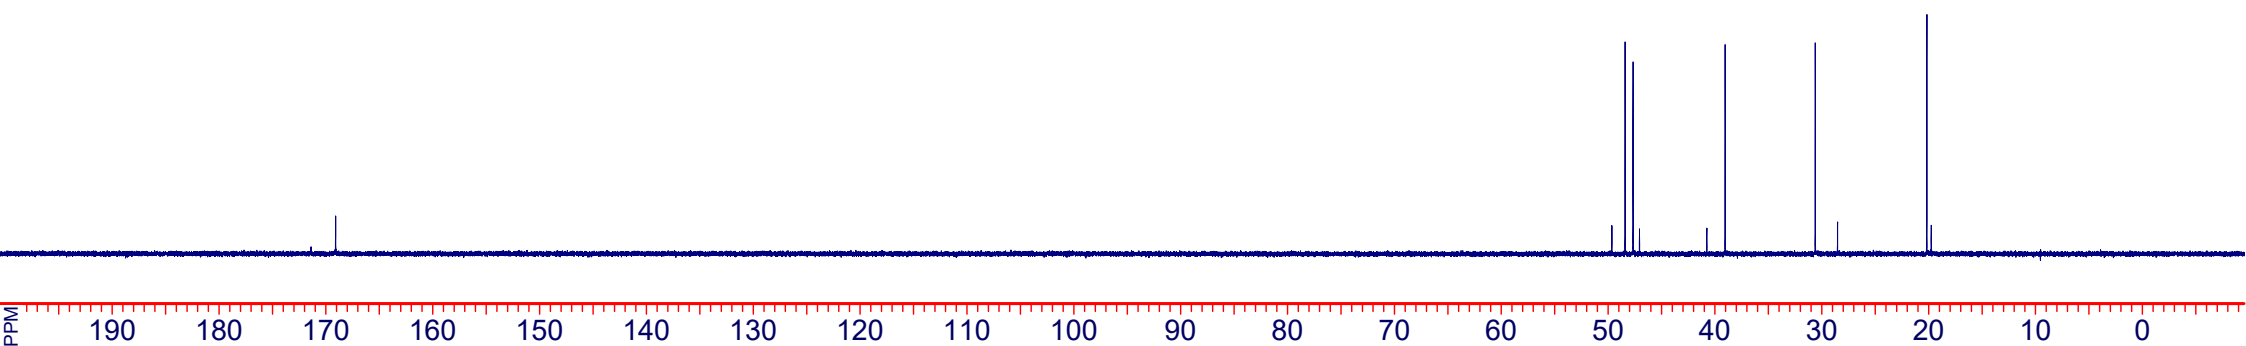

File name: lv-17\_C13.fid

Operator:

SF: 150.8301 MHz

NSC: 0

PW: 3.09 usec, RG: 60

SI: 65536

Date: 02-Jun-2022

Solvent: d2o

SW: 37879 Hz

TE: 298 K

AQ: 0.87 sec, RD: 0.00 sec

PPM

169.10

48.43  
47.68

39.07

30.63

20.18

S25

lv-17\_C13APT.fid

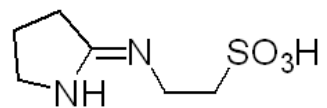**7a** D<sub>2</sub>O

PPM

190 180 170 160 150 140 130 120 110 100 90 80 70 60 50 40 30 20 10

File name: lv-17\_C13APT.fid

Operator:

SF: 150.8329 MHz

NSC: 0

PW: 4.63 usec, RG: 60

SI: 131072

Date: 02-Jun-2022

Solvent: d2o

SW: 39063 Hz

TE: 298 K

AQ: 0.87 sec, RD: 0.00 sec

lv-615.fid

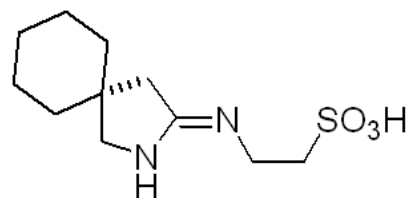**7b** CF<sub>3</sub>COOD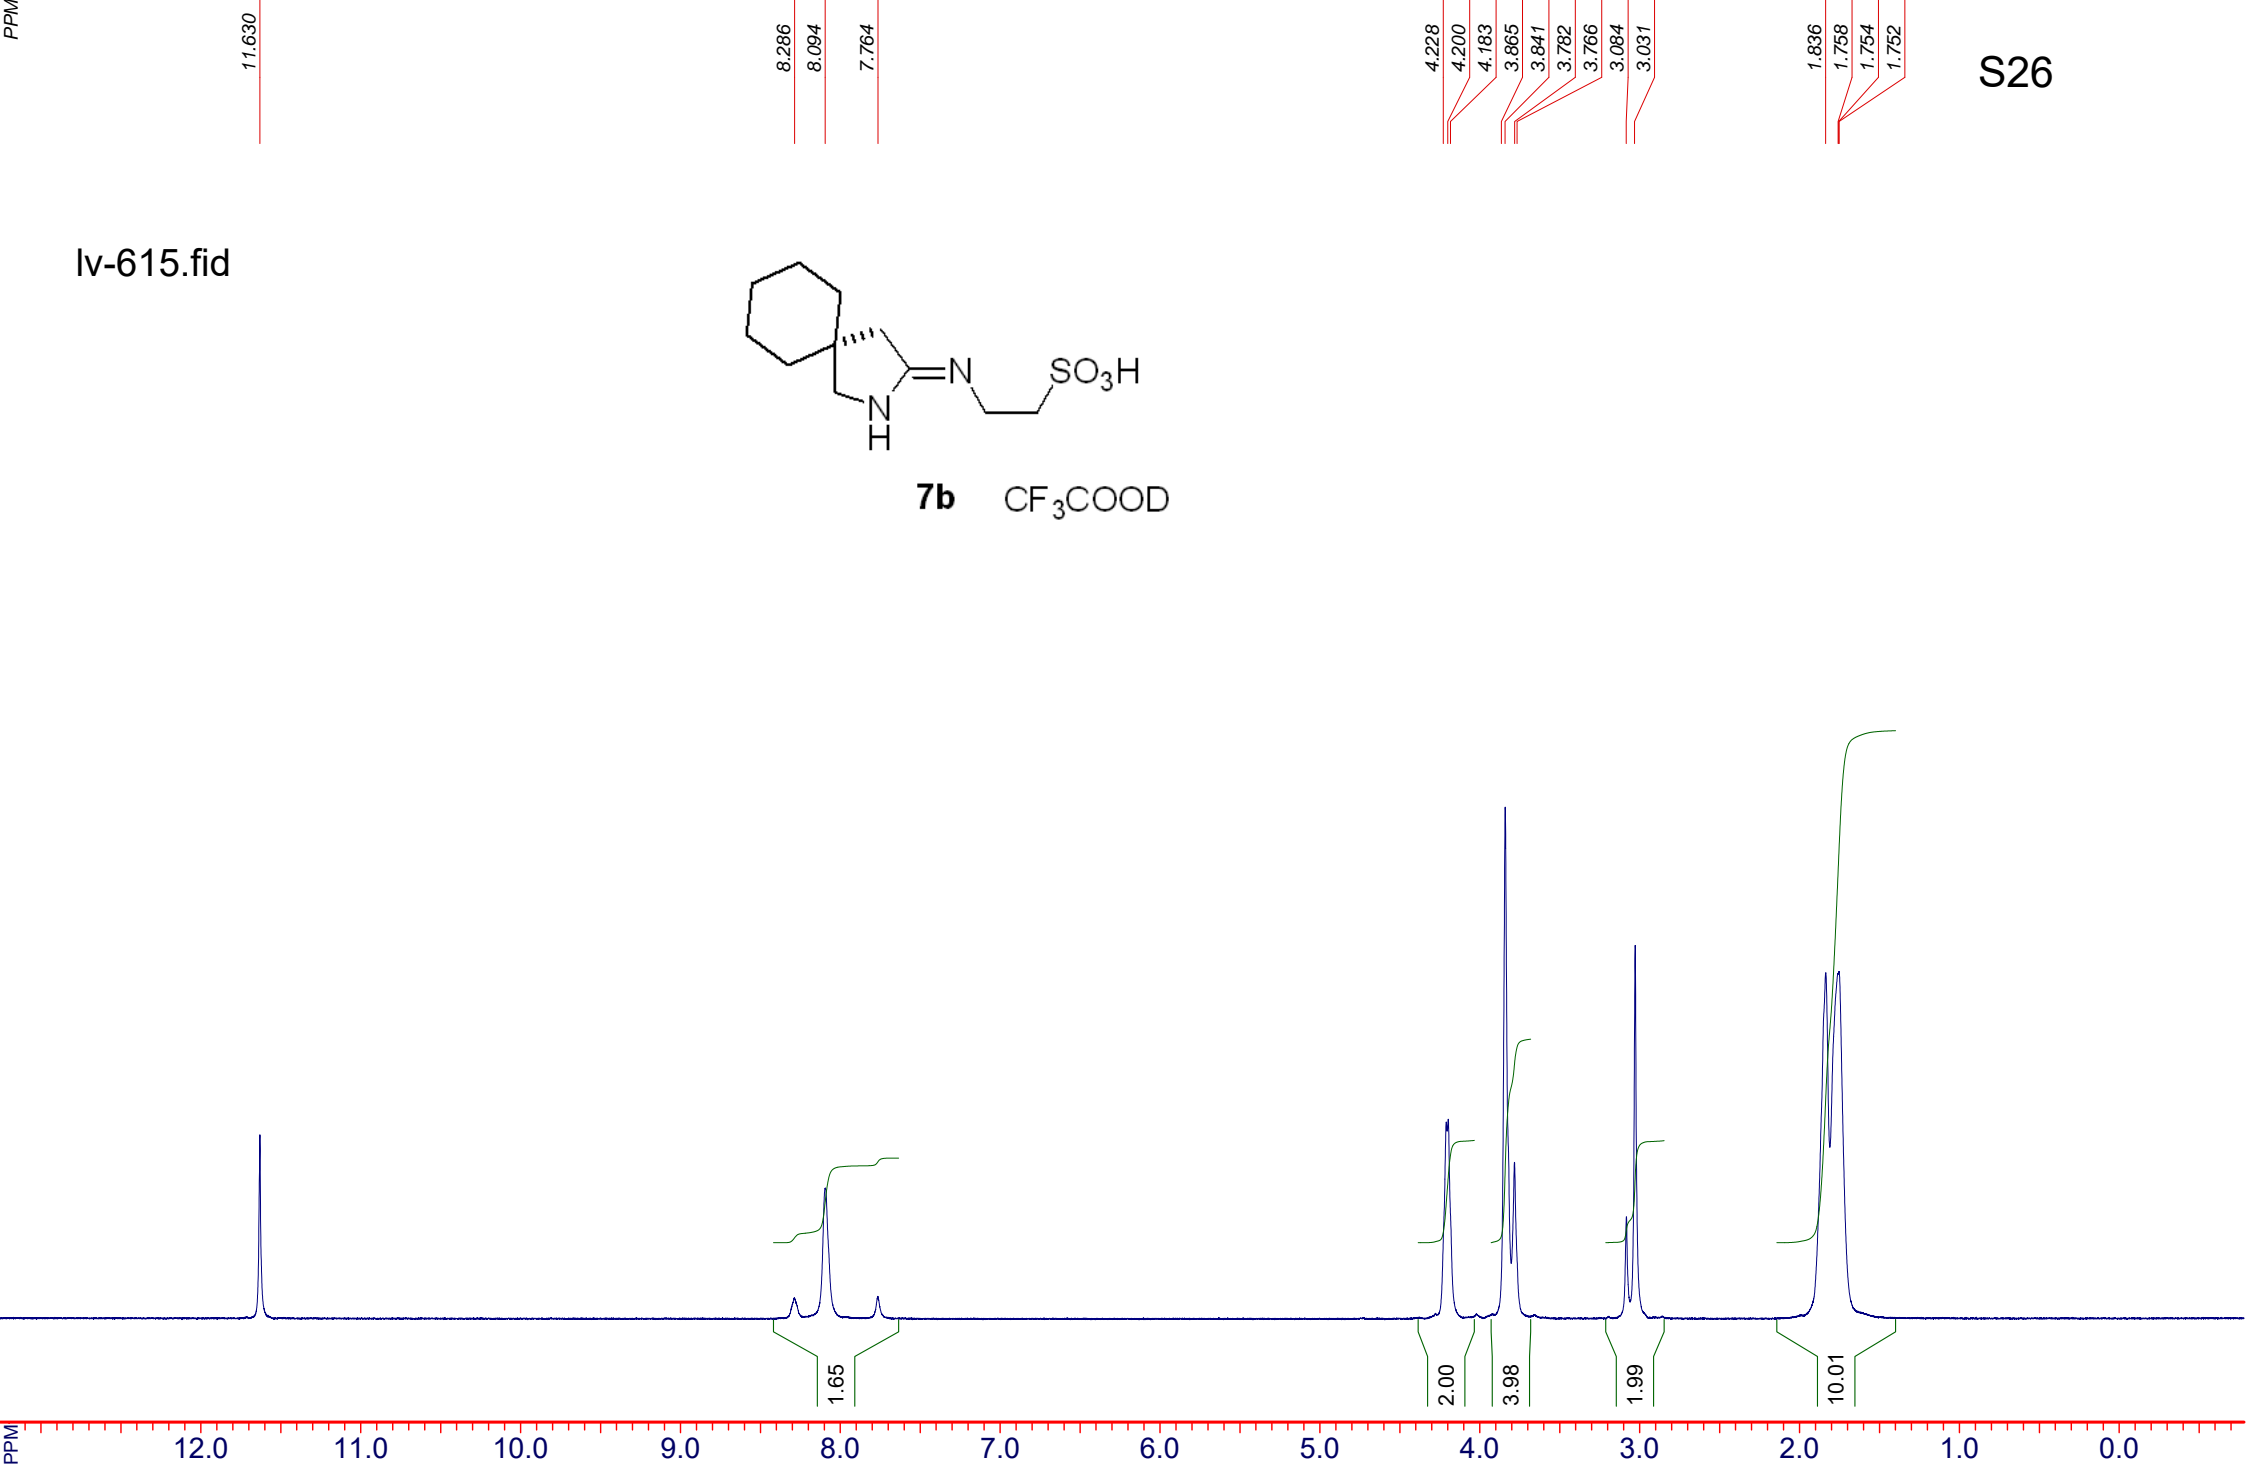

PPM

File name: lv-615.fid

Operator:

SF: 399.9697 MHz

NSC: 0

PW: 10.90 usec, RG: 10

SI: 32768

Date: 27-Dec-2022

Solvent: TFA

SW: 8000 Hz

TE: 298 K

AQ: 2.00 sec, RD: 0.00 sec

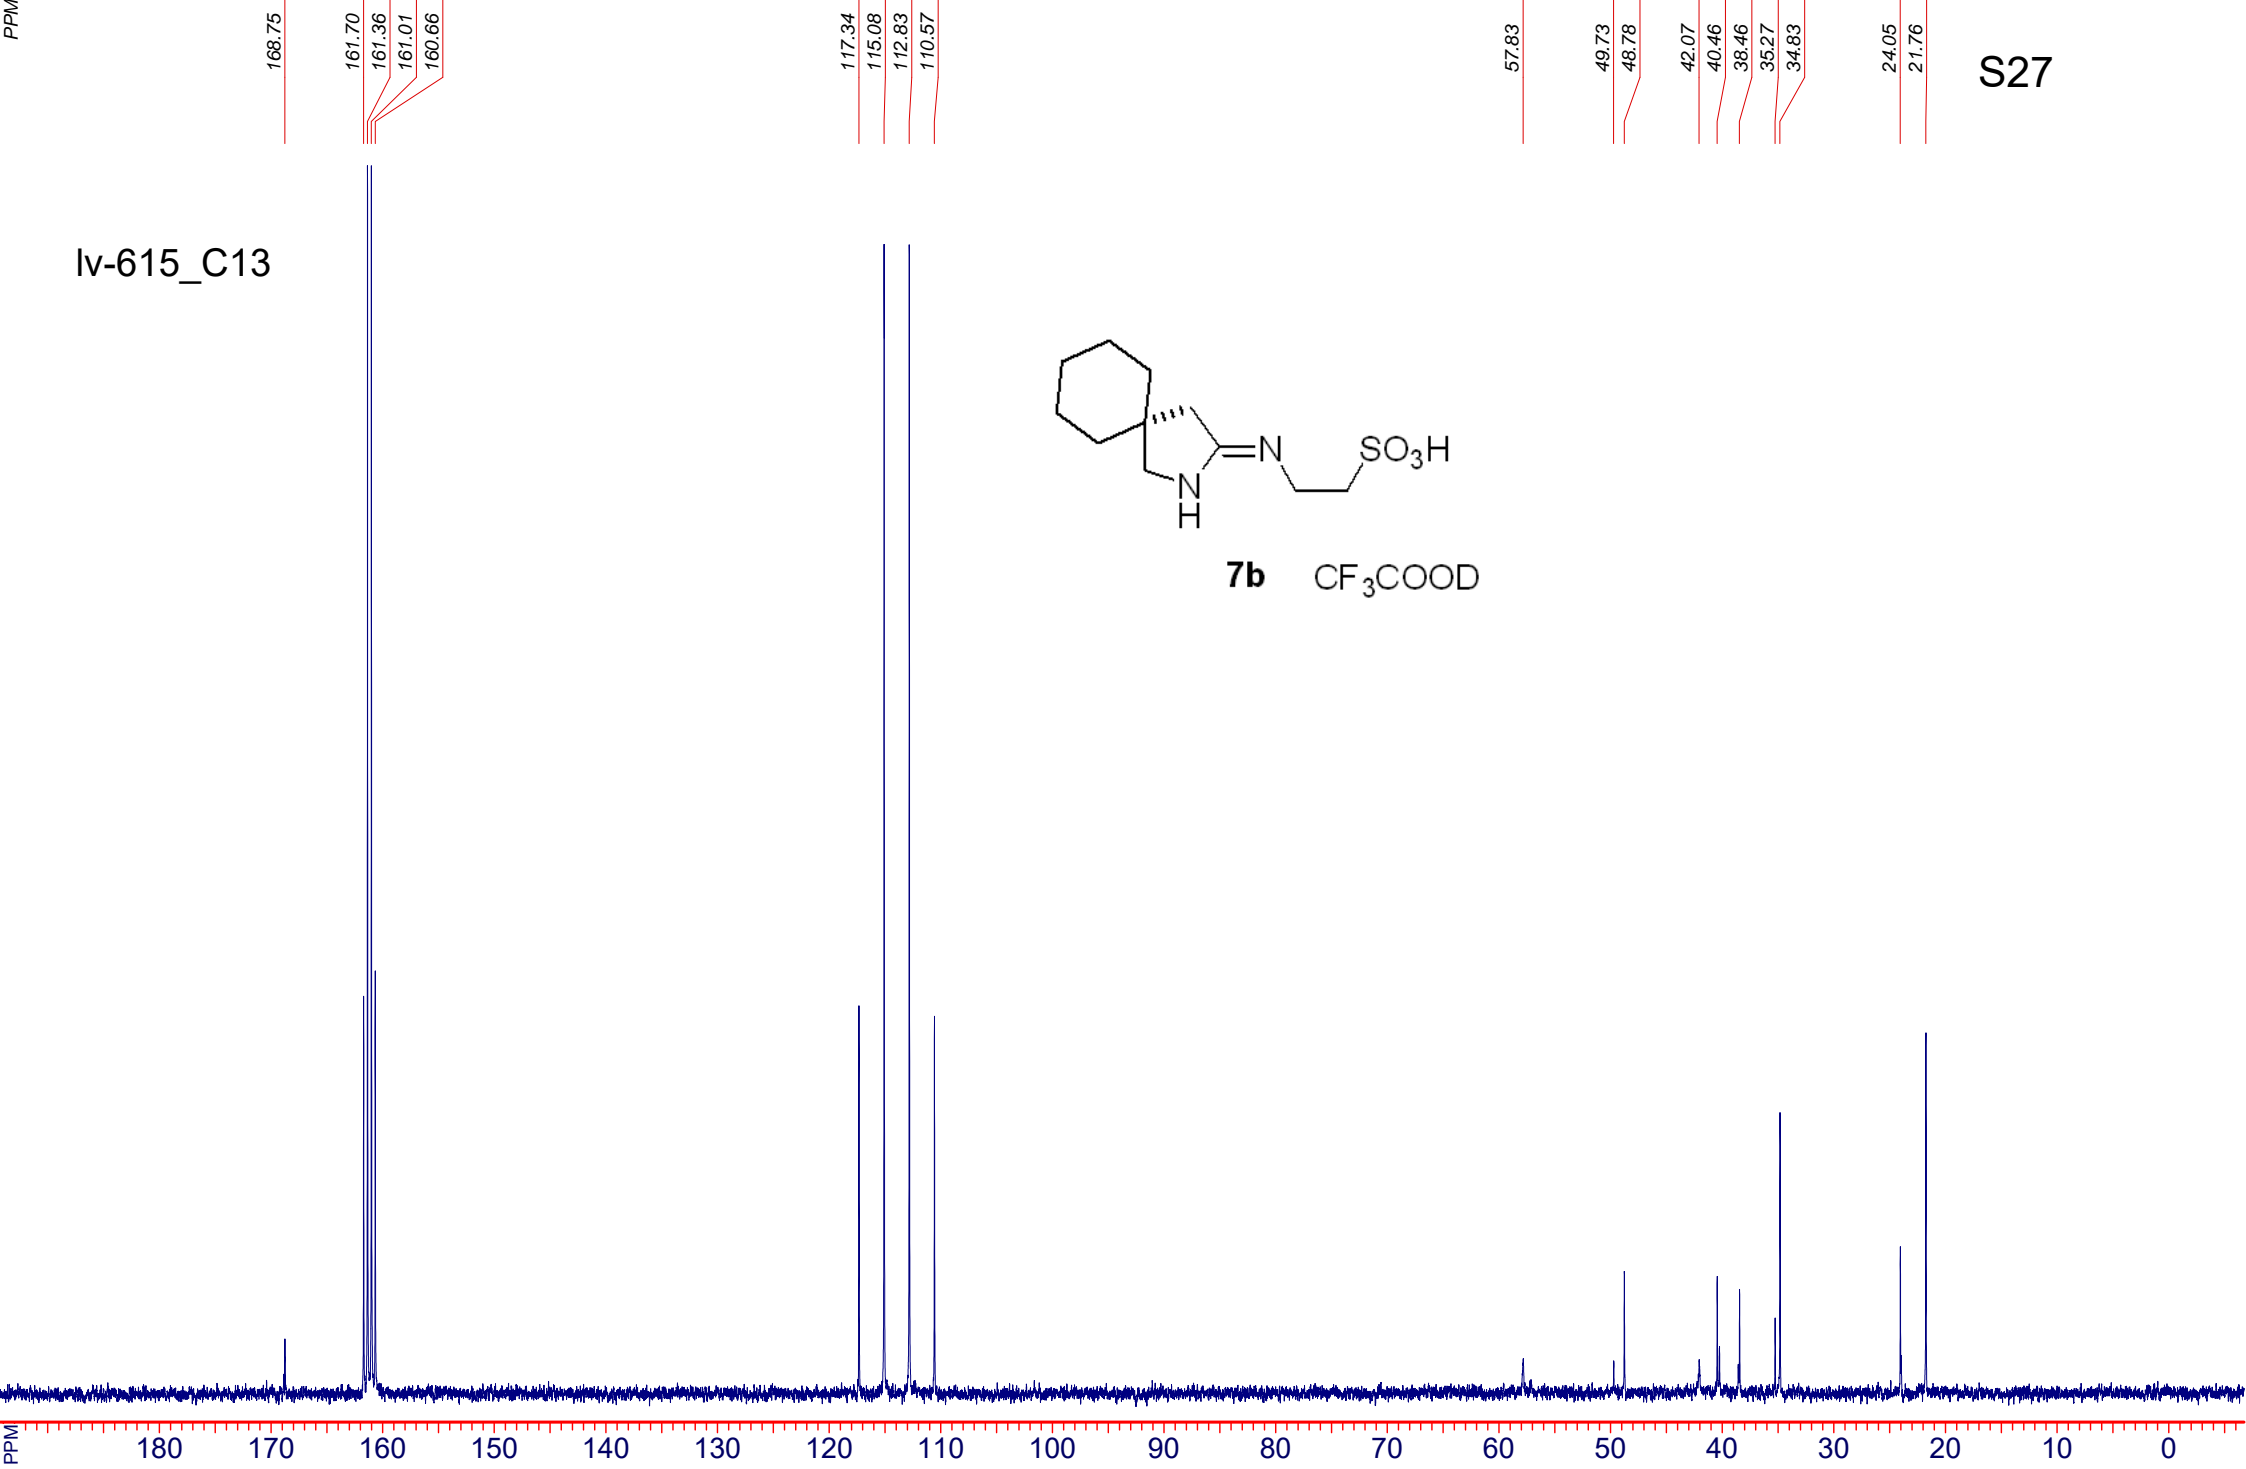

lv-615\_C13

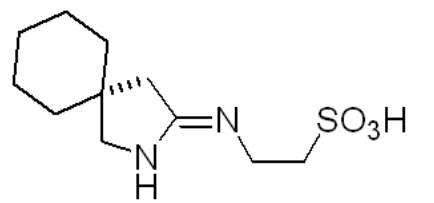

**7b** CF<sub>3</sub>COOD

S27

|                       |                |                  |           |                            |            |
|-----------------------|----------------|------------------|-----------|----------------------------|------------|
| File name: lv-615_C13 | Operator: root | SF: 125.6429 MHz | NSC: 97   | PW: 0.00 usec, RG: 51200   | SI: 131072 |
| Date: 28-Dec-2022     | Solvent: TFA   | SW: 32680 Hz     | TE: 683 K | AQ: 1.57 sec, RD: 0.00 sec |            |

PPM

S28

lv-18.fid

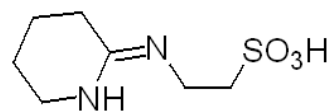**7c** D<sub>2</sub>O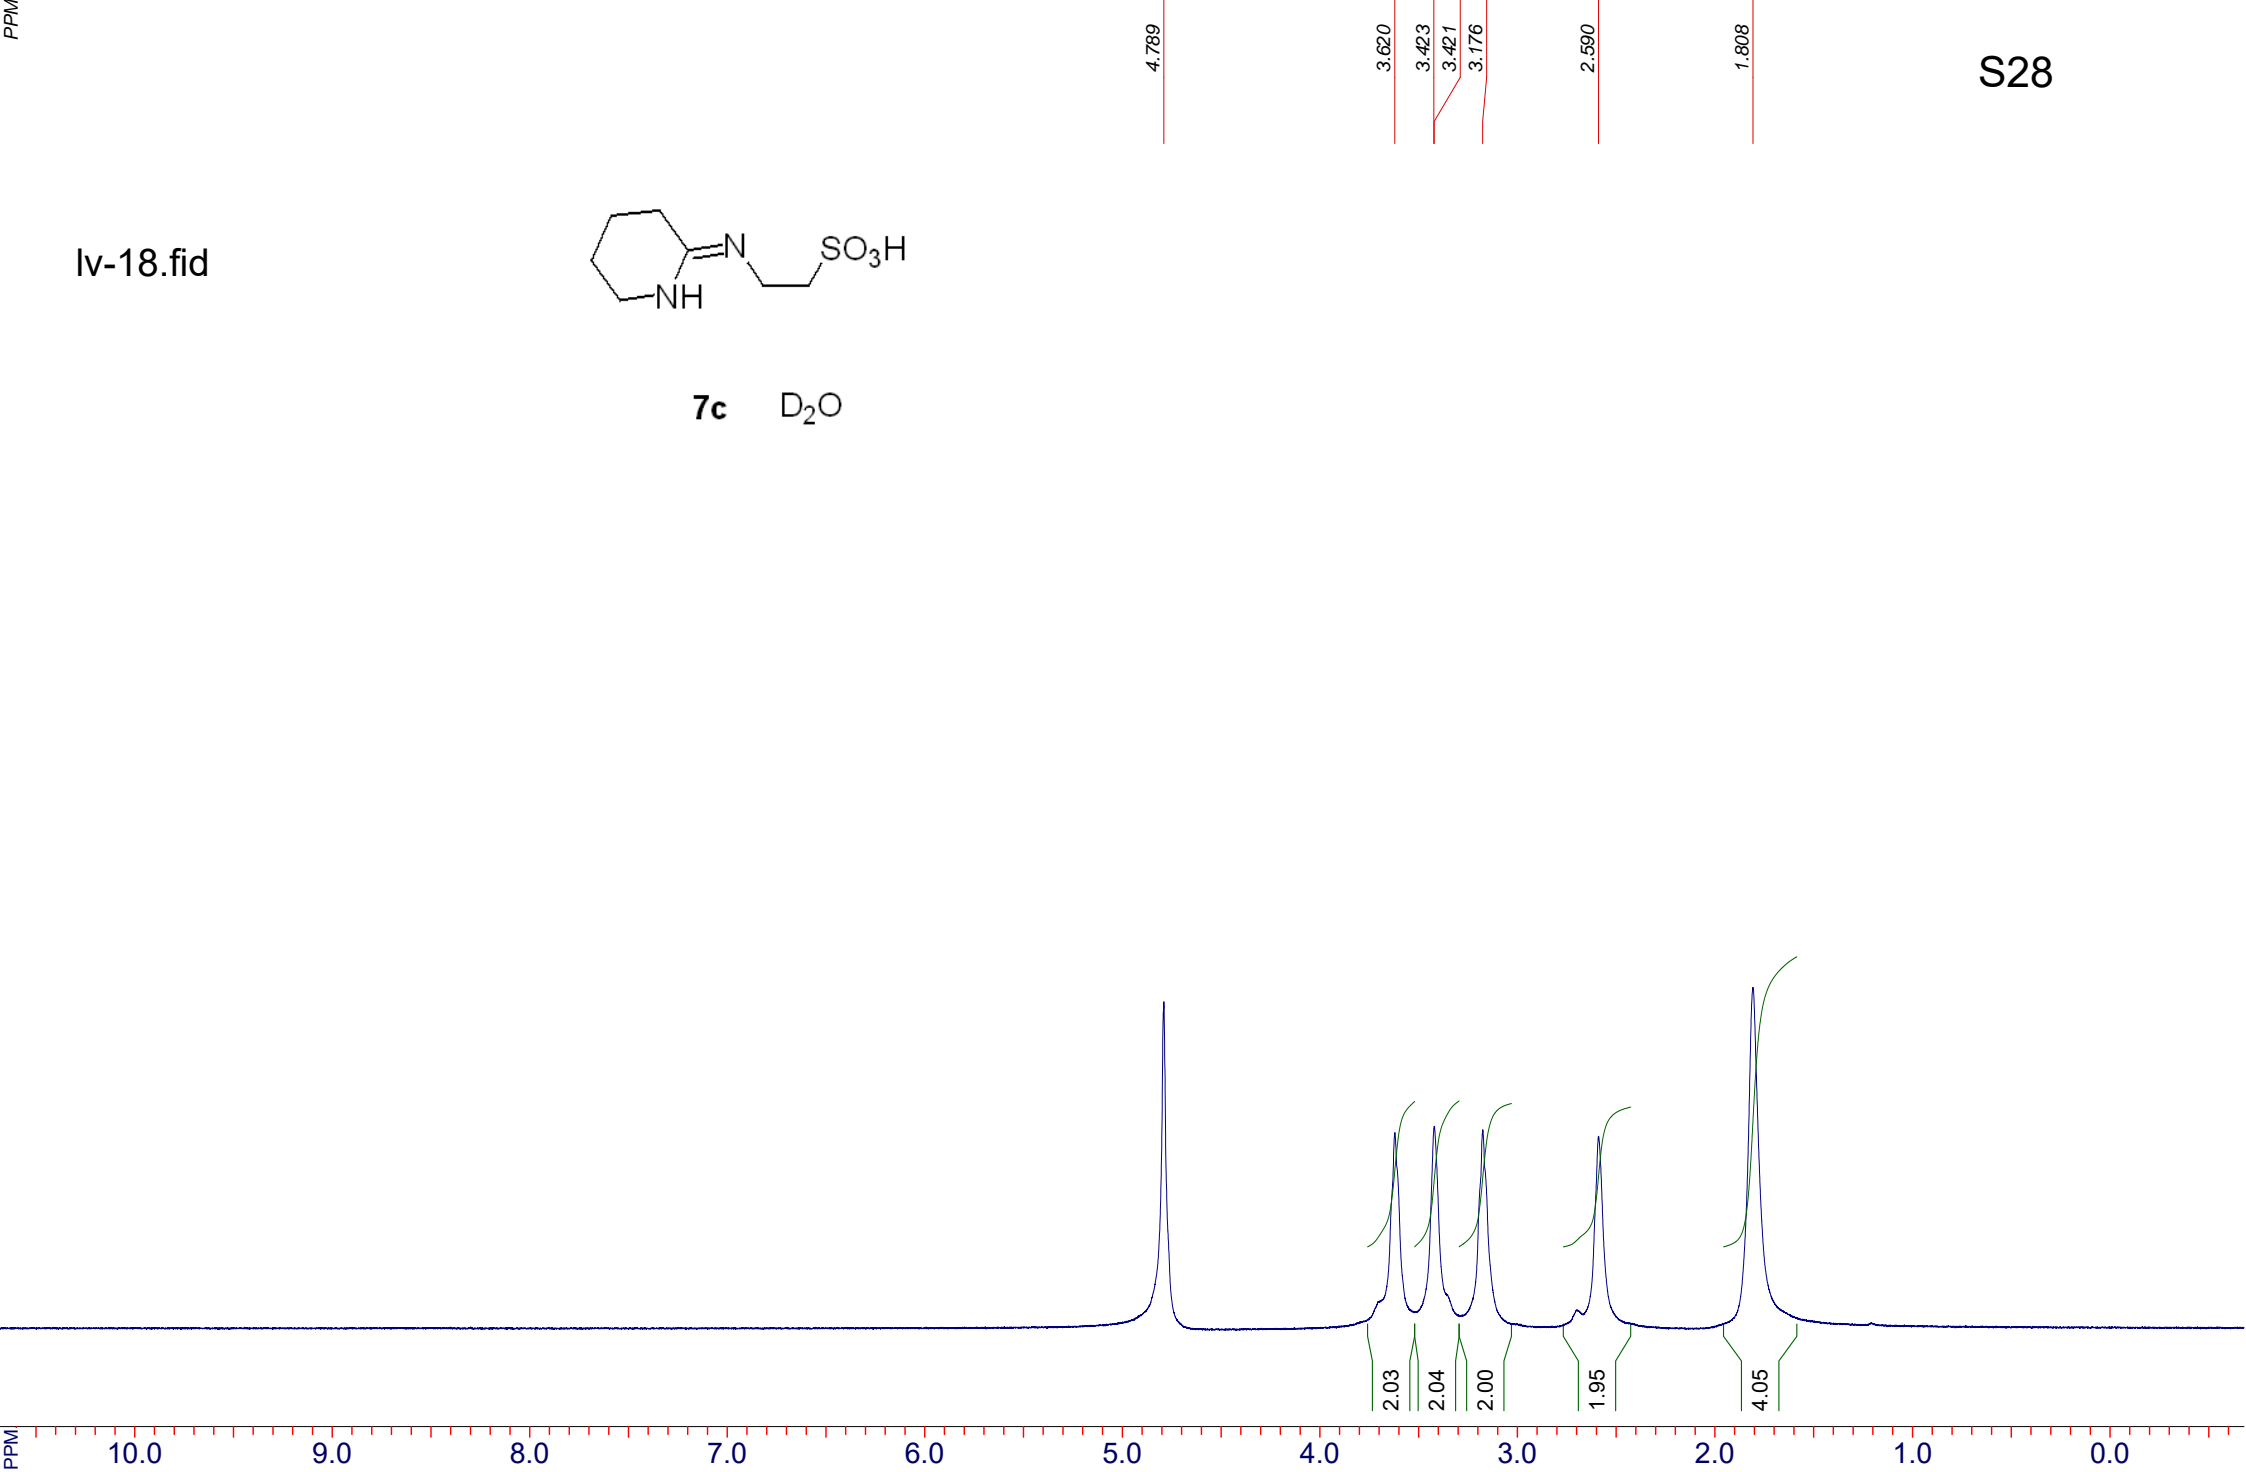

File name: lv-18.fid

Operator:

SF: 399.9724 MHz

NSC: 0

PW: 10.90 usec, RG: 10

SI: 32768

Date: 30-May-2022

Solvent: d2o

SW: 8000 Hz

TE: 298 K

AQ: 2.00 sec, RD: 0.00 sec

lv-18\_C13.fid

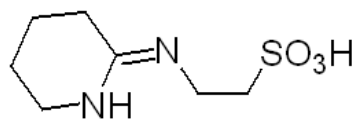**7c** D<sub>2</sub>O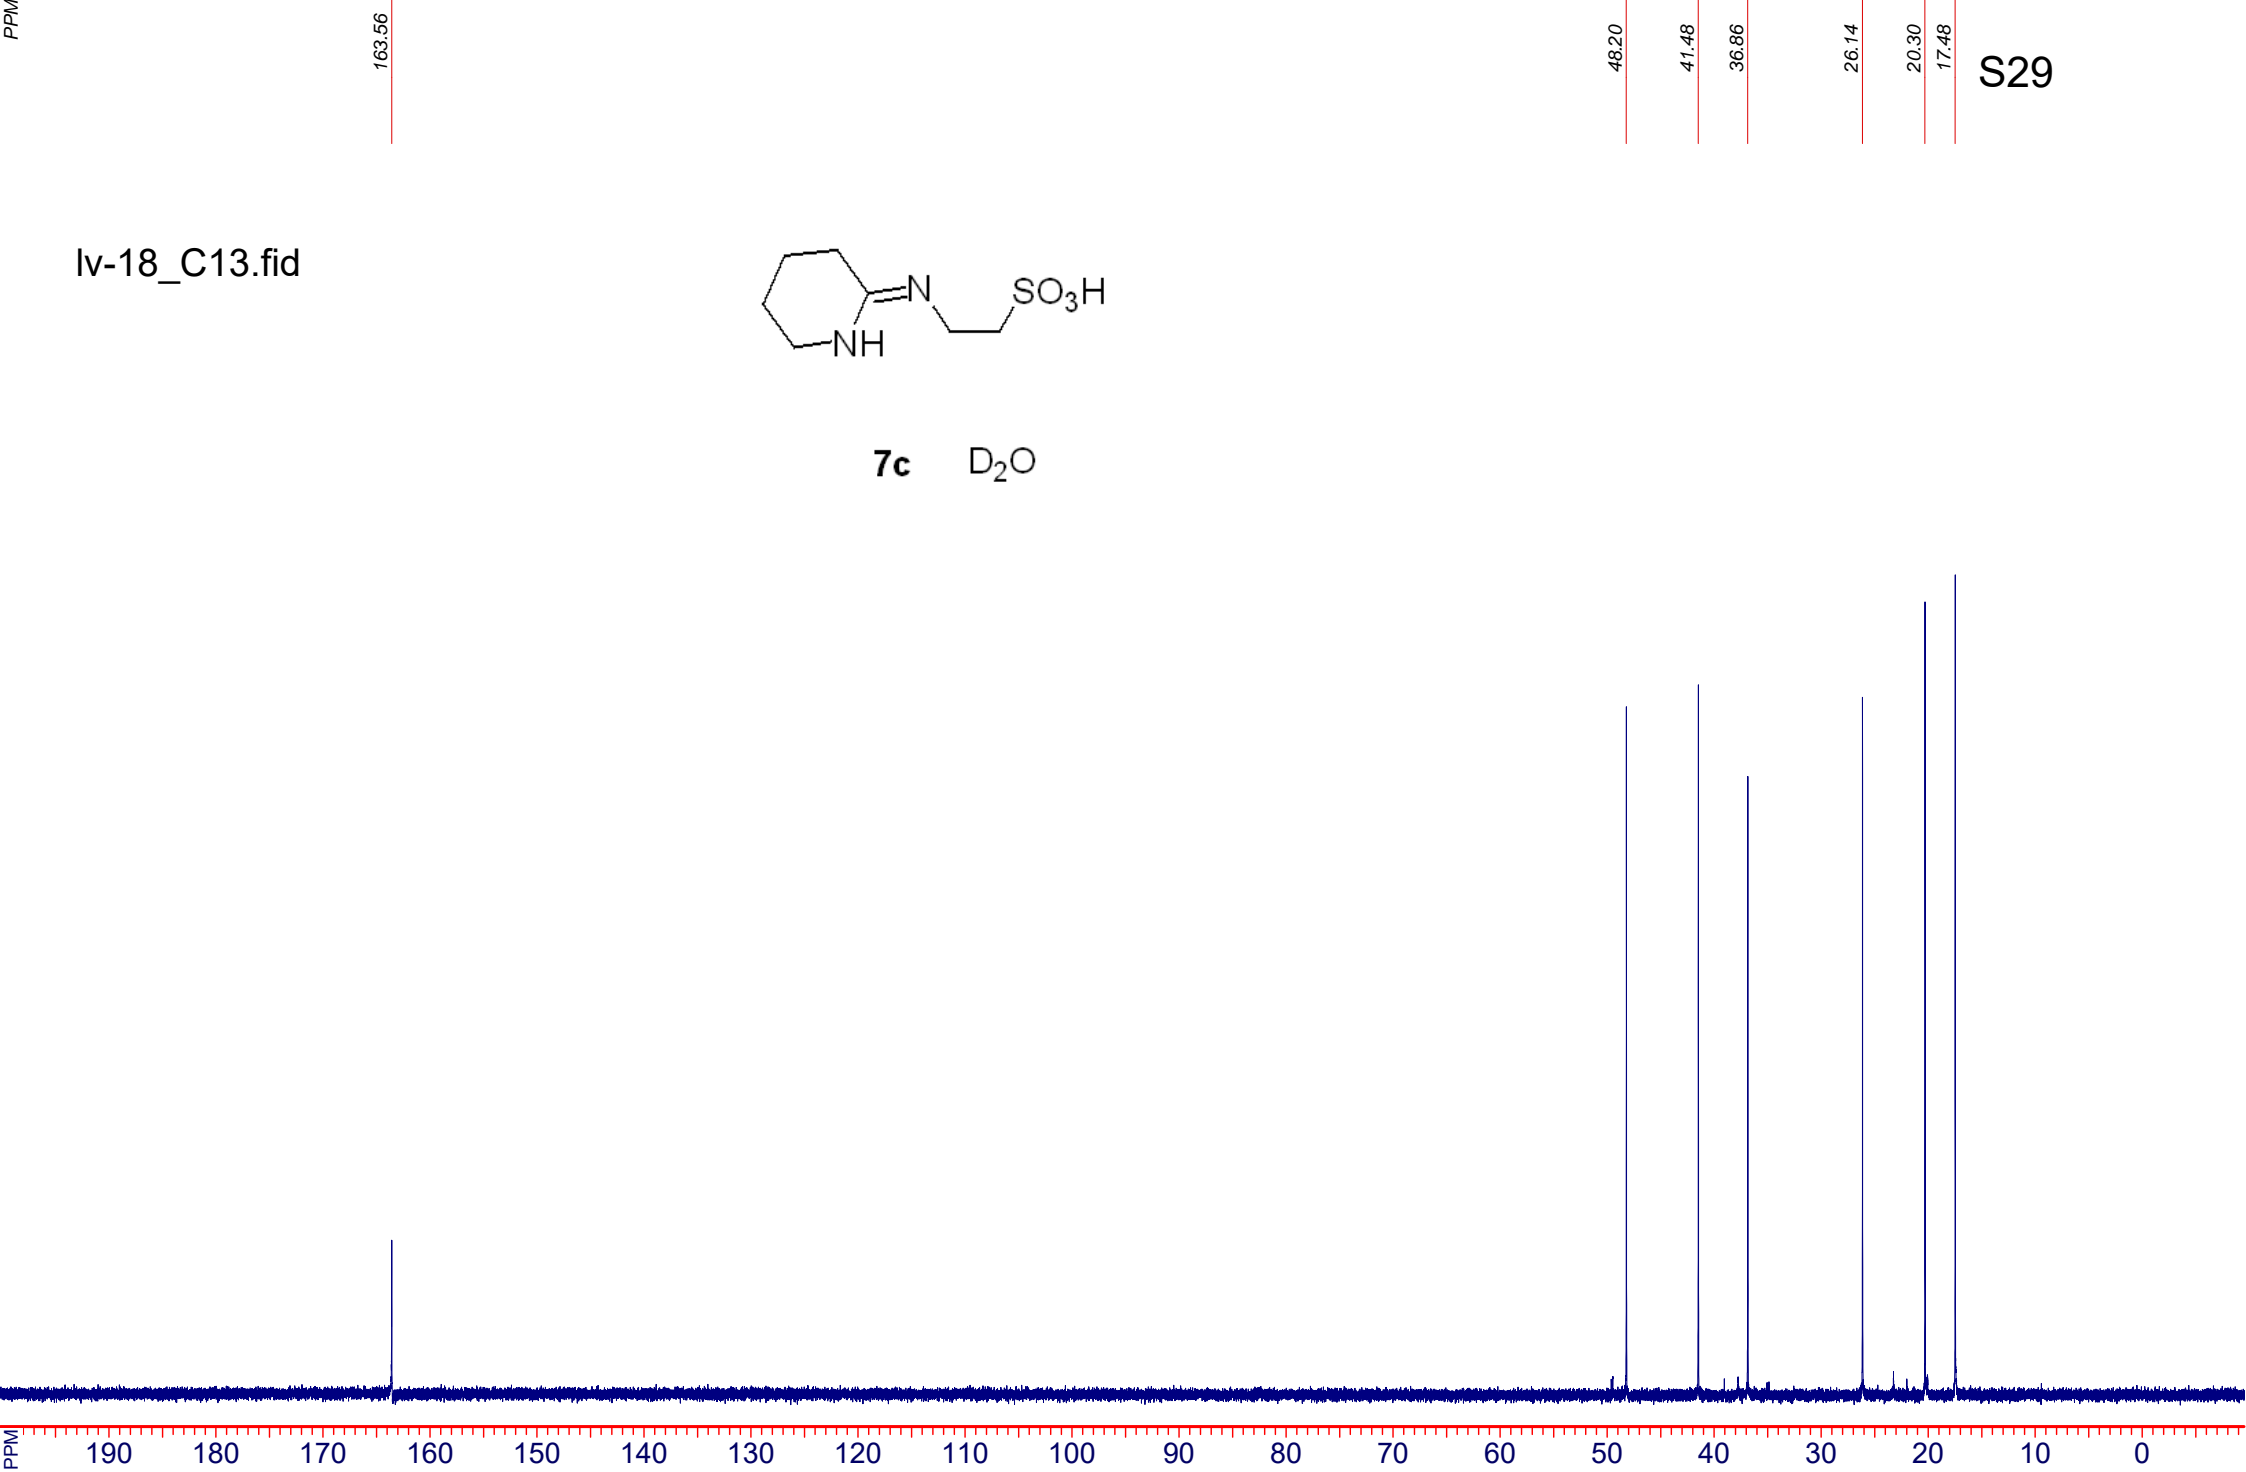

PPM

File name: lv-18\_C13.fid

Operator:

SF: 150.8301 MHz

NSC: 0

PW: 3.09 usec, RG: 60

SI: 65536

Date: 02-Jun-2022

Solvent: d2o

SW: 37879 Hz

TE: 298 K

AQ: 0.87 sec, RD: 0.00 sec

PPM

163.55

48.19

41.47

36.84

26.13

20.29

17.47

lv-18\_C13APT.fid

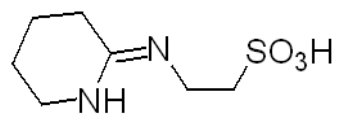**7c** D<sub>2</sub>O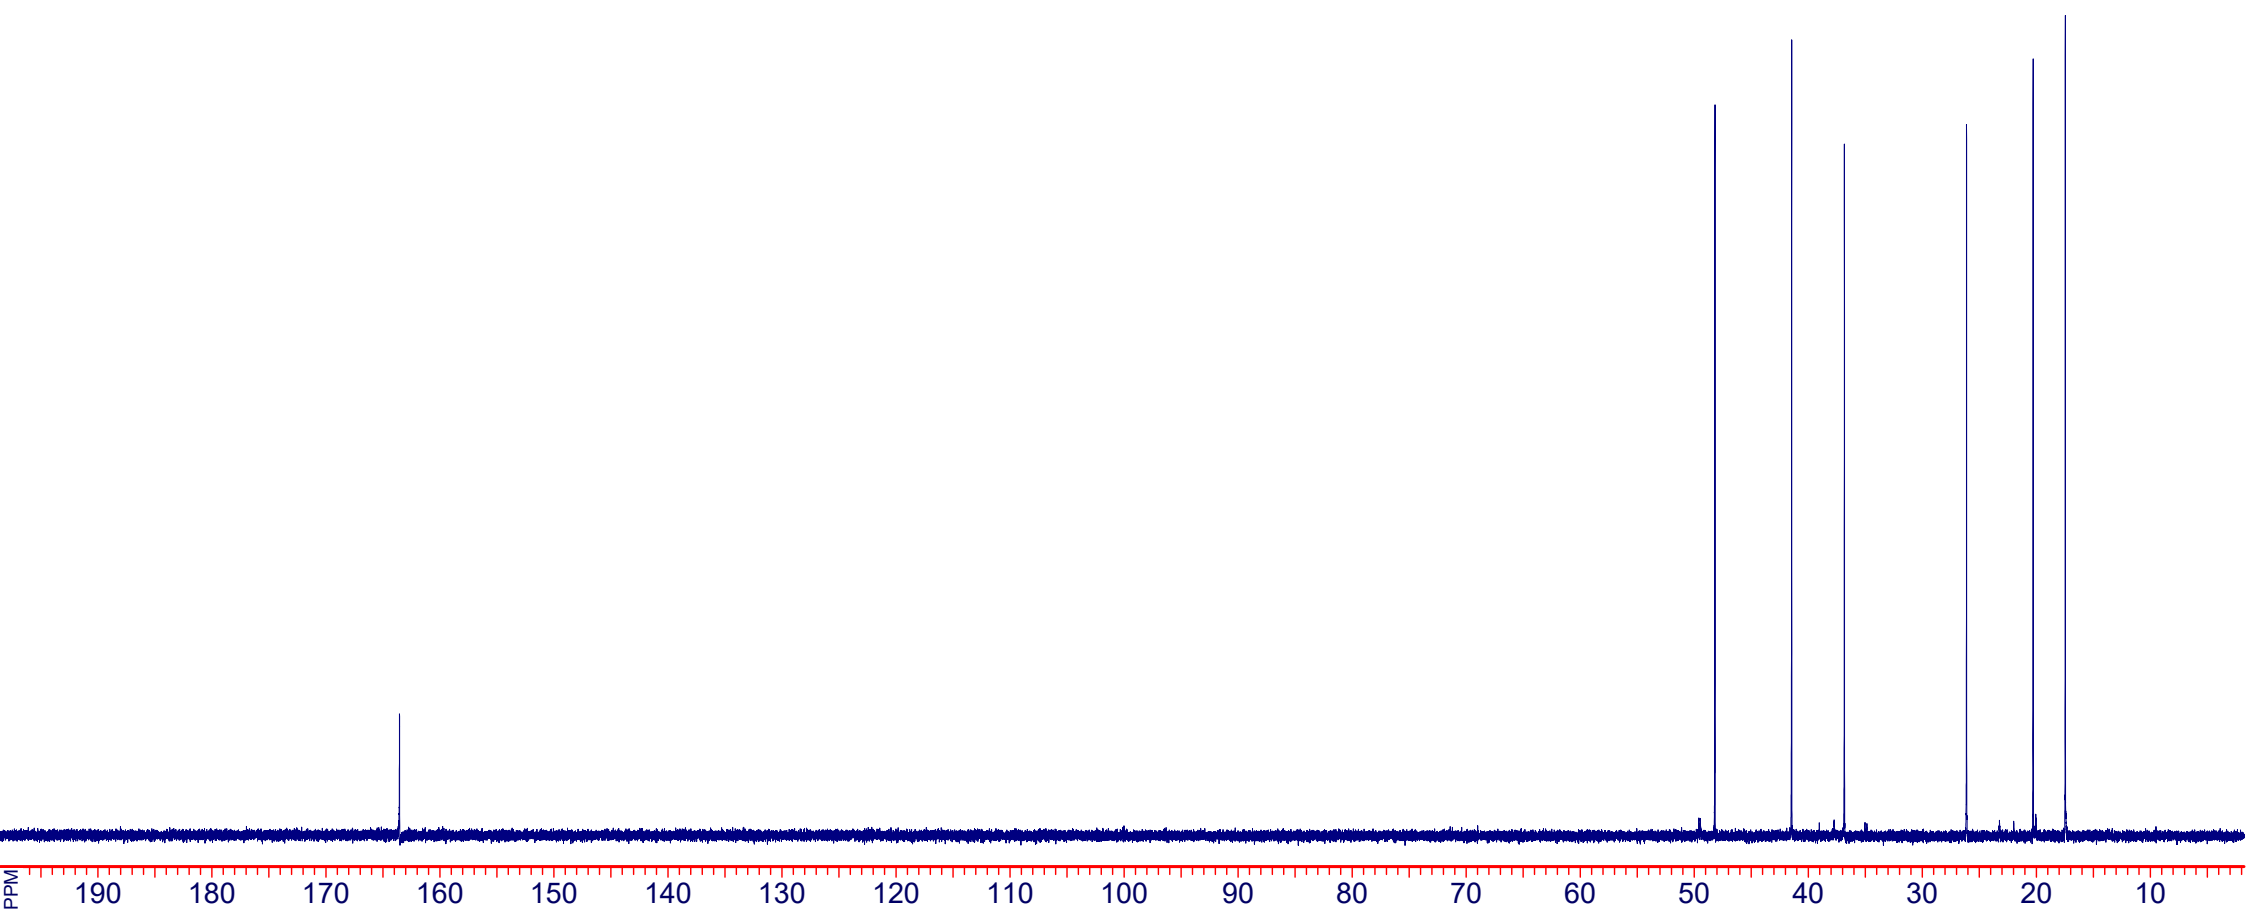

File name: lv-18\_C13APT.fid

Operator:

SF: 150.8329 MHz

NSC: 0

PW: 4.63 usec, RG: 60

SI: 131072

Date: 02-Jun-2022

Solvent: d2o

SW: 39063 Hz

TE: 298 K

AQ: 0.87 sec, RD: 0.00 sec



lv-20

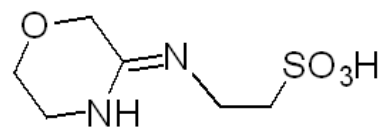**7d** D<sub>2</sub>O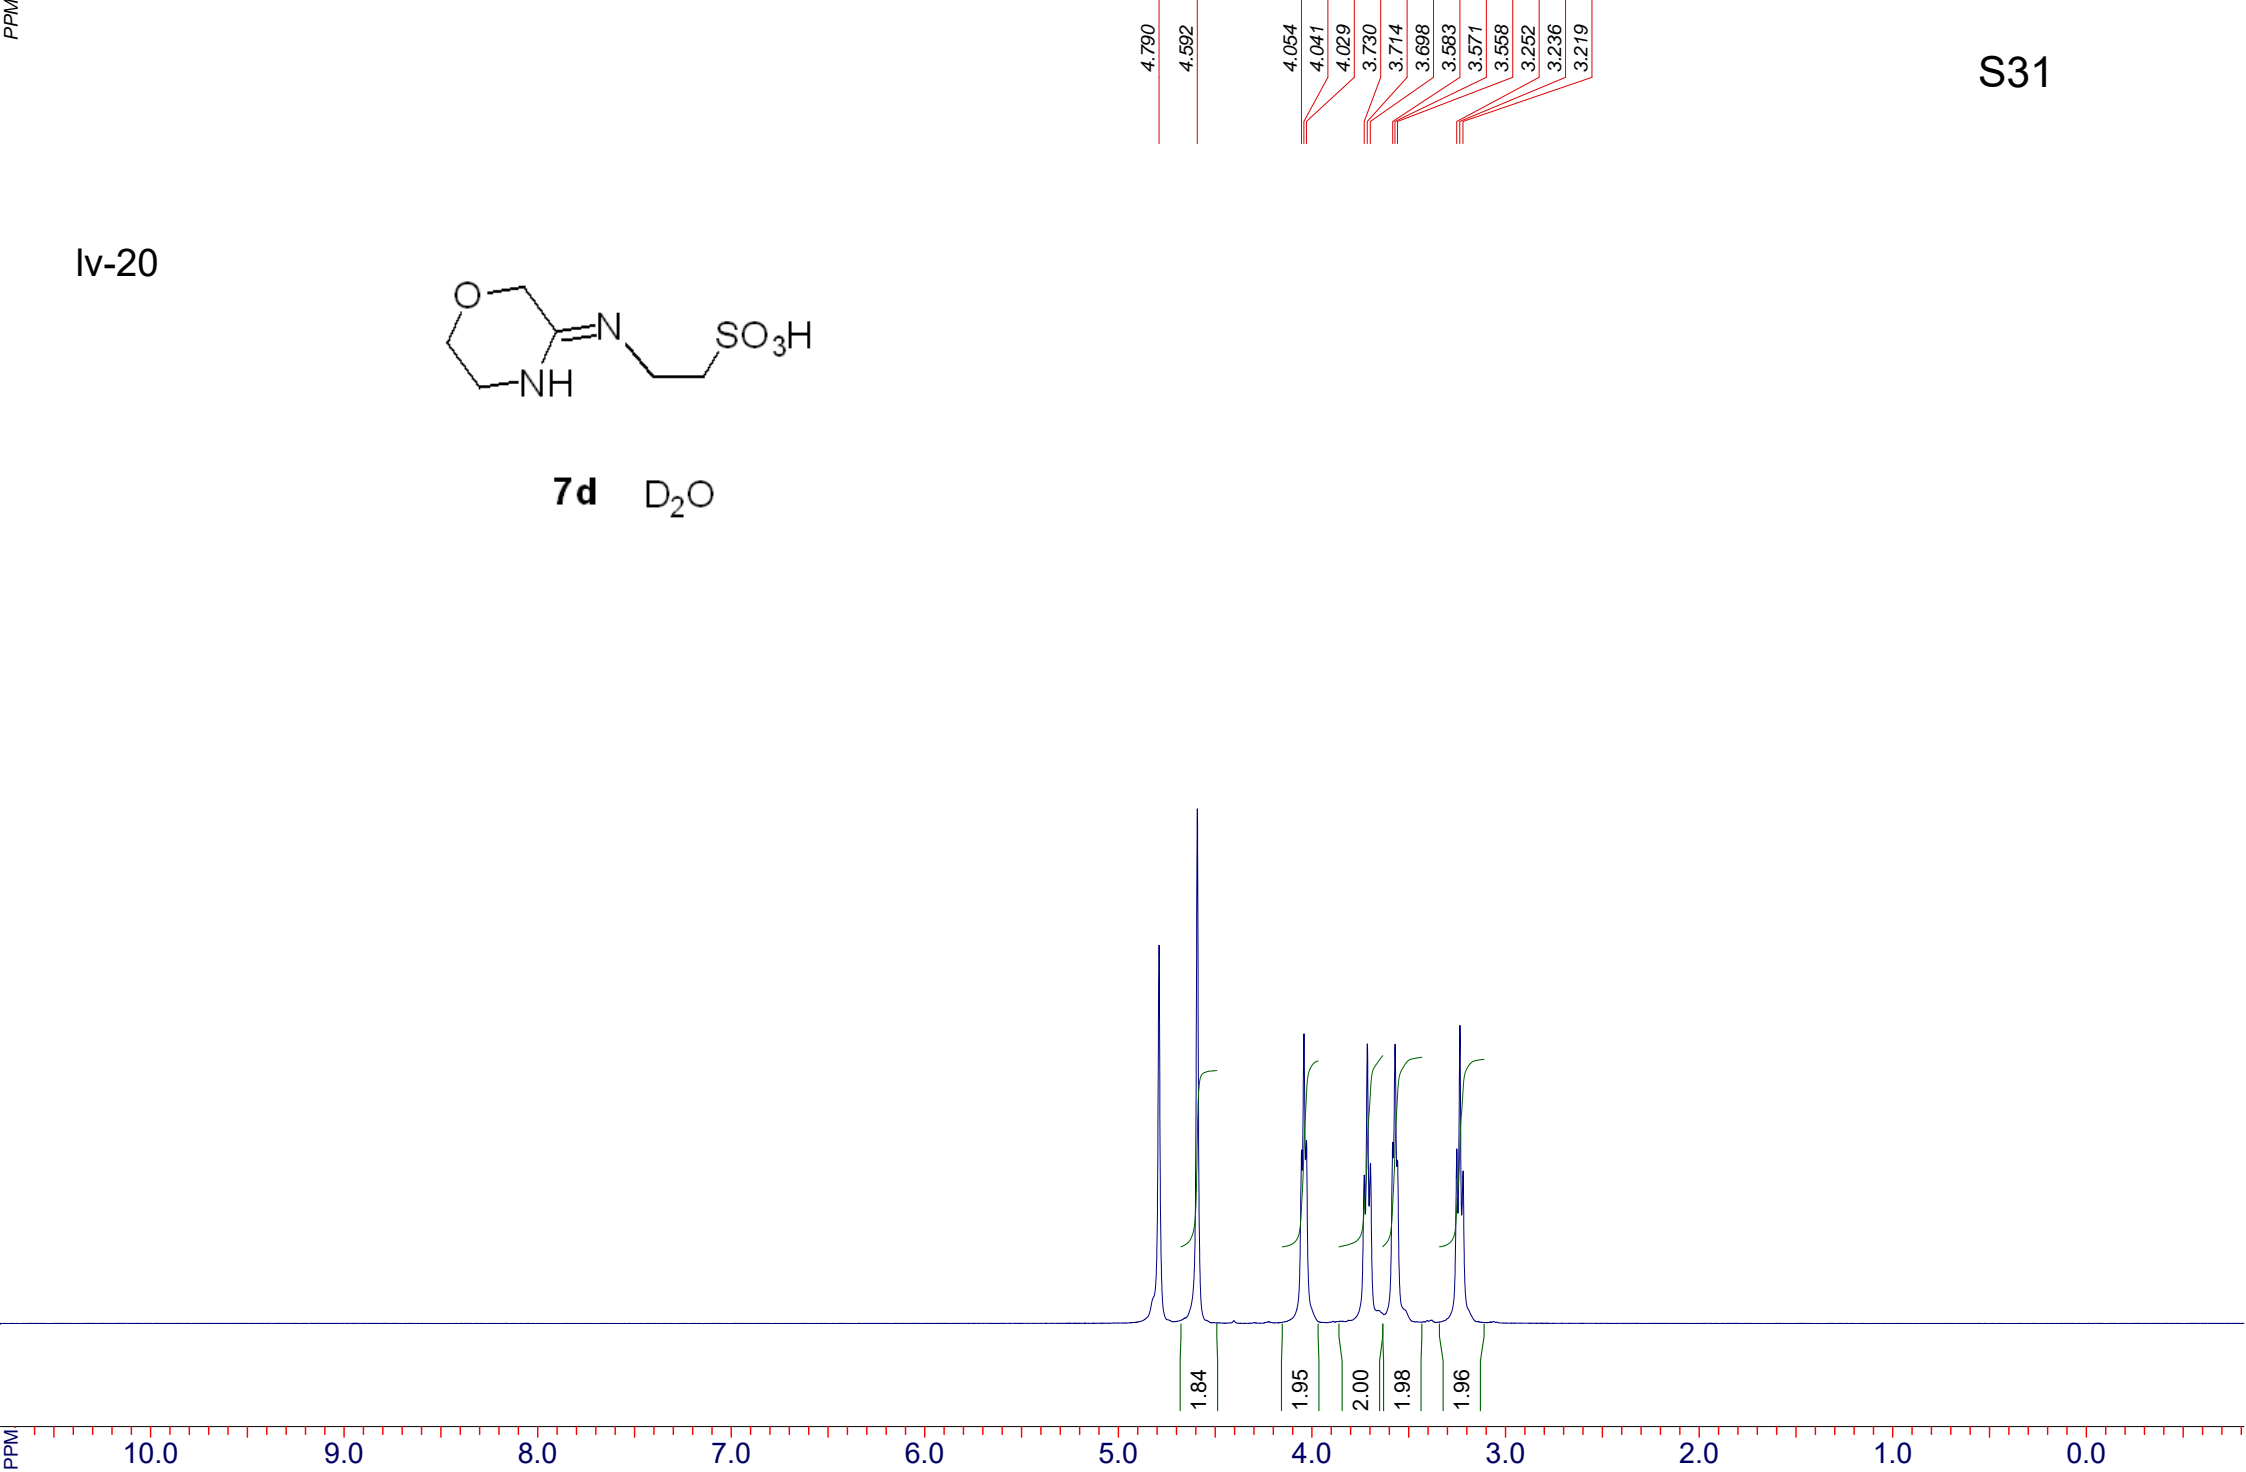

PPM

10.0

9.0

8.0

7.0

6.0

5.0

4.0

3.0

2.0

1.0

0.0

File name: lv-20

Operator: nmr

SF: 400.1300 MHz

NSC: 1

PW: 0.00 usec, RG: 22

SI: 32768

Date: 08-Jun-2022

Solvent: D2O

SW: 8224 Hz

TE: 300 K

AQ: 1.99 sec, RD: 0.00 sec

160.44

63.09  
63.01

48.08

39.60  
37.16

S32

lv-20\_C13

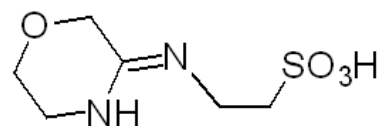**7d** D<sub>2</sub>O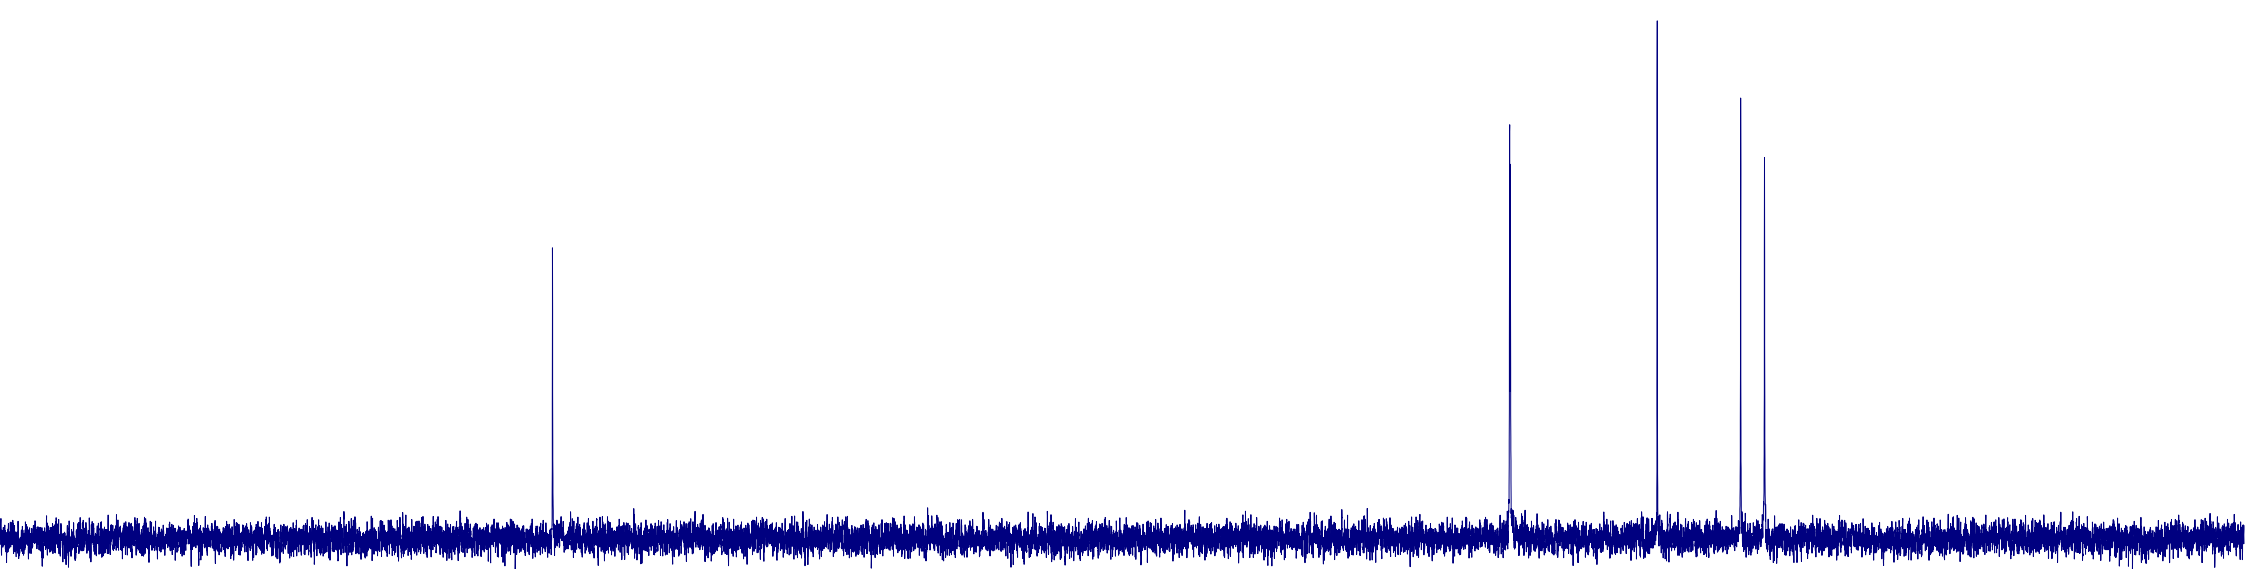

PPM 200 180 160 140 120 100 80 60 40 20 0

File name: lv-20\_C13

Operator: nmr

SF: 100.6128 MHz

NSC: 175

PW: 0.00 usec, RG: 2050

SI: 32768

Date: 08-Jun-2022

Solvent: D2O

SW: 26042 Hz

TE: 300 K

AQ: 1.26 sec, RD: 0.00 sec

lv-20\_C13APT

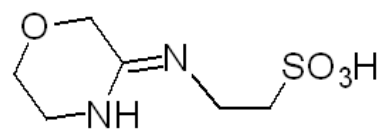**7d** D<sub>2</sub>O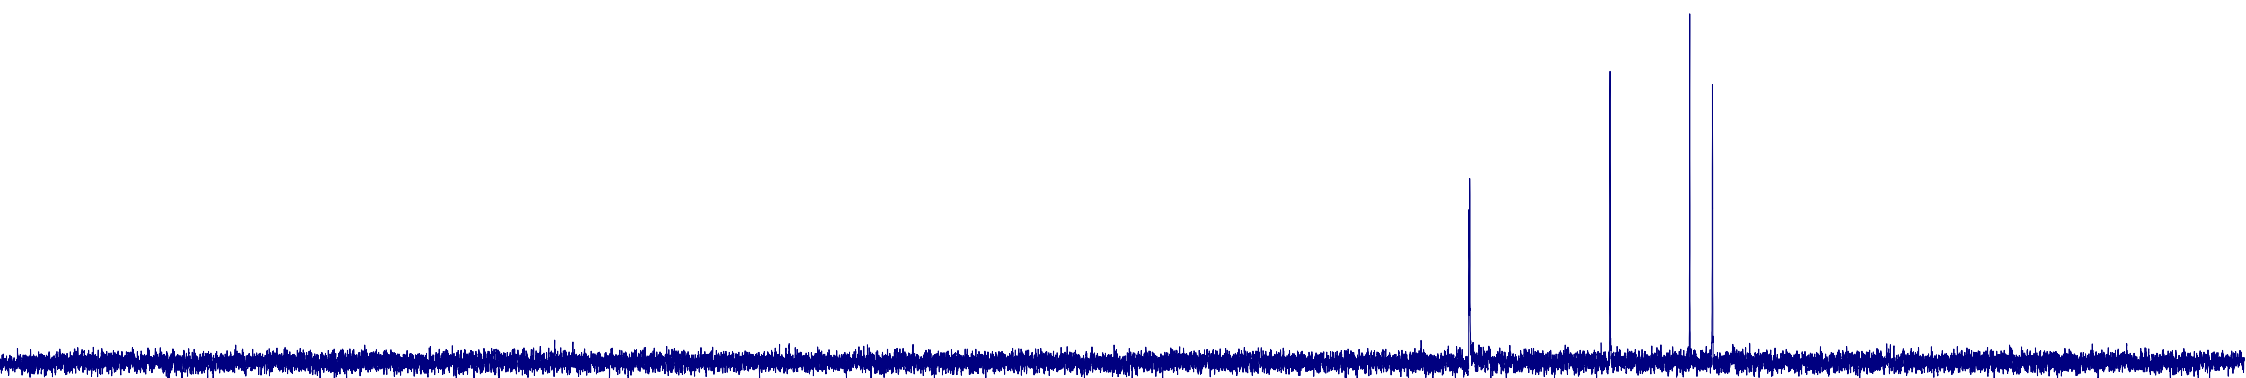

PPM 200 180 160 140 120 100 80 60 40 20 0

File name: lv-20\_C13APT

Operator: nmr

SF: 100.6128 MHz

NSC: 1326

PW: 0.00 usec, RG: 2050

SI: 65536

Date: 09-Jun-2022

Solvent: D2O

SW: 24038 Hz

TE: 300 K

AQ: 1.06 sec, RD: 0.00 sec

lv-488.fid

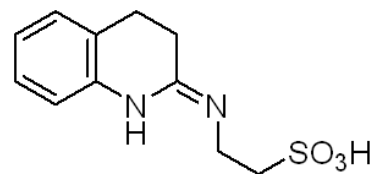**7e** CF<sub>3</sub>COOD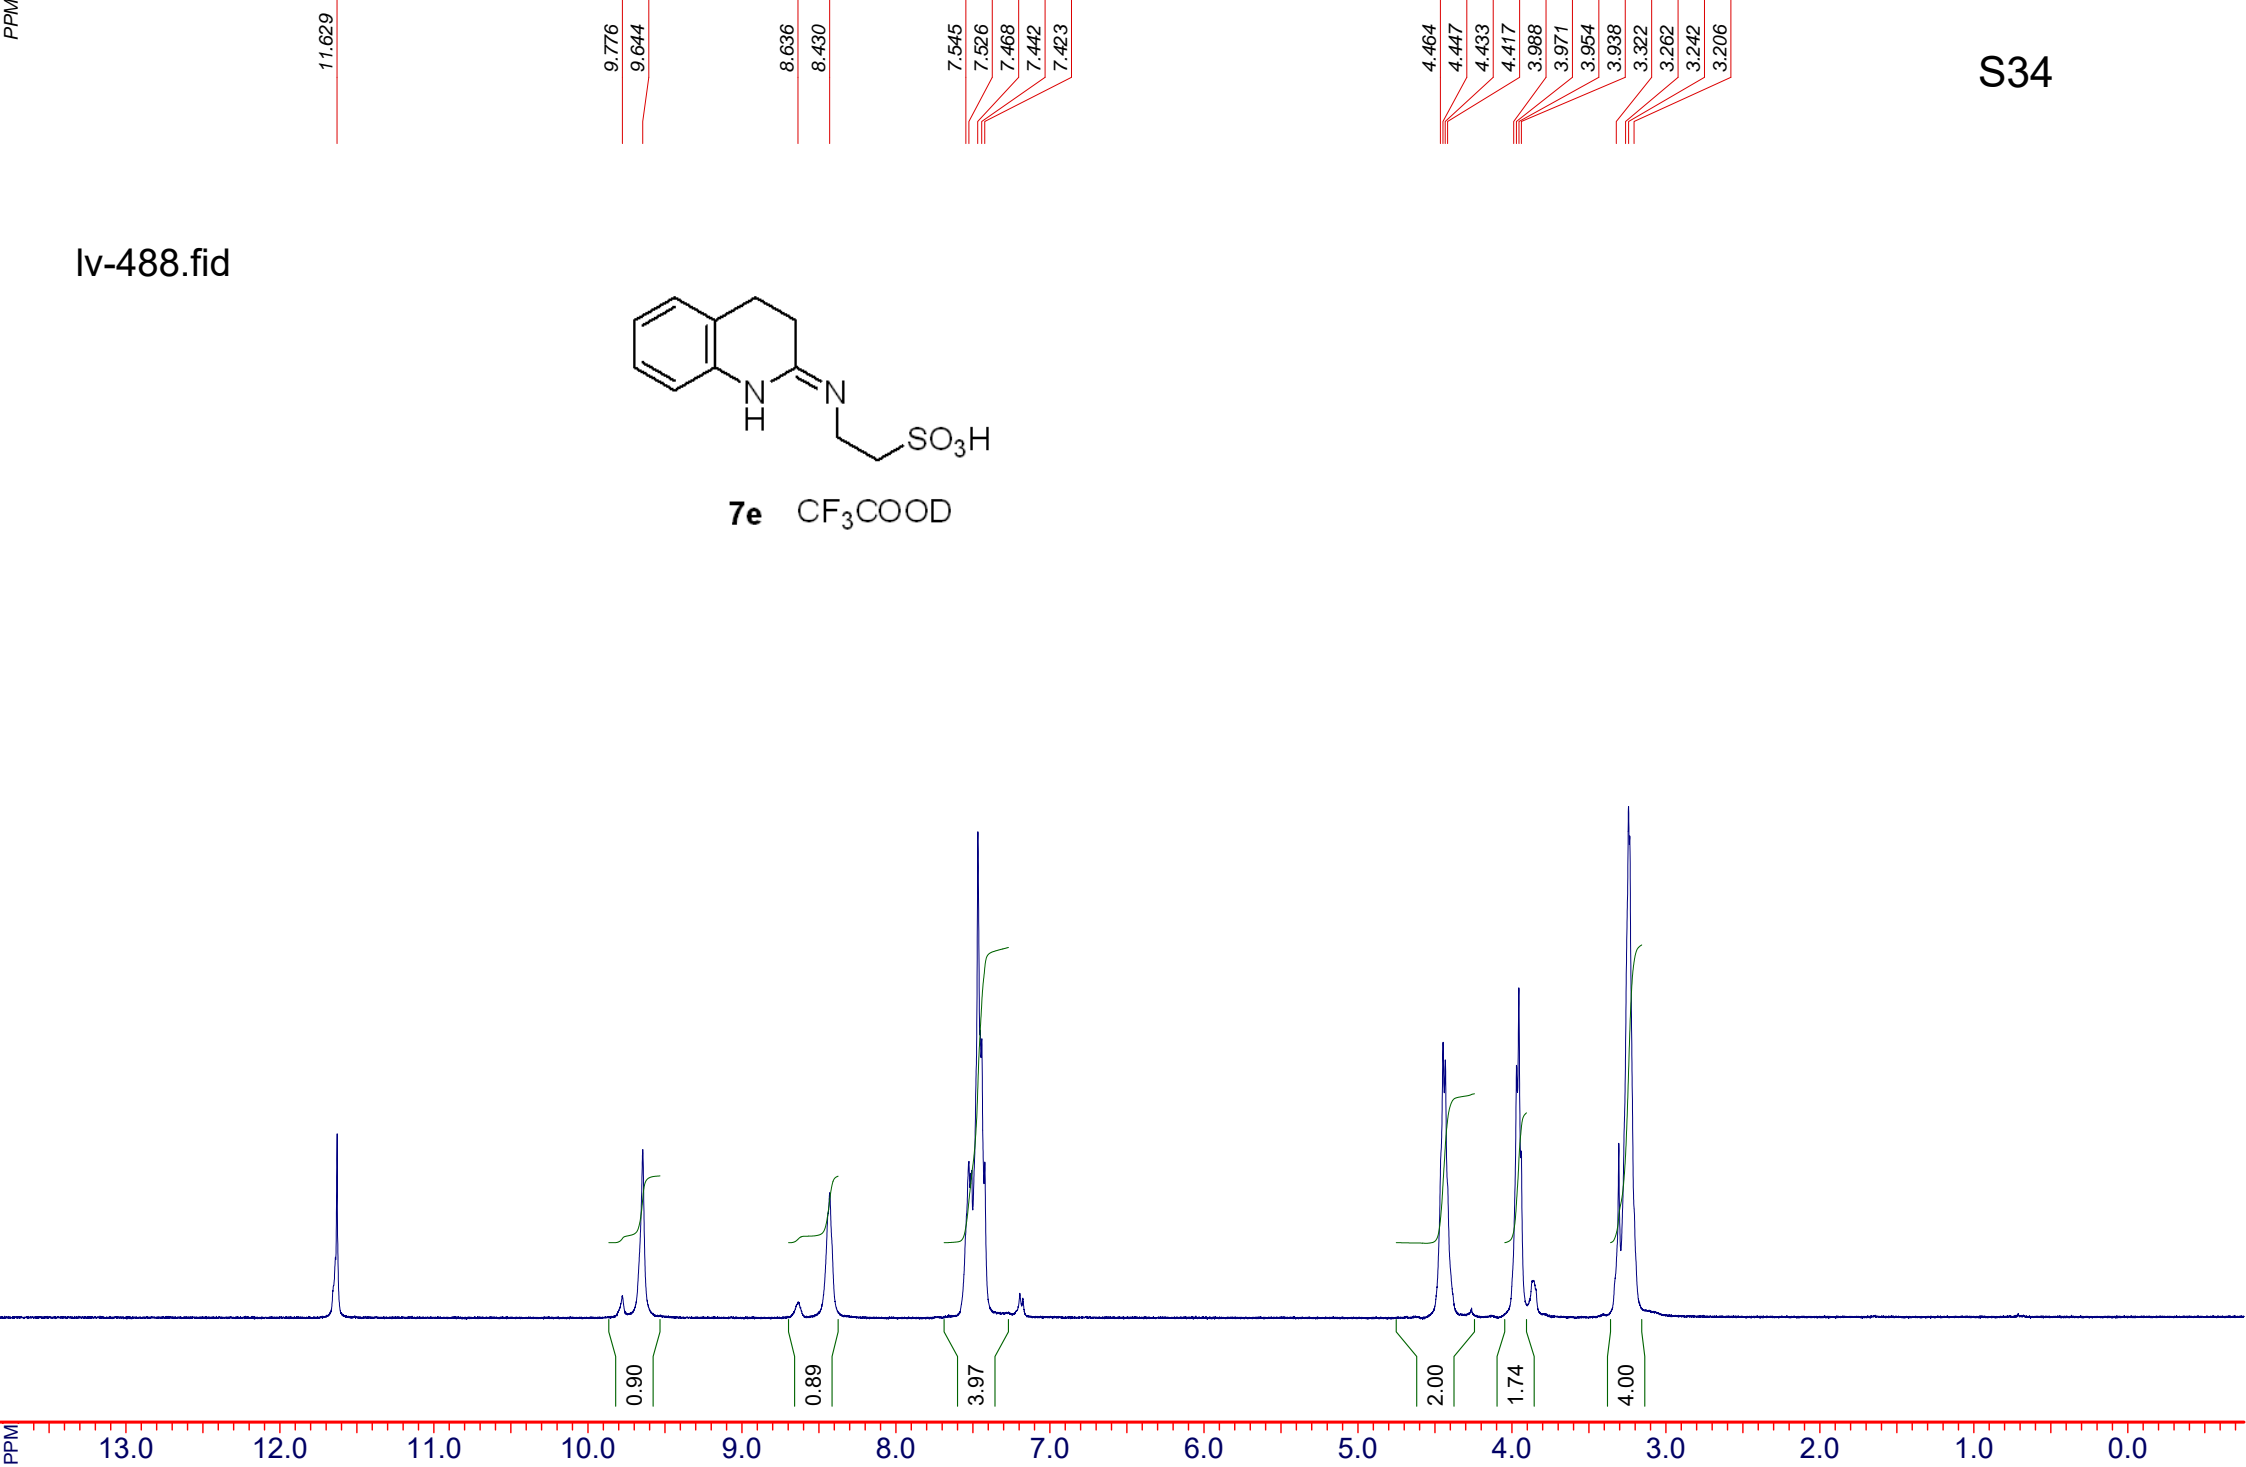

PPM

13.0 12.0 11.0 10.0 9.0 8.0 7.0 6.0 5.0 4.0 3.0 2.0 1.0 0.0

File name: lv-488.fid

Operator:

SF: 399.9697 MHz

NSC: 0

PW: 10.90 usec, RG: 10

SI: 32768

Date: 27-Dec-2022

Solvent: TFA

SW: 8000 Hz

TE: 298 K

AQ: 2.00 sec, RD: 0.00 sec

PPM

lv-488\_C13

162.67  
161.66  
161.32  
160.97  
160.62131.95  
127.86  
127.68  
126.70  
123.49  
117.33  
117.17  
115.07  
112.82  
110.57

48.53

37.52

26.70

21.45

S35

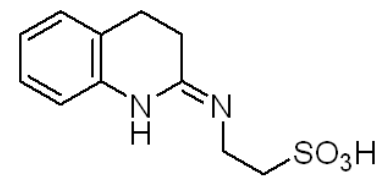**7e** CF<sub>3</sub>COOD

PPM

190 180 170 160 150 140 130 120 110 100 90 80 70 60 50 40 30 20 10 0

File name: lv-488\_C13

Operator: root

SF: 125.6429 MHz

NSC: 60

PW: 0.00 usec, RG: 51200

SI: 131072

Date: 28-Dec-2022

Solvent: TFA

SW: 32680 Hz

TE: 683 K

AQ: 1.57 sec, RD: 0.00 sec

PPM

162.66  
161.65  
161.30  
160.96  
160.61131.96  
127.87  
127.69  
126.72  
123.50  
117.35  
117.19  
115.09  
112.84  
110.58

48.55

37.54

26.79

21.46

S36

lv-488\_APTC13

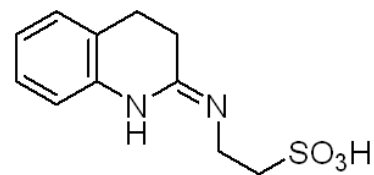**7e** CF<sub>3</sub>COOD

PPM 180 170 160 150 140 130 120 110 100 90 80 70 60 50 40 30 20 10 0

File name: lv-488\_APTC13

Operator: root

SF: 125.6429 MHz

NSC: 74

PW: 0.00 usec, RG: 51200

SI: 65536

Date: 28-Dec-2022

Solvent: DMSO

SW: 32680 Hz

TE: 683 K

AQ: 1.57 sec, RD: 0.00 sec

lv-19.fid

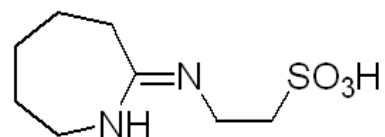**7f** D<sub>2</sub>O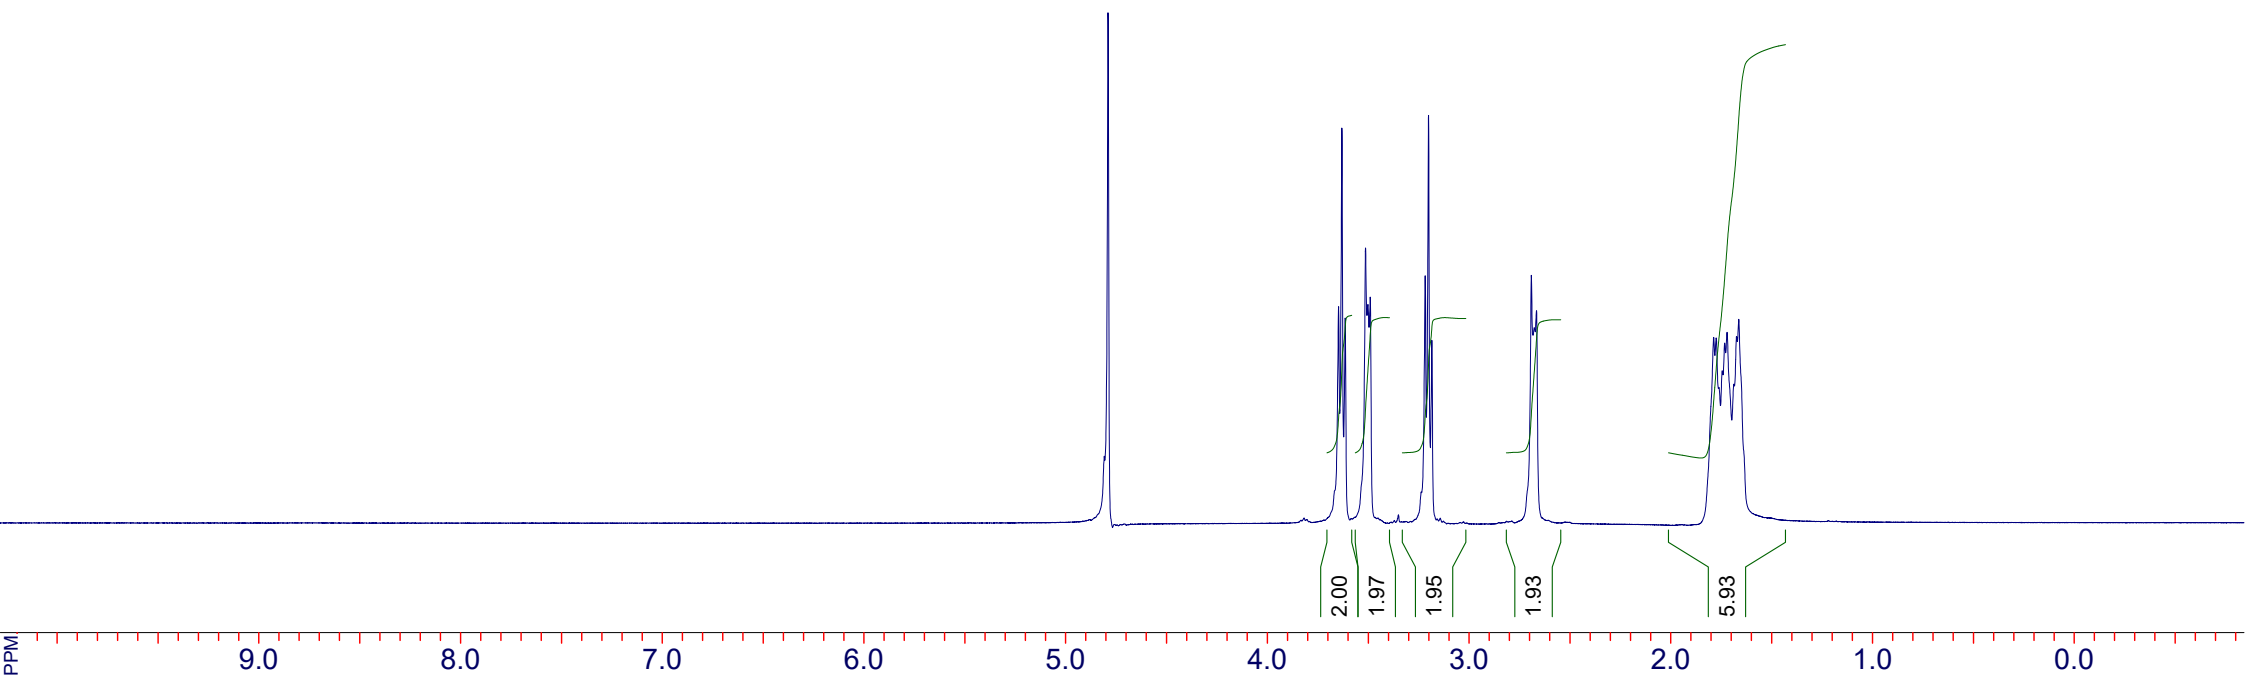

File name: lv-19.fid

Operator:

SF: 399.9733 MHz

NSC: 0

PW: 10.90 usec, RG: 24

SI: 32768

Date: 03-Jun-2022

Solvent: dms0

SW: 8000 Hz

TE: 298 K

AQ: 2.00 sec, RD: 0.00 sec

lv-19\_C13

169.23

47.57

43.71

37.12

31.82

28.54

26.87

22.50

S38

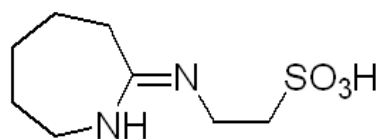7f D<sub>2</sub>O

200 180 160 140 120 100 80 60 40 20 0

File name: lv-19\_C13

Operator: root

SF: 125.6681 MHz

NSC: 316

PW: 0.00 usec, RG: 51200

SI: 131072

Date: 05-Jun-2022

Solvent: D2O

SW: 32680 Hz

TE: 683 K

AQ: 0.78 sec, RD: 0.00 sec



lv-19\_C13APT

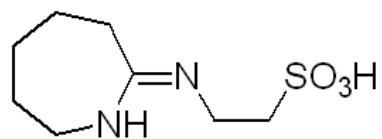**7f** D<sub>2</sub>O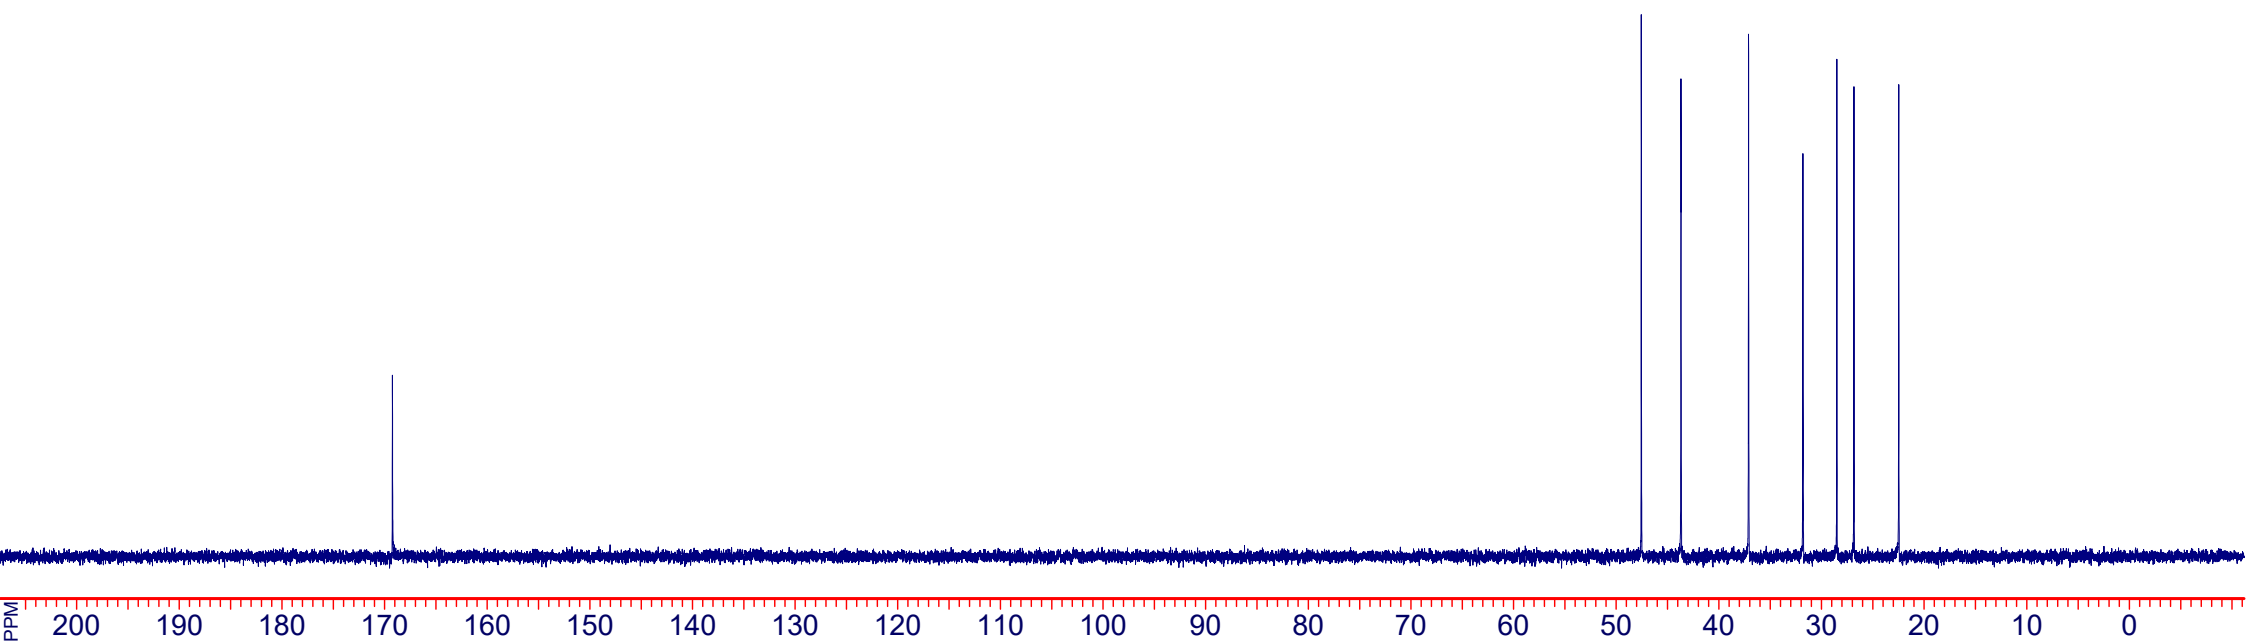

File name: lv-19\_C13APT

Operator: root

SF: 125.6681 MHz

NSC: 330

PW: 0.00 usec, RG: 51200

SI: 65536

Date: 05-Jun-2022

Solvent: D2O

SW: 32680 Hz

TE: 683 K

AQ: 1.57 sec, RD: 0.00 sec

PPM

lv-21

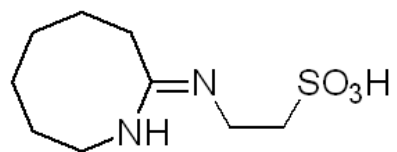**7g** D<sub>2</sub>O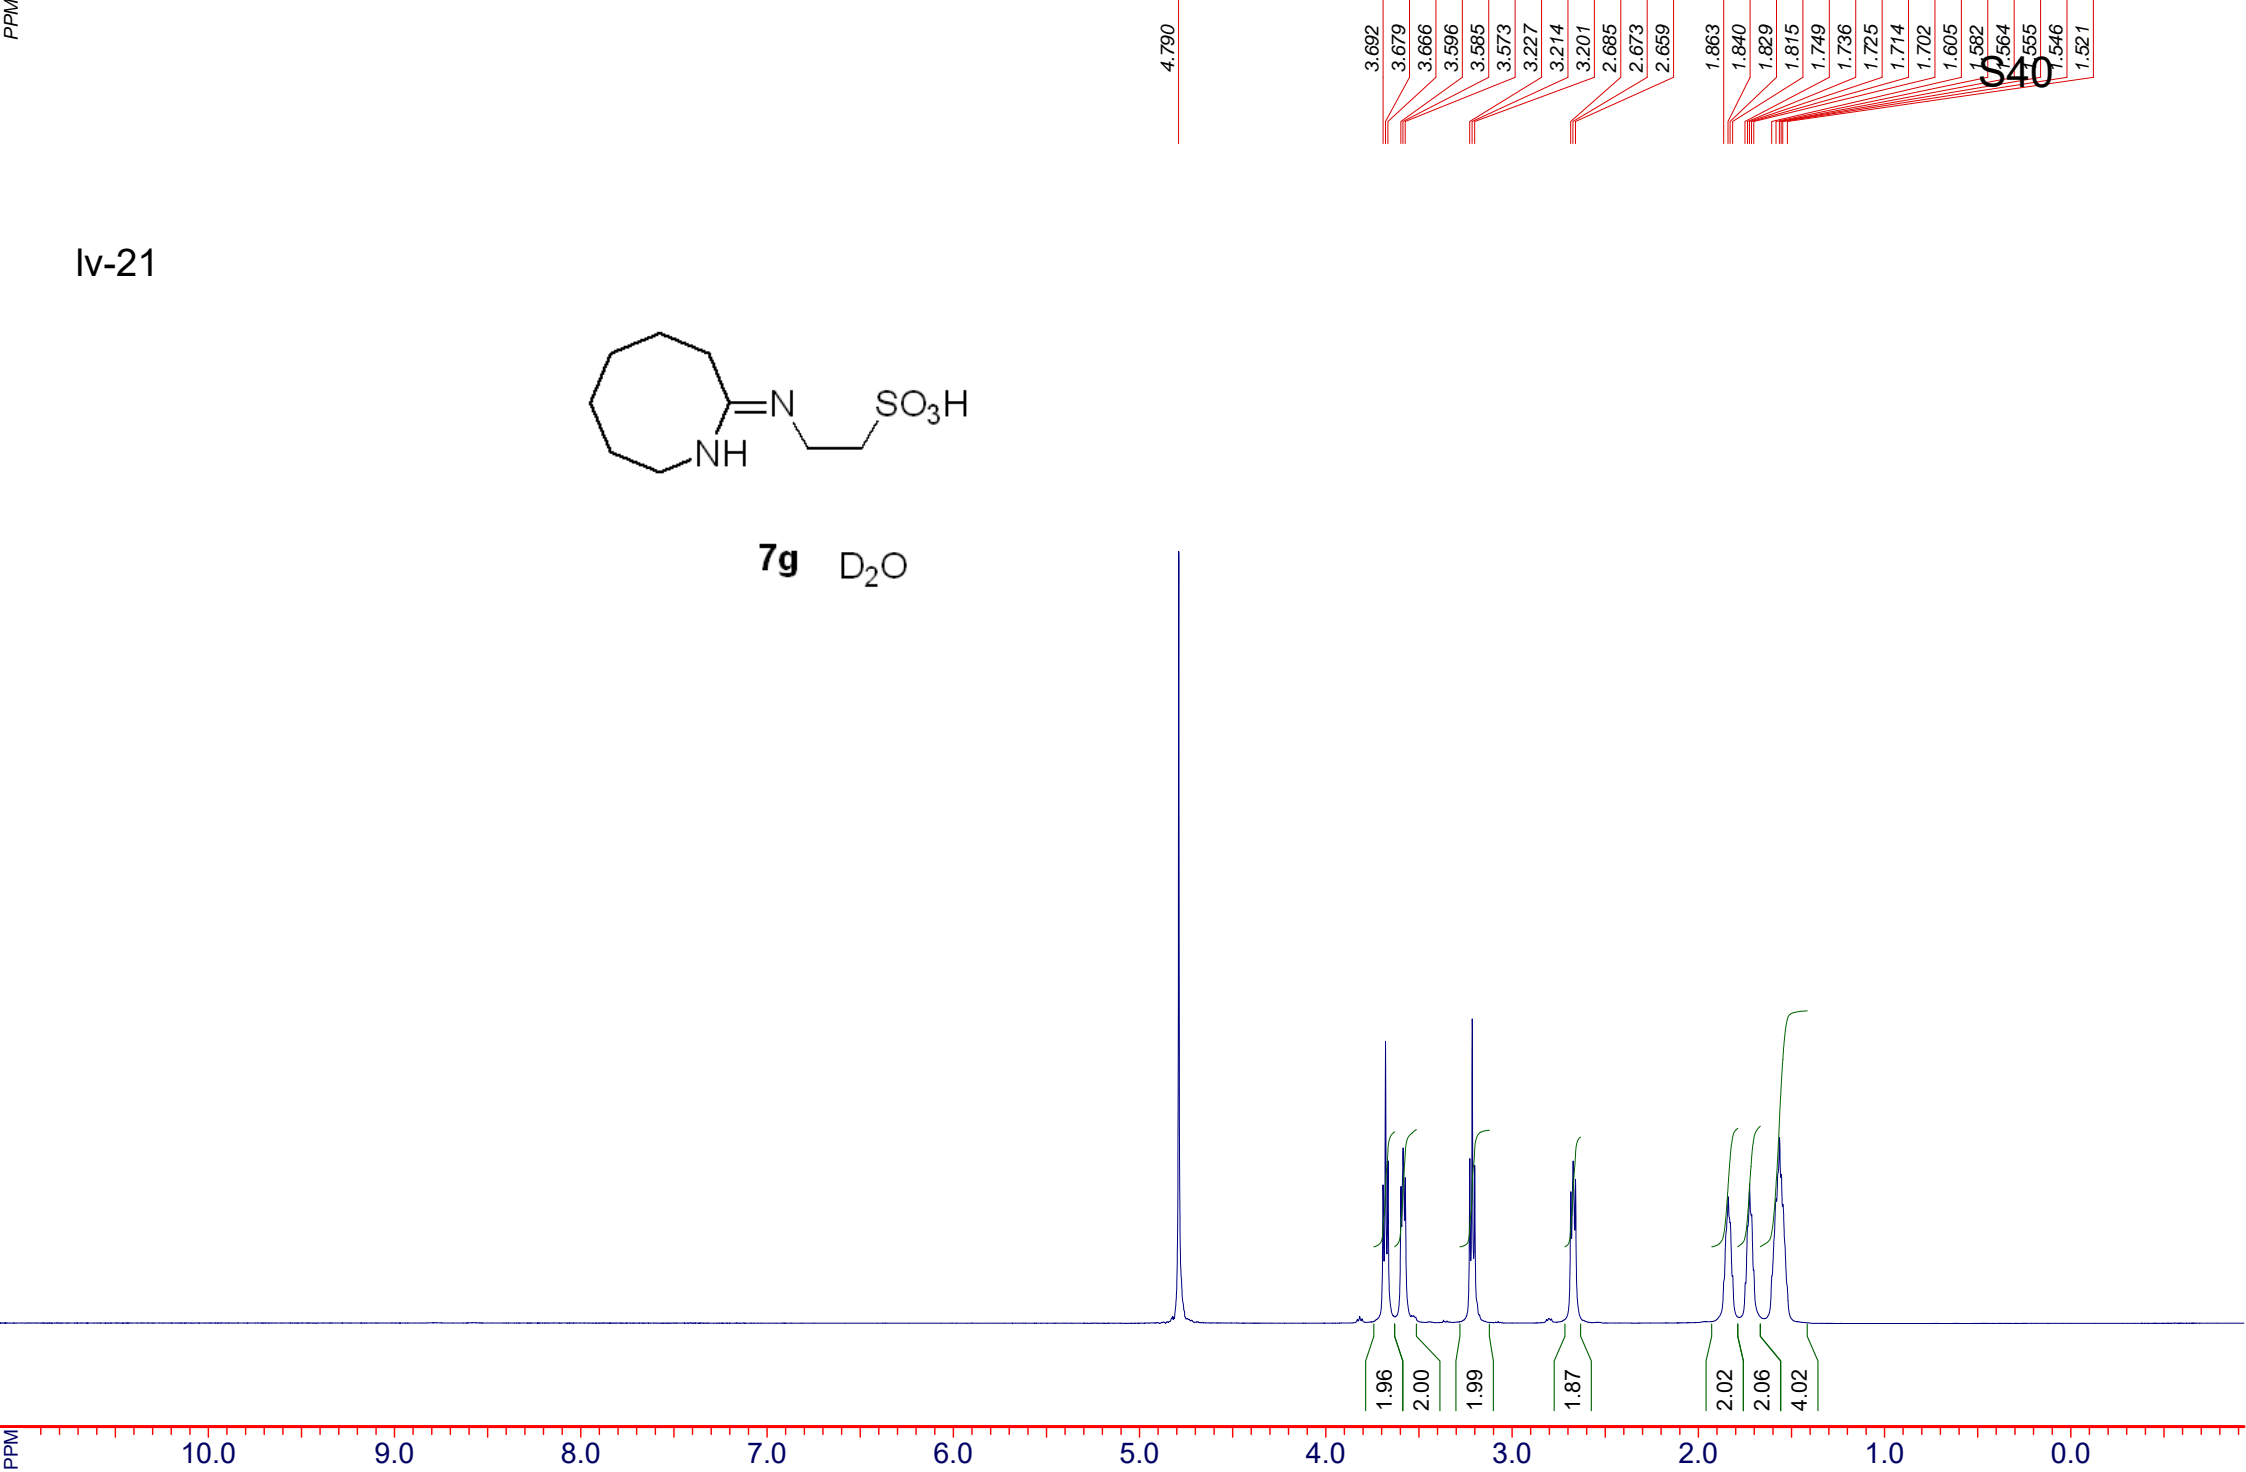

PPM

File name: lv-21

Operator: root

SF: 499.7730 MHz

NSC: 1

PW: 0.00 usec, RG: 22

SI: 32768

Date: 01-Jun-2022

Solvent: D2O

SW: 10776 Hz

TE: 683 K

AQ: 1.52 sec, RD: 0.00 sec

PPM

167.70

47.64

41.99

36.91

30.00

28.25

28.09

24.10

23.33

S41

lv-21\_C13

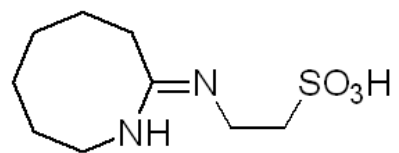**7g** D<sub>2</sub>O

PPM

200

180

160

140

120

100

80

60

40

20

0

File name: lv-21\_C13

Operator: root

SF: 125.6681 MHz

NSC: 76

PW: 0.00 usec, RG: 51200

SI: 131072

Date: 01-Jun-2022

Solvent: D2O

SW: 32680 Hz

TE: 683 K

AQ: 0.78 sec, RD: 0.00 sec

PPM

lv-21\_C13APT

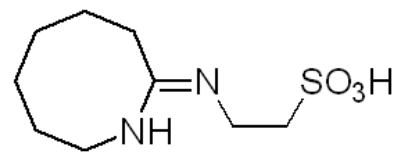**7g** D<sub>2</sub>O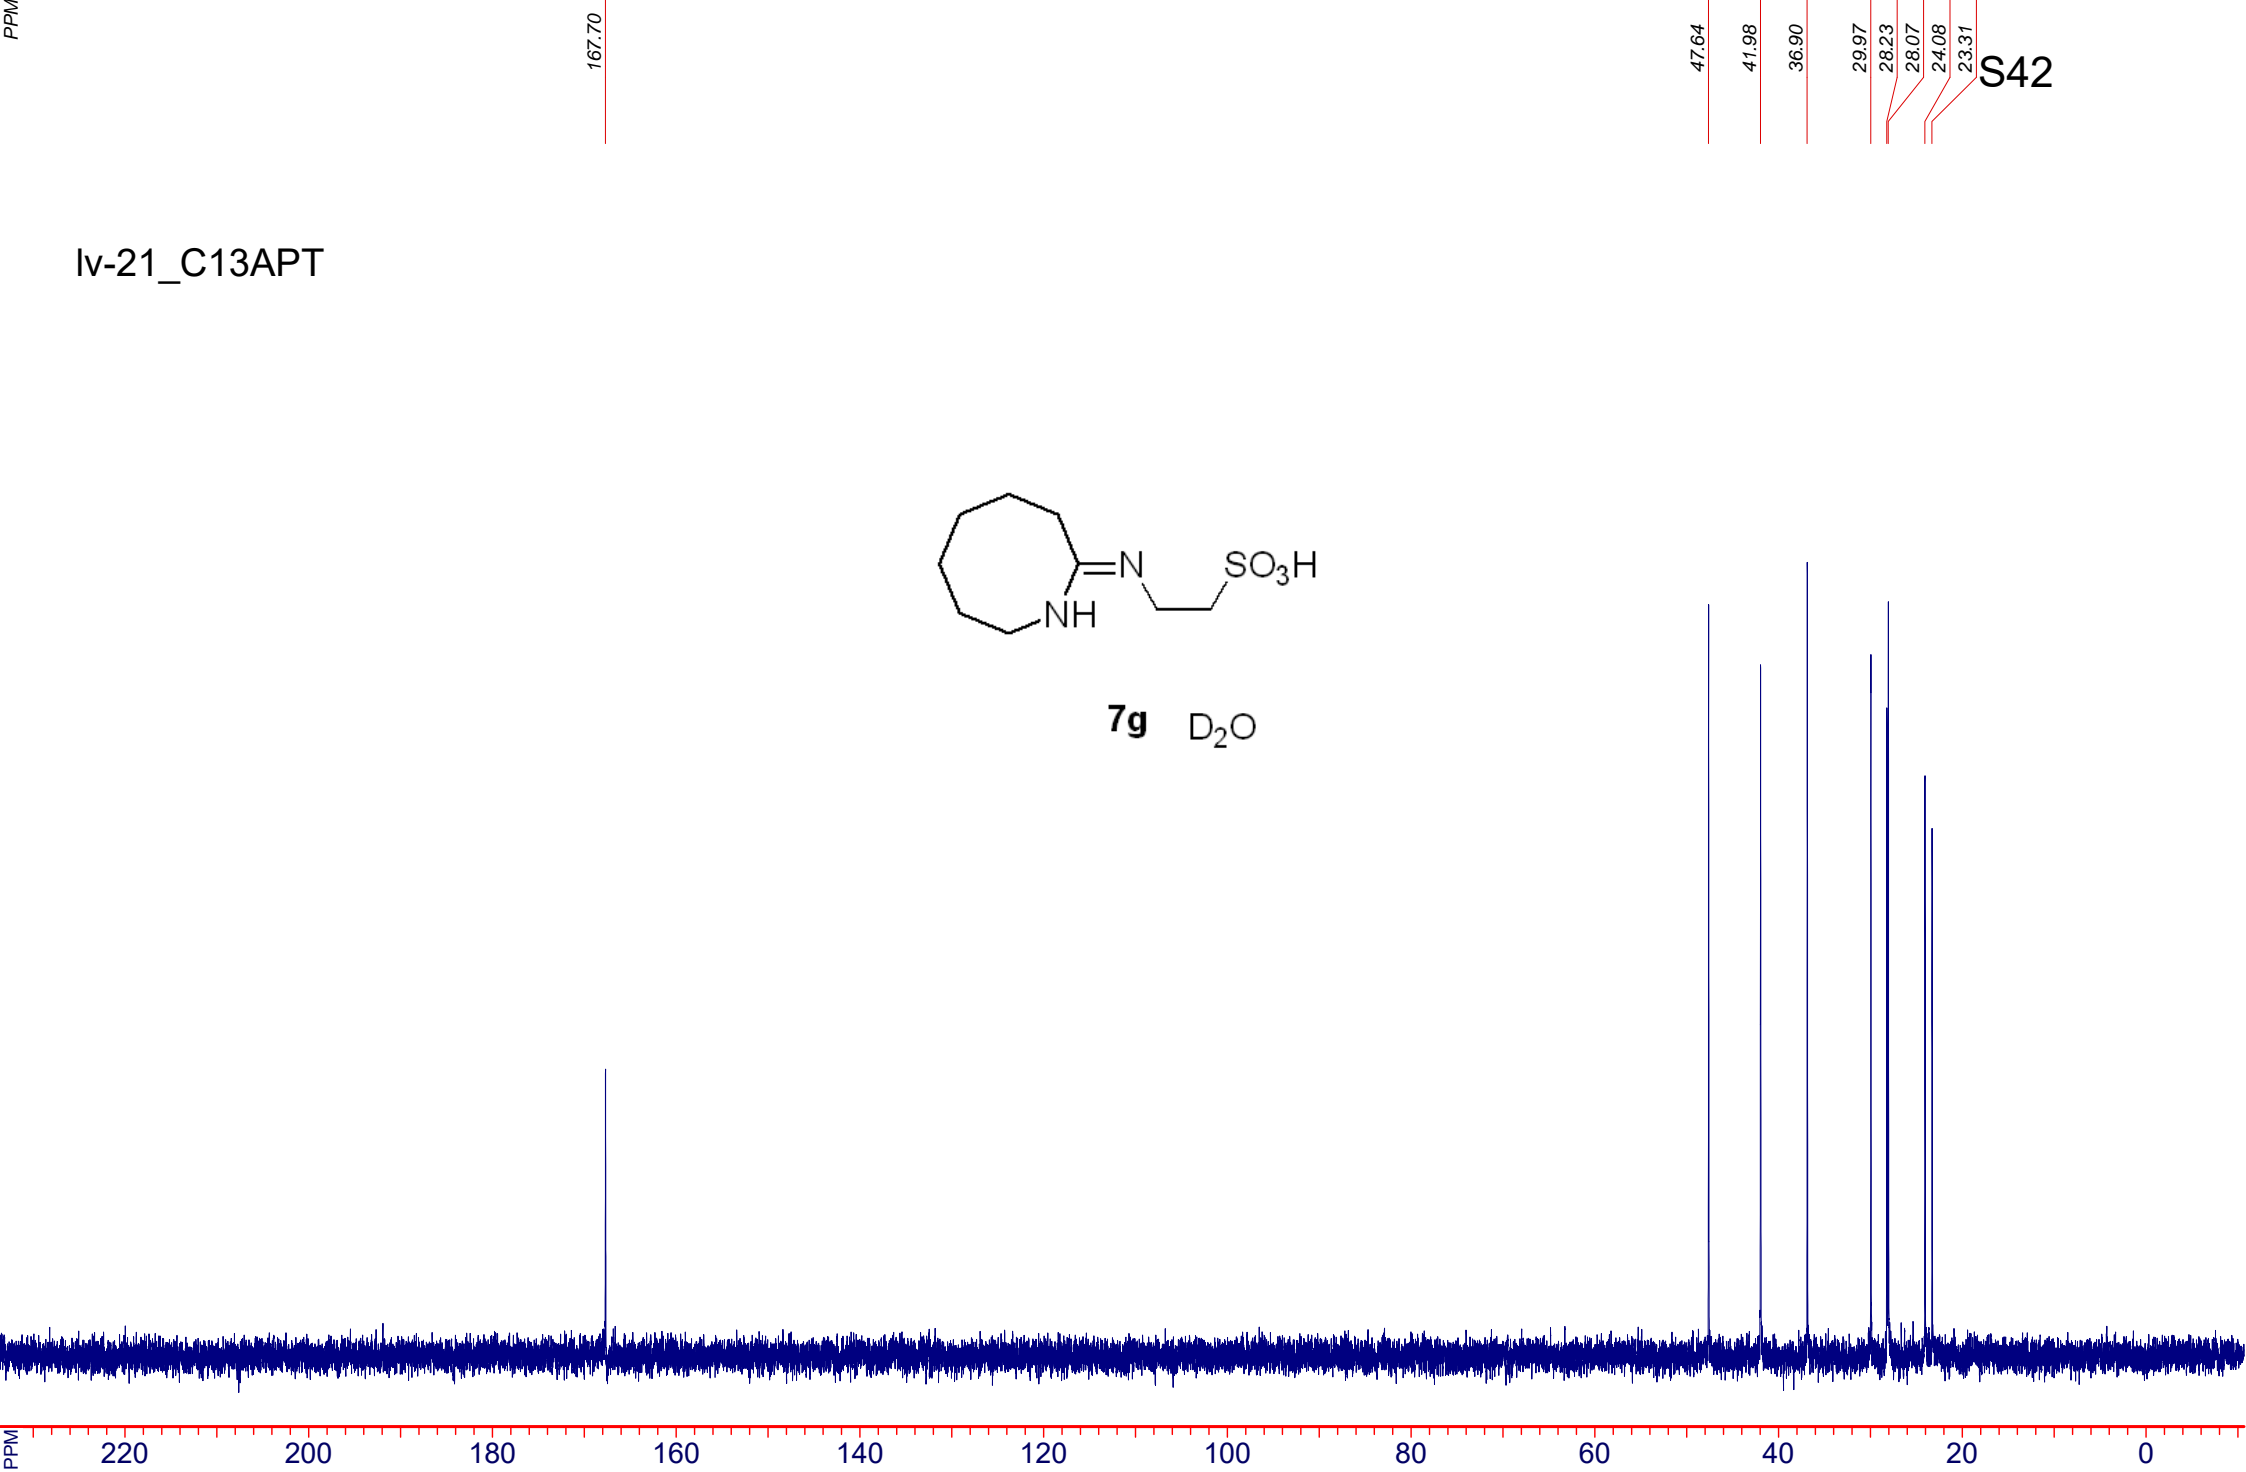

PPM

220

200

180

160

140

120

100

80

60

40

20

0

File name: lv-21\_C13APT

Operator: root

SF: 125.6681 MHz

NSC: 60

PW: 0.00 usec, RG: 51200

SI: 65536

Date: 01-Jun-2022

Solvent: D2O

SW: 32680 Hz

TE: 683 K

AQ: 1.57 sec, RD: 0.00 sec

PPM

3.842  
3.828  
3.812  
3.648  
3.631  
3.614  
3.347  
3.332  
3.317  
2.540  
2.521  
2.501  
1.951  
1.933  
1.914  
1.897  
1.878

S43

lv-5-1

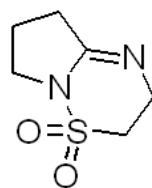**8a** DMSO-d6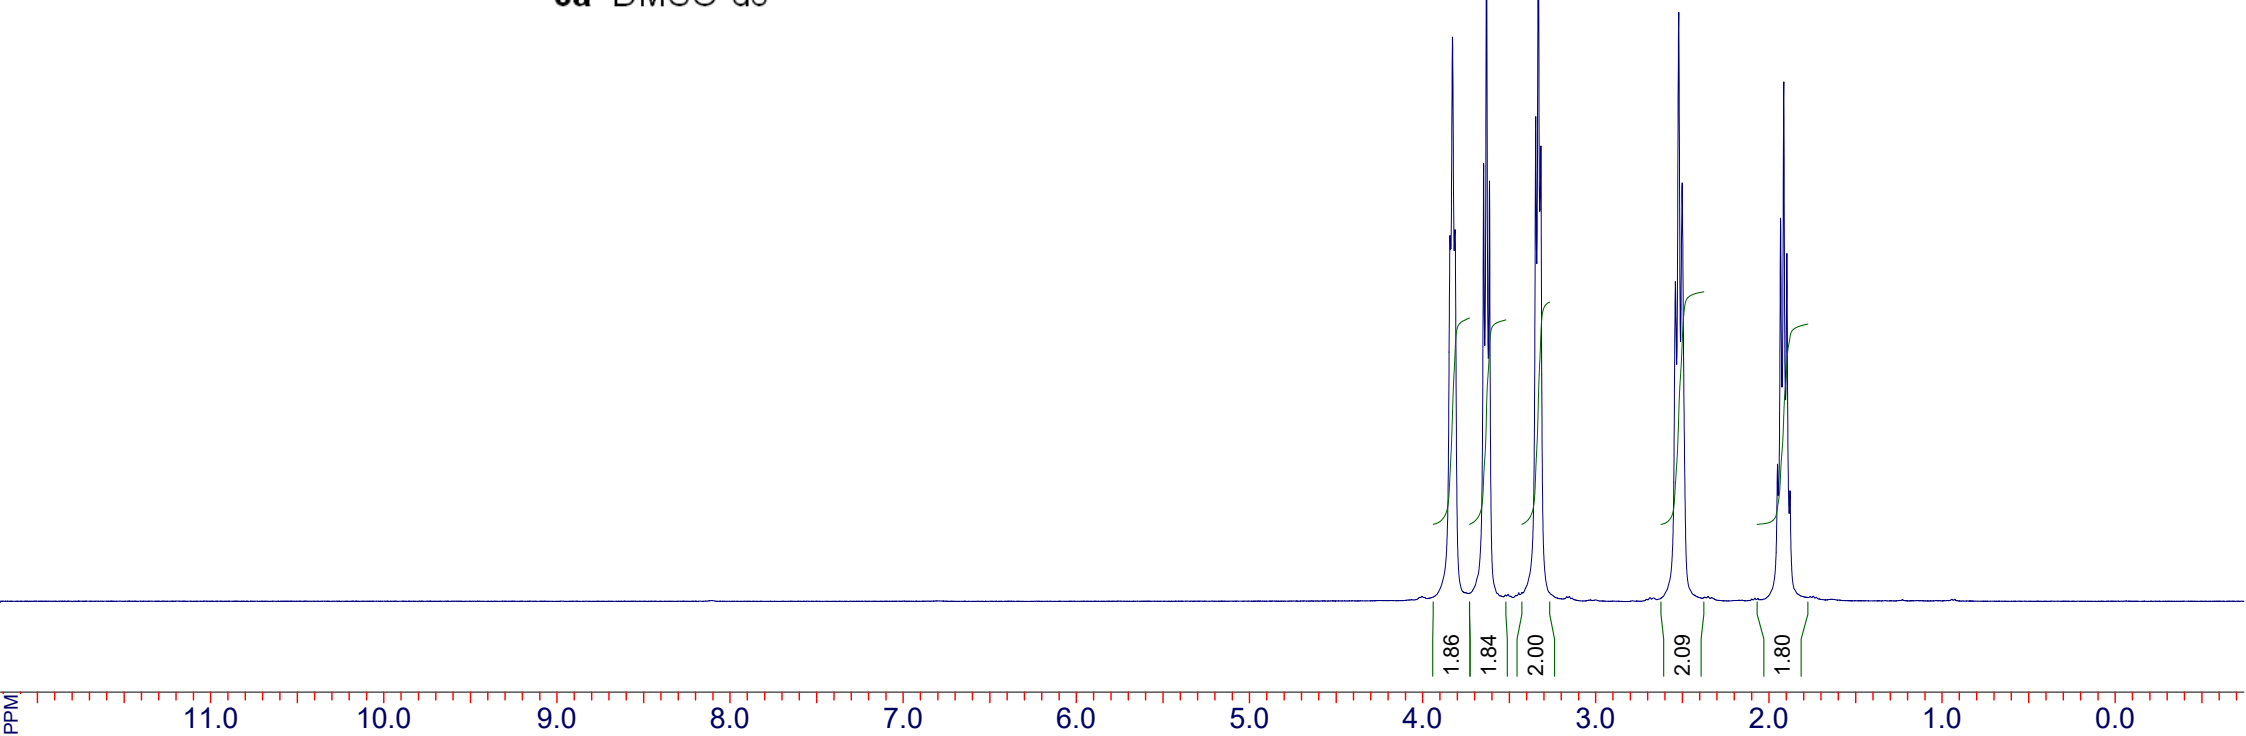

PPM

File name: lv-5-1

Operator: nmr

SF: 400.1300 MHz

NSC: 1

PW: 0.00 usec, RG: 25

SI: 32768

Date: 26-May-2022

Solvent: DMSO

SW: 8224 Hz

TE: 300 K

AQ: 1.99 sec, RD: 0.00 sec

Parameter file, TOPSPINVersion 2.1

PPM

156.59

46.00

44.72

44.22

39.55

31.15

18.95

S44

lv-5-1\_C13

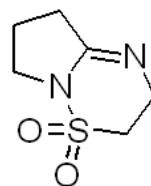**8a** DMSO-d6

PPM

190 180 170 160 150 140 130 120 110 100 90 80 70 60 50 40 30 20 10 0

File name: lv-5-1\_C13

Operator: root

SF: 125.6681 MHz

NSC: 250

PW: 0.00 usec, RG: 51200

SI: 131072

Date: 26-May-2022

Solvent: DMSO

SW: 32680 Hz

TE: 683 K

AQ: 0.78 sec, RD: 0.00 sec

PPM

156.53

45.95

44.68

44.17

39.51

31.09

18.89

S45

lv-5-1\_C13APT

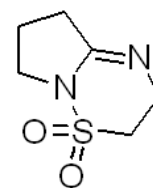**8a** DMSO-d6

PPM

200

180

160

140

120

100

80

60

40

20

0

File name: lv-5-1\_C13APT

Operator: root

SF: 125.6681 MHz

NSC: 179

PW: 0.00 usec, RG: 51200

SI: 65536

Date: 26-May-2022

Solvent: DMSO

SW: 32680 Hz

TE: 683 K

AQ: 1.57 sec, RD: 0.00 sec

lv623

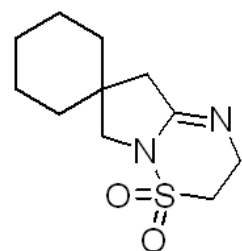**8b** DMSO-d6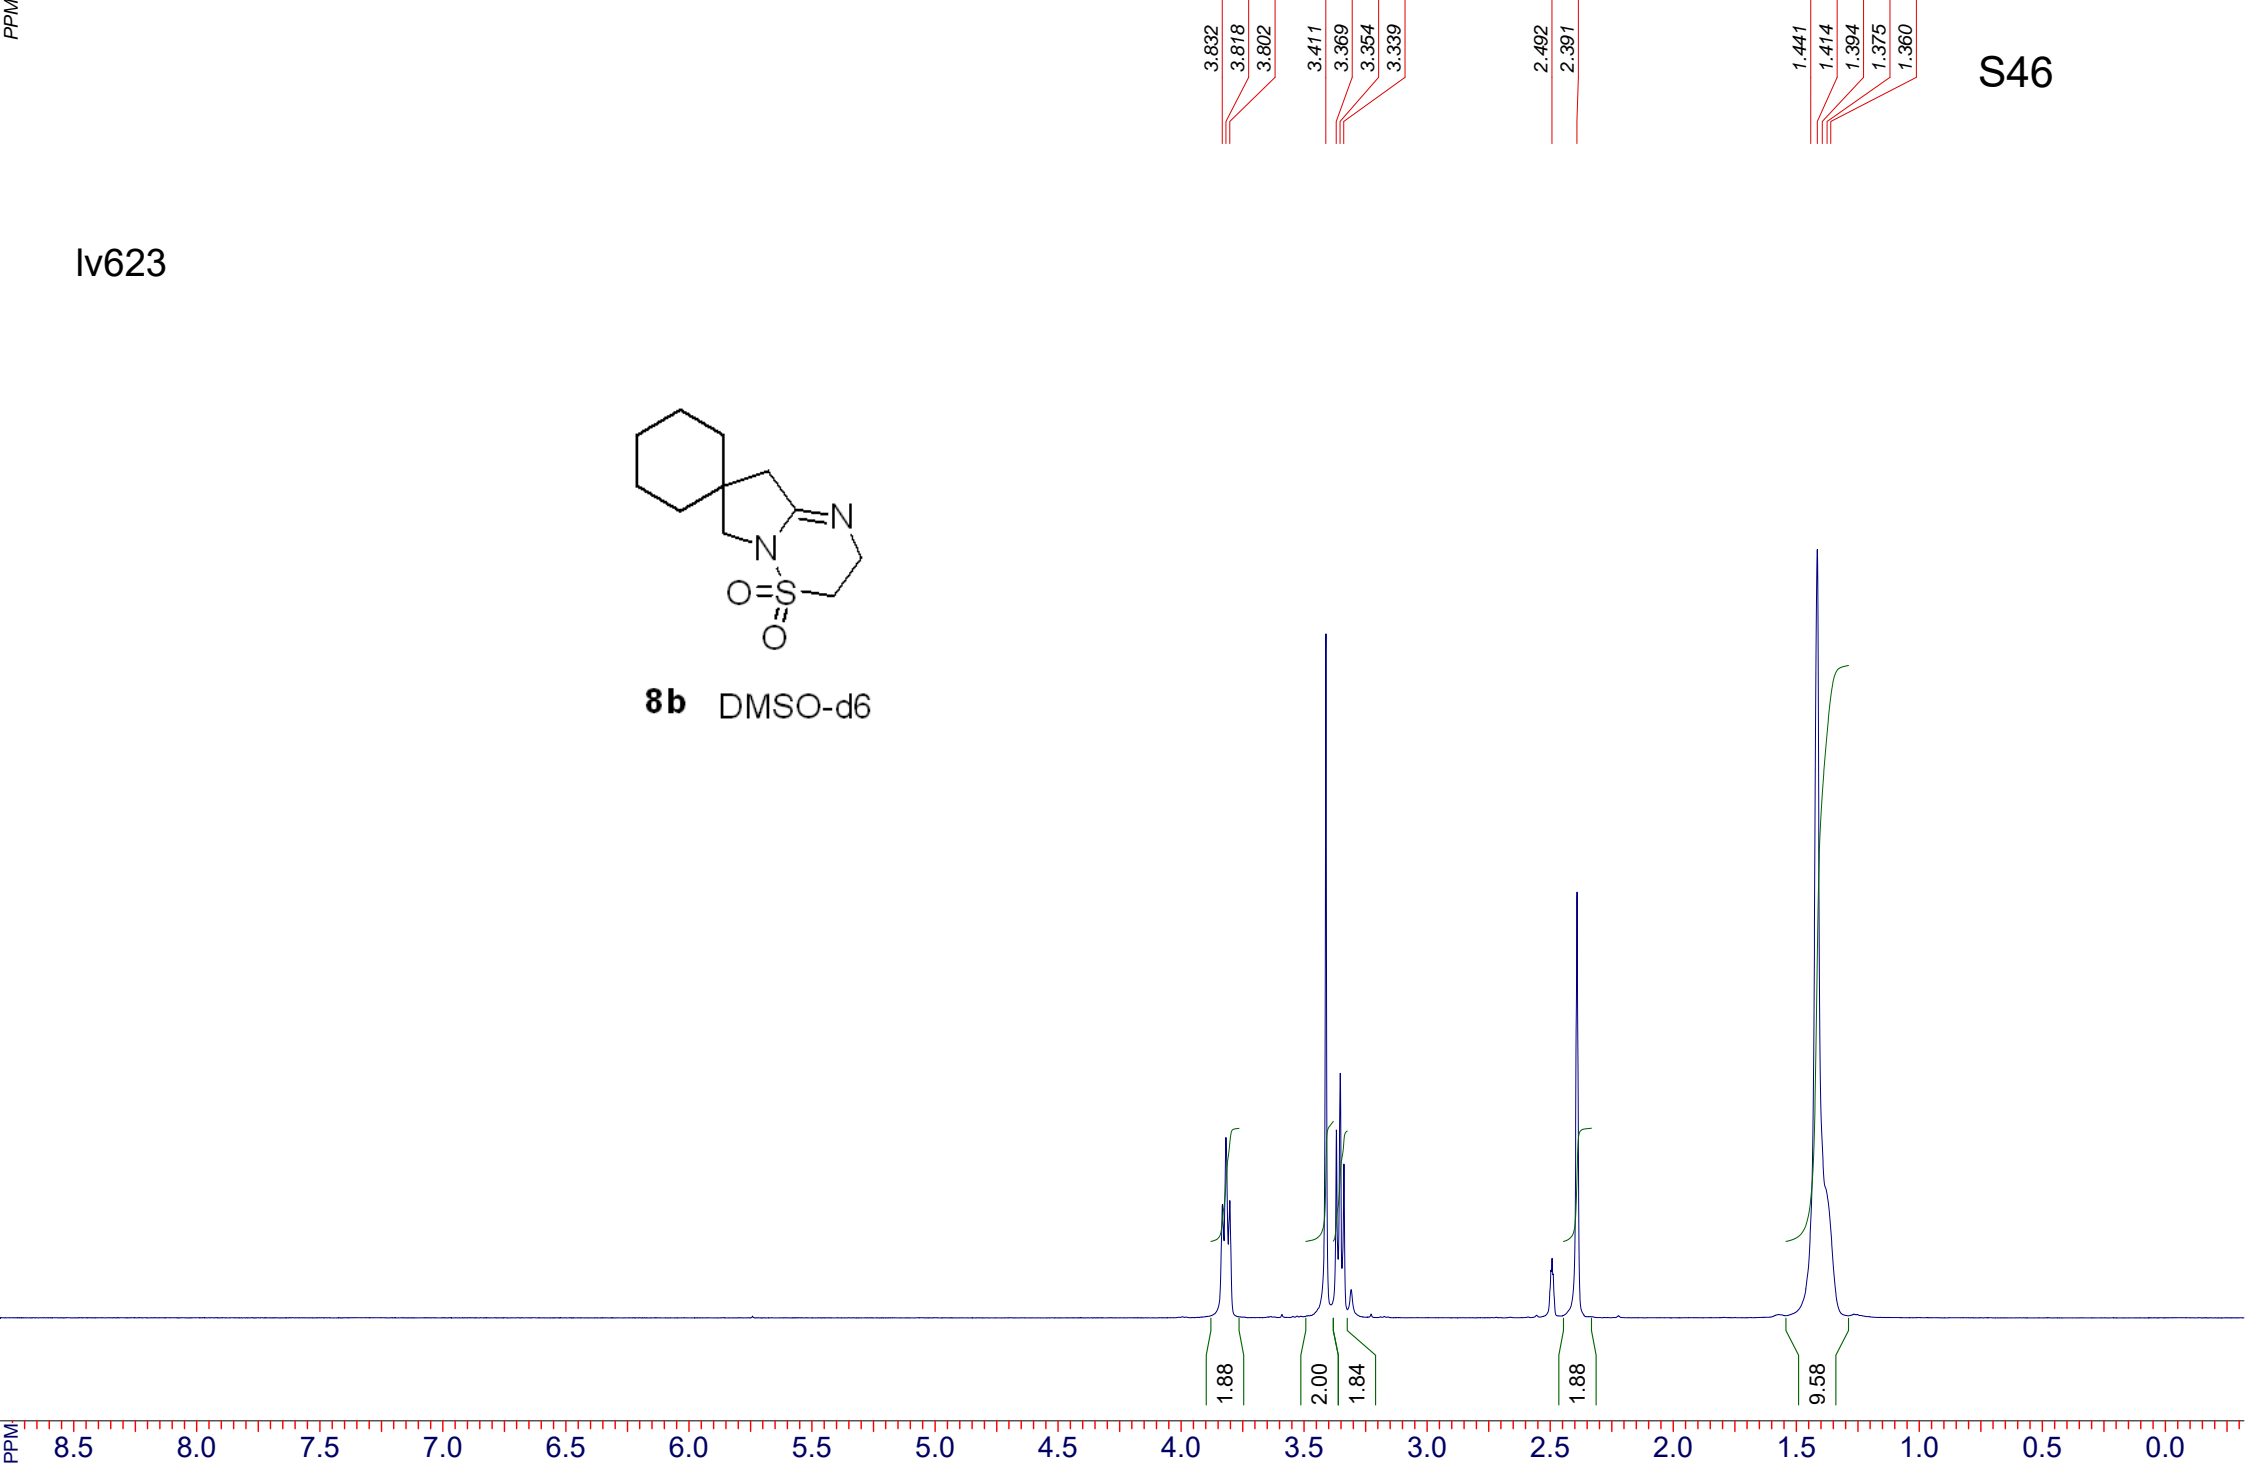

File name: lv623

Operator: nmr

SF: 400.1300 MHz

NSC: 1

PW: 0.00 usec, RG: 25

SI: 32768

Date: 18-Nov-2022

Solvent: DMSO

SW: 8224 Hz

TE: 300 K

AQ: 1.99 sec, RD: 0.00 sec



lv-623\_C13

156.45

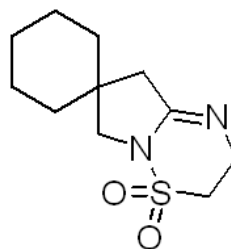**8b** DMSO-d6

53.97

46.40

45.31

43.54

40.02

37.76

34.75

25.82

22.88

S47

PPM

190 180 170 160 150 140 130 120 110 100 90 80 70 60 50 40 30 20 10 0

File name: lv-623\_C13

Operator: nmr

SF: 100.6128 MHz

NSC: 89

PW: 0.00 usec, RG: 2050

SI: 32768

Date: 09-Nov-2022

Solvent: DMSO

SW: 26042 Hz

TE: 300 K

AQ: 0.98 sec, RD: 0.00 sec

lv-623\_C13APT

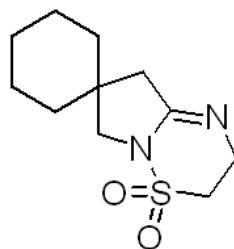**8b** DMSO-d6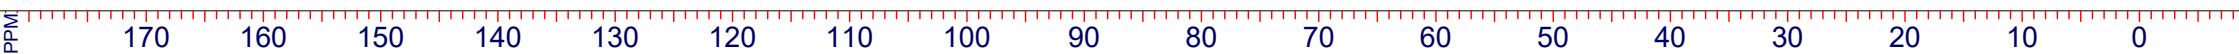

File name: lv-623\_C13APT

Operator: nmr

SF: 100.6128 MHz

NSC: 162

PW: 0.00 usec, RG: 2050

SI: 65536

Date: 09-Nov-2022

Solvent: DMSO

SW: 24038 Hz

TE: 300 K

AQ: 1.06 sec, RD: 0.00 sec

lv-4

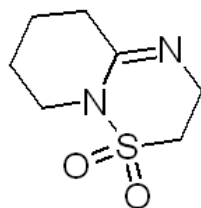**8c** DMSO-d6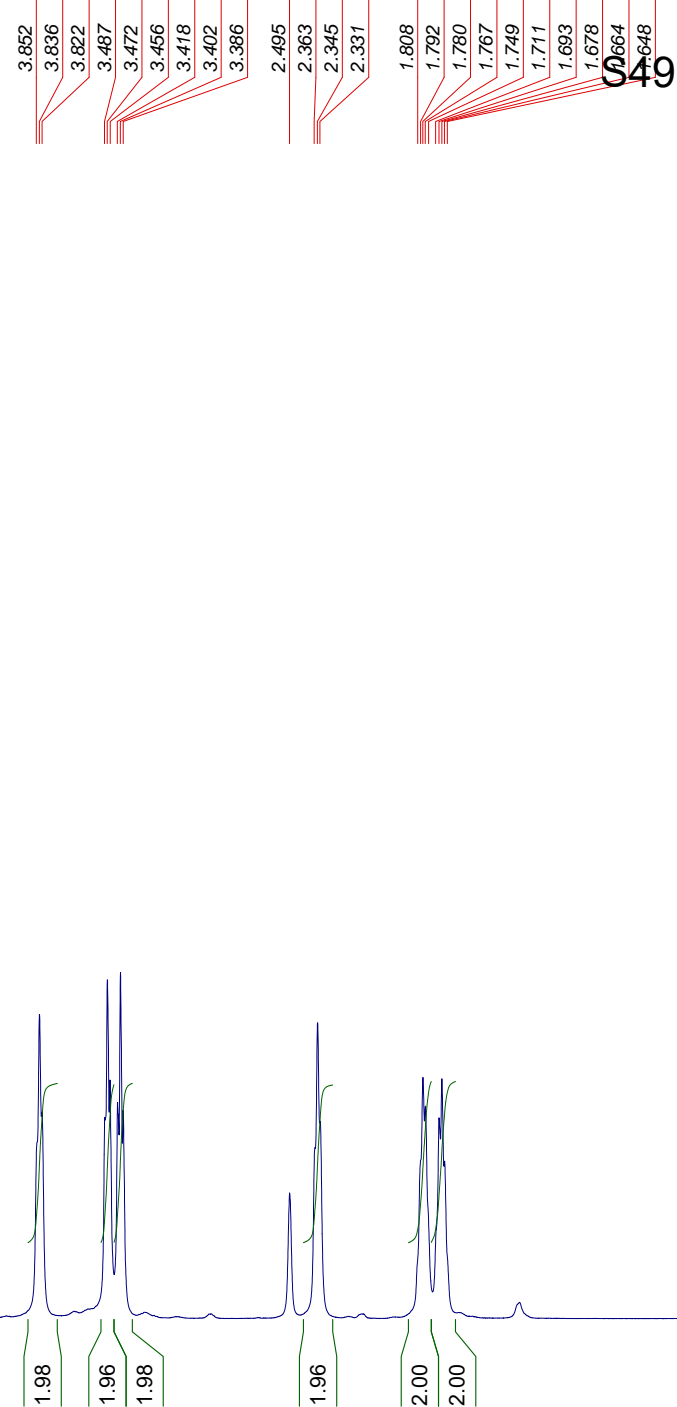

11.0 10.0 9.0 8.0 7.0 6.0 5.0 4.0 3.0 2.0 1.0 0.0

File name: lv-4

Operator: nmr

SF: 400.1300 MHz

NSC: 1

PW: 0.00 usec, RG: 25

SI: 32768

Date: 26-May-2022

Solvent: DMSO

SW: 8224 Hz

TE: 300 K

AQ: 1.99 sec, RD: 0.00 sec

151.72

44.85

44.34

42.37

39.55

32.92

22.97

20.92

S50

lv-4\_C13

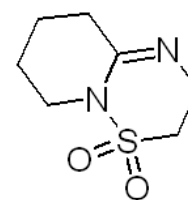**8c** DMSO-d6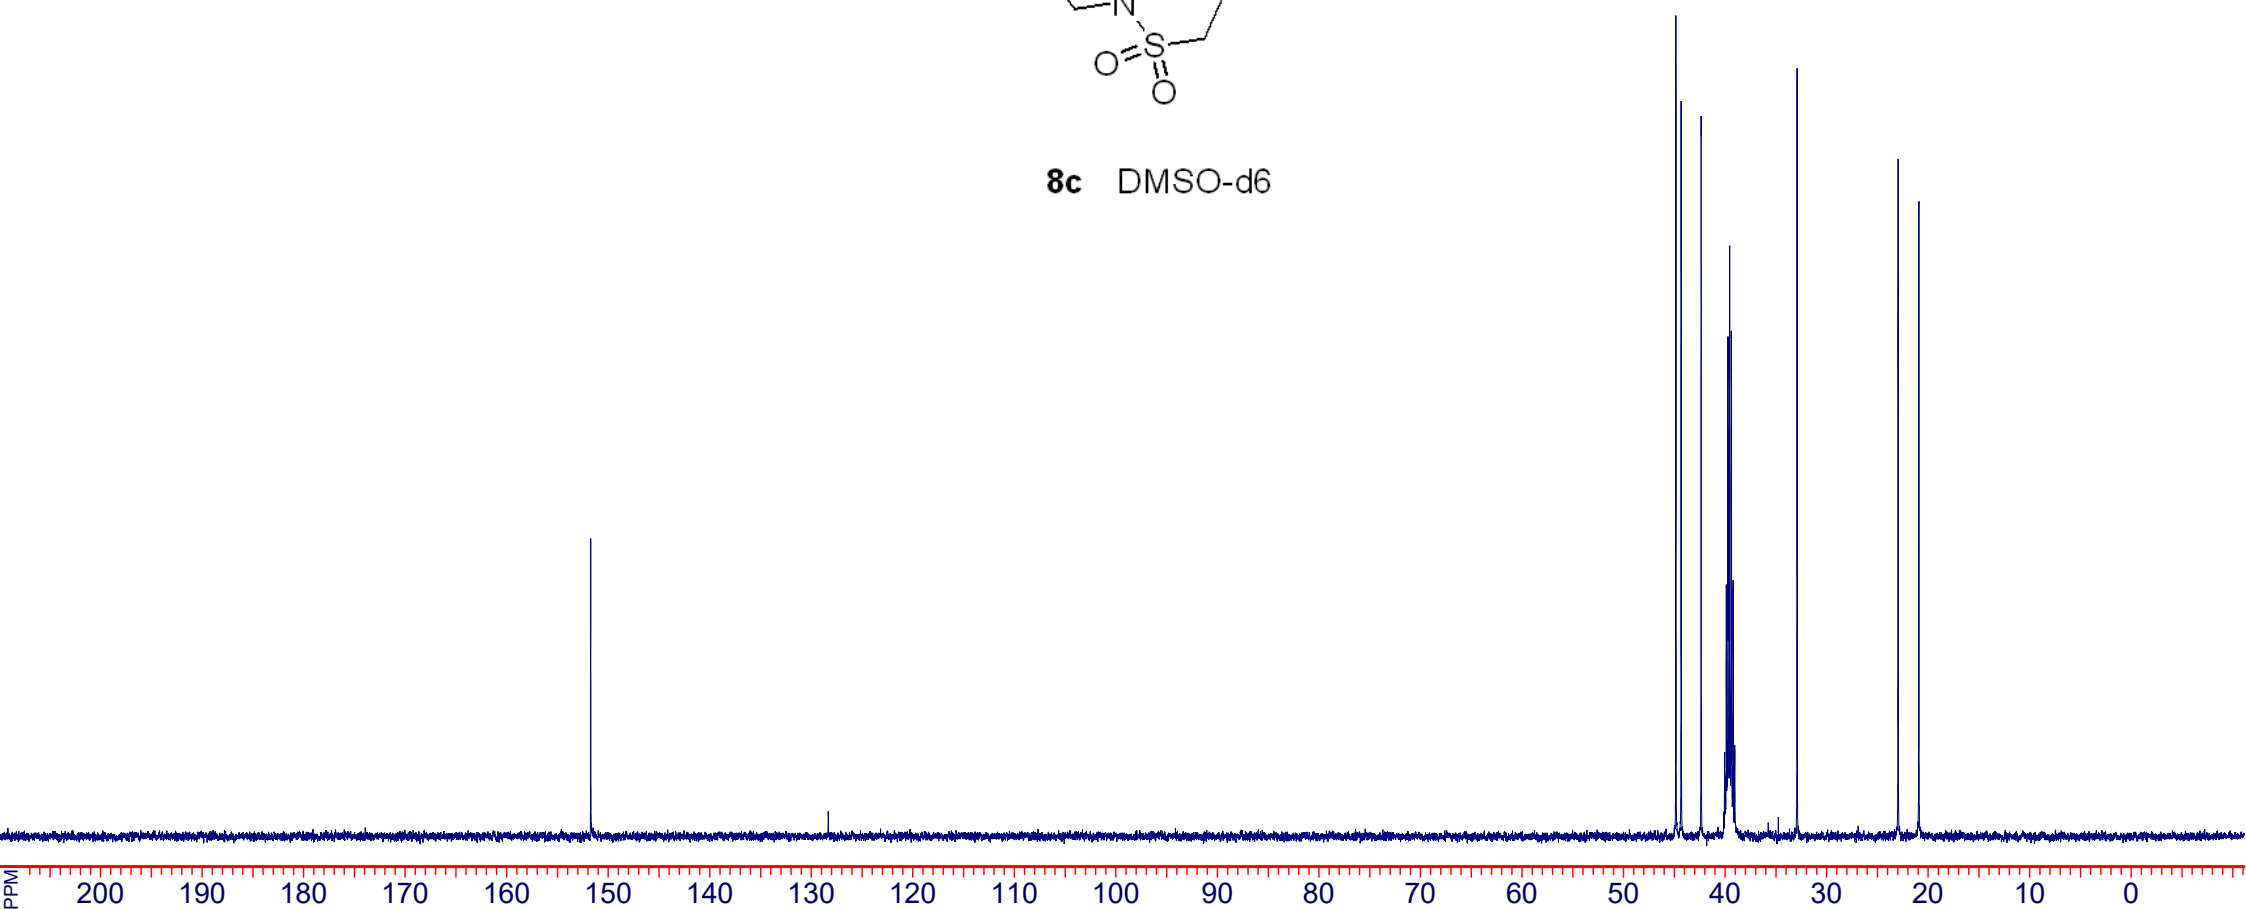

File name: lv-4\_C13

Operator: root

SF: 125.6681 MHz

NSC: 250

PW: 0.00 usec, RG: 51200

SI: 131072

Date: 26-May-2022

Solvent: DMSO

SW: 32680 Hz

TE: 683 K

AQ: 0.78 sec, RD: 0.00 sec

lv-4\_C13APT

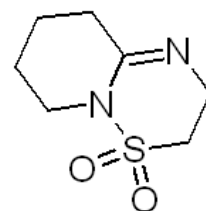**8c** DMSO-d6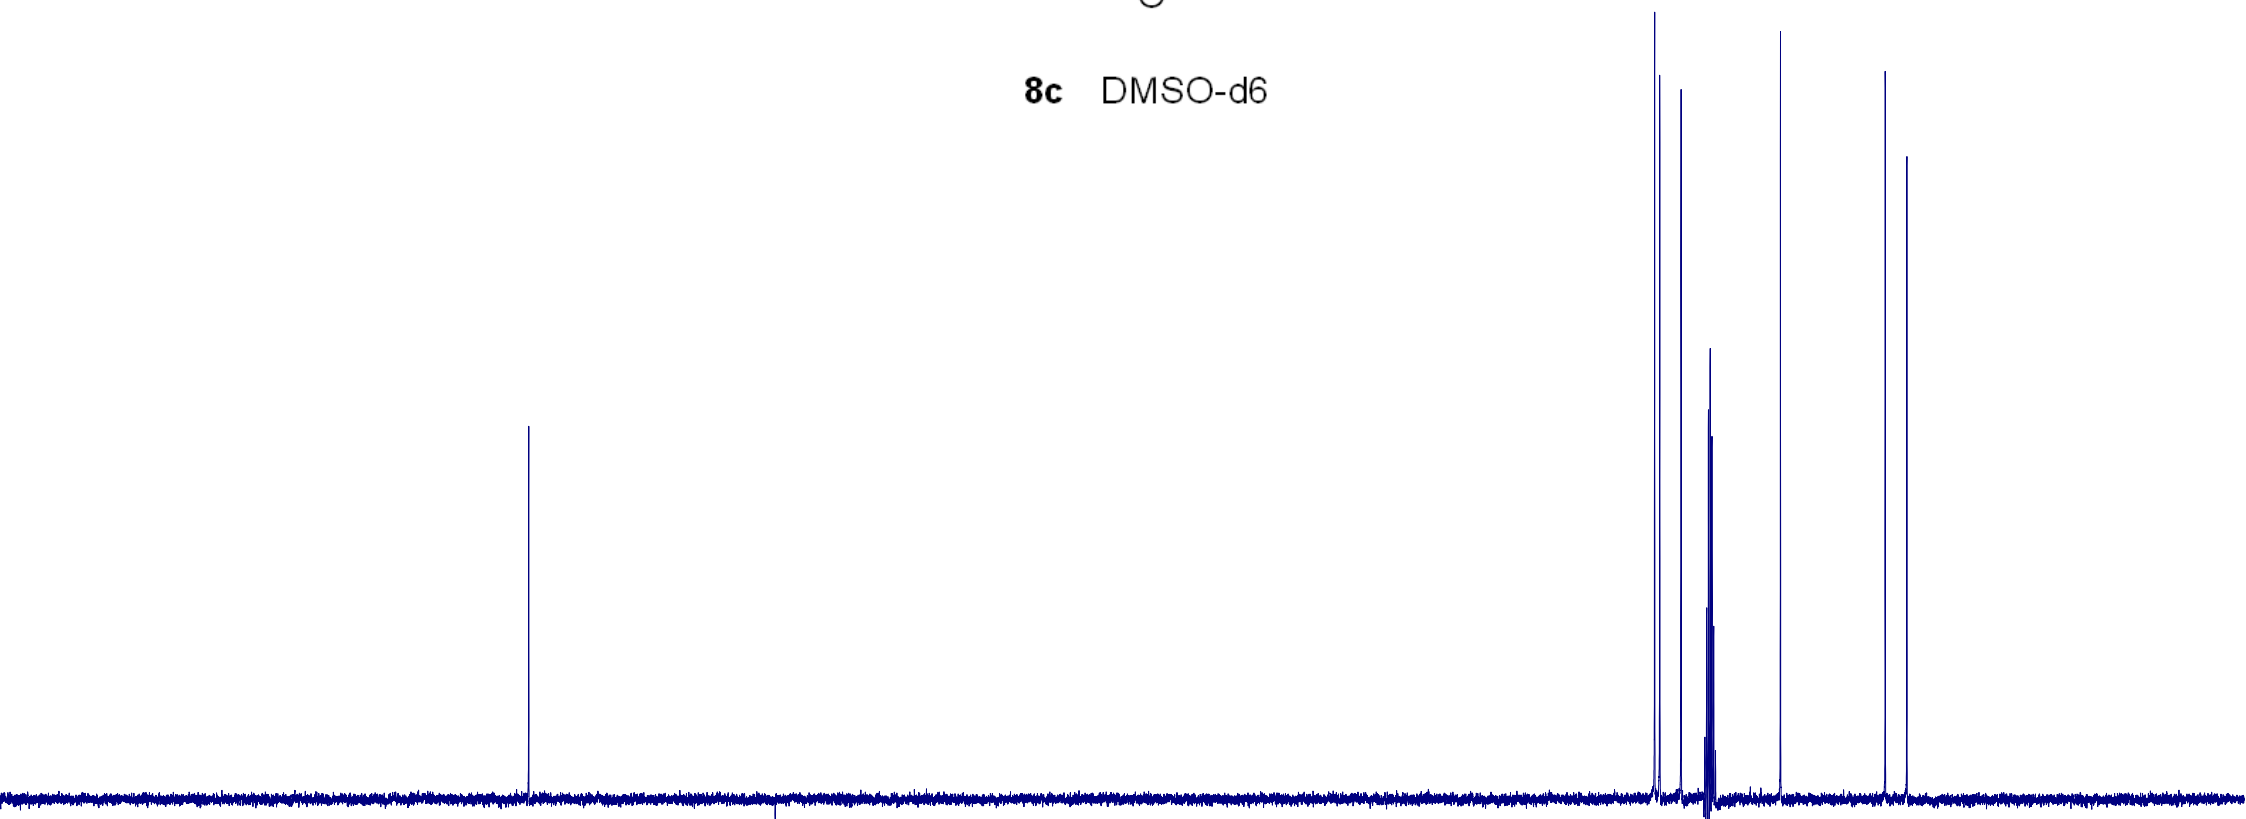

PPM 190 180 170 160 150 140 130 120 110 100 90 80 70 60 50 40 30 20 10 0

File name: lv-4\_C13APT

Operator: root

SF: 125.6681 MHz

NSC: 250

PW: 0.00 usec, RG: 51200

SI: 65536

Date: 26-May-2022

Solvent: DMSO

SW: 32680 Hz

TE: 683 K

AQ: 1.57 sec, RD: 0.00 sec

lv-6-1

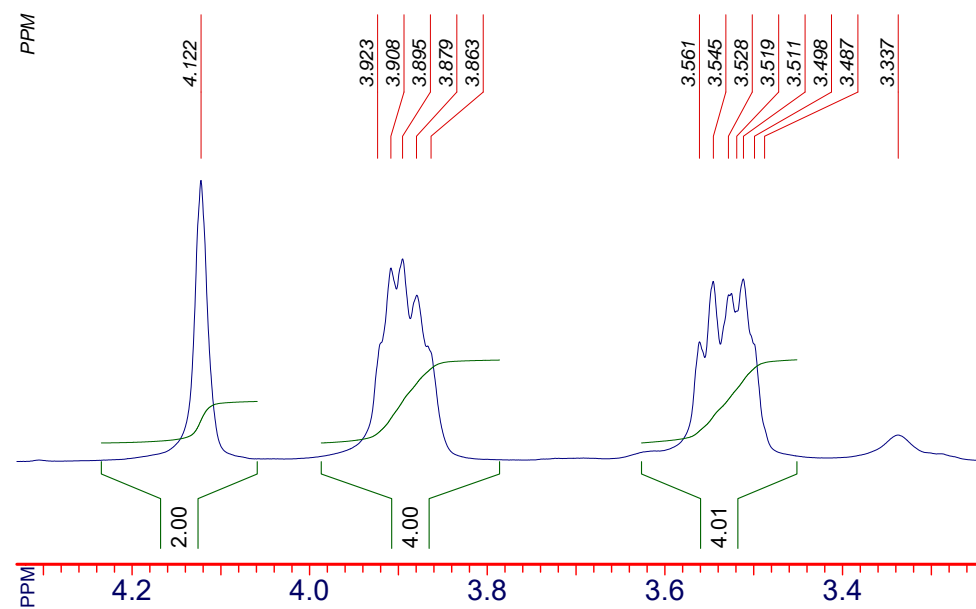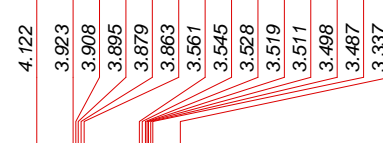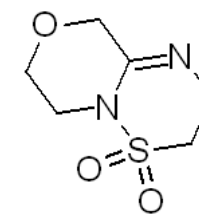

8d DMSO-d6

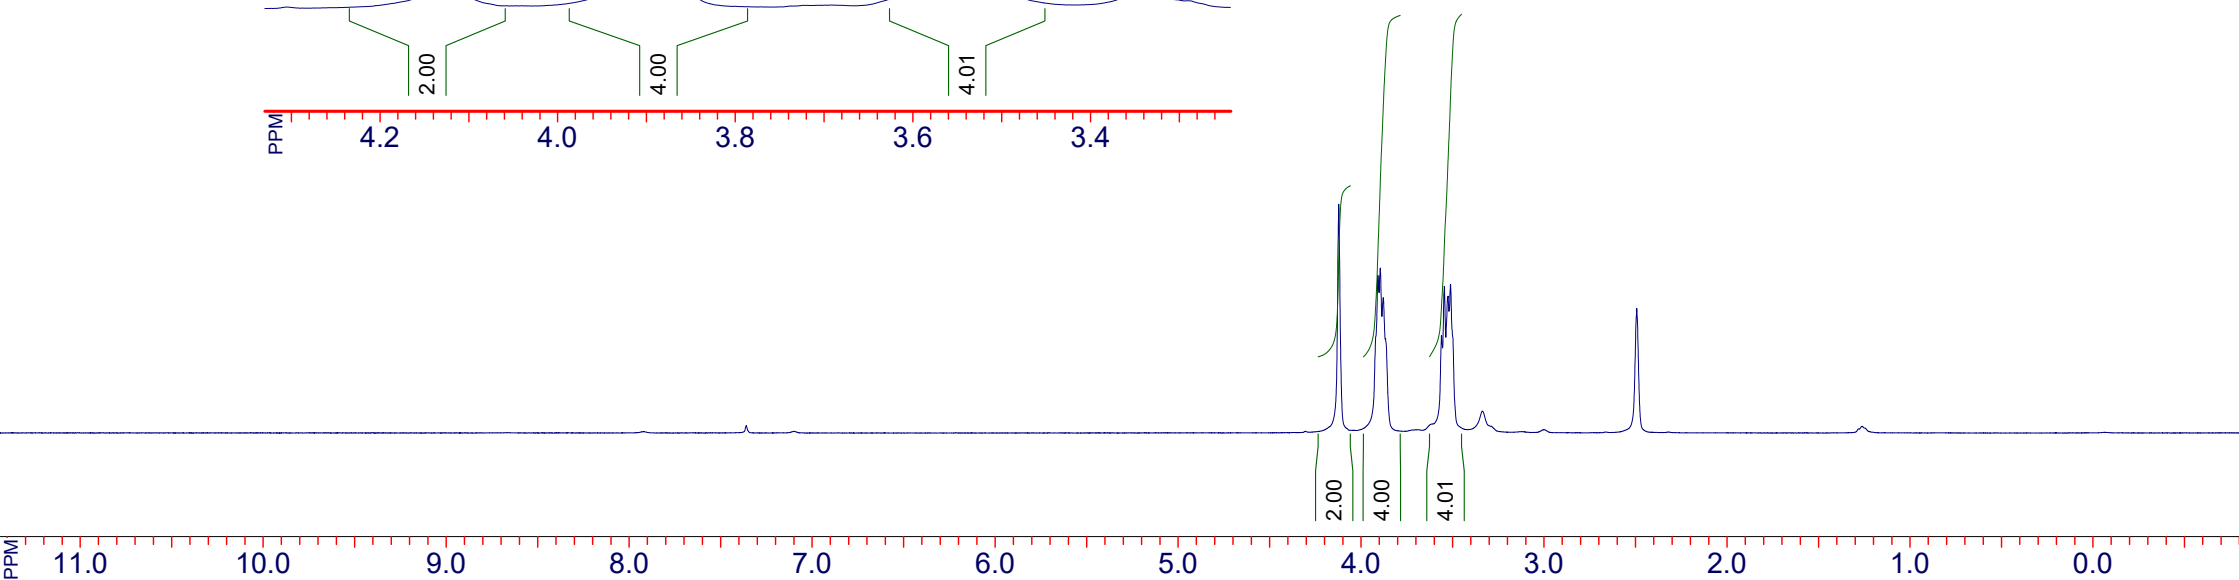

File name: lv-6-1

Operator: nmr

SF: 400.1300 MHz

NSC: 1

PW: 0.00 usec, RG: 25

SI: 32768

Date: 27-May-2022

Solvent: DMSO

SW: 8224 Hz

TE: 300 K

AQ: 1.99 sec, RD: 0.00 sec

lv-6\_C13.fid

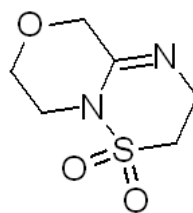**8d** DMSO-d6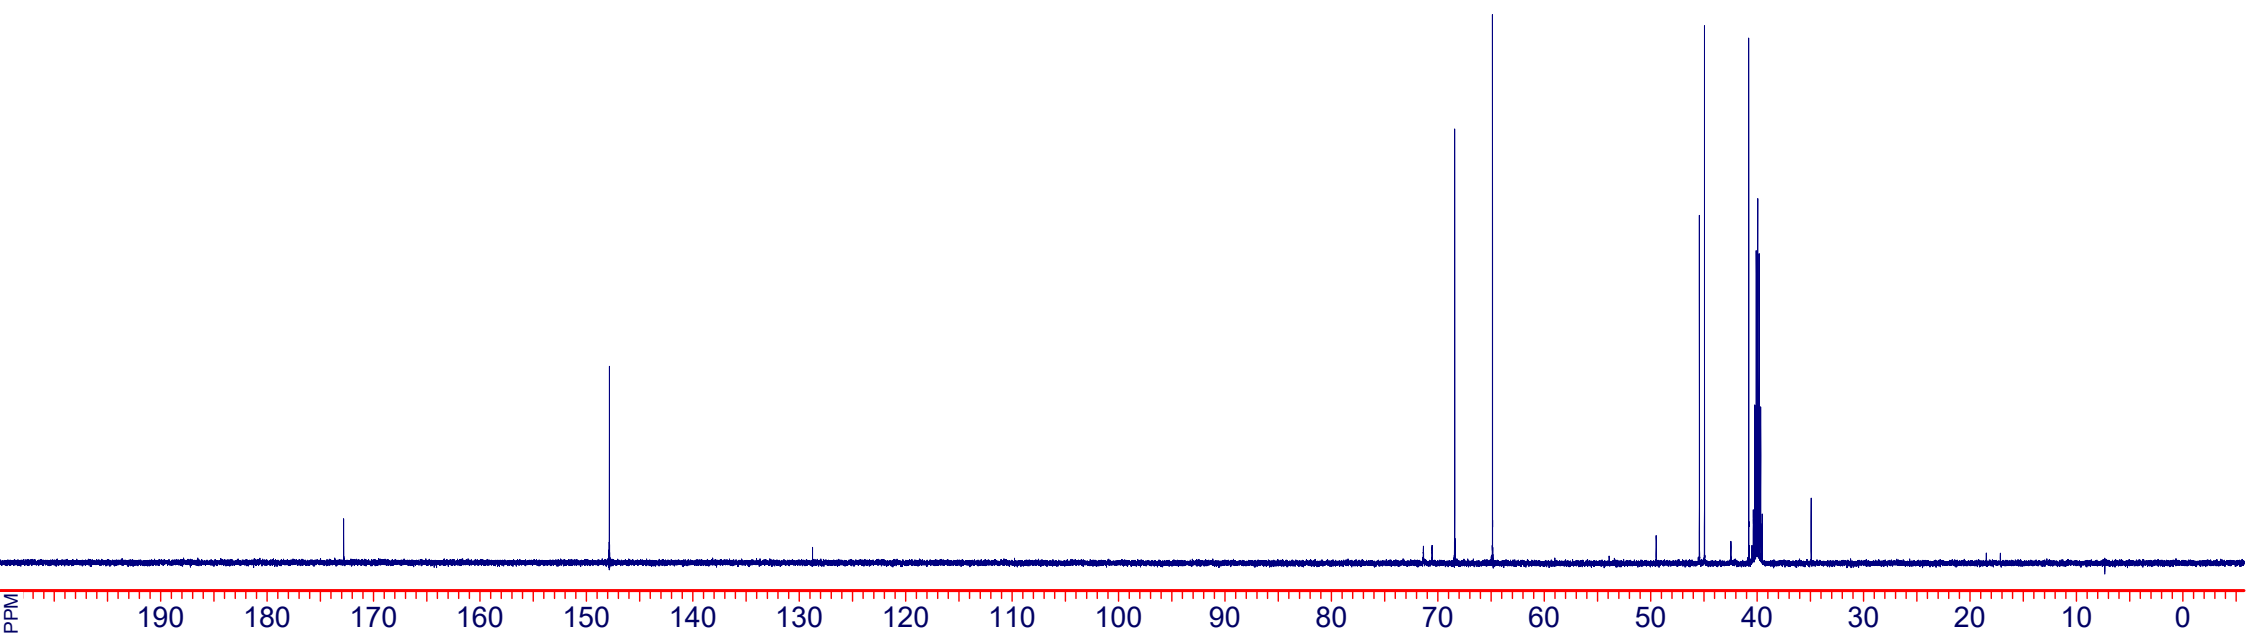

File name: lv-6\_C13.fid

Operator:

SF: 150.8304 MHz

NSC: 0

PW: 3.09 usec, RG: 60

SI: 65536

Date: 31-May-2022

Solvent: dms0

SW: 37879 Hz

TE: 298 K

AQ: 0.87 sec, RD: 0.00 sec

lv-6\_C13APT.fid

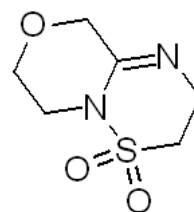**8d** DMSO-d6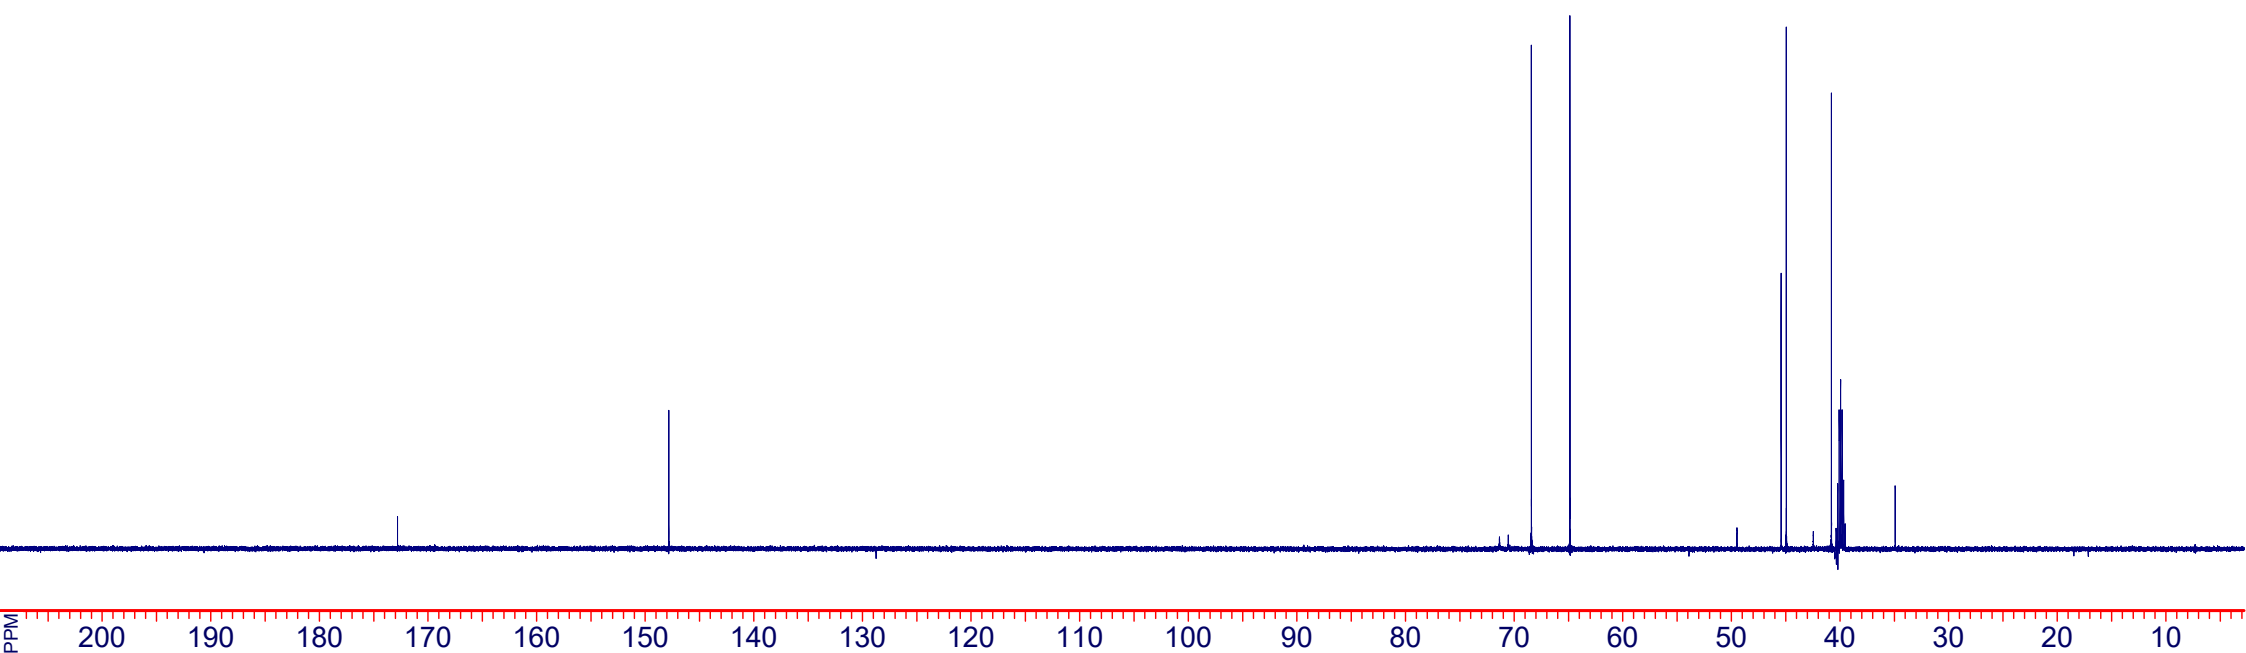

PPM 200 190 180 170 160 150 140 130 120 110 100 90 80 70 60 50 40 30 20 10

File name: lv-6\_C13APT.fid

Operator:

SF: 150.8333 MHz

NSC: 0

PW: 4.63 usec, RG: 60

SI: 131072

Date: 31-May-2022

Solvent: dms0

SW: 39063 Hz

TE: 298 K

AQ: 0.87 sec, RD: 0.00 sec



7.553  
7.532  
7.286  
7.267  
7.252  
7.158  
7.139  
7.121

3.956  
3.942  
3.927  
3.789  
3.774  
3.760  
3.380

2.812  
2.797  
2.780  
2.596  
2.579  
2.565  
2.502

lv-527.fid

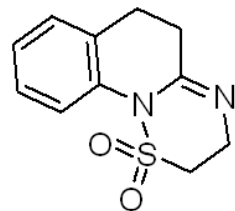**8e** DMSO-d6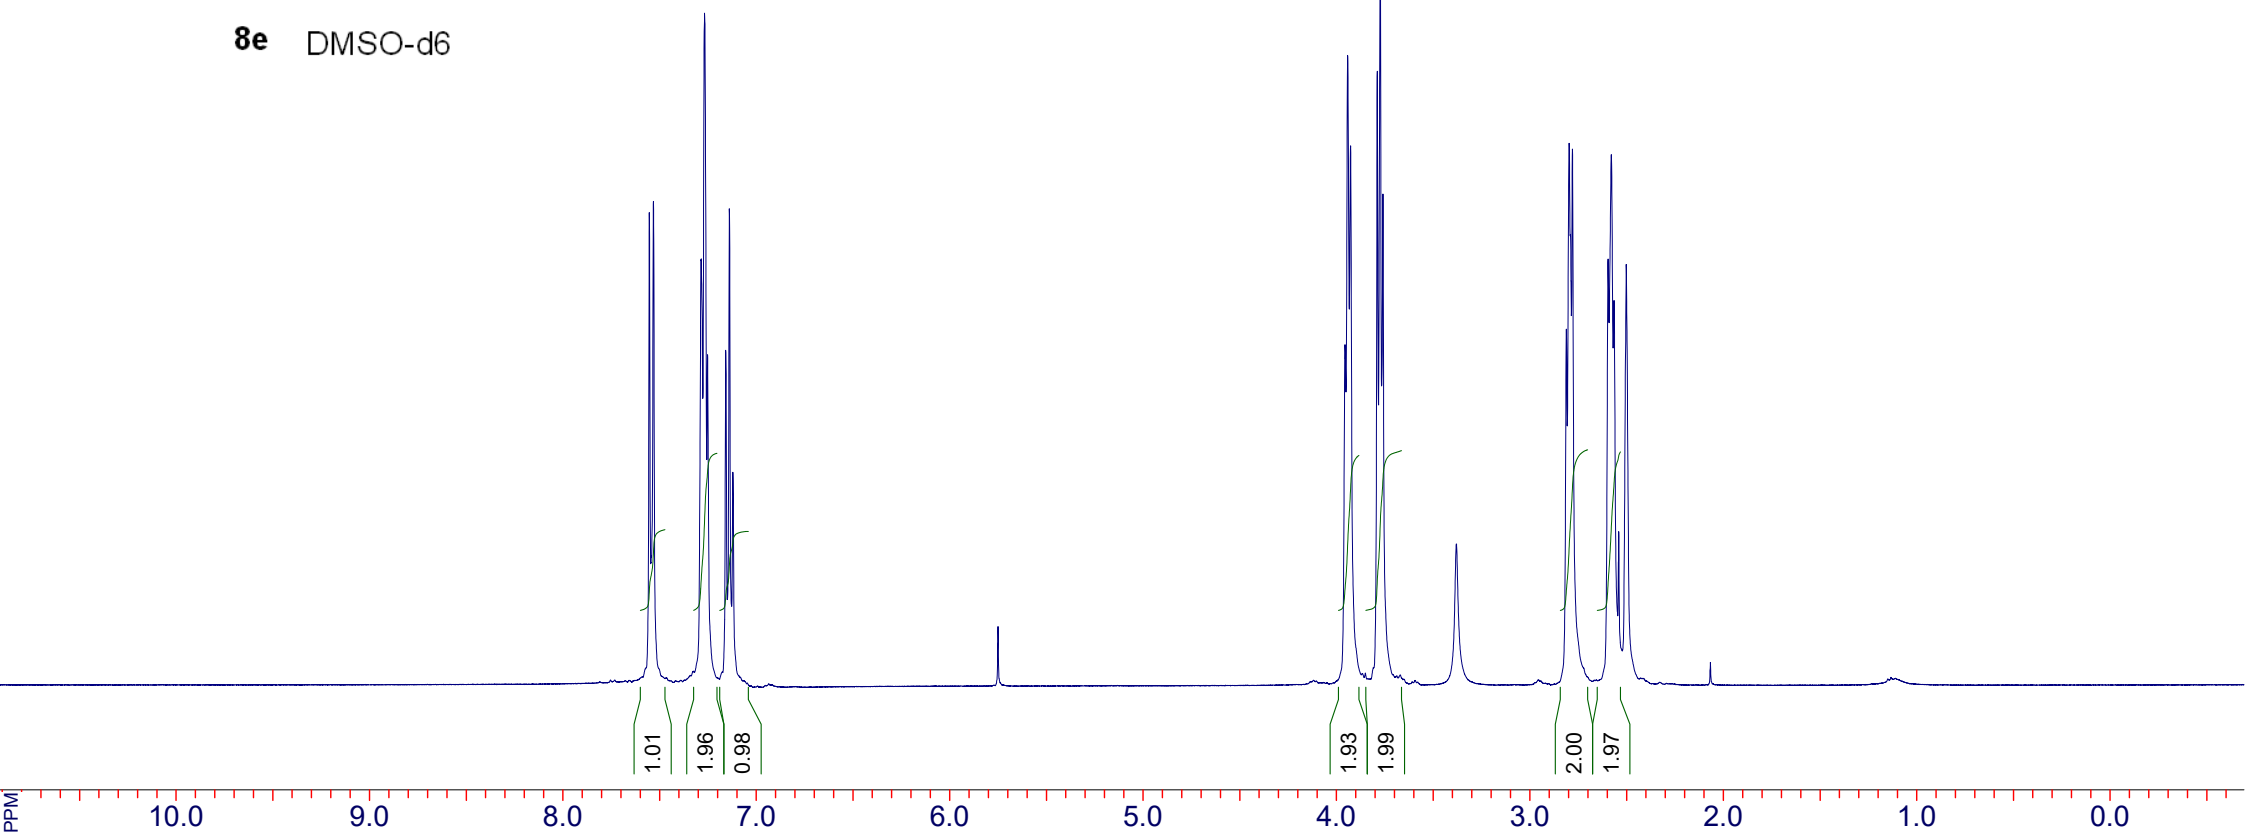

File name: lv-527.fid

Operator:

SF: 399.9733 MHz

NSC: 0

PW: 10.90 usec, RG: 24

SI: 32768

Date: 03-Oct-2022

Solvent: dms0

SW: 8000 Hz

TE: 298 K

AQ: 2.00 sec, RD: 0.00 sec

PPM

lv-527\_C13

151.06

132.74

130.27

128.19

126.61

124.87

120.31

47.21

43.23

39.55

33.21

25.01

S56

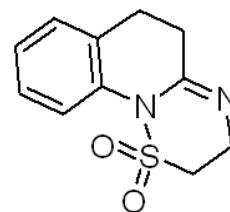**8e** DMSO-d6

PPM

180 170 160 150 140 130 120 110 100 90 80 70 60 50 40 30 20 10 0

File name: lv-527\_C13

Operator: root

SF: 125.6681 MHz

NSC: 96

PW: 0.00 usec, RG: 51200

SI: 131072

Date: 03-Oct-2022

Solvent: DMSO

SW: 32680 Hz

TE: 683 K

AQ: 0.78 sec, RD: 0.00 sec

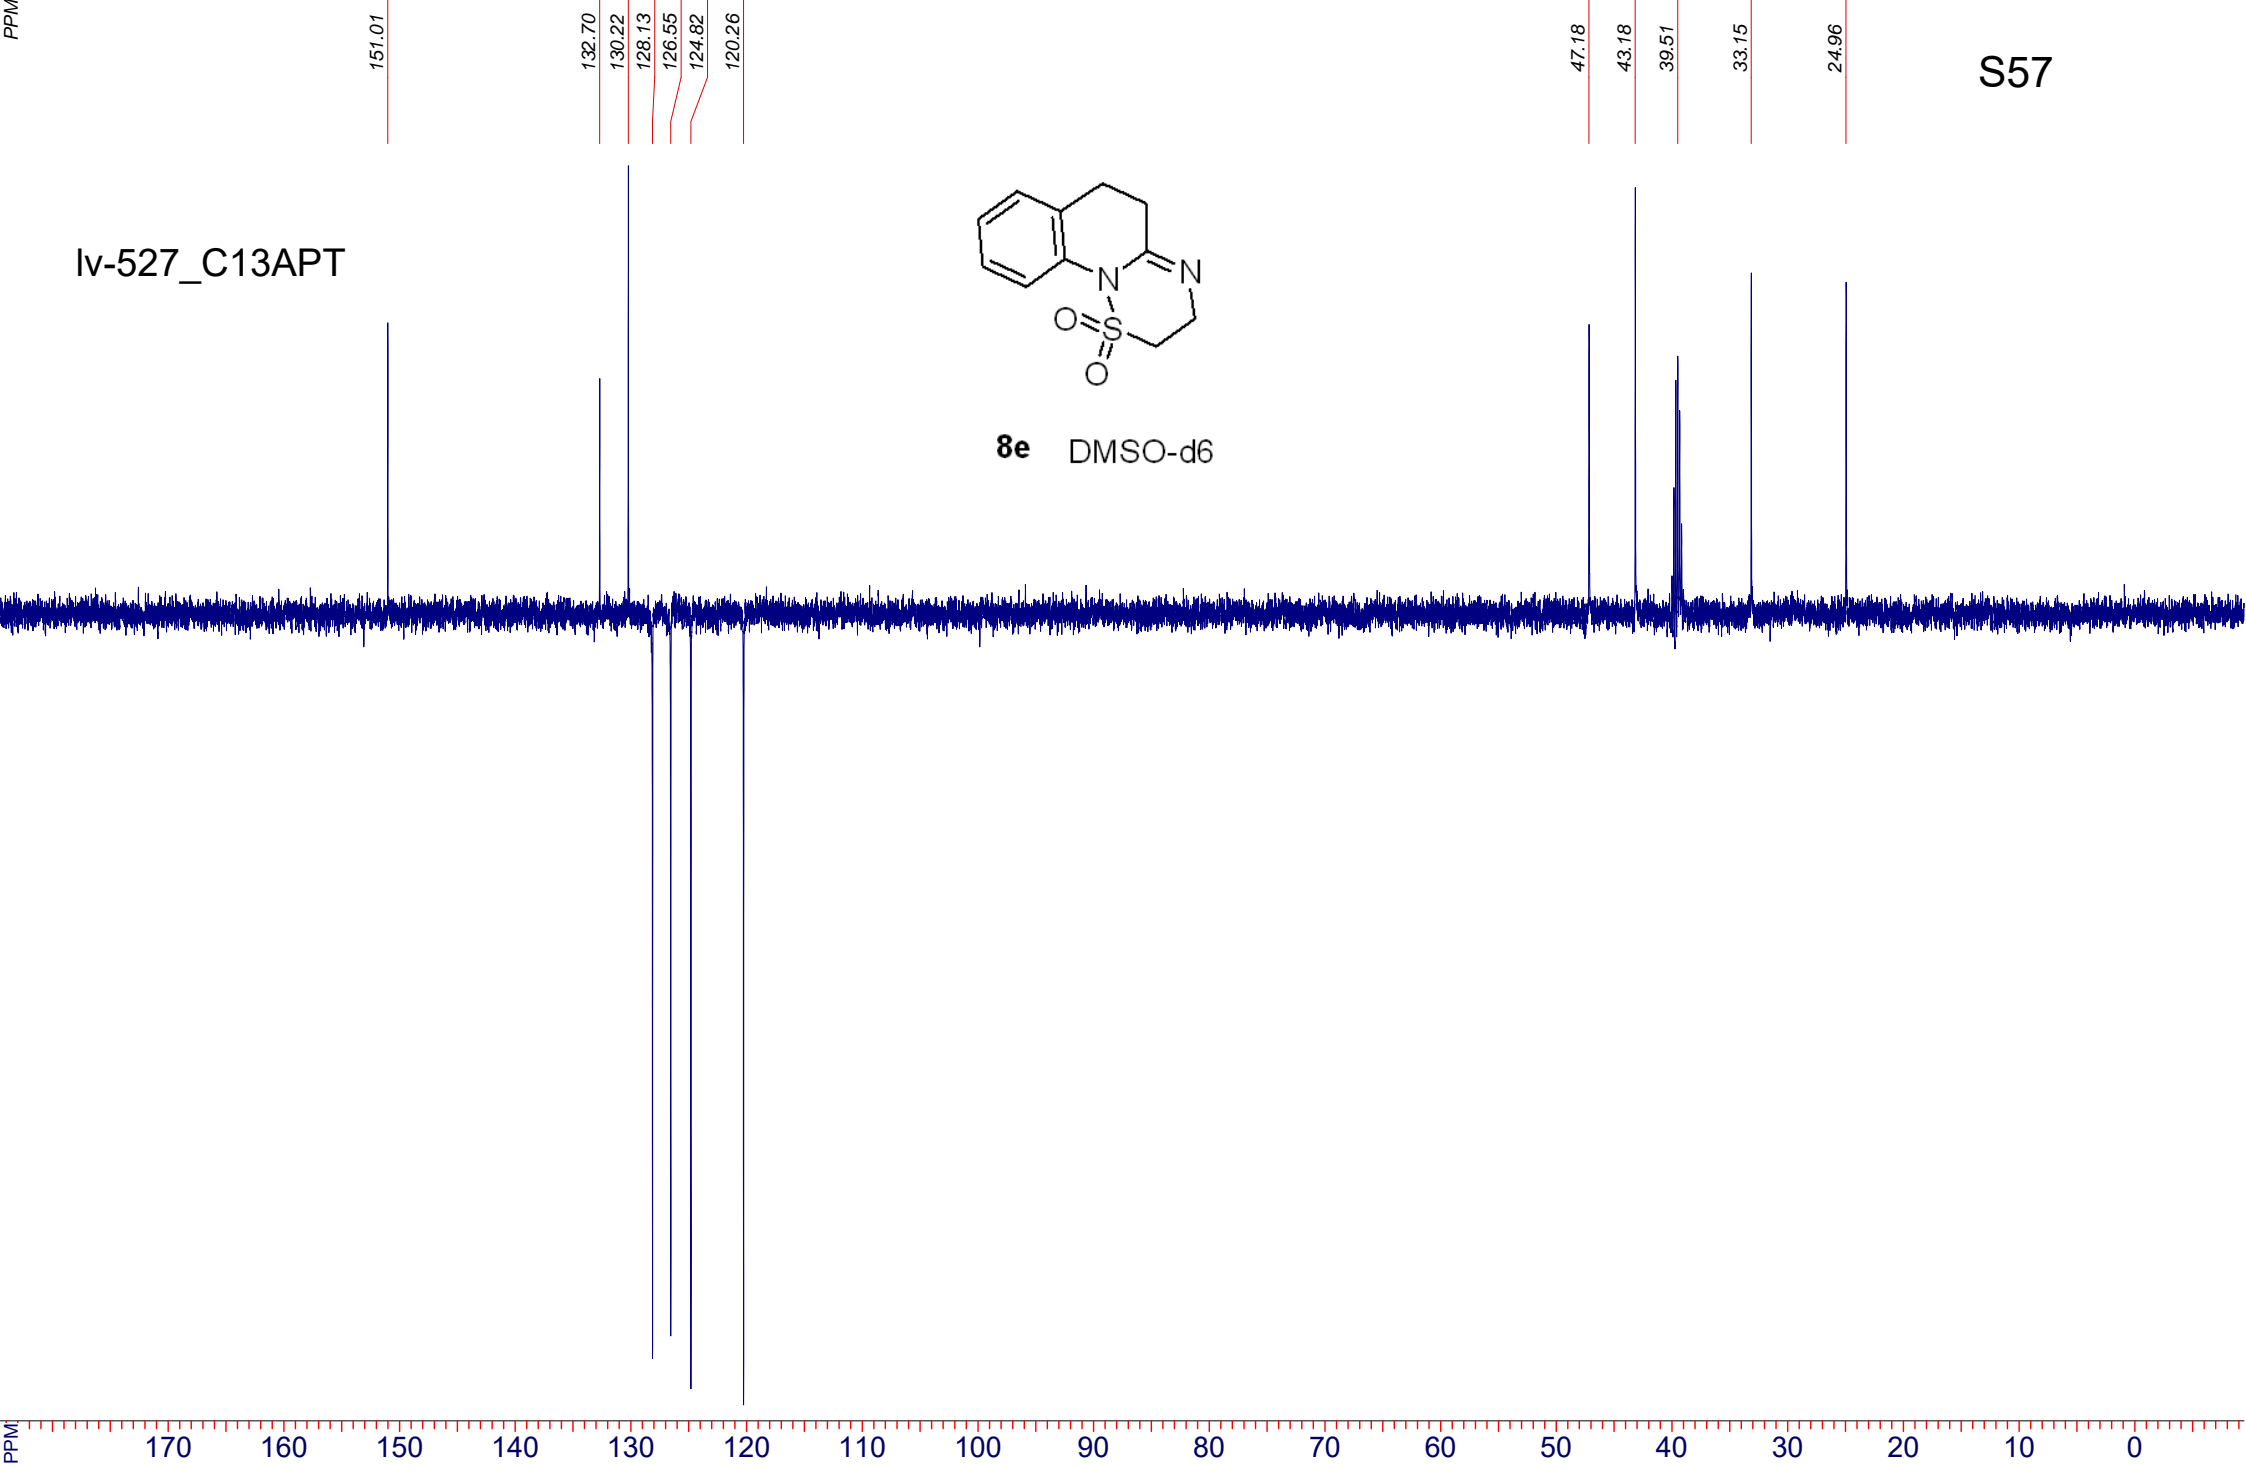

lv-527\_C13APT

**8e** DMSO-d6

S57

|                          |                |                  |           |                            |           |
|--------------------------|----------------|------------------|-----------|----------------------------|-----------|
| File name: lv-527_C13APT | Operator: root | SF: 125.6681 MHz | NSC: 77   | PW: 0.00 usec, RG: 51200   | SI: 65536 |
| Date: 03-Oct-2022        | Solvent: DMSO  | SW: 32680 Hz     | TE: 683 K | AQ: 1.57 sec, RD: 0.00 sec |           |

3.823  
3.808  
3.793  
3.711  
3.697  
3.404  
3.388  
3.373  
2.522  
2.506  
1.599

S58

lv-3

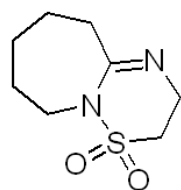**8f** DMSO-d6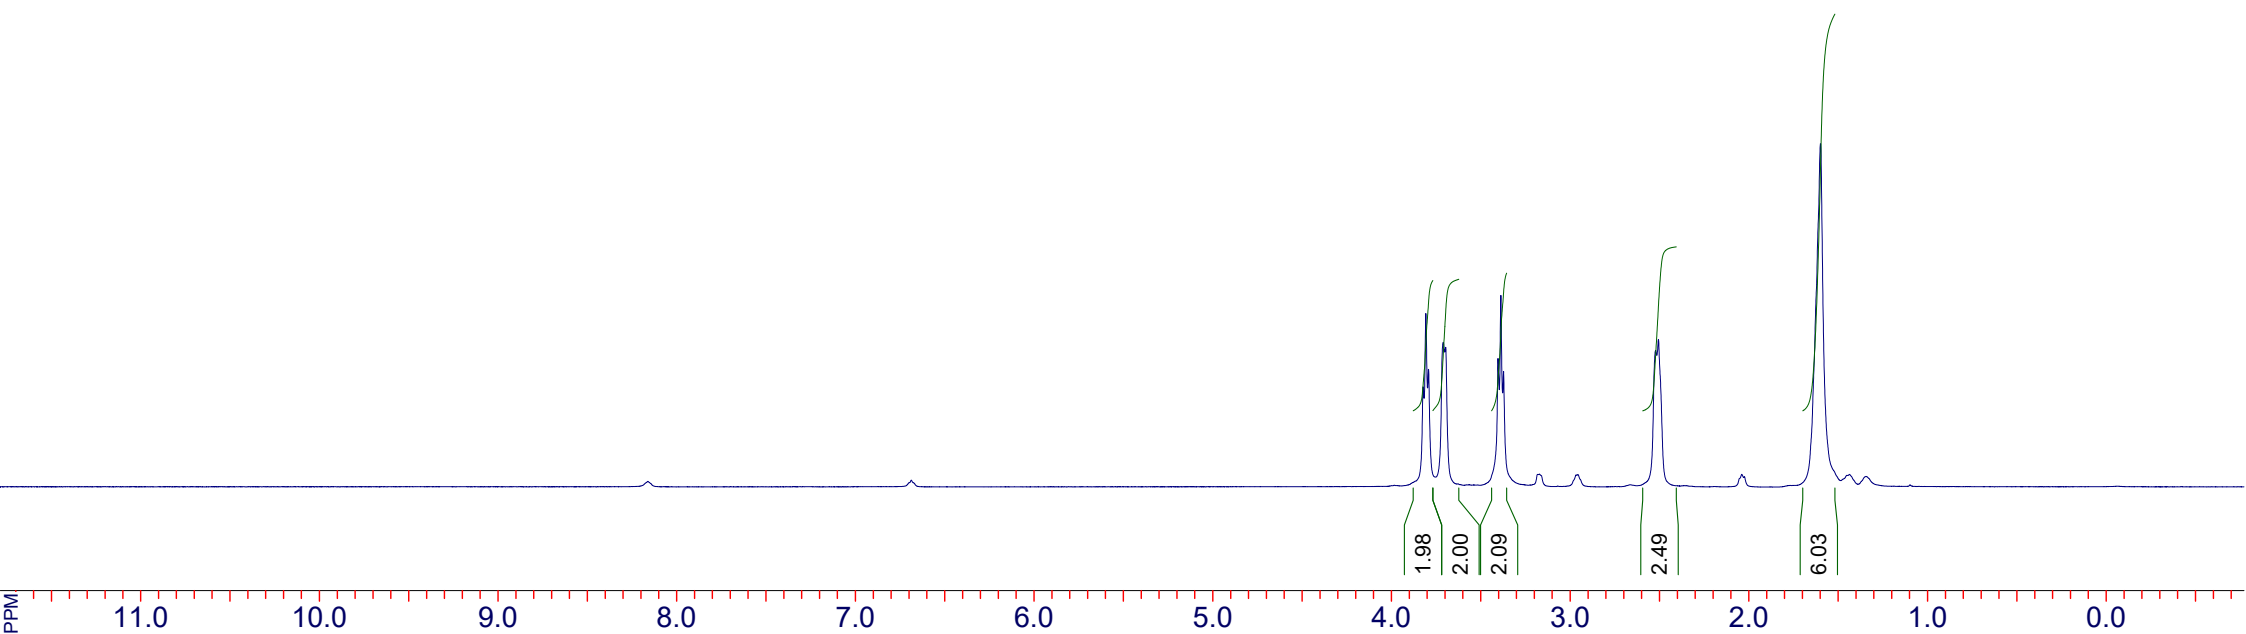

File name: lv-3

Operator: nmr

SF: 400.1300 MHz

NSC: 1

PW: 0.00 usec, RG: 25

SI: 32768

Date: 26-May-2022

Solvent: DMSO

SW: 8224 Hz

TE: 300 K

AQ: 1.99 sec, RD: 0.00 sec

lv-3\_C13.fid

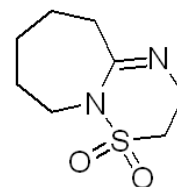**8f** DMSO-d6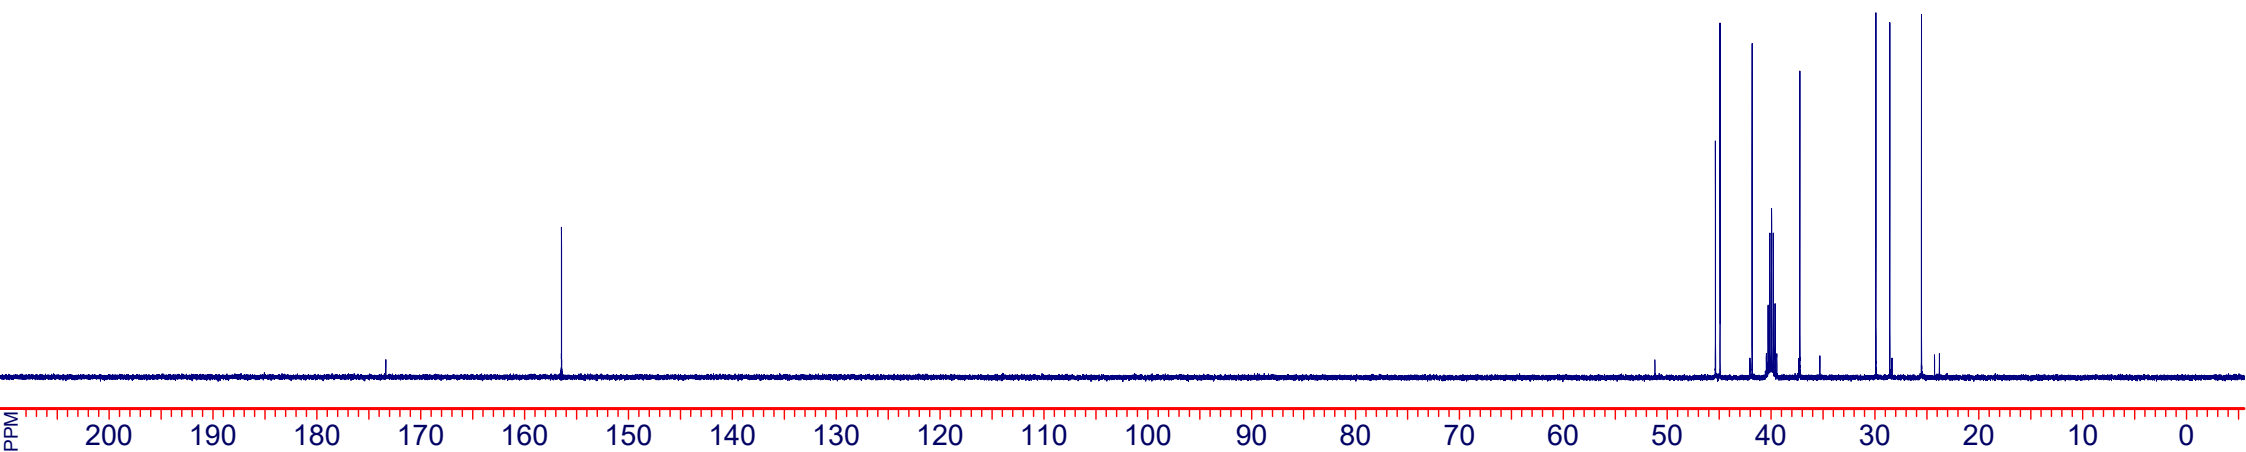

File name: lv-3\_C13.fid

Operator:

SF: 125.6926 MHz

NSC: 0

PW: 3.27 usec, RG: 60

SI: 65536

Date: 26-May-2022

Solvent: dms0

SW: 31250 Hz

TE: 298 K

AQ: 1.05 sec, RD: 0.00 sec

lv-3\_C13APT.fid

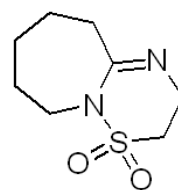**8f** DMSO-d6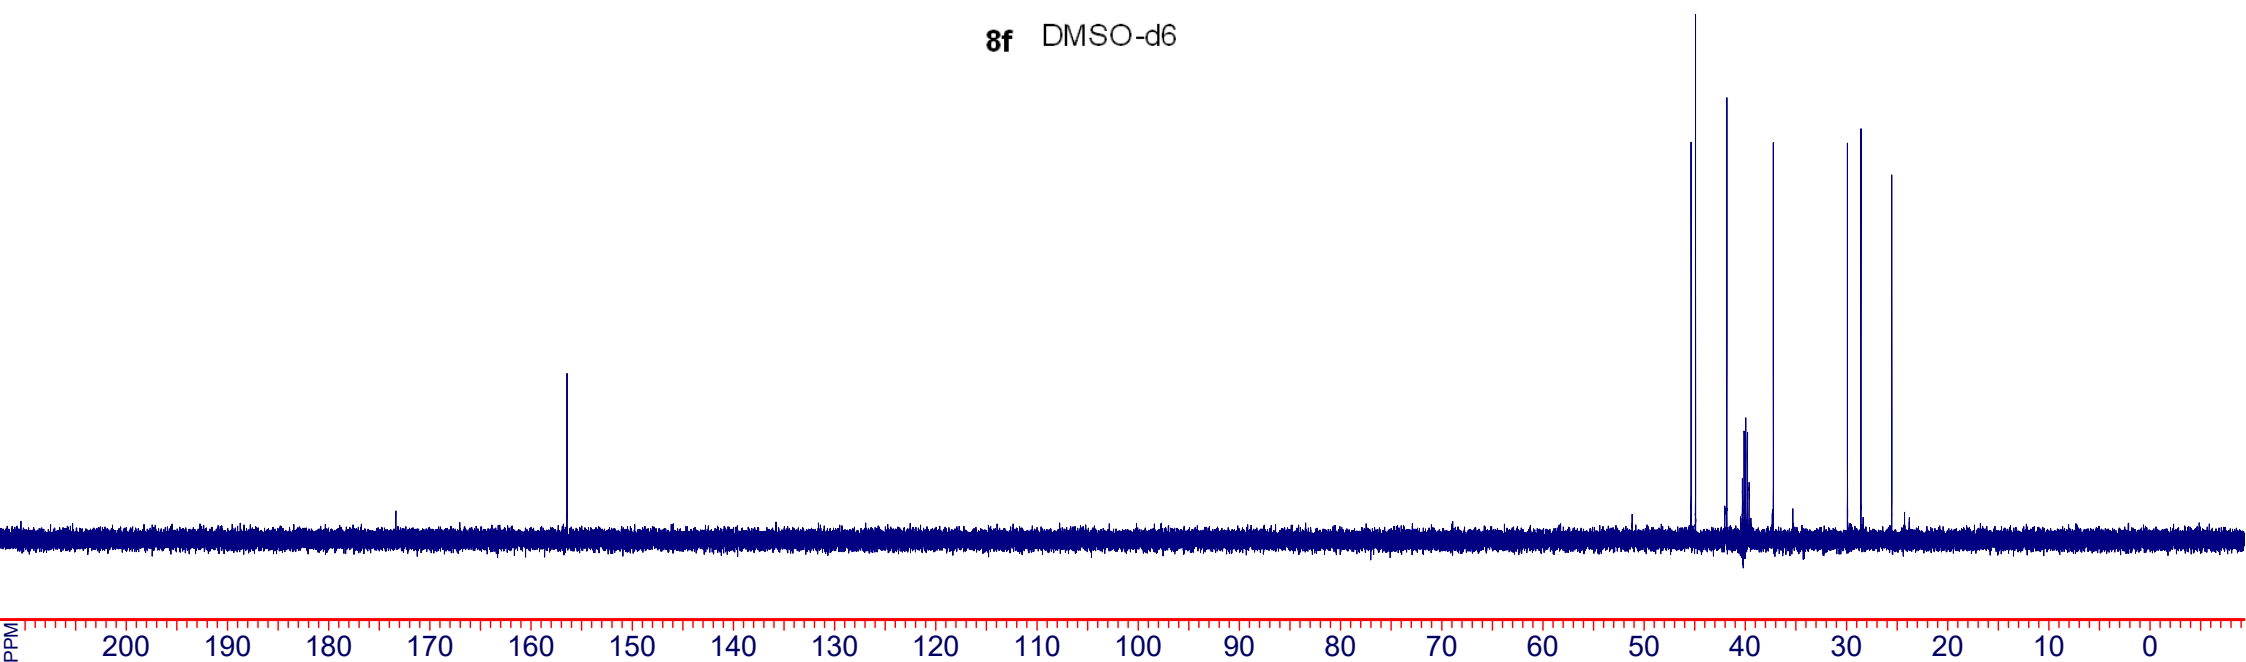

PPM 200 190 180 170 160 150 140 130 120 110 100 90 80 70 60 50 40 30 20 10 0

File name: lv-3\_C13APT.fid

Operator:

SF: 125.6925 MHz

NSC: 0

PW: 5.00 usec, RG: 60

SI: 131072

Date: 26-May-2022

Solvent: dms0

SW: 32895 Hz

TE: 298 K

AQ: 1.95 sec, RD: 0.00 sec

Automated Probe tuning parameter

PPM

lv-2

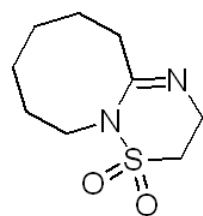**8g** DMSO-d6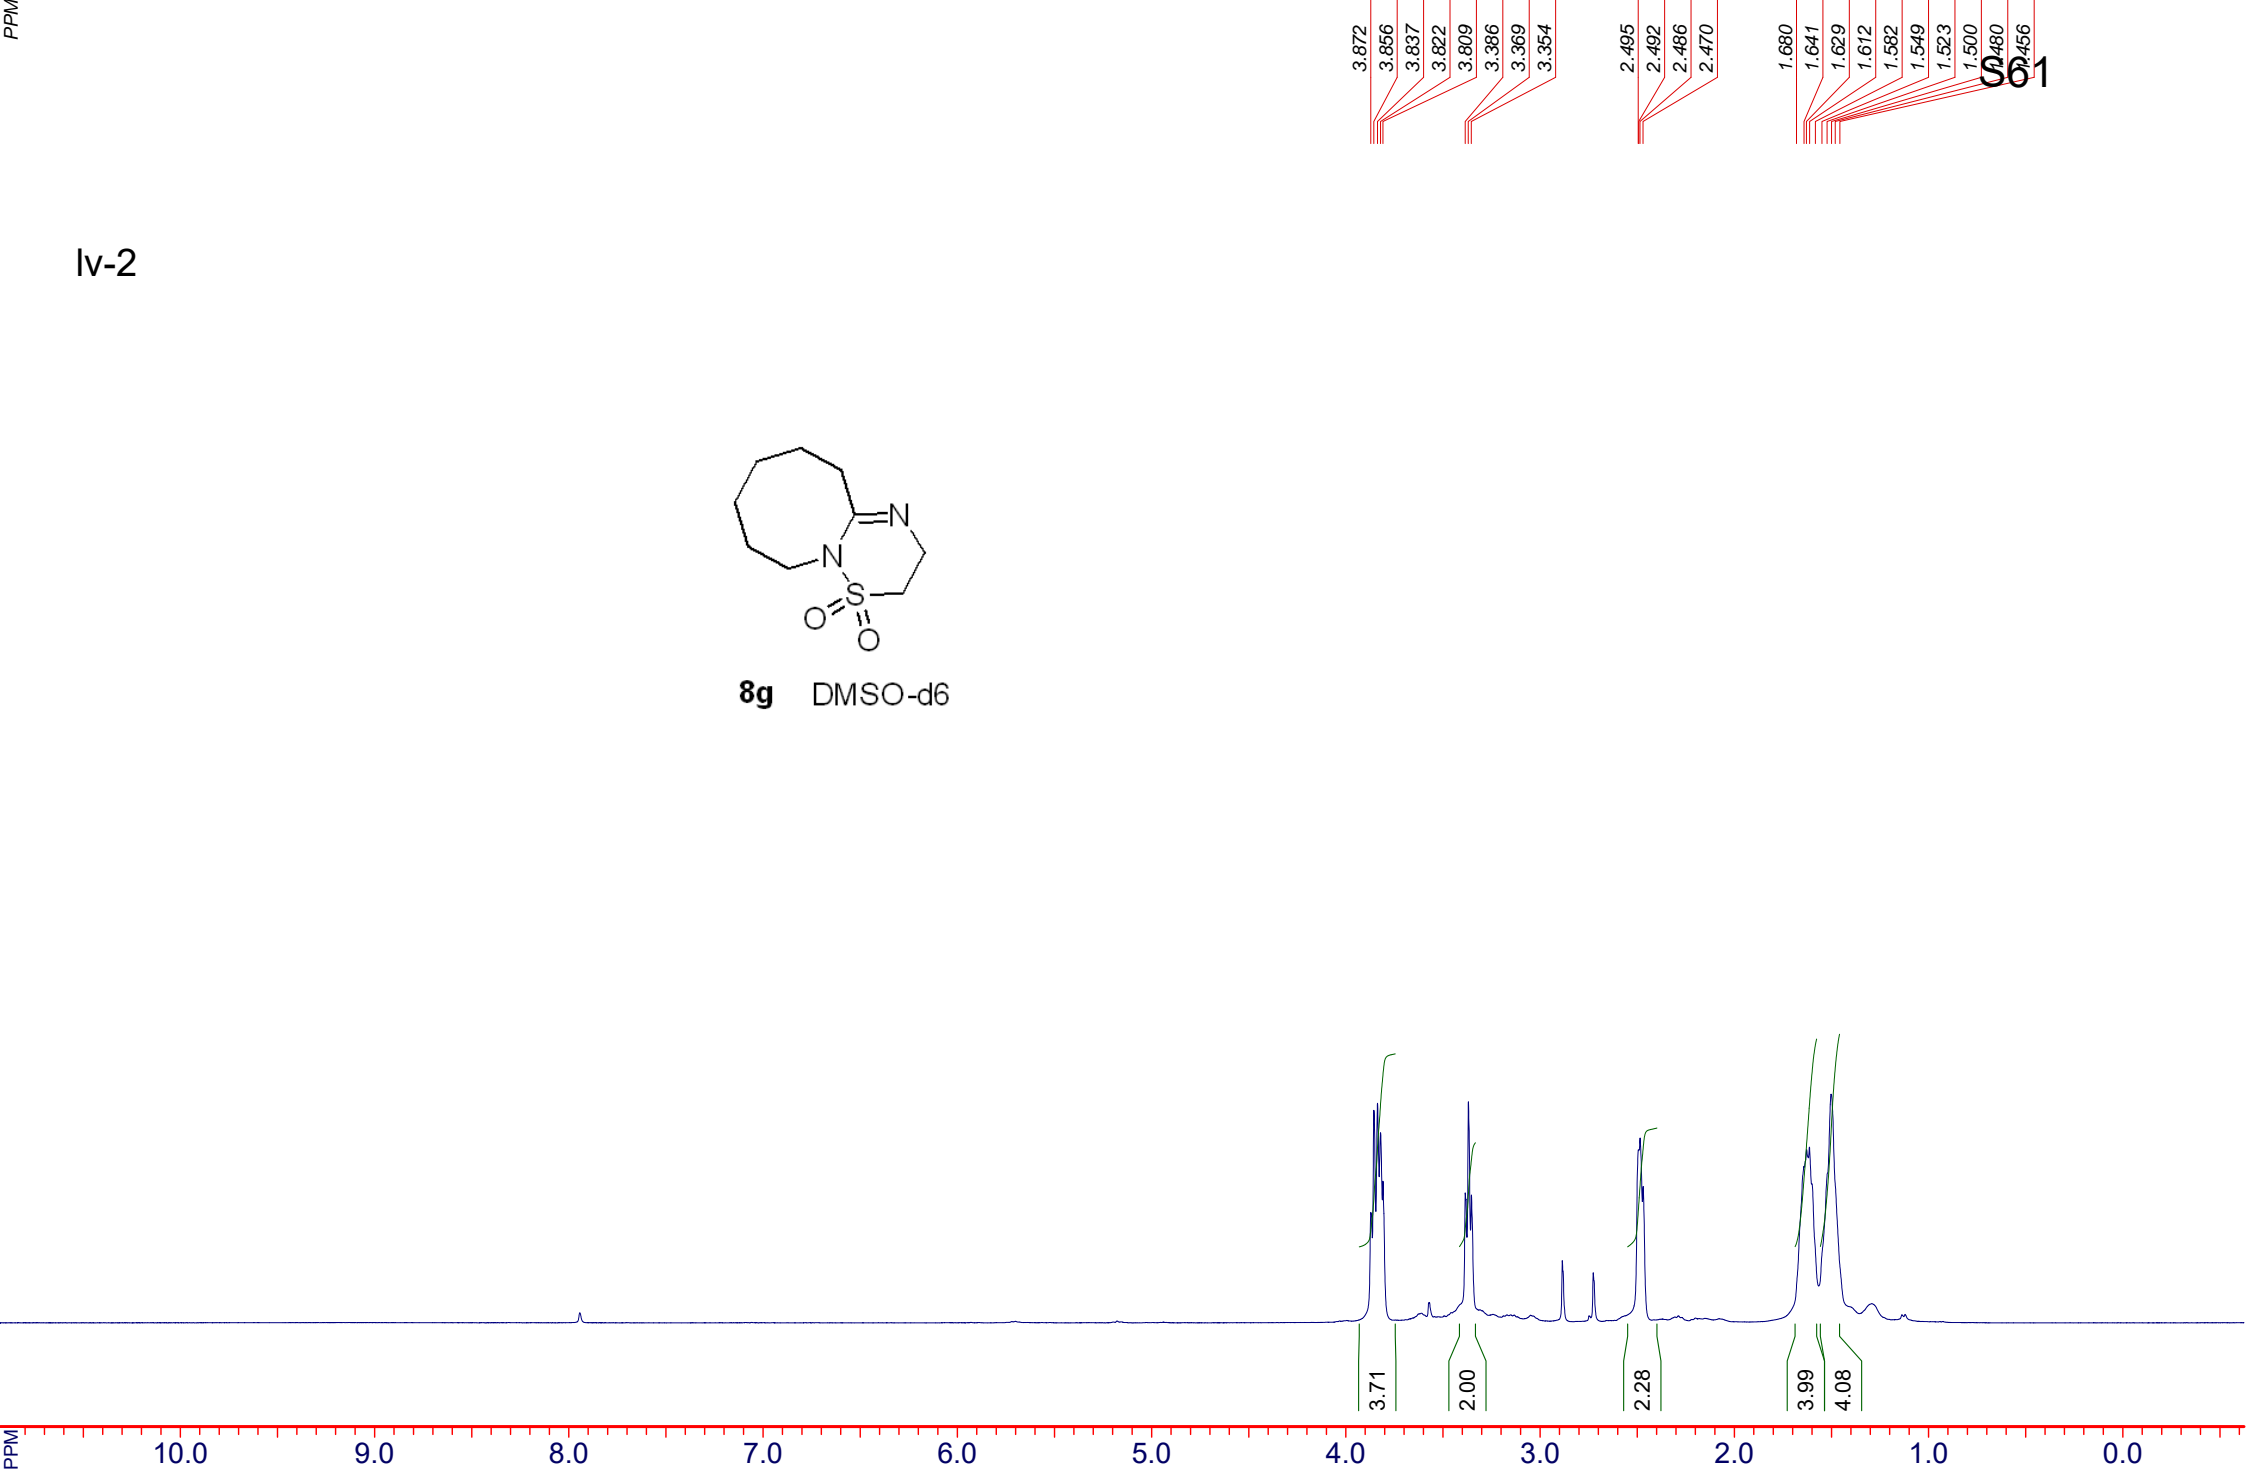

PPM

File name: lv-2

Operator: nmr

SF: 400.1300 MHz

NSC: 1

PW: 0.00 usec, RG: 25

SI: 32768

Date: 27-May-2022

Solvent: DMSO

SW: 8224 Hz

TE: 300 K

AQ: 1.99 sec, RD: 0.00 sec

lv-2\_C13

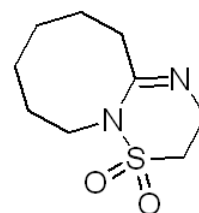**8g** DMSO-d6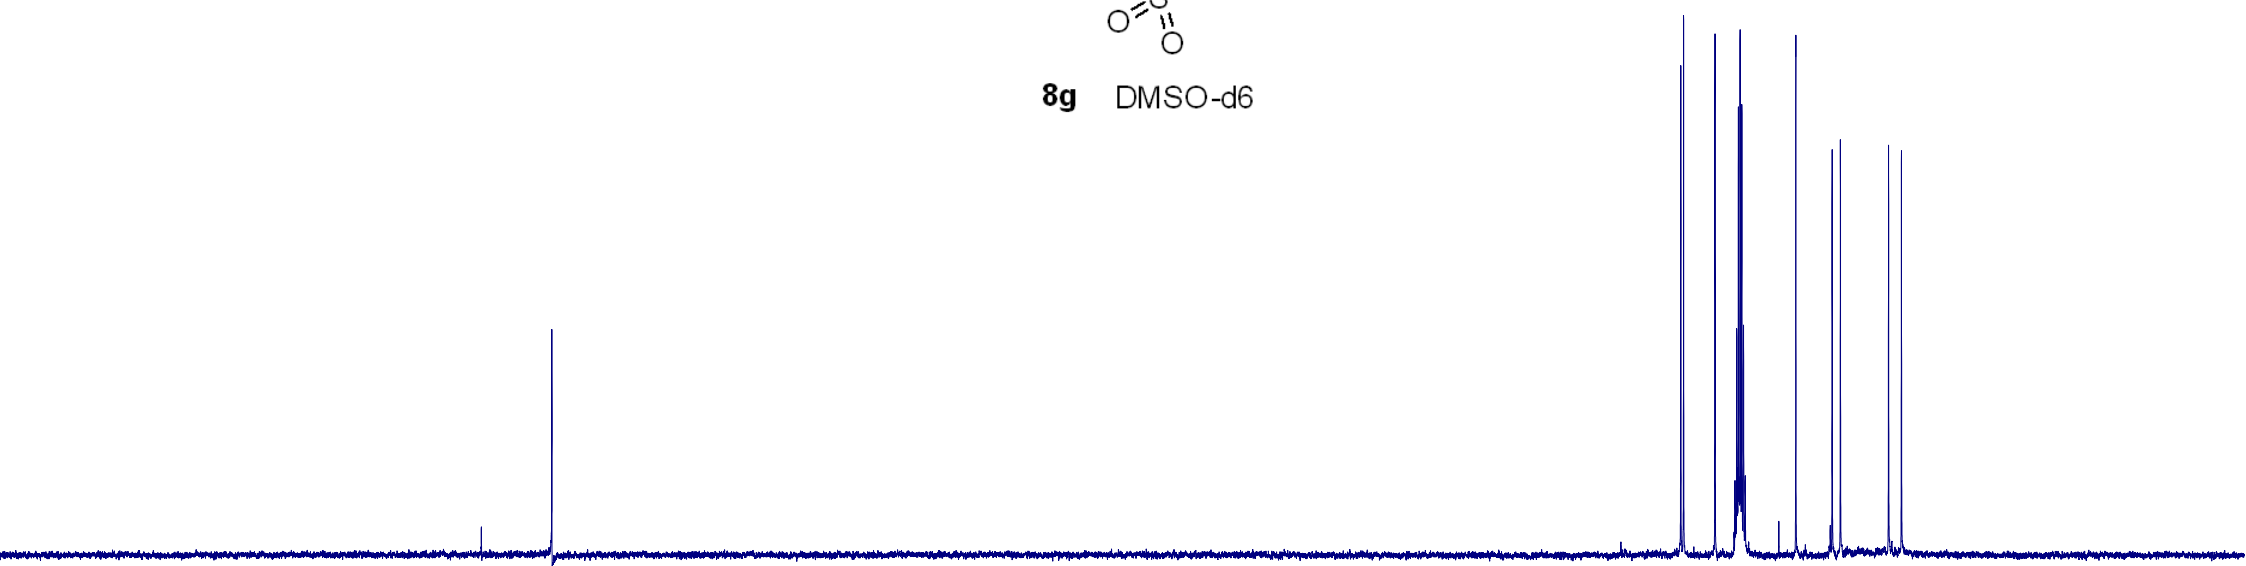

PPM 200 190 180 170 160 150 140 130 120 110 100 90 80 70 60 50 40 30 20 10 0

File name: lv-2\_C13

Operator: root

SF: 125.6681 MHz

NSC: 356

PW: 0.00 usec, RG: 51200

SI: 131072

Date: 28-May-2022

Solvent: DMSO

SW: 32680 Hz

TE: 683 K

AQ: 0.78 sec, RD: 0.00 sec



lv-2\_C13APT

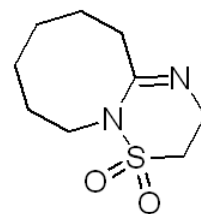**8g** DMSO-d6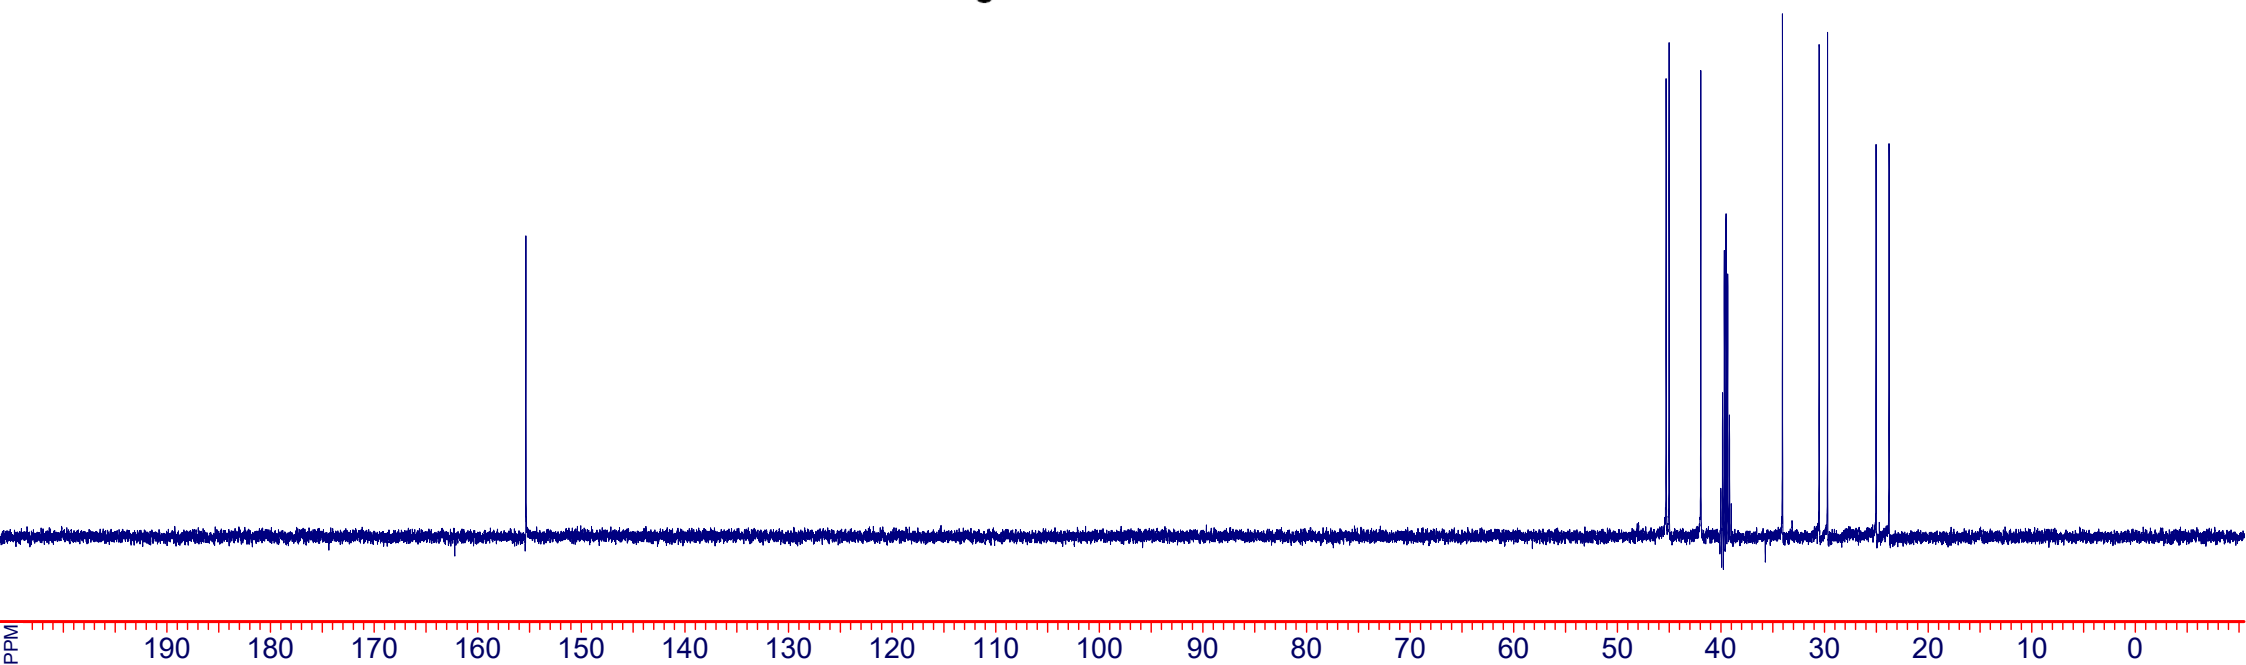

File name: lv-2\_C13APT

Operator: root

SF: 125.6681 MHz

NSC: 200

PW: 0.00 usec, RG: 51200

SI: 65536

Date: 28-May-2022

Solvent: DMSO

SW: 32680 Hz

TE: 683 K

AQ: 1.00 sec, RD: 0.00 sec

PPM

lv-10

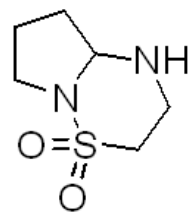

9a DMSO-d6

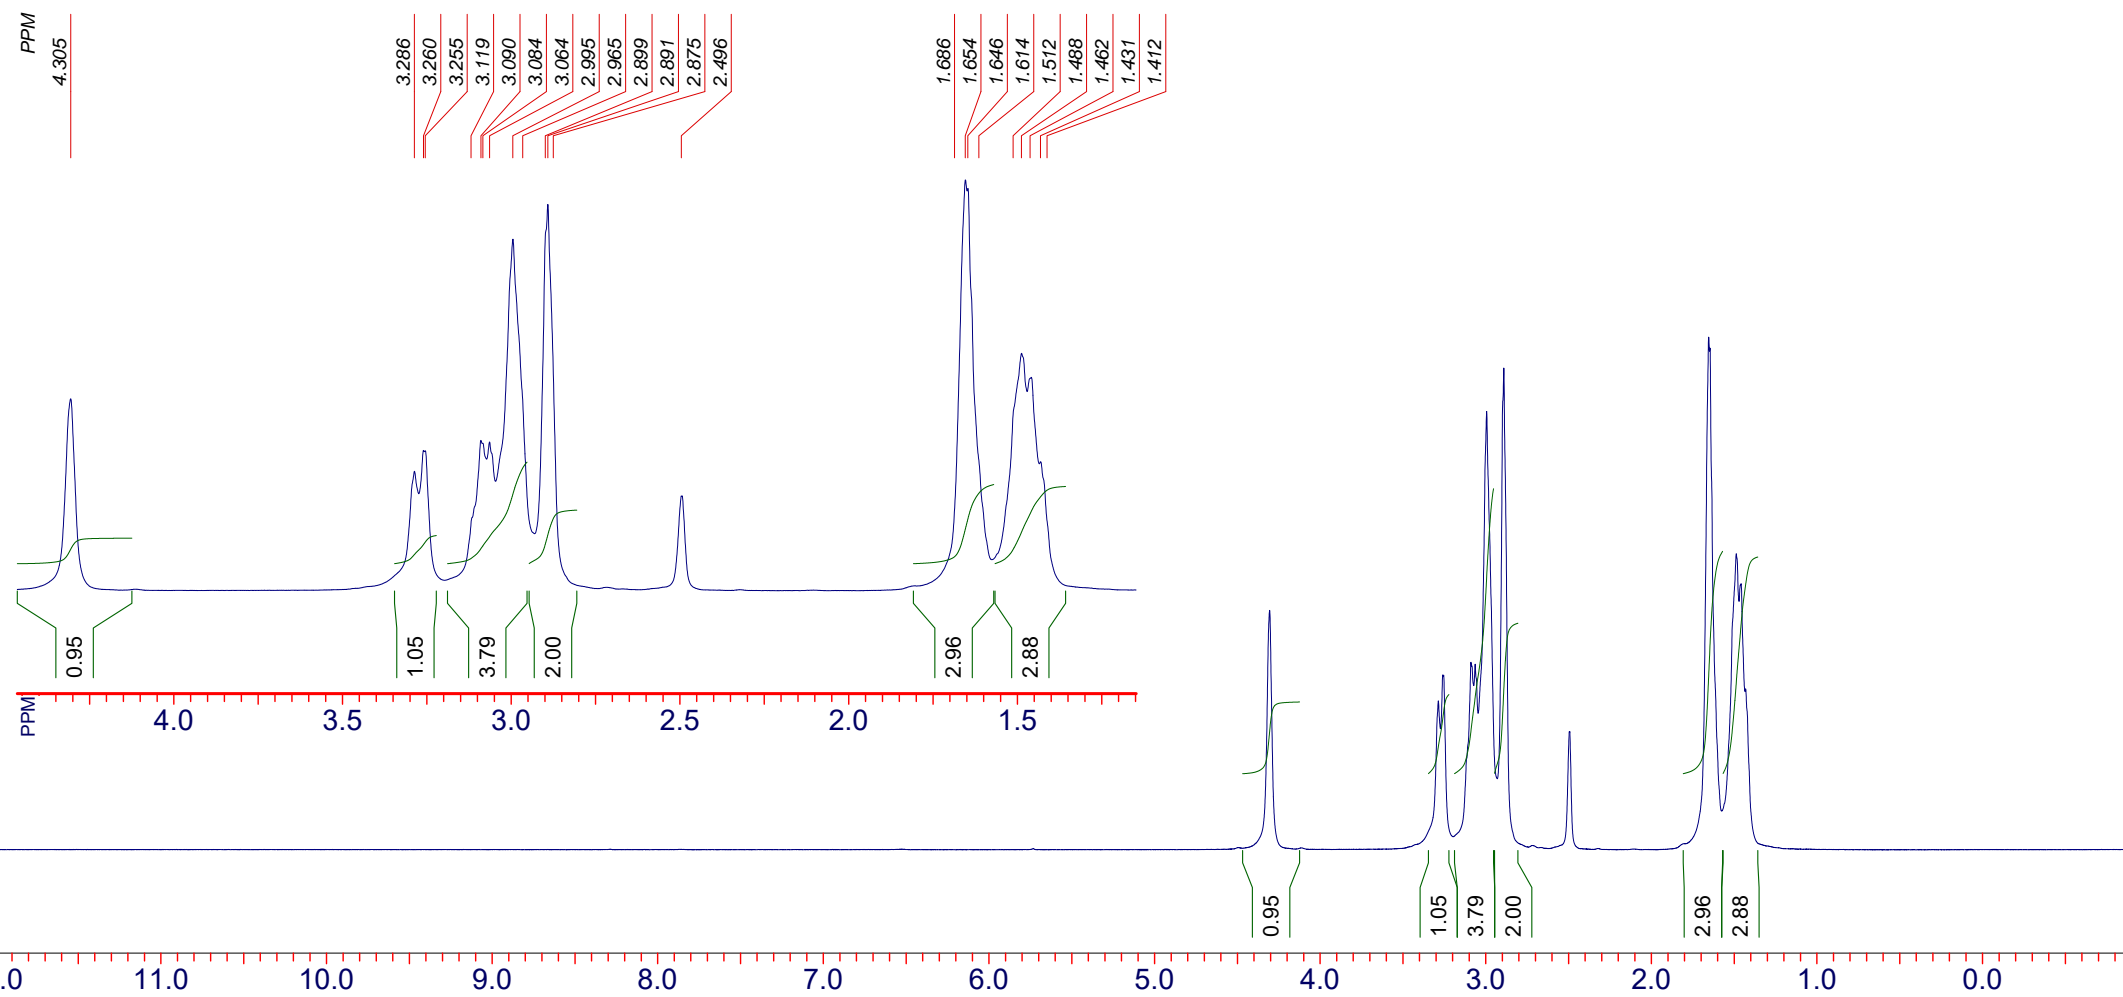

4.305

3.286

3.260

3.255

3.119

3.090

3.084

3.064

2.995

2.965

2.899

2.891

2.875

2.496

1.686

1.654

1.646

1.614

1.512

1.488

1.462

1.431

1.412

PPM

4.305

3.286

3.260

3.255

3.119

3.090

3.084

3.064

2.995

2.965

2.899

2.891

2.875

2.496

1.686

1.654

1.646

1.614

1.512

1.488

1.462

1.431

1.412

PPM

4.0

3.5

3.0

2.5

2.0

1.5

PPM

12.0

11.0

10.0

9.0

8.0

7.0

6.0

5.0

4.0

3.0

2.0

1.0

0.0

File name: lv-10

Operator: nmr

SF: 400.1300 MHz

NSC: 1

PW: 0.00 usec, RG: 25

SI: 32768

Date: 26-May-2022

Solvent: DMSO

SW: 8224 Hz

TE: 300 K

AQ: 1.99 sec, RD: 0.00 sec

lv-10\_C13.fid

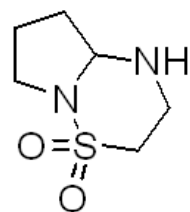**9a** DMSO-d6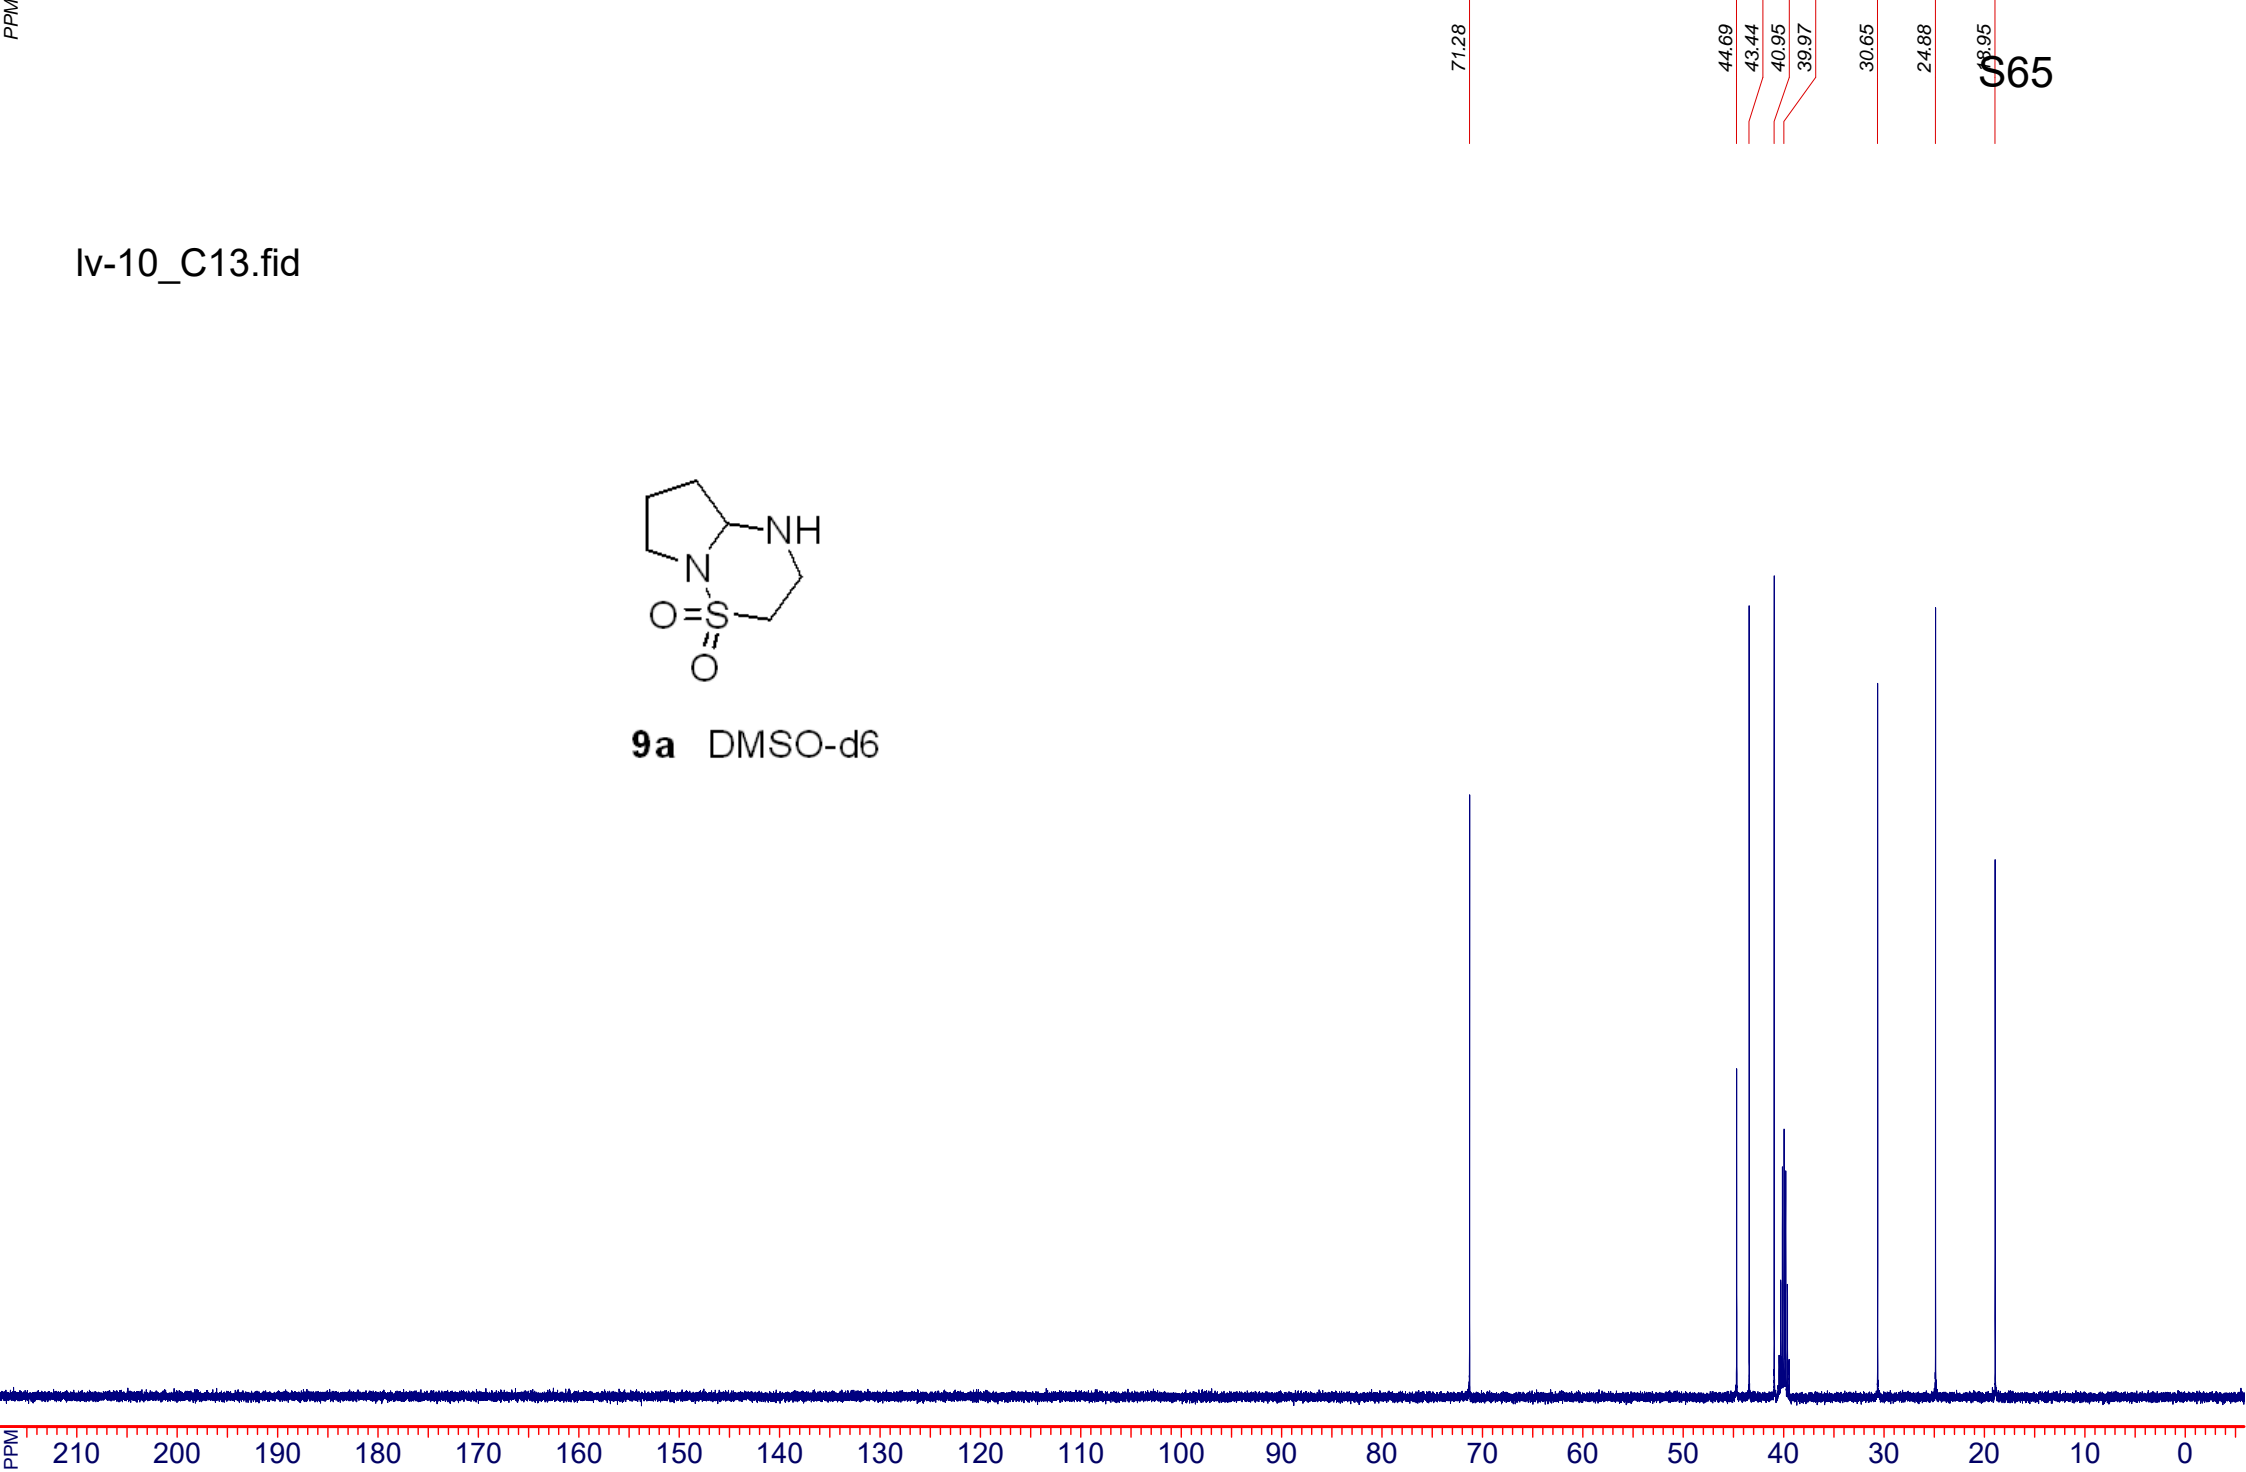

PPM

File name: lv-10\_C13.fid

Operator:

SF: 125.6926 MHz

NSC: 0

PW: 3.27 usec, RG: 60

SI: 65536

Date: 26-May-2022

Solvent: dms0

SW: 31250 Hz

TE: 298 K

AQ: 1.05 sec, RD: 0.00 sec

PPM

lv-10\_C13APT.fid

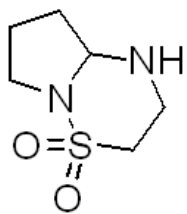**9a** DMSO-d6

71.29

44.70

43.44

40.95

39.97

30.65

24.88

18.95

S66

PPM

190 180 170 160 150 140 130 120 110 100 90 80 70 60 50 40 30 20 10 0

File name: lv-10\_C13APT.fid

Operator:

SF: 125.6925 MHz

NSC: 0

PW: 5.00 usec, RG: 60

SI: 131072

Date: 26-May-2022

Solvent: dms0

SW: 32895 Hz

TE: 298 K

AQ: 1.95 sec, RD: 0.00 sec

Automated Probe tuning parameter

PPM

lv-9

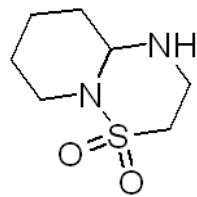

9c DMSO-d6

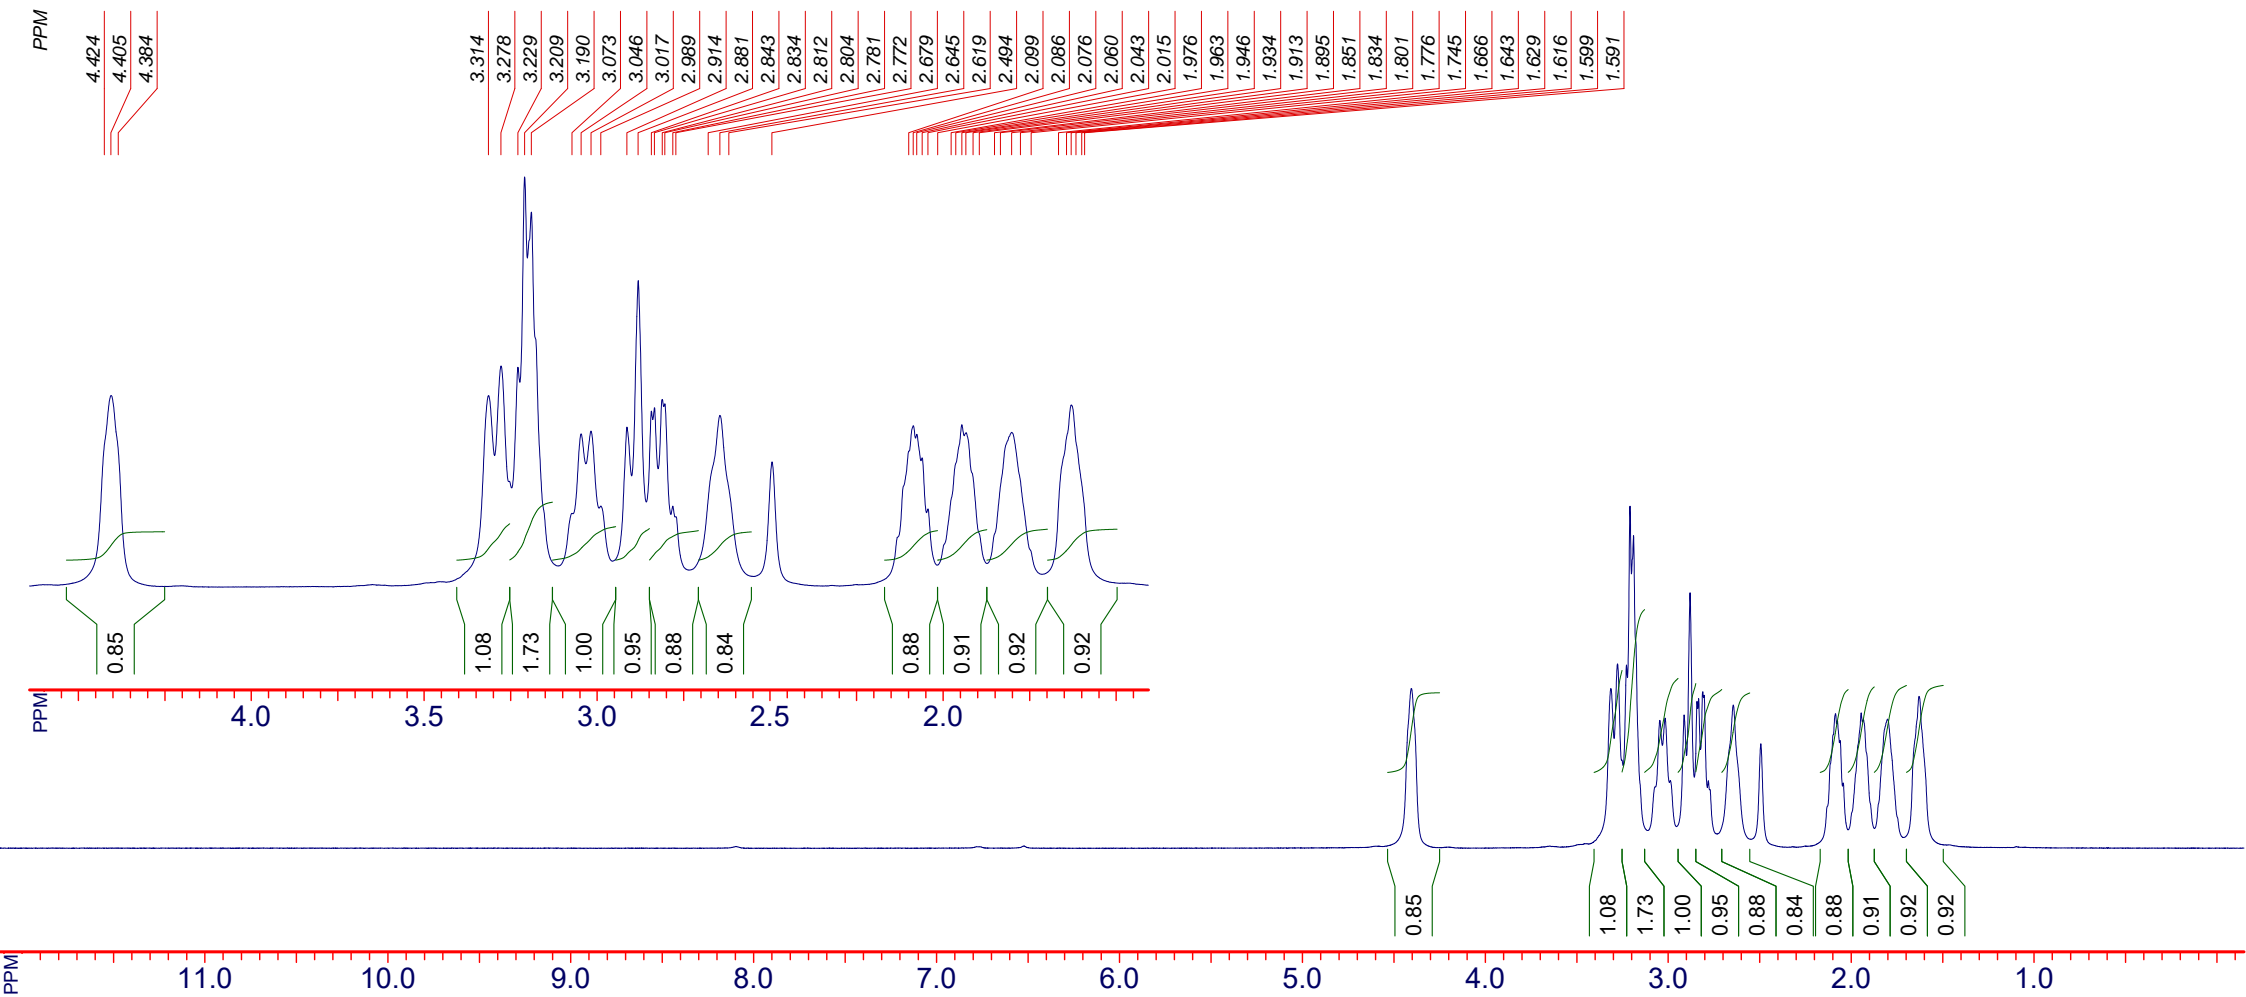

File name: lv-9

Operator: nmr

SF: 400.1300 MHz

NSC: 1

PW: 0.00 usec, RG: 25

SI: 32768

Date: 26-May-2022

Solvent: DMSO

SW: 8224 Hz

TE: 300 K

AQ: 1.99 sec, RD: 0.00 sec

76.71

45.19

45.16

44.00

39.95

31.73

21.27

S68

lv-9\_C13.fid

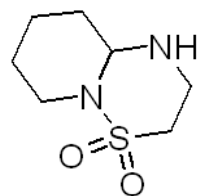**9c** DMSO-d6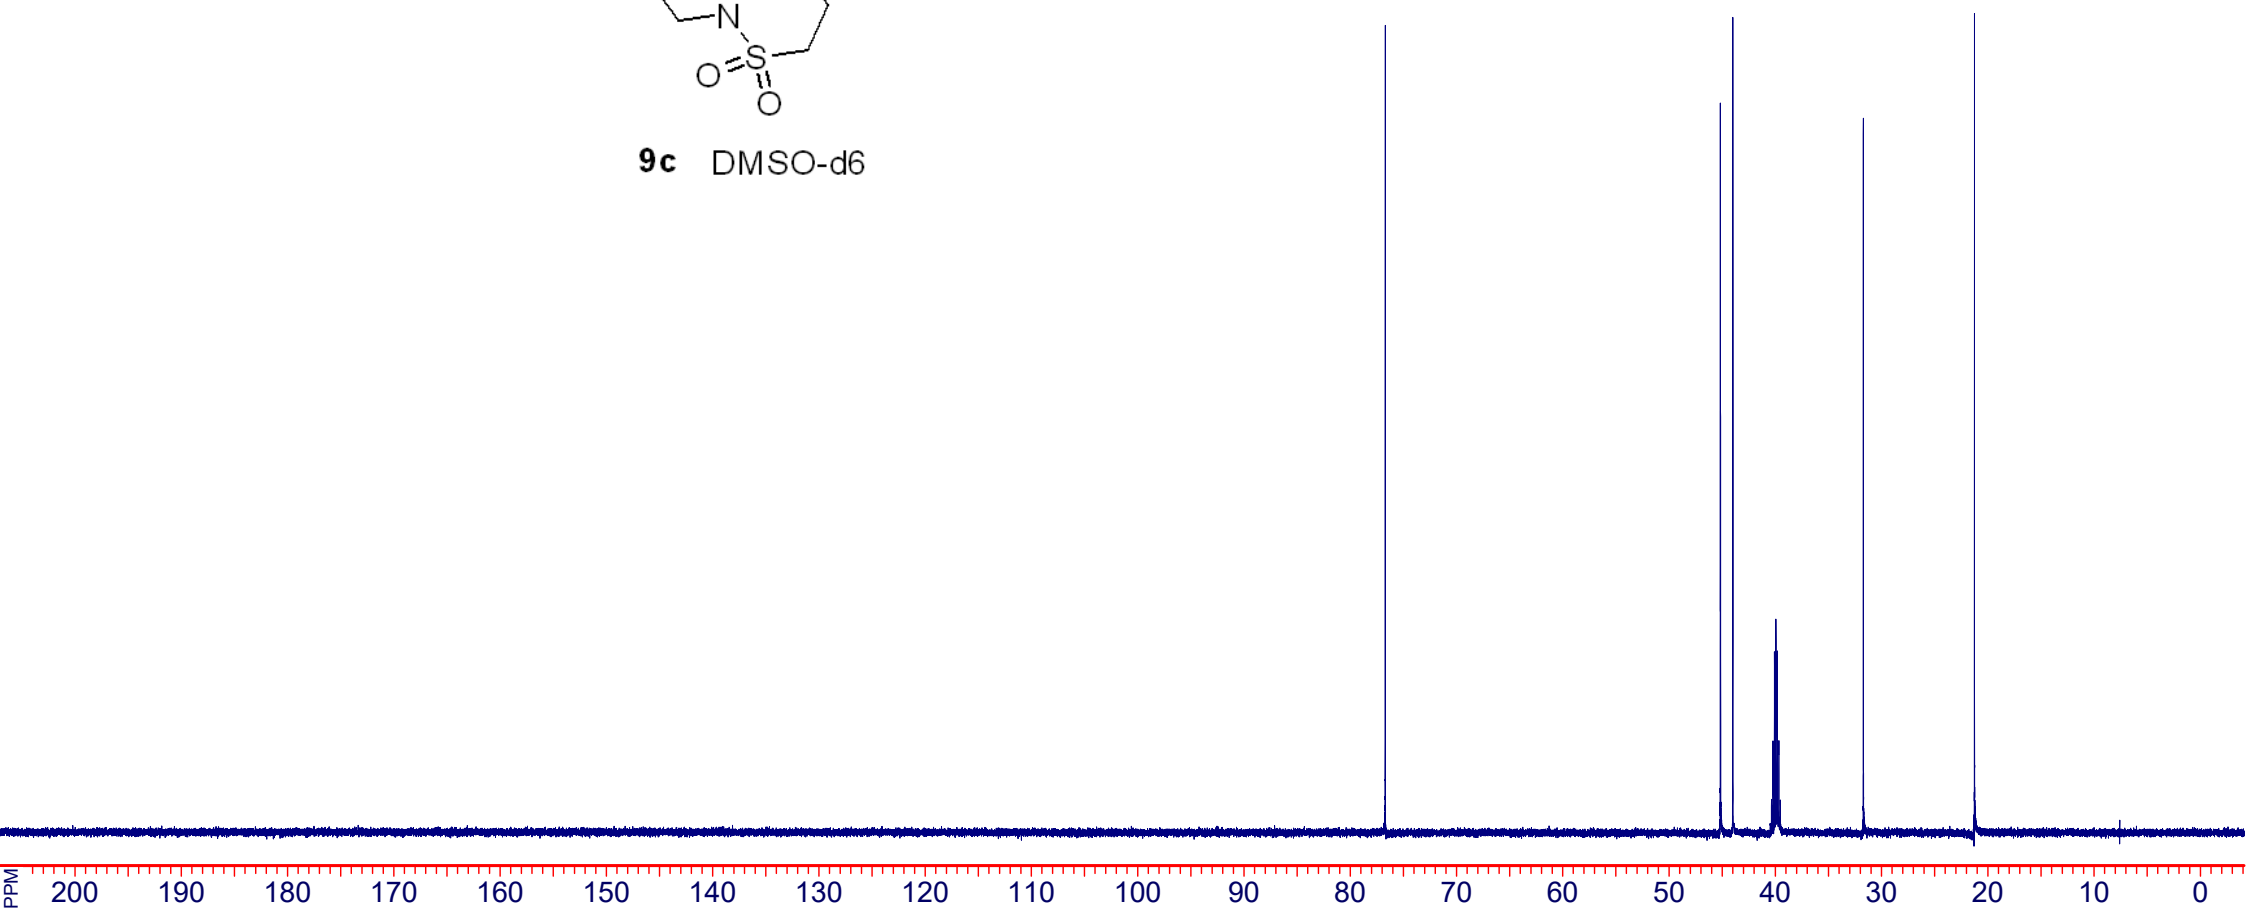

PPM

File name: lv-9\_C13.fid

Operator:

SF: 150.8304 MHz

NSC: 0

PW: 3.09 usec, RG: 60

SI: 65536

Date: 26-May-2022

Solvent: dms0

SW: 37879 Hz

TE: 298 K

AQ: 0.87 sec, RD: 0.00 sec

PPM

lv-9\_C13APT.fid

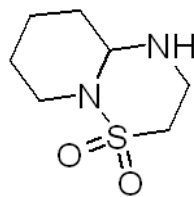

9c DMSO-d6

76.71

45.18

45.17

44.01

39.96

31.73

21.27

569

PPM

200 190 180 170 160 150 140 130 120 110 100 90 80 70 60 50 40 30 20 10

File name: lv-9\_C13APT.fid

Operator:

SF: 150.8333 MHz

NSC: 0

PW: 4.63 usec, RG: 60

SI: 131072

Date: 26-May-2022

Solvent: dmso

SW: 39063 Hz

TE: 298 K

AQ: 0.87 sec, RD: 0.00 sec

PPM

lv-11

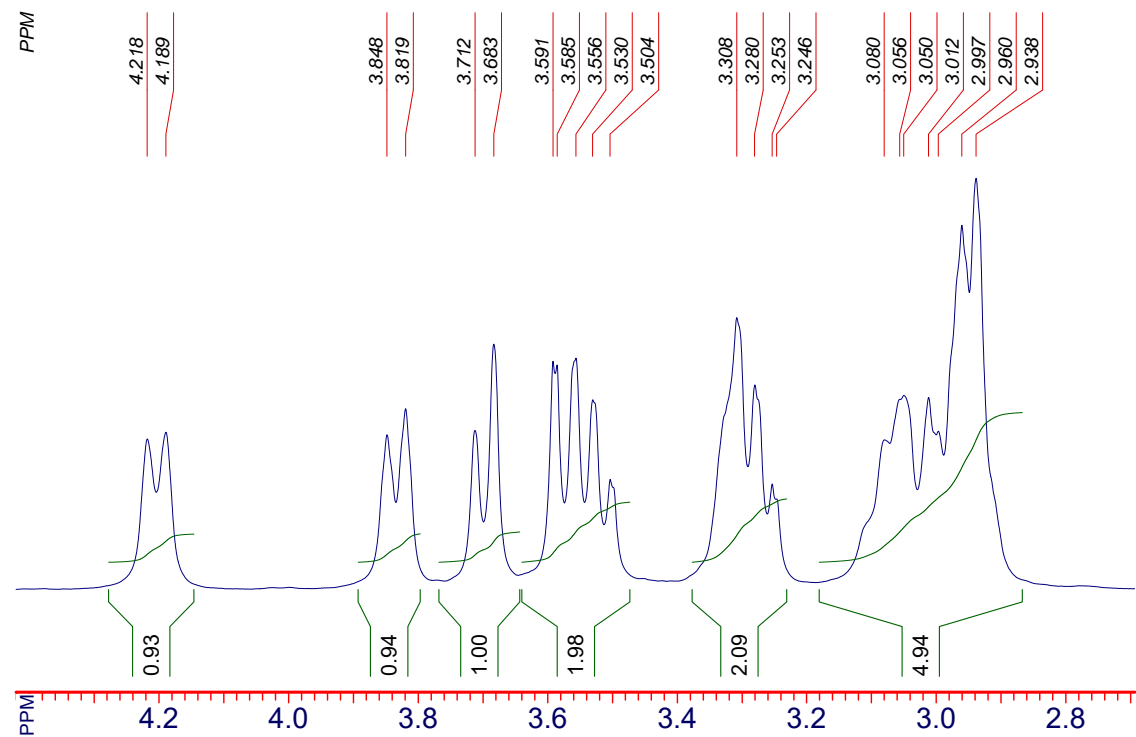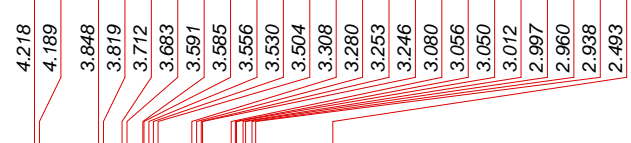

S70

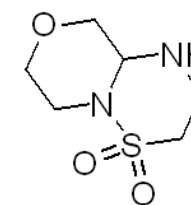

**9d** DMSO-d6

PPM

File name: lv-11

Operator: nmr

SF: 400.1300 MHz

NSC: 1

PW: 0.00 usec, RG: 25

SI: 32768

Date: 26-May-2022

Solvent: DMSO

SW: 8224 Hz

TE: 300 K

AQ: 1.99 sec, RD: 0.00 sec



70.01  
69.87  
66.2744.02  
43.41  
41.02  
39.95

S71

lv-11\_C13.fid

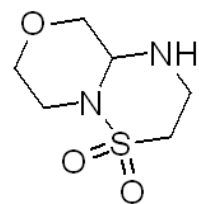**9d** DMSO-d6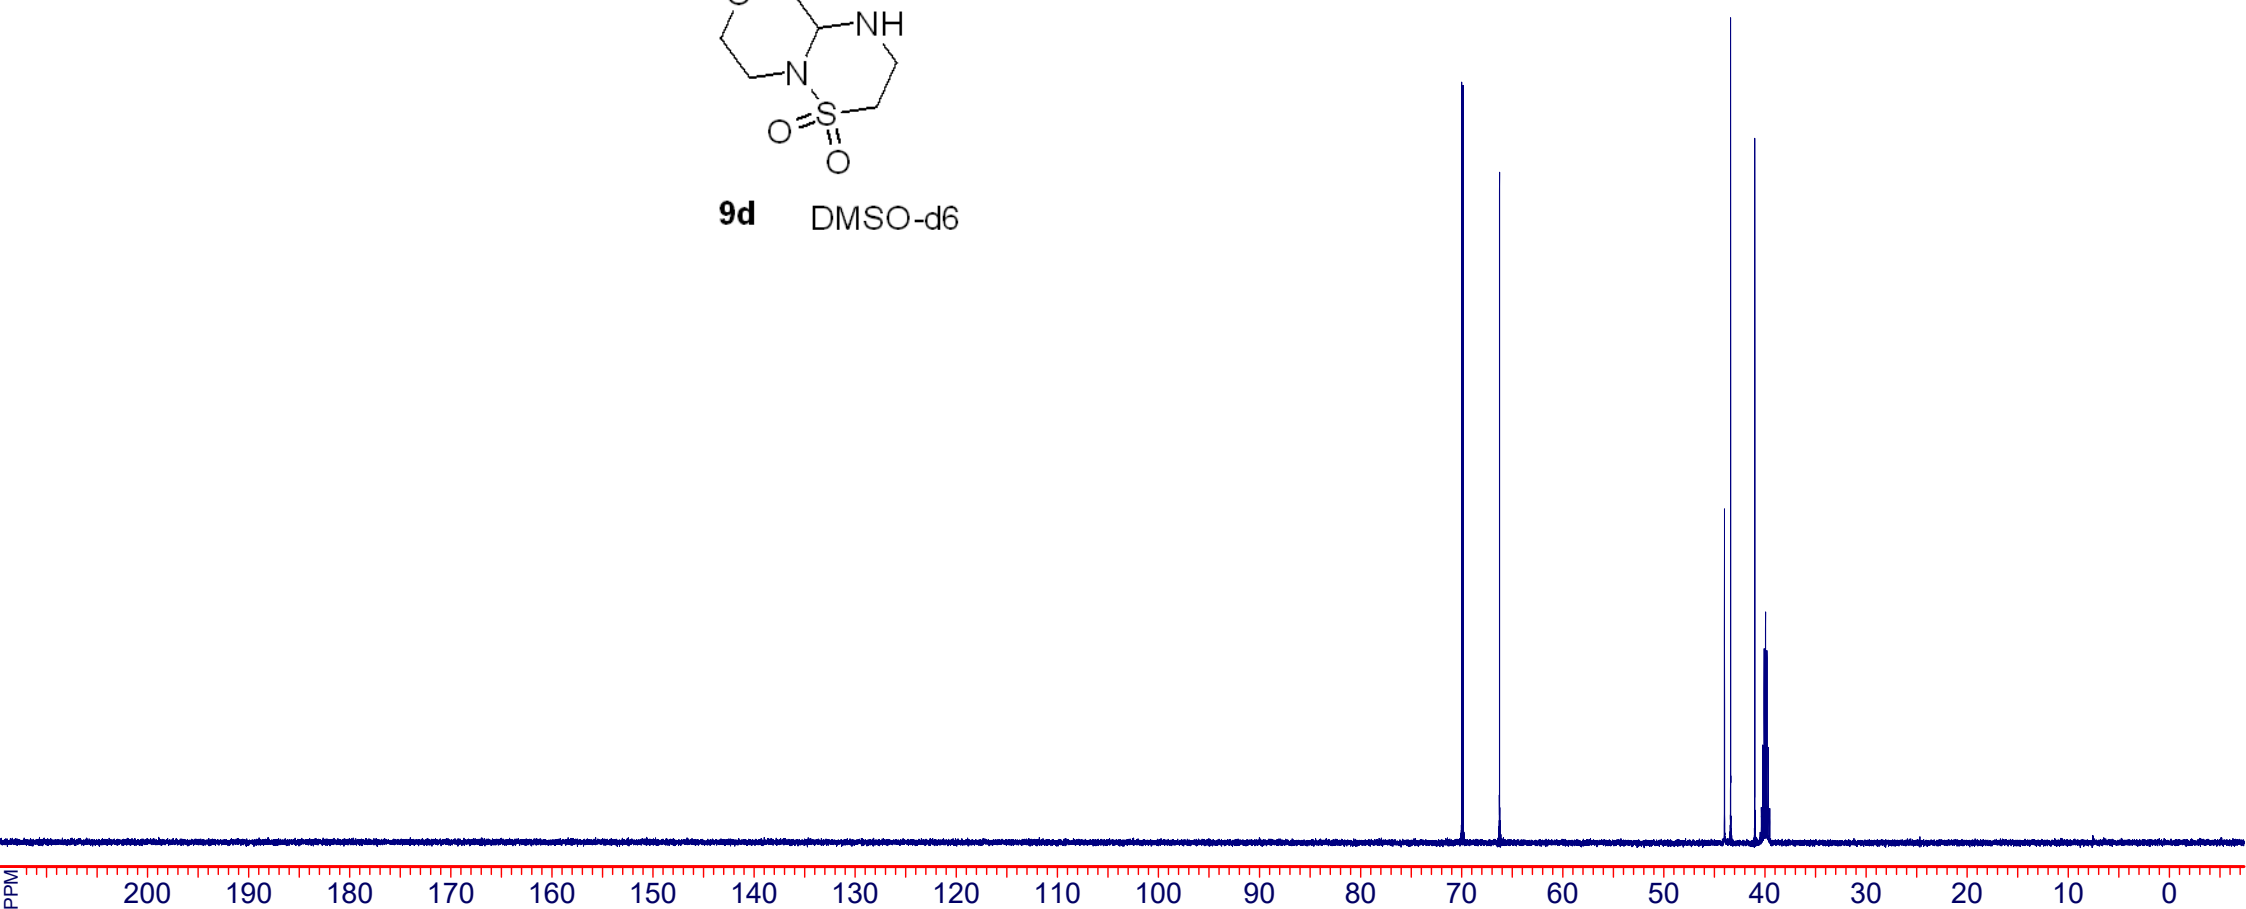

PPM 200 190 180 170 160 150 140 130 120 110 100 90 80 70 60 50 40 30 20 10 0

File name: lv-11\_C13.fid

Operator:

SF: 150.8304 MHz

NSC: 0

PW: 3.09 usec, RG: 60

SI: 65536

Date: 26-May-2022

Solvent: dms0

SW: 37879 Hz

TE: 298 K

AQ: 0.87 sec, RD: 0.00 sec

70.00  
69.87  
66.2744.03  
43.41  
41.02  
39.96

S72

lv-11\_C13APT.fid

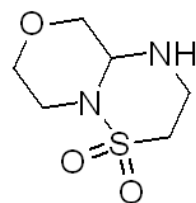**9d** DMSO-d6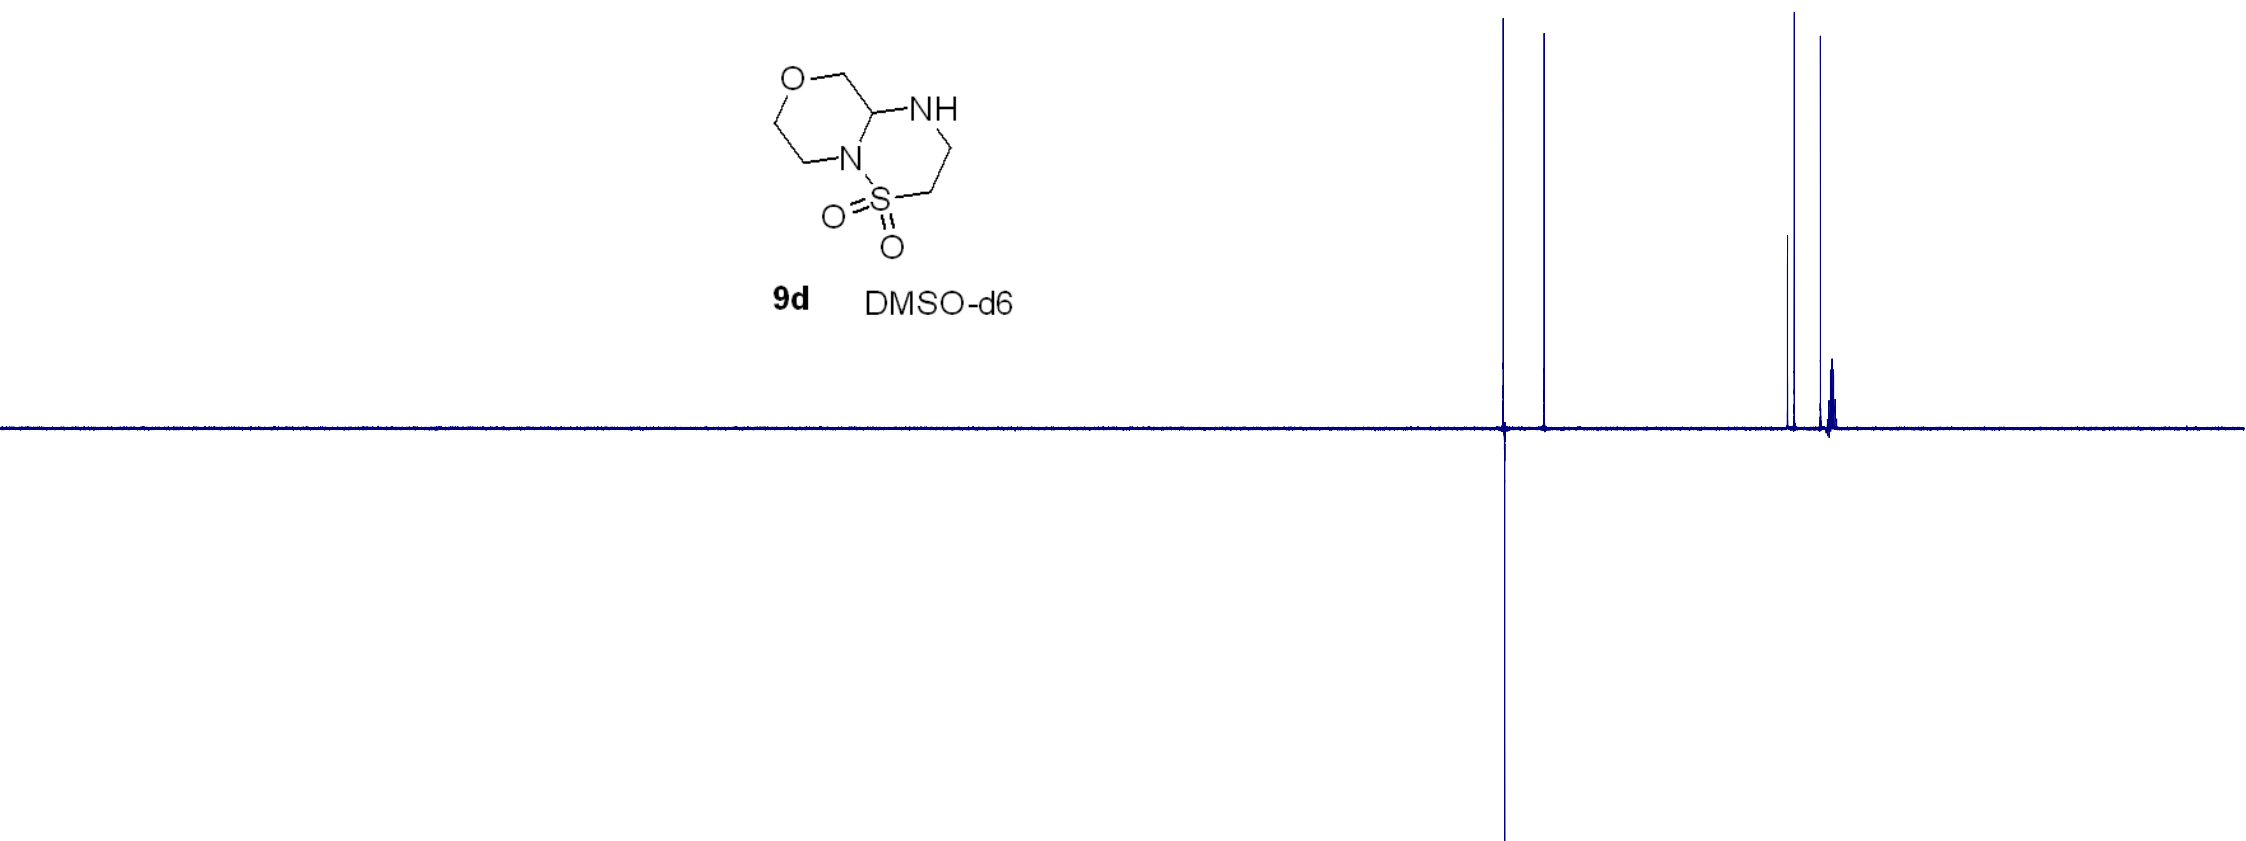

PPM 200 190 180 170 160 150 140 130 120 110 100 90 80 70 60 50 40 30 20 10

File name: lv-11\_C13APT.fid

Operator:

SF: 150.8333 MHz

NSC: 0

PW: 4.63 usec, RG: 60

SI: 131072

Date: 26-May-2022

Solvent: dms0

SW: 39063 Hz

TE: 298 K

AQ: 0.87 sec, RD: 0.00 sec

PPM

lv-8

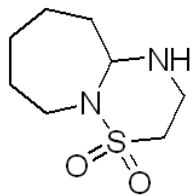**9f** DMSO-d<sub>6</sub>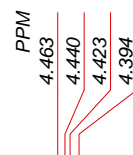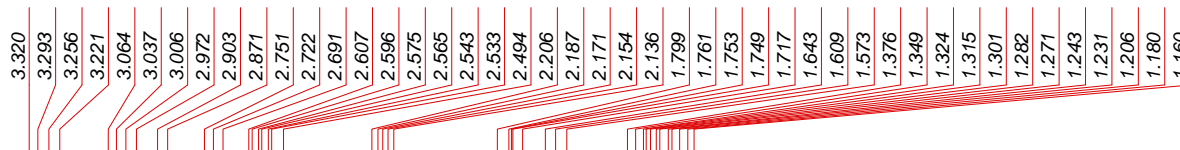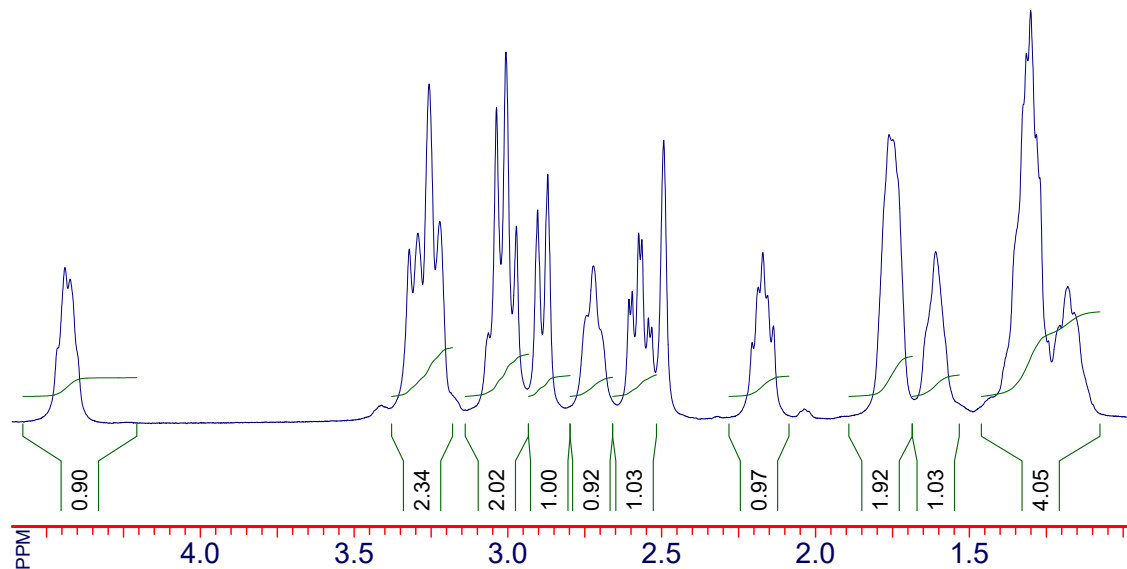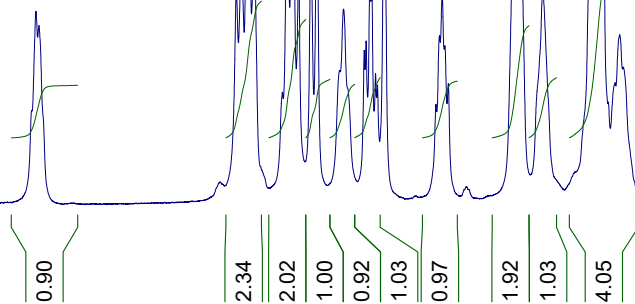4.463  
4.440  
4.423  
4.3943.320  
3.293  
3.256  
3.221  
3.064  
3.037  
3.006  
2.972  
2.903  
2.871  
2.751  
2.722  
2.691  
2.607  
2.596  
2.575  
2.565  
2.543  
2.533  
2.494  
2.206  
2.187  
2.171  
2.154  
2.136  
1.799  
1.761  
1.753  
1.749

PPM

11.0 10.0 9.0 8.0 7.0 6.0 5.0 4.0 3.0 2.0 1.0 0.0

File name: lv-8

Operator: nmr

SF: 400.1300 MHz

NSC: 1

PW: 0.00 usec, RG: 25

SI: 32768

Date: 26-May-2022

Solvent: DMSO

SW: 8224 Hz

TE: 300 K

AQ: 1.99 sec, RD: 0.00 sec

Parameter file, TOPSPINVersion 2.1

lv8\_C13

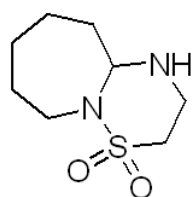**9f** DMSO-d6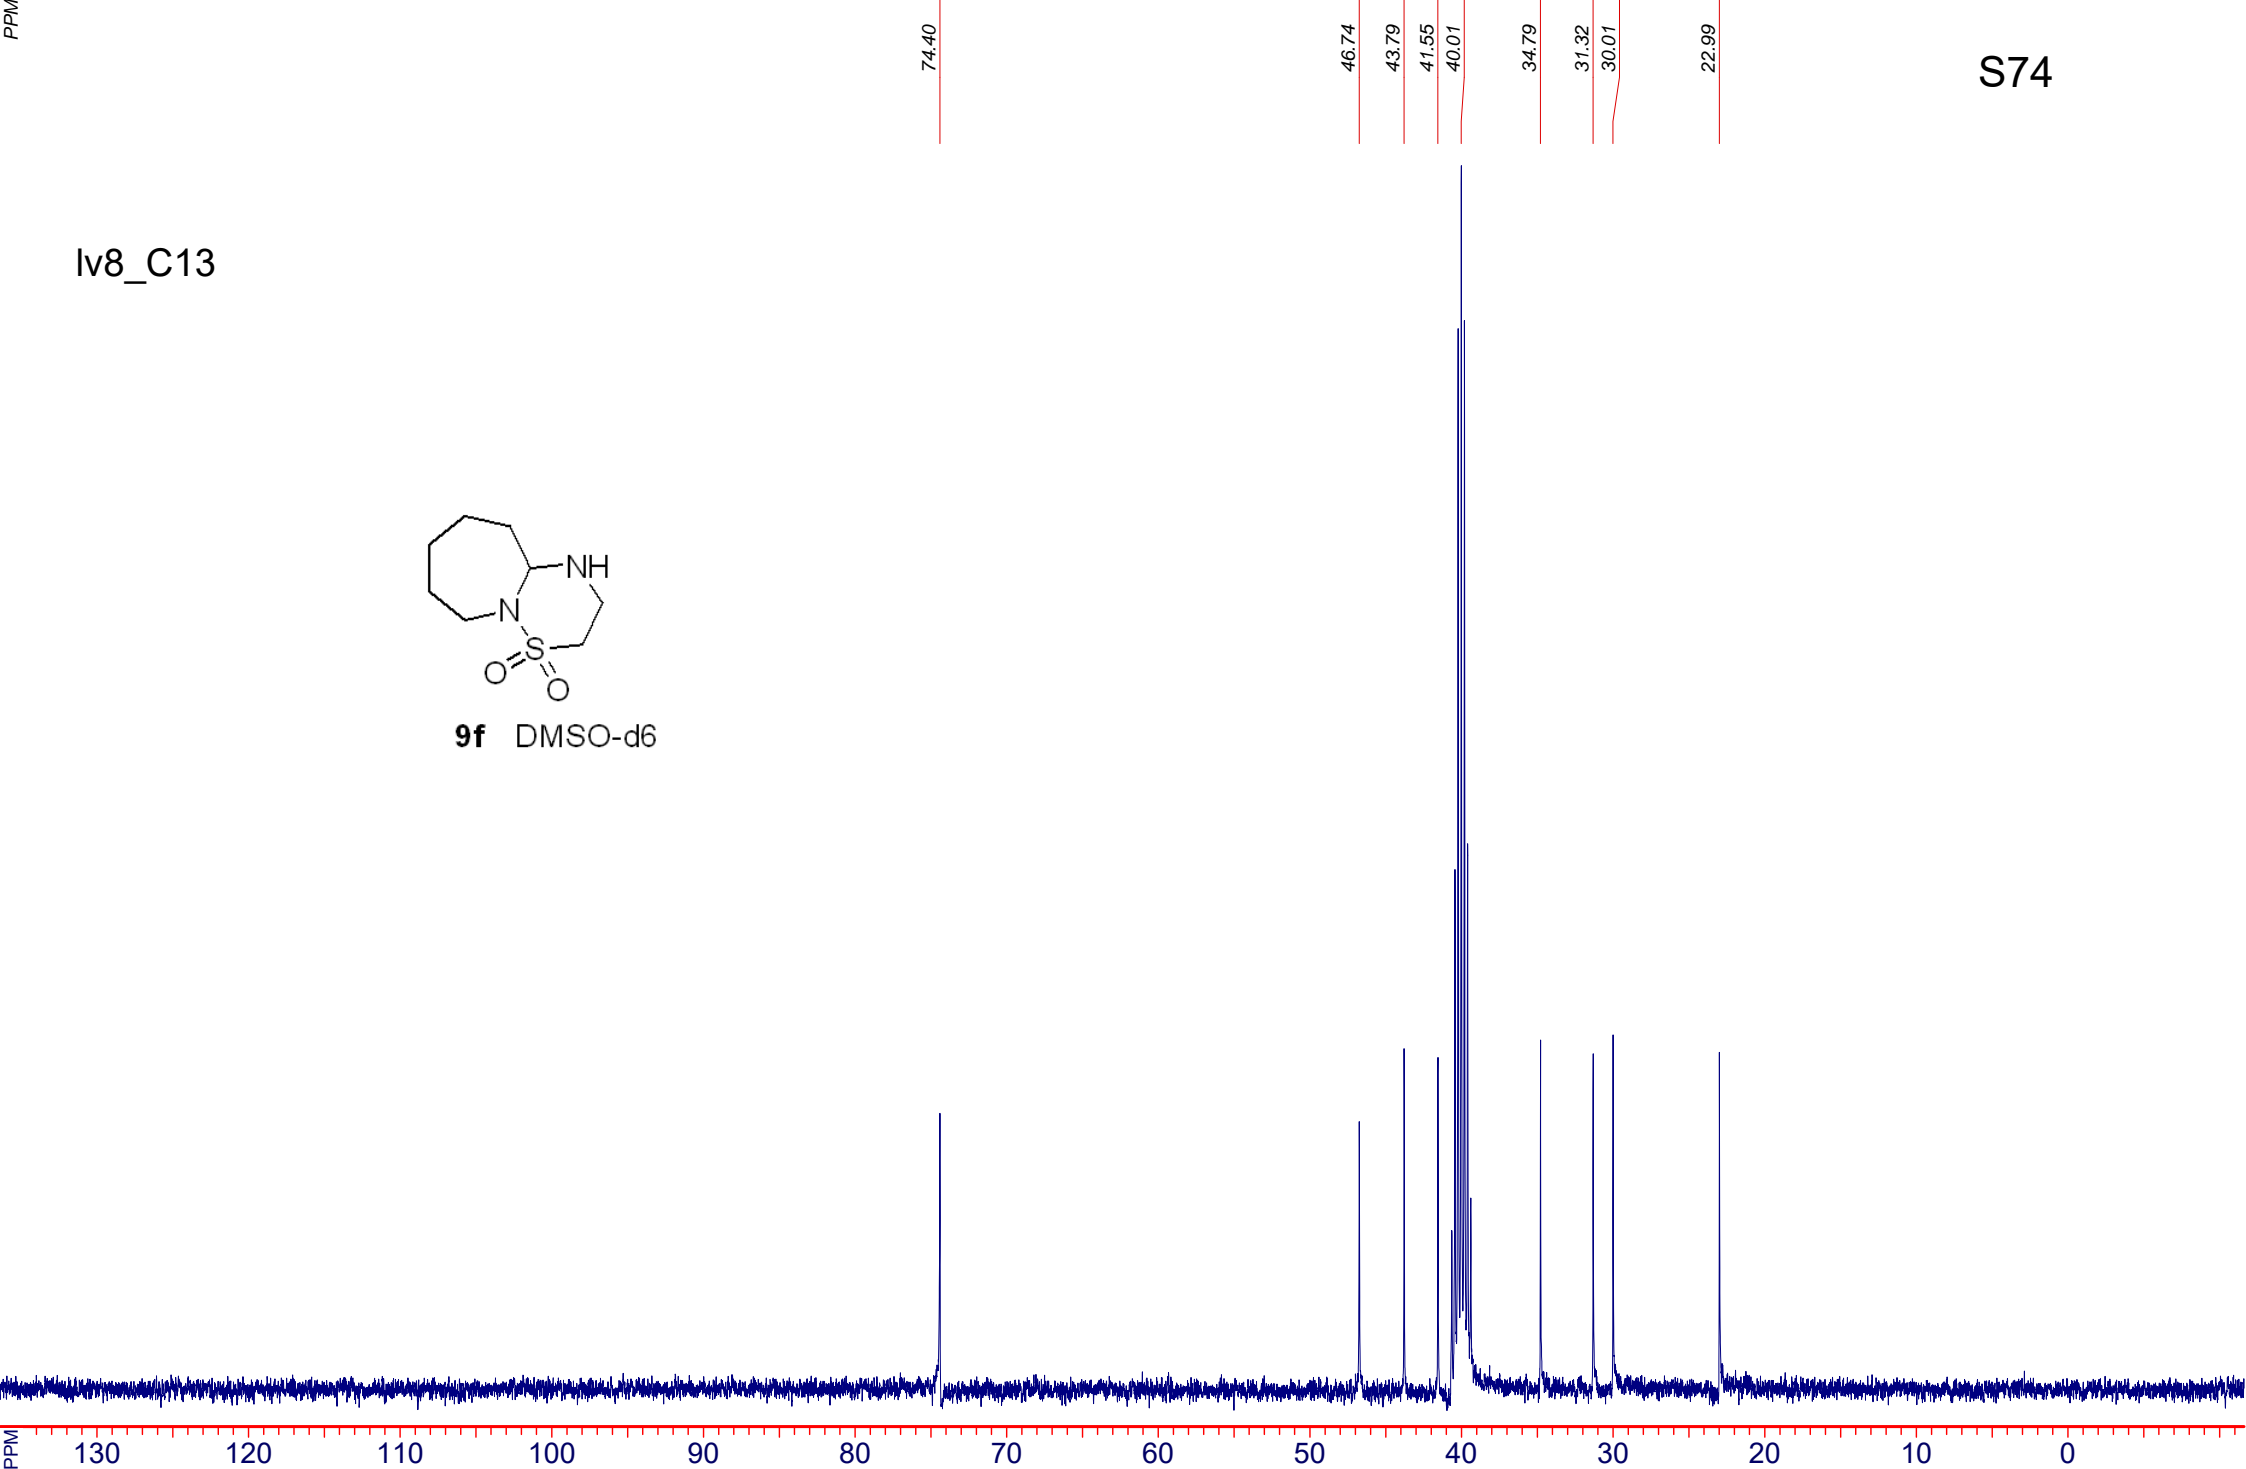

74.40

46.74

43.79

41.55

40.01

34.79

31.32

30.01

22.99

File name: lv8\_C13

Operator: nmr

SF: 100.6128 MHz

NSC: 367

PW: 0.00 usec, RG: 2050

SI: 32768

Date: 30-May-2022

Solvent: DMSO

SW: 26042 Hz

TE: 300 K

AQ: 0.98 sec, RD: 0.00 sec

PPM

lv-8\_C13APT

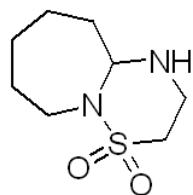**9f** DMSO-d6

74.40

46.74

43.78

41.55

40.01

34.79

31.32

30.00

22.99

S75

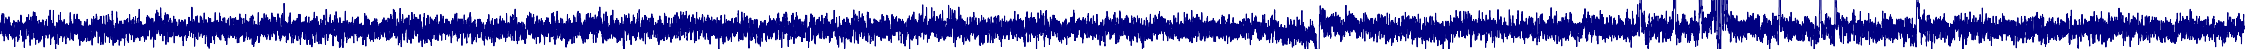

PPM

180 170 160 150 140 130 120 110 100 90 80 70 60 50 40 30 20 10 0

File name: lv-8\_C13APT

Operator: nmr

SF: 100.6128 MHz

NSC: 10240

PW: 0.00 usec, RG: 2050

SI: 65536

Date: 31-May-2022

Solvent: DMSO

SW: 24038 Hz

TE: 300 K

AQ: 1.36 sec, RD: 0.00 sec

LV-16

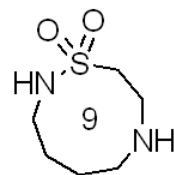**11a** DMSO-d6

6.737

3.333  
3.288  
3.197  
3.184  
3.169  
3.127  
2.943  
2.929  
2.915  
2.681  
2.668  
2.494  
1.620  
1.584  
1.544

S76

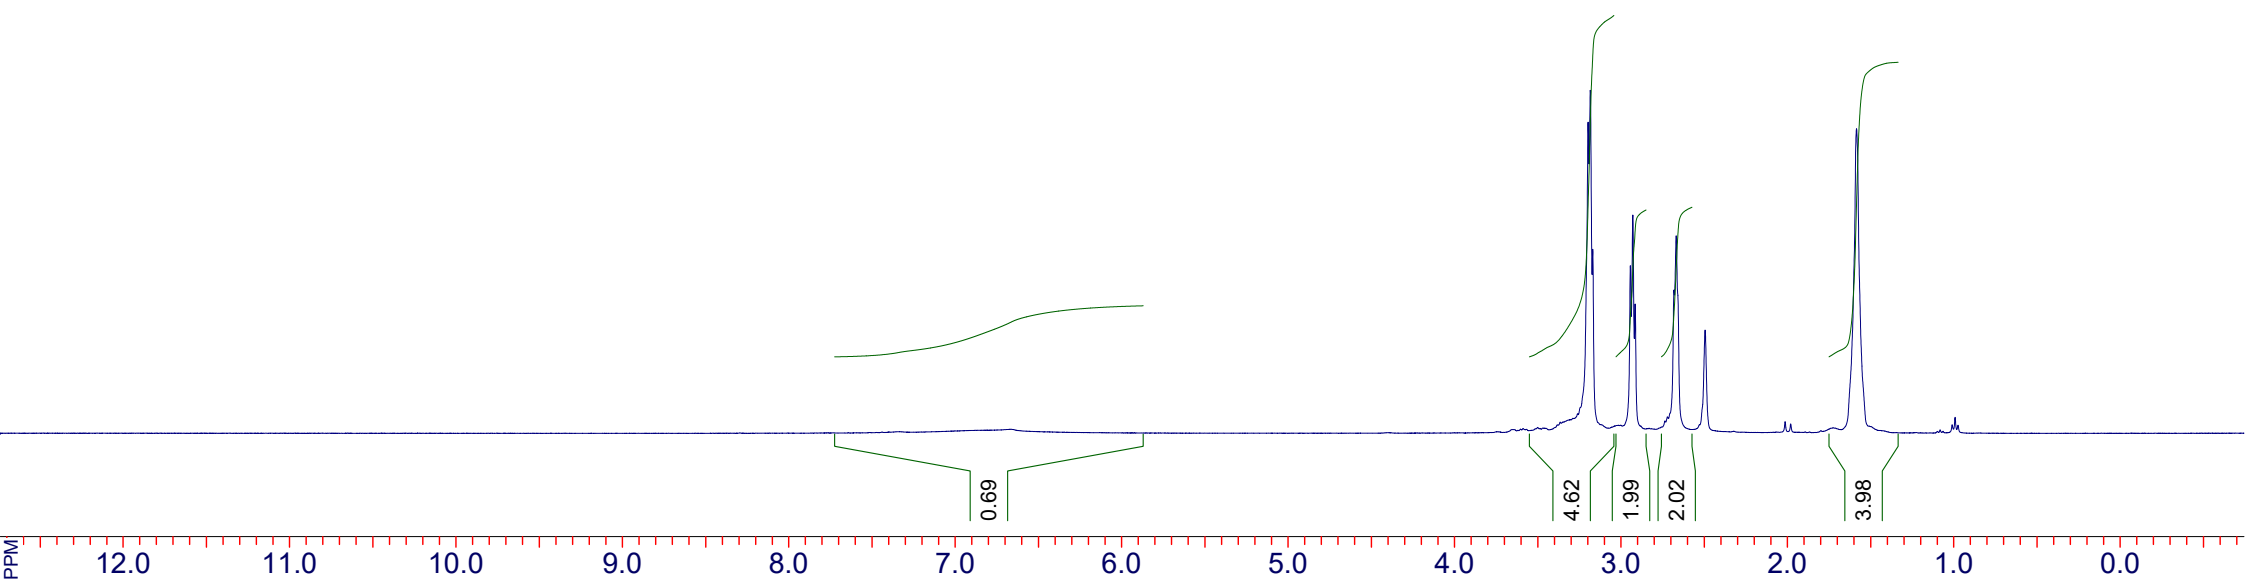

File name: LV-16

Operator: nmr

SF: 400.1300 MHz

NSC: 1

PW: 0.00 usec, RG: 25

SI: 32768

Date: 03-Jun-2022

Solvent: DMSO

SW: 8224 Hz

TE: 300 K

AQ: 1.99 sec, RD: 0.00 sec

Parameter file, TOPSPINVersion 2.1

PPM

52.95  
49.48  
45.03  
43.40  
40.01  
28.71  
28.55

S77

lv-16\_C13

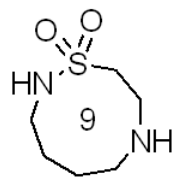**11a** DMSO-d6PPM  
190 180 170 160 150 140 130 120 110 100 90 80 70 60 50 40 30 20 10 0

|                      |               |                  |           |                            |                                    |
|----------------------|---------------|------------------|-----------|----------------------------|------------------------------------|
| File name: lv-16_C13 | Operator: nmr | SF: 100.6128 MHz | NSC: 122  | PW: 0.00 usec, RG: 2050    | SI: 32768                          |
| Date: 03-Jun-2022    | Solvent: DMSO | SW: 26042 Hz     | TE: 300 K | AQ: 0.98 sec, RD: 0.00 sec | Parameter file, TOPSPINVersion 2.1 |

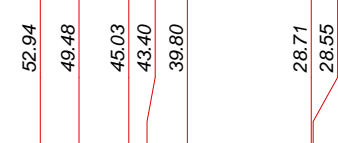

S78

lv-16\_C13APT

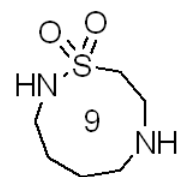**11a** DMSO-d6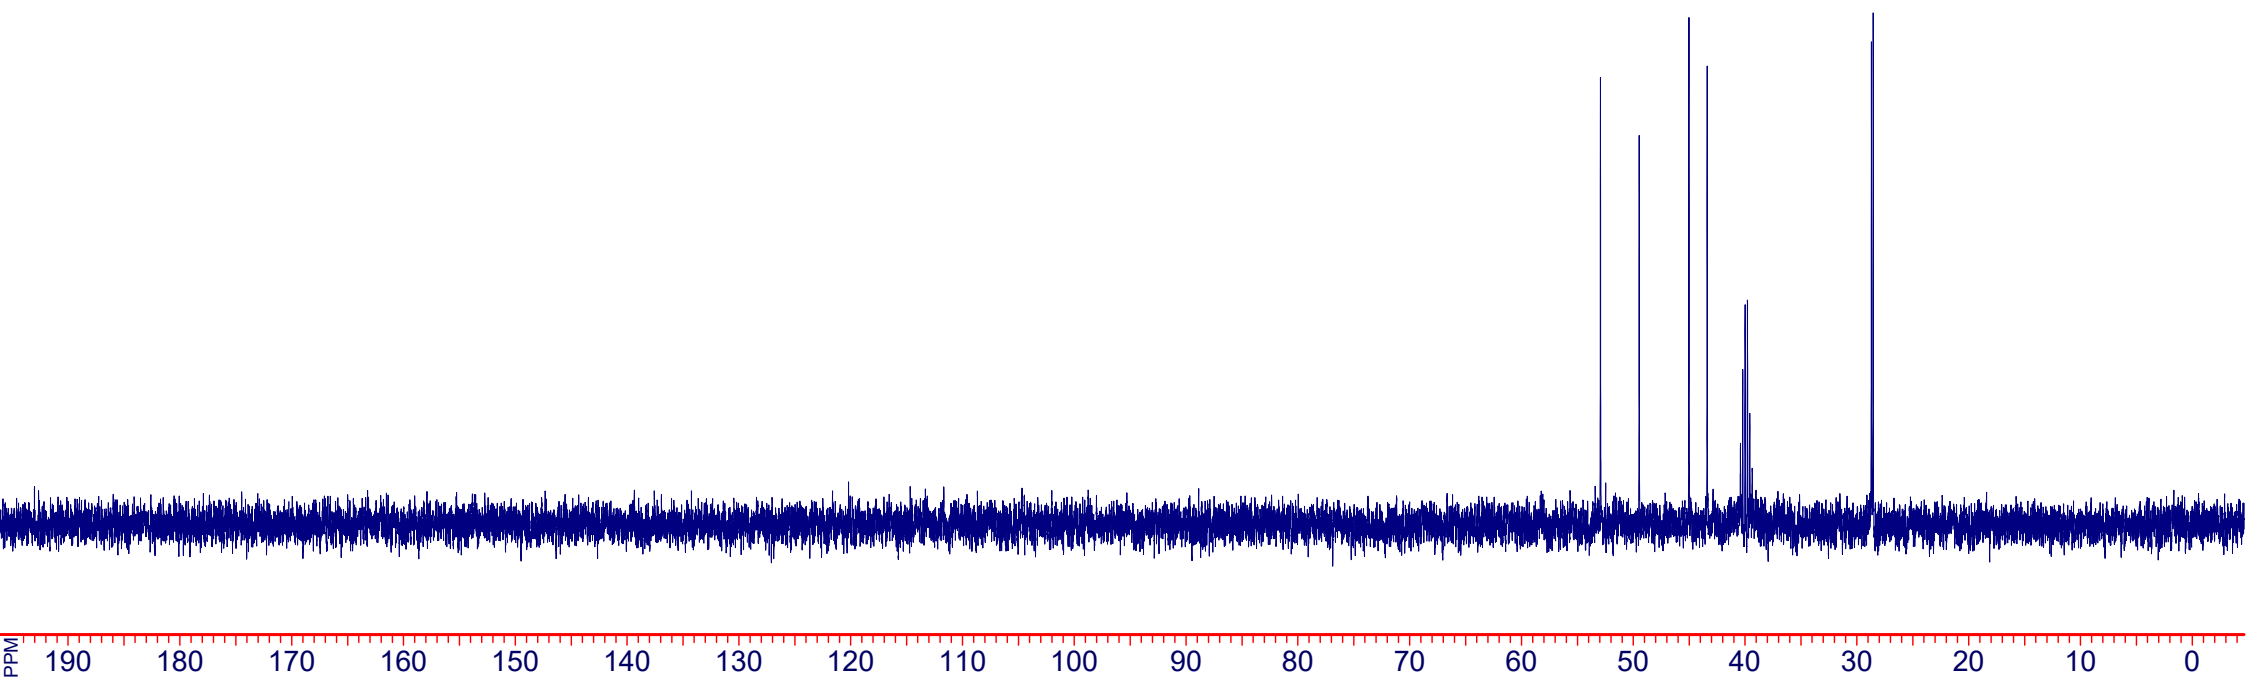

PPM 190 180 170 160 150 140 130 120 110 100 90 80 70 60 50 40 30 20 10 0

File name: lv-16\_C13APT

Operator: nmr

SF: 100.6128 MHz

NSC: 357

PW: 0.00 usec, RG: 2050

SI: 65536

Date: 03-Jun-2022

Solvent: DMSO

SW: 24038 Hz

TE: 300 K

AQ: 1.36 sec, RD: 0.00 sec

Parameter file, TOPSPINVersion 2.1



PPM

lv633-1

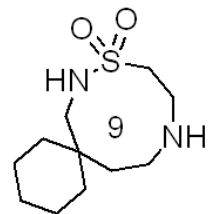**11b** DMSO-d6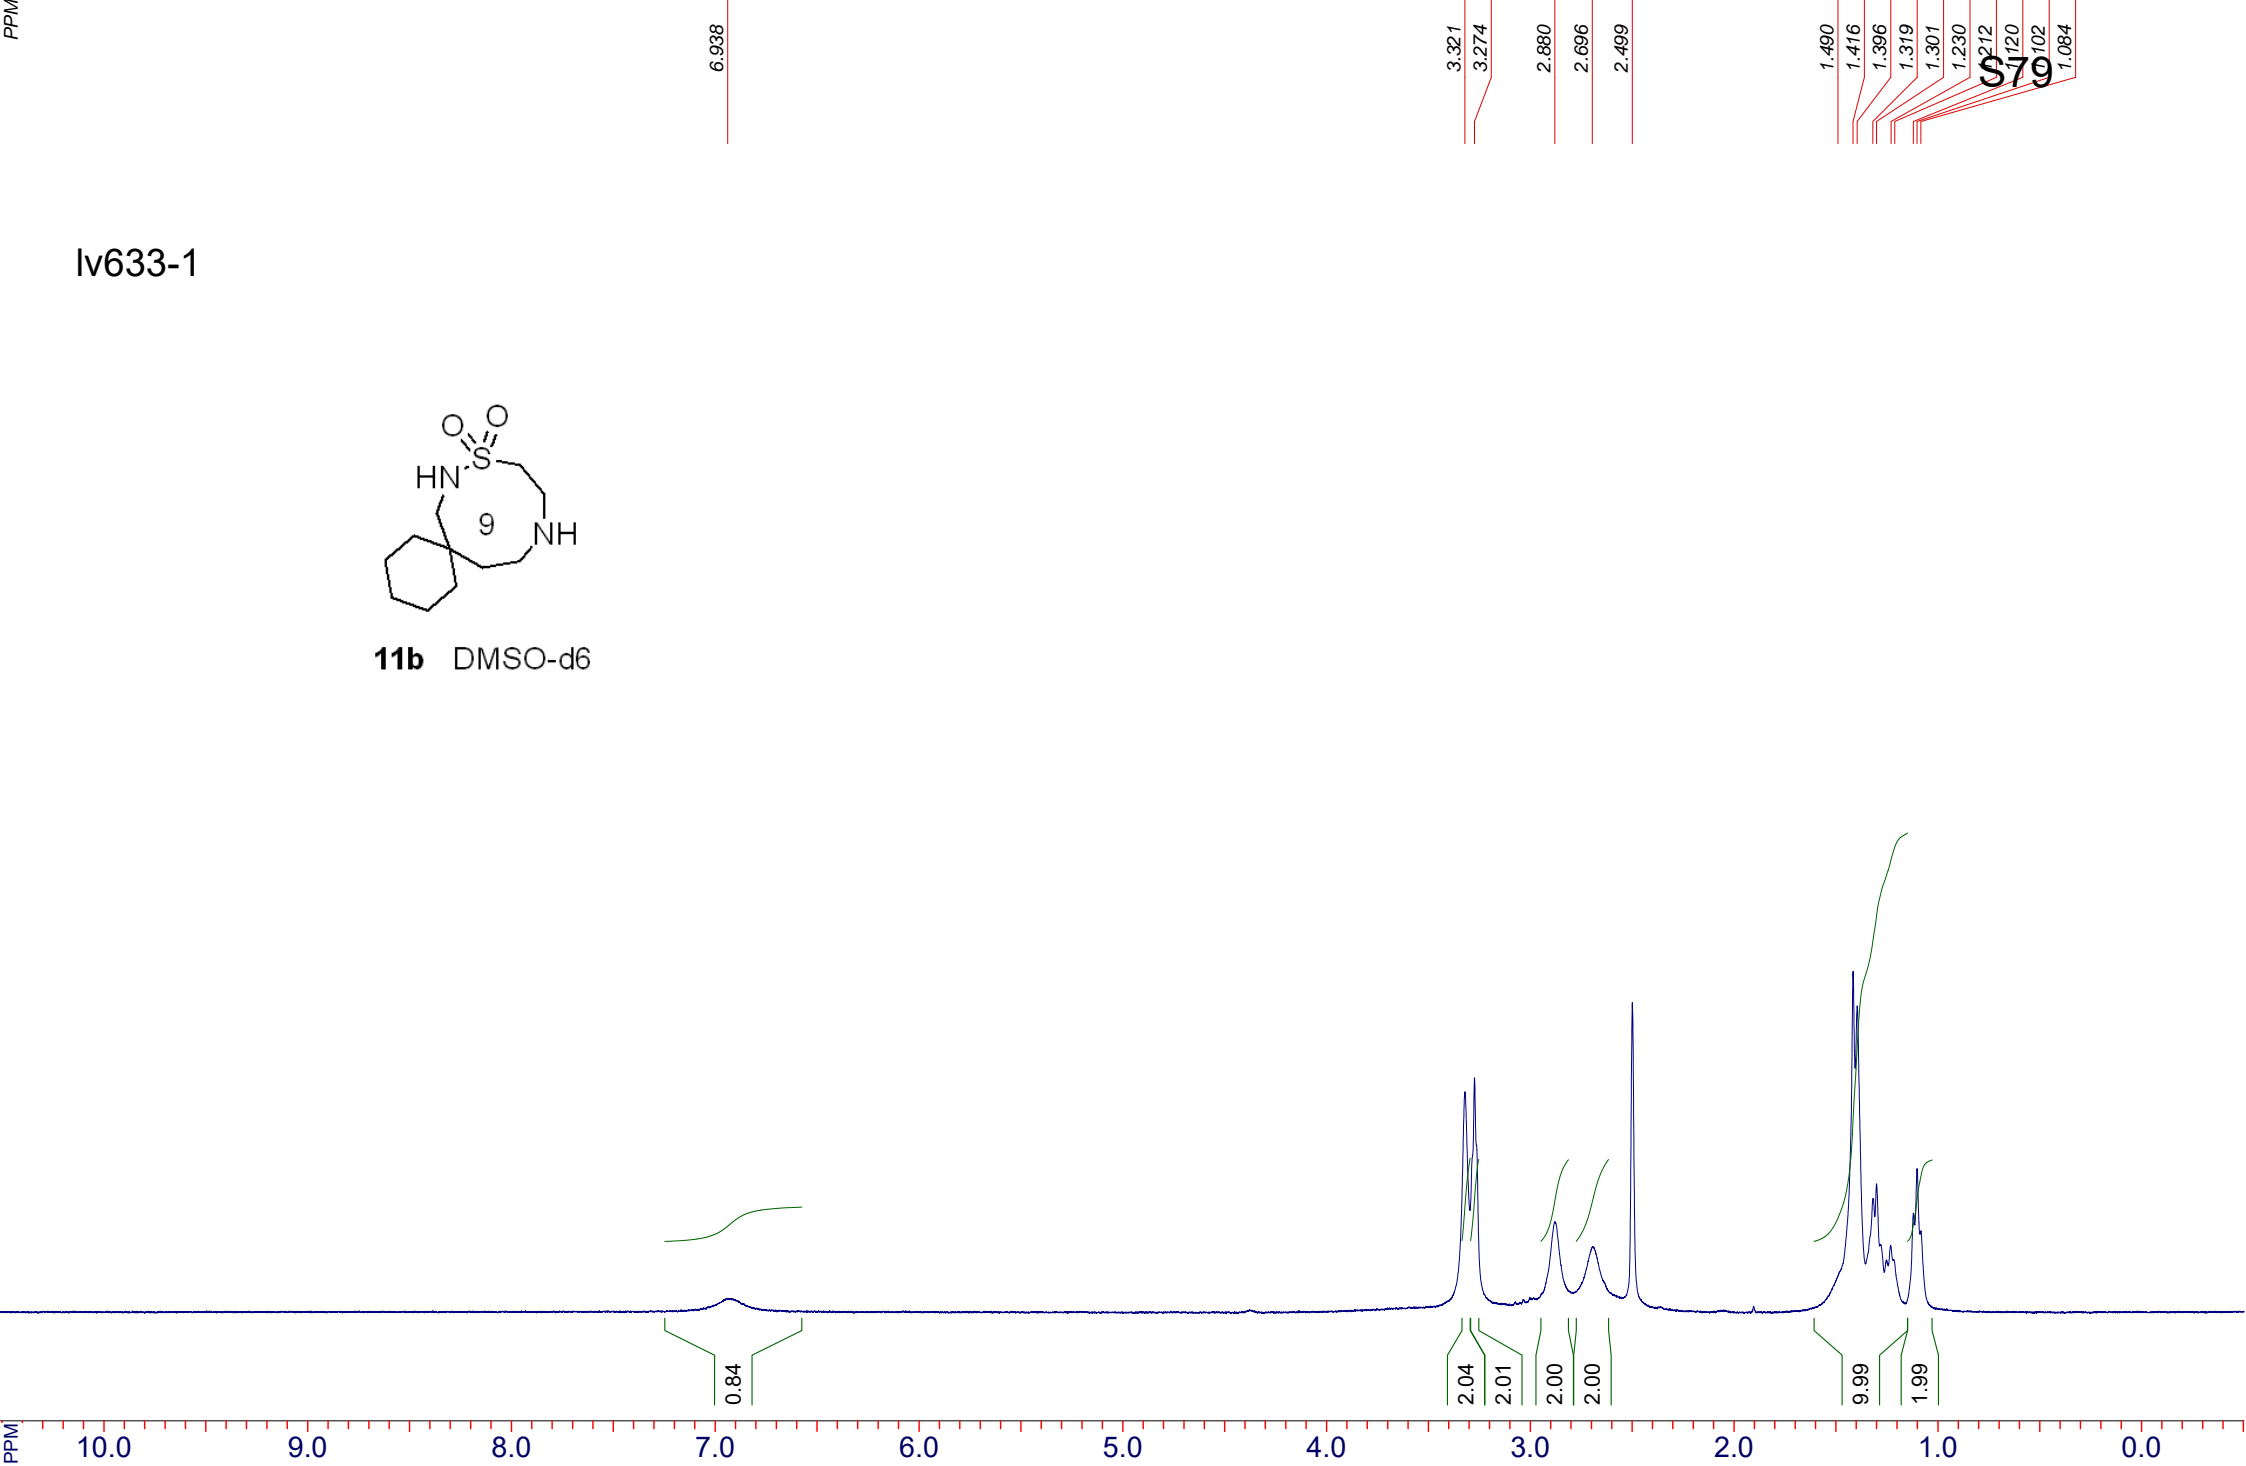

PPM

File name: lv633-1

Operator: root

SF: 499.6730 MHz

NSC: 1

PW: 0.00 usec, RG: 32

SI: 32768

Date: 10-Nov-2022

Solvent: DMSO

SW: 8993 Hz

TE: 683 K

AQ: 1.82 sec, RD: 0.00 sec

PPM

lv-633\_C13

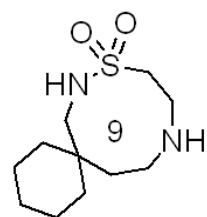**11b** DMSO-d6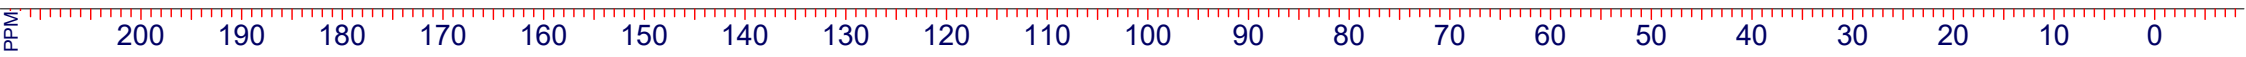

54.59

51.34

44.90

44.60

39.52

36.31

33.93

32.97

25.86

21.01

S80

File name: lv-633\_C13

Operator: root

SF: 125.6429 MHz

NSC: 500

PW: 0.00 usec, RG: 51200

SI: 131072

Date: 12-Nov-2022

Solvent: DMSO

SW: 32680 Hz

TE: 683 K

AQ: 0.78 sec, RD: 0.00 sec

54.55  
51.33  
44.86  
44.57  
39.53  
36.30  
32.98  
25.84  
21.00

S81

lv-633\_C13APT

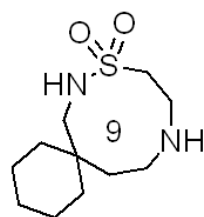**11b** DMSO-d6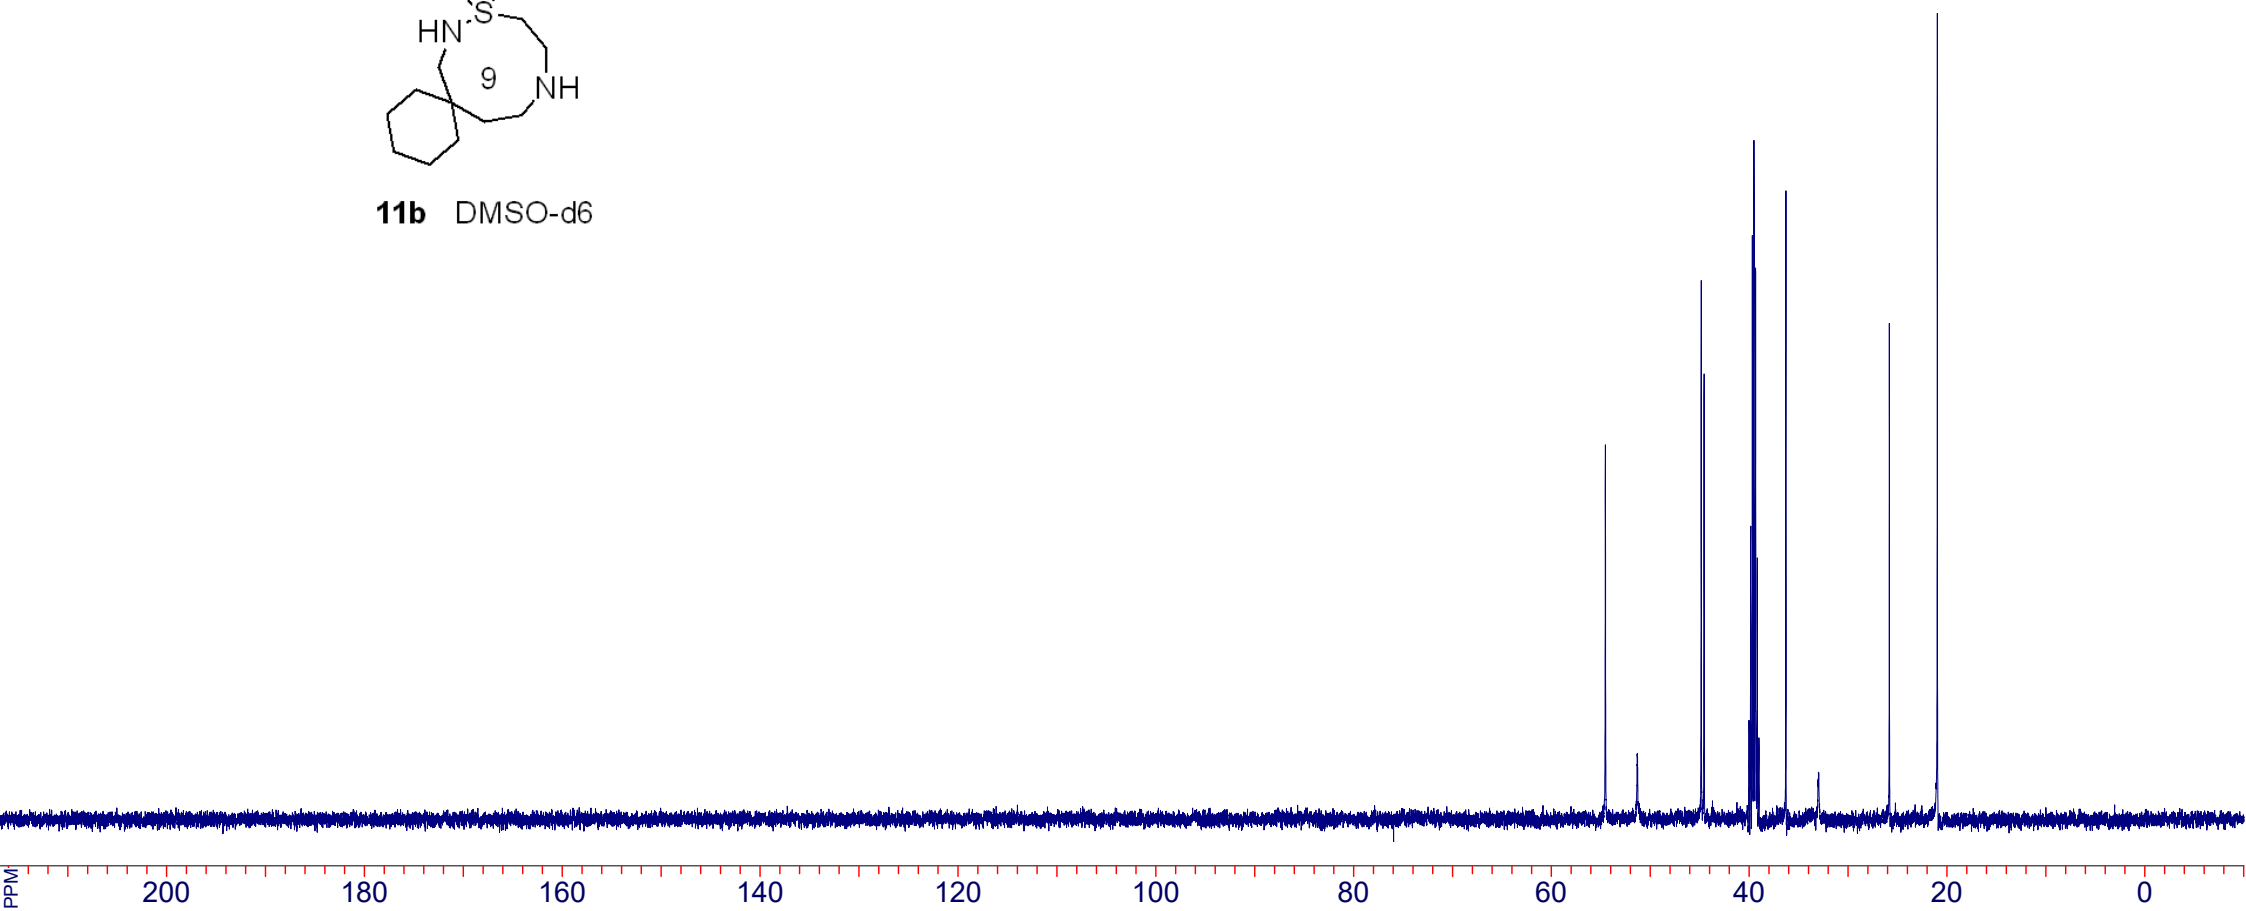

PPM 200 180 160 140 120 100 80 60 40 20 0

File name: lv-633\_C13APT

Operator: root

SF: 125.6429 MHz

NSC: 600

PW: 0.00 usec, RG: 51200

SI: 65536

Date: 12-Nov-2022

Solvent: DMSO

SW: 32680 Hz

TE: 683 K

AQ: 1.00 sec, RD: 0.00 sec

PPM

lv-13

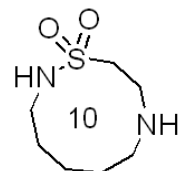**11c** DMSO-d<sub>6</sub>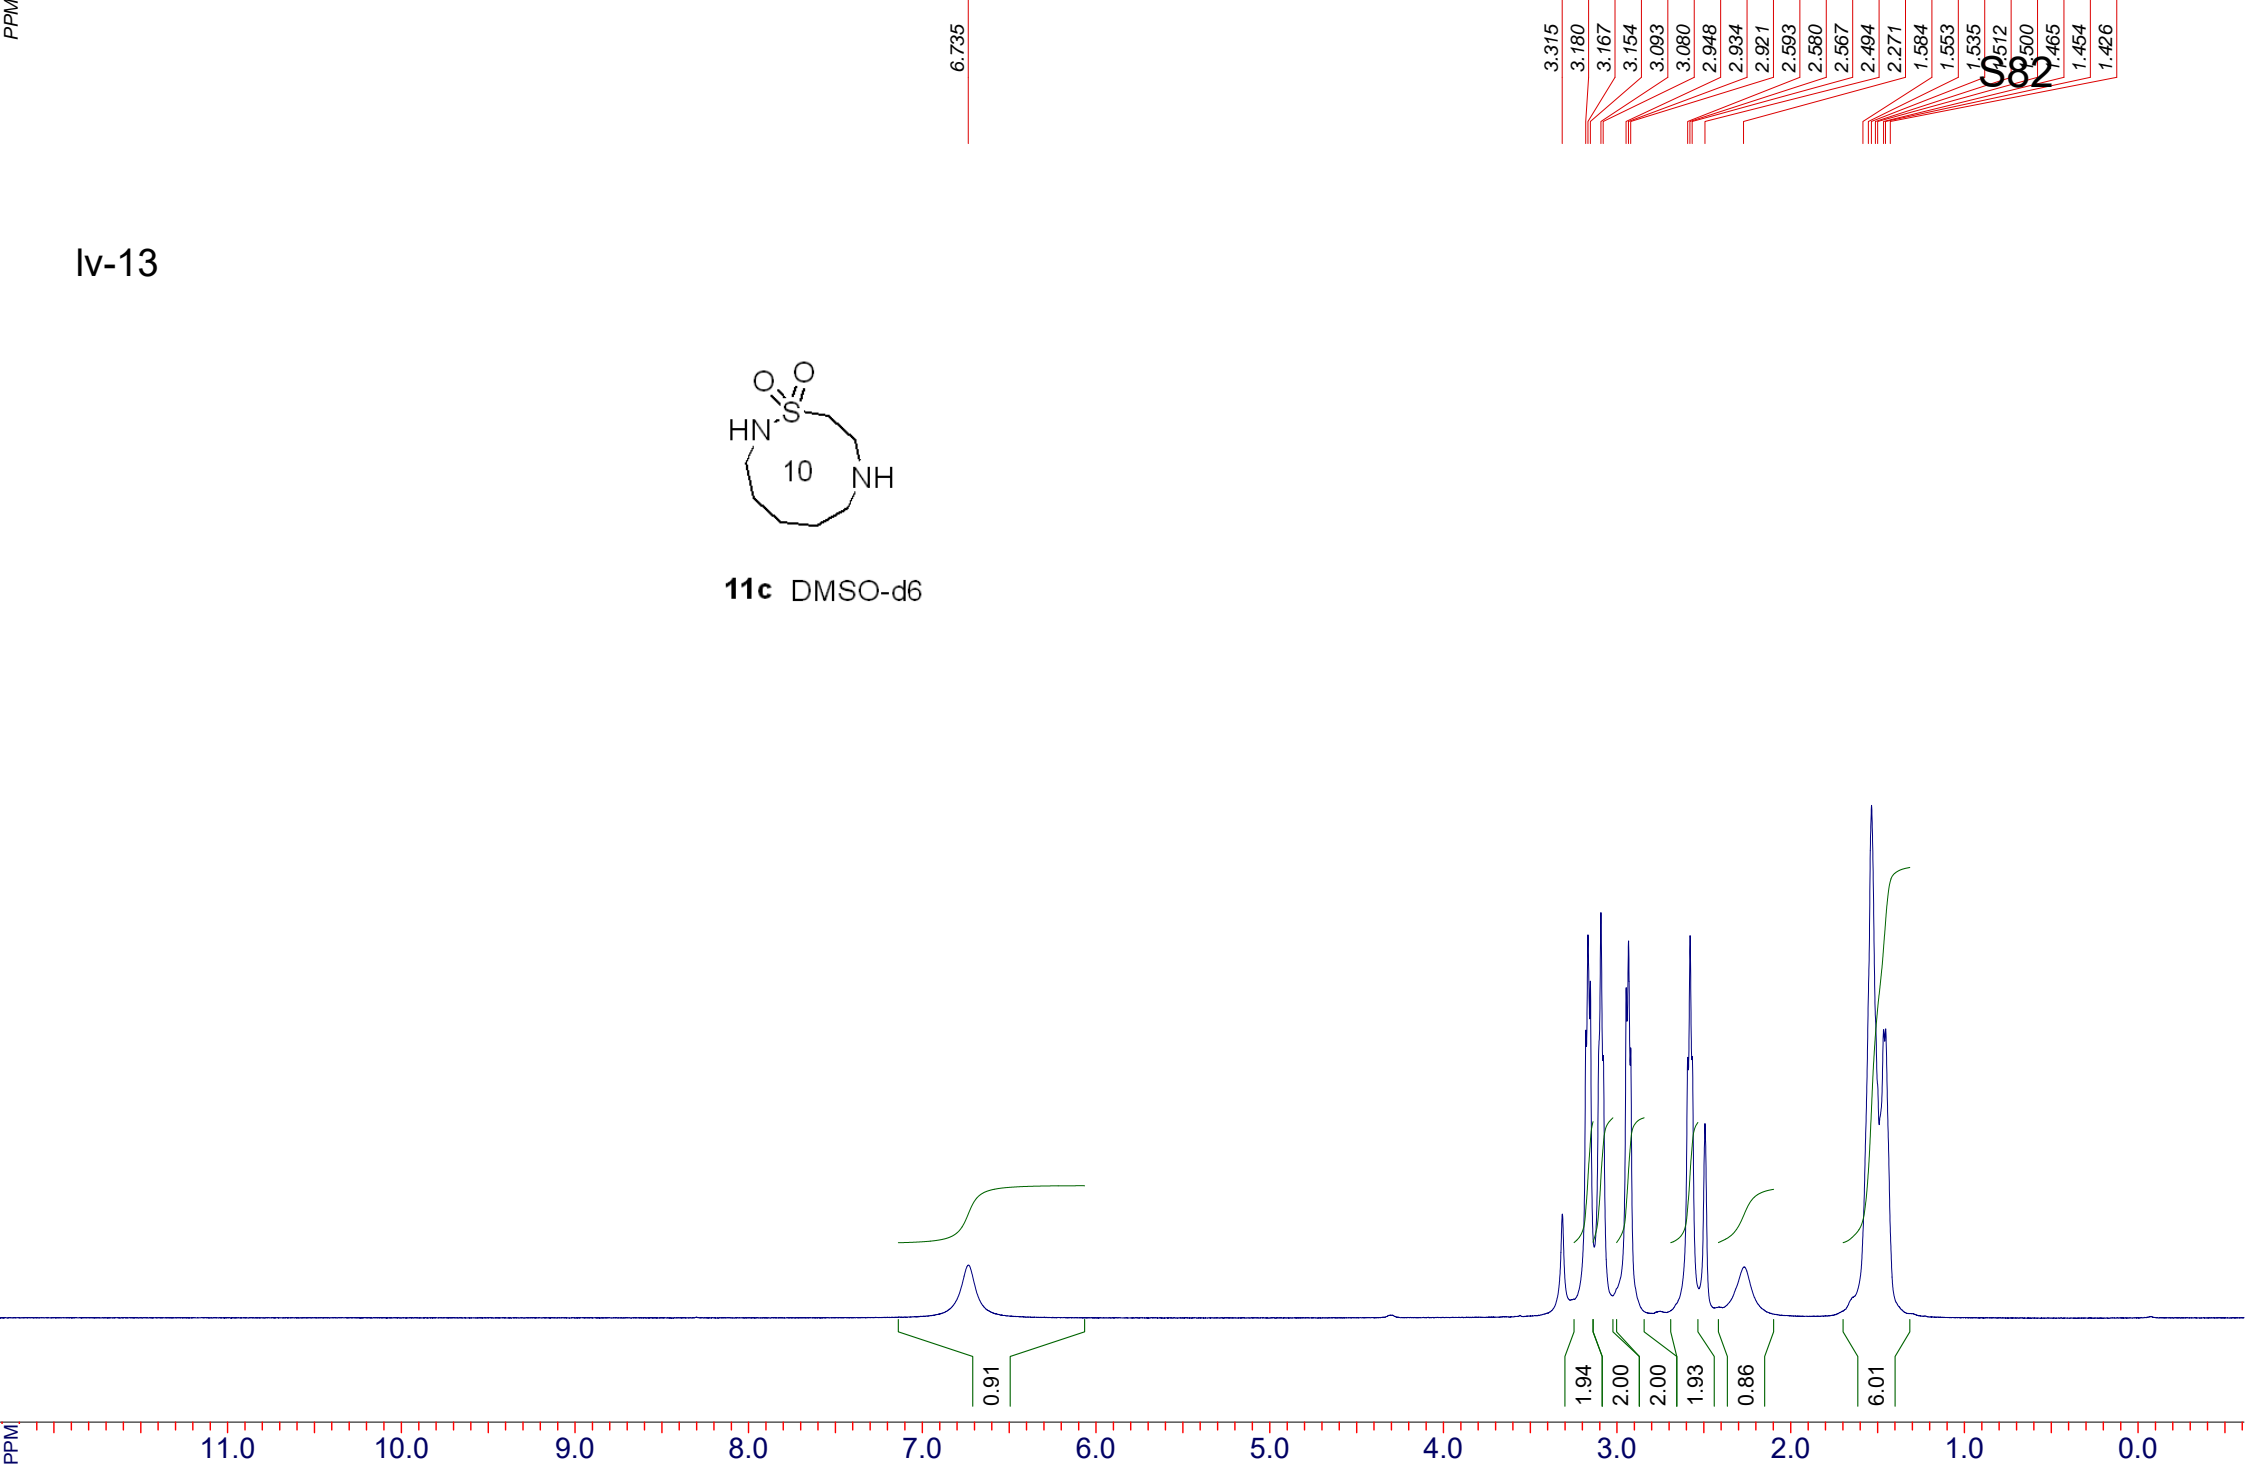

PPM

11.0

10.0

9.0

8.0

7.0

6.0

5.0

4.0

3.0

2.0

1.0

0.0

File name: lv-13

Operator: nmr

SF: 400.1300 MHz

NSC: 1

PW: 0.00 usec, RG: 25

SI: 32768

Date: 26-May-2022

Solvent: DMSO

SW: 8224 Hz

TE: 300 K

AQ: 1.99 sec, RD: 0.00 sec

Parameter file, TOPSPINVersion 2.1

PPM

lv-13\_C13

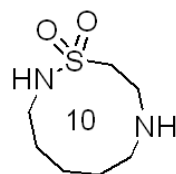**11c** DMSO-d6

47.91

44.66

43.27

41.75

39.56

26.86

25.63

20.38

S83

PPM

180 170 160 150 140 130 120 110 100 90 80 70 60 50 40 30 20 10 0

File name: lv-13\_C13

Operator: root

SF: 125.6681 MHz

NSC: 237

PW: 0.00 usec, RG: 51200

SI: 131072

Date: 26-May-2022

Solvent: DMSO

SW: 32680 Hz

TE: 683 K

AQ: 0.78 sec, RD: 0.00 sec

lv-13\_C13APT

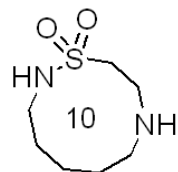**11c** DMSO-d647.93  
44.63  
43.22  
41.70  
39.5326.81  
25.59  
20.35

S84

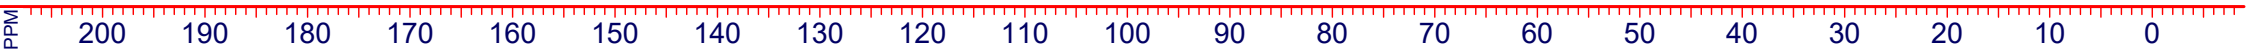

File name: lv-13\_C13APT

Operator: root

SF: 125.6681 MHz

NSC: 237

PW: 0.00 usec, RG: 51200

SI: 65536

Date: 26-May-2022

Solvent: DMSO

SW: 32680 Hz

TE: 683 K

AQ: 1.57 sec, RD: 0.00 sec

lv-693

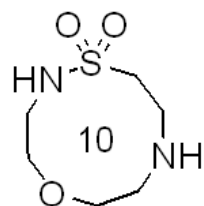**11d** DMSO-d6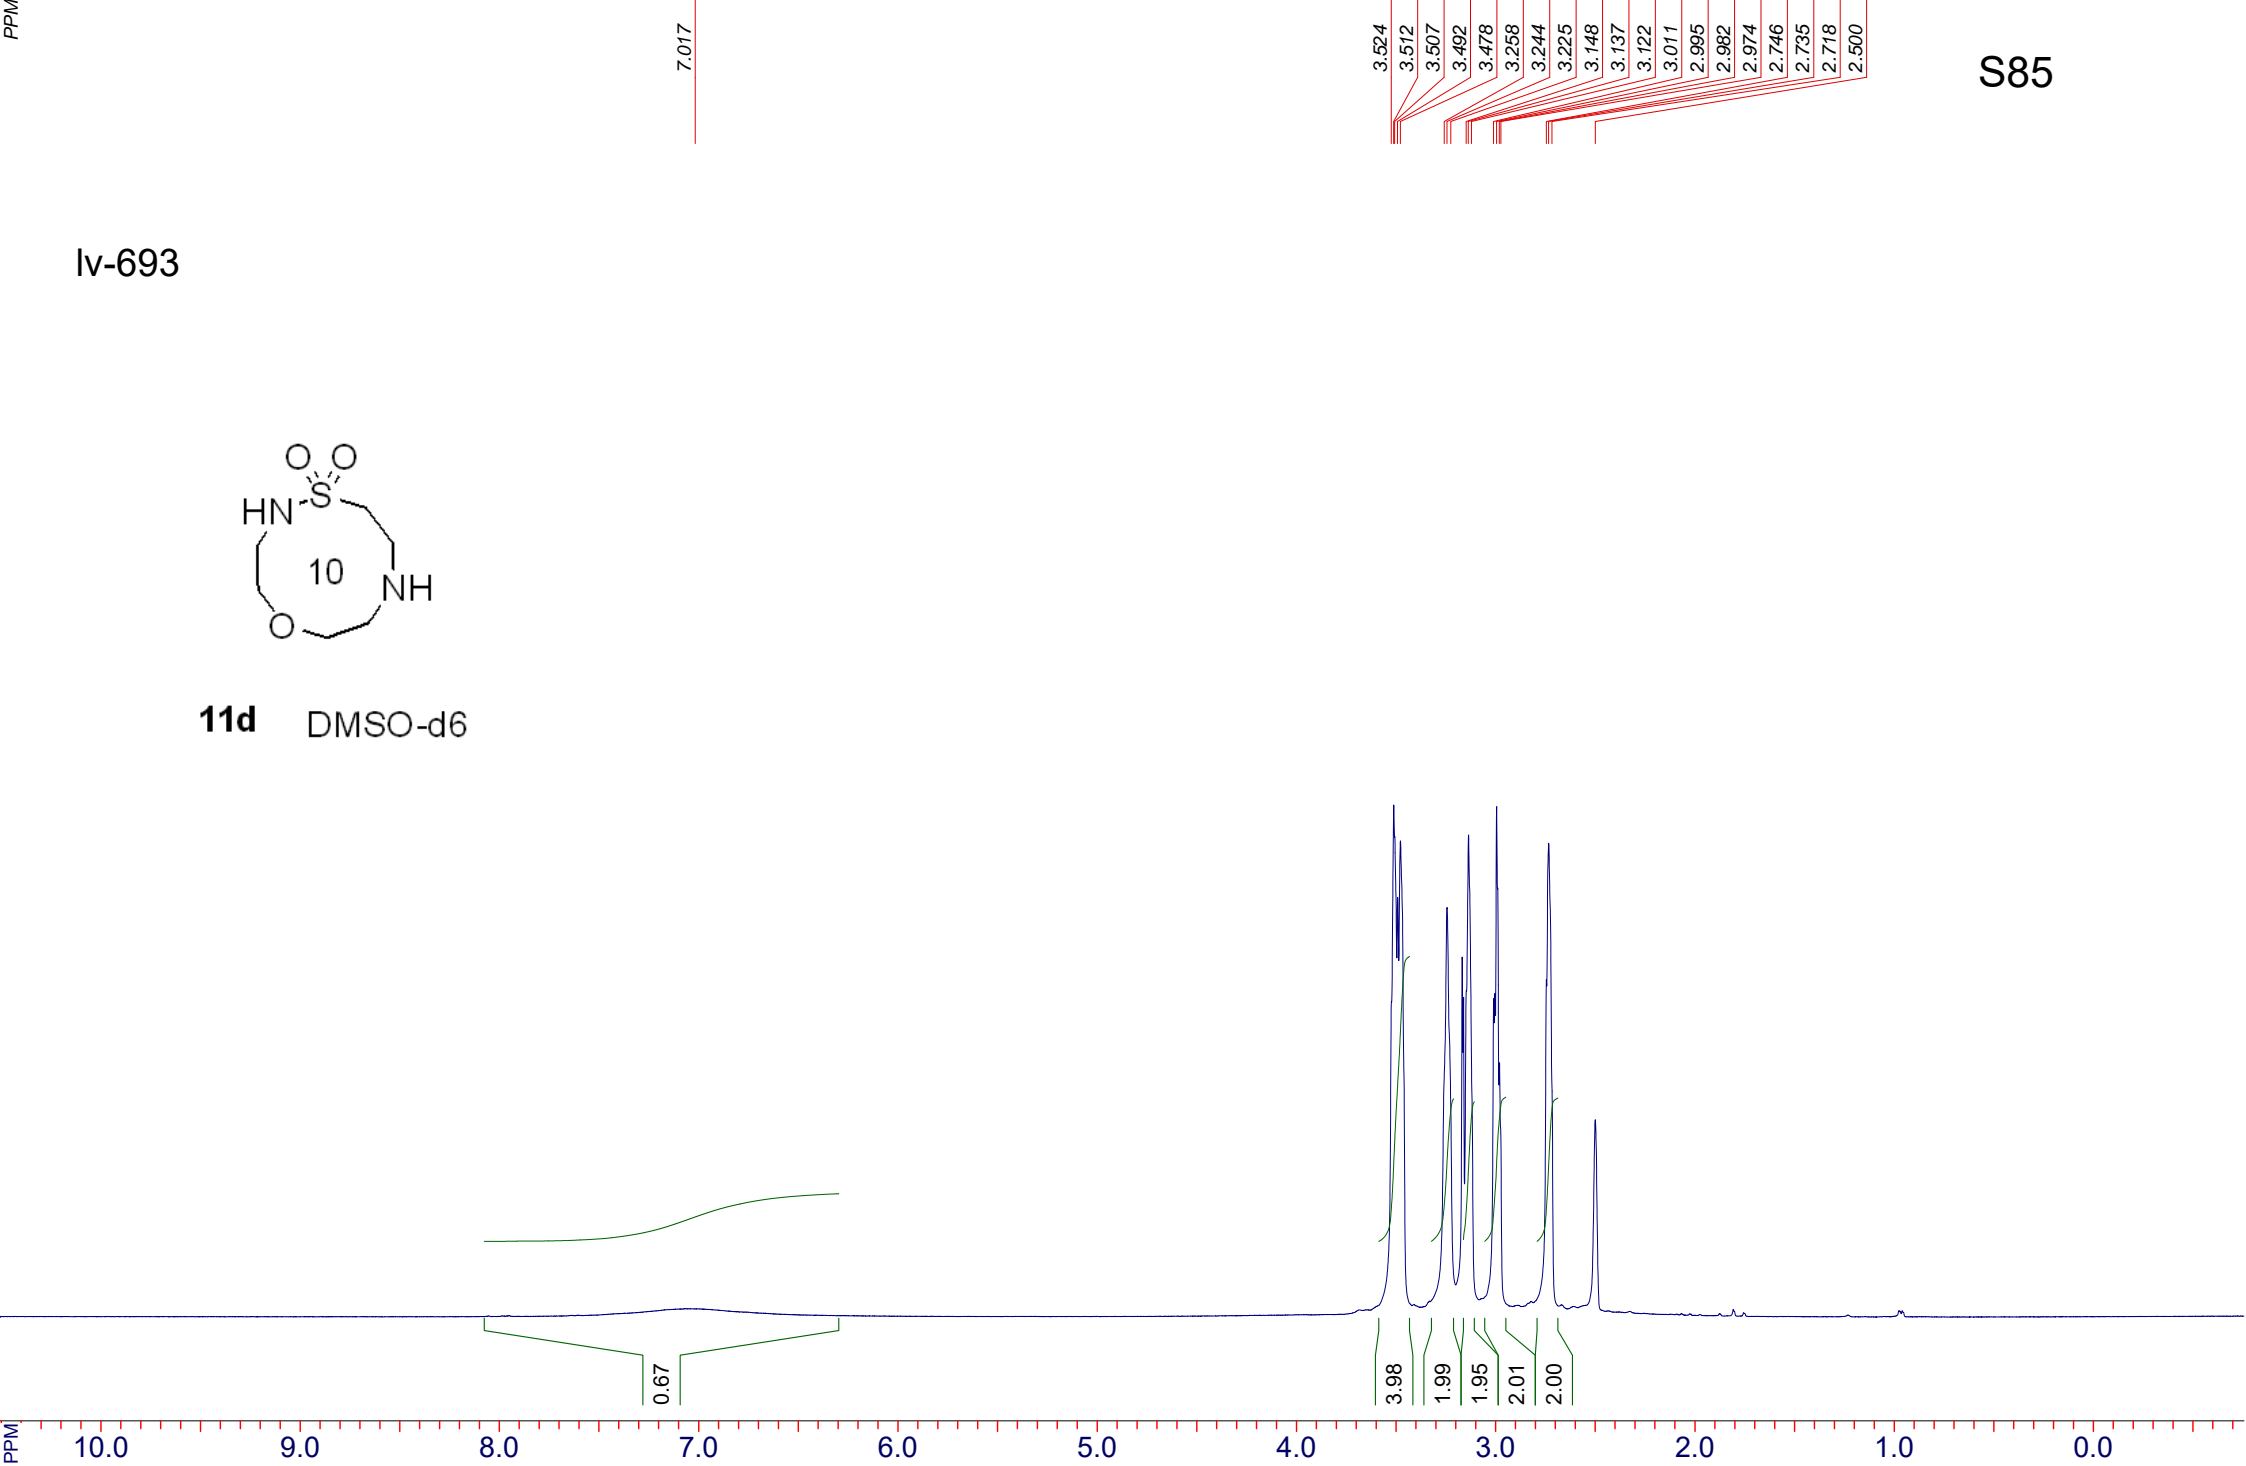

S85

File name: lv-693

Operator: nmr

SF: 400.1300 MHz

NSC: 1

PW: 0.00 usec, RG: 25

SI: 32768

Date: 09-Dec-2022

Solvent: DMSO

SW: 8224 Hz

TE: 300 K

AQ: 1.99 sec, RD: 0.00 sec

71.22  
68.6451.12  
47.43  
44.29  
43.63  
39.95

S86

lv-693\_C13.fid

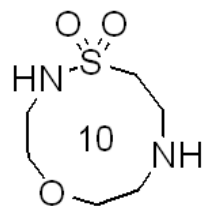**11d** DMSO-d6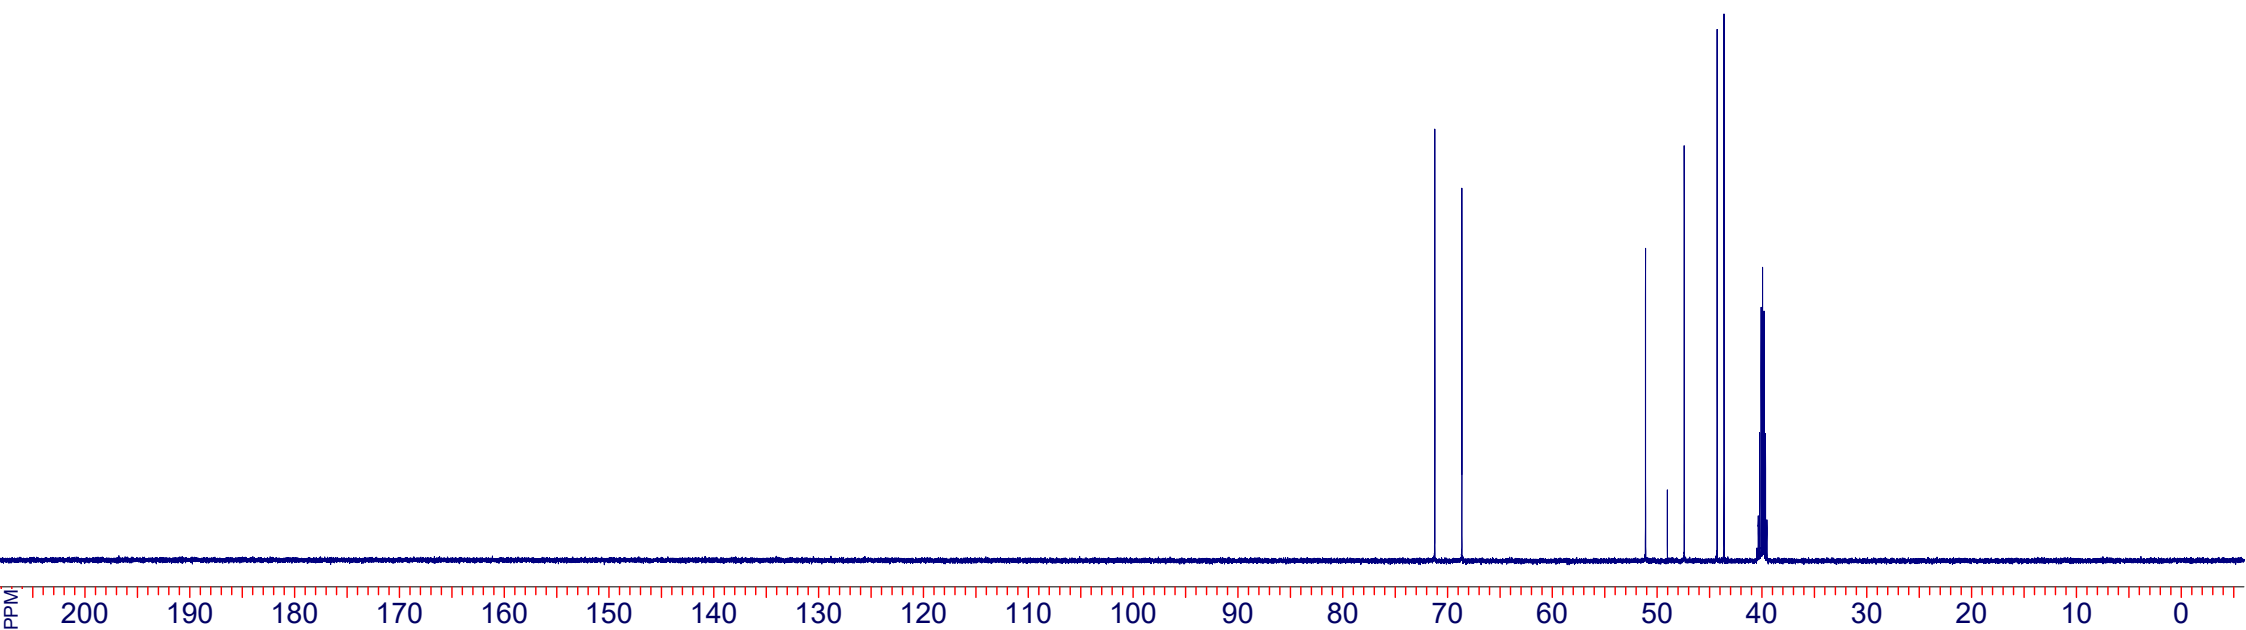

File name: lv-693\_C13.fid

Operator:

SF: 150.8304 MHz

NSC: 0

PW: 3.09 usec, RG: 60

SI: 65536

Date: 09-Dec-2022

Solvent: dms0

SW: 37879 Hz

TE: 298 K

AQ: 0.87 sec, RD: 0.00 sec



71.22  
68.6451.12  
47.42  
44.29  
43.63  
39.95

S87

lv-693\_C13APT.fid

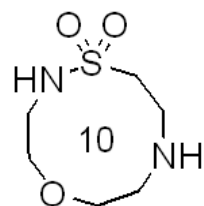**11d** DMSO-d6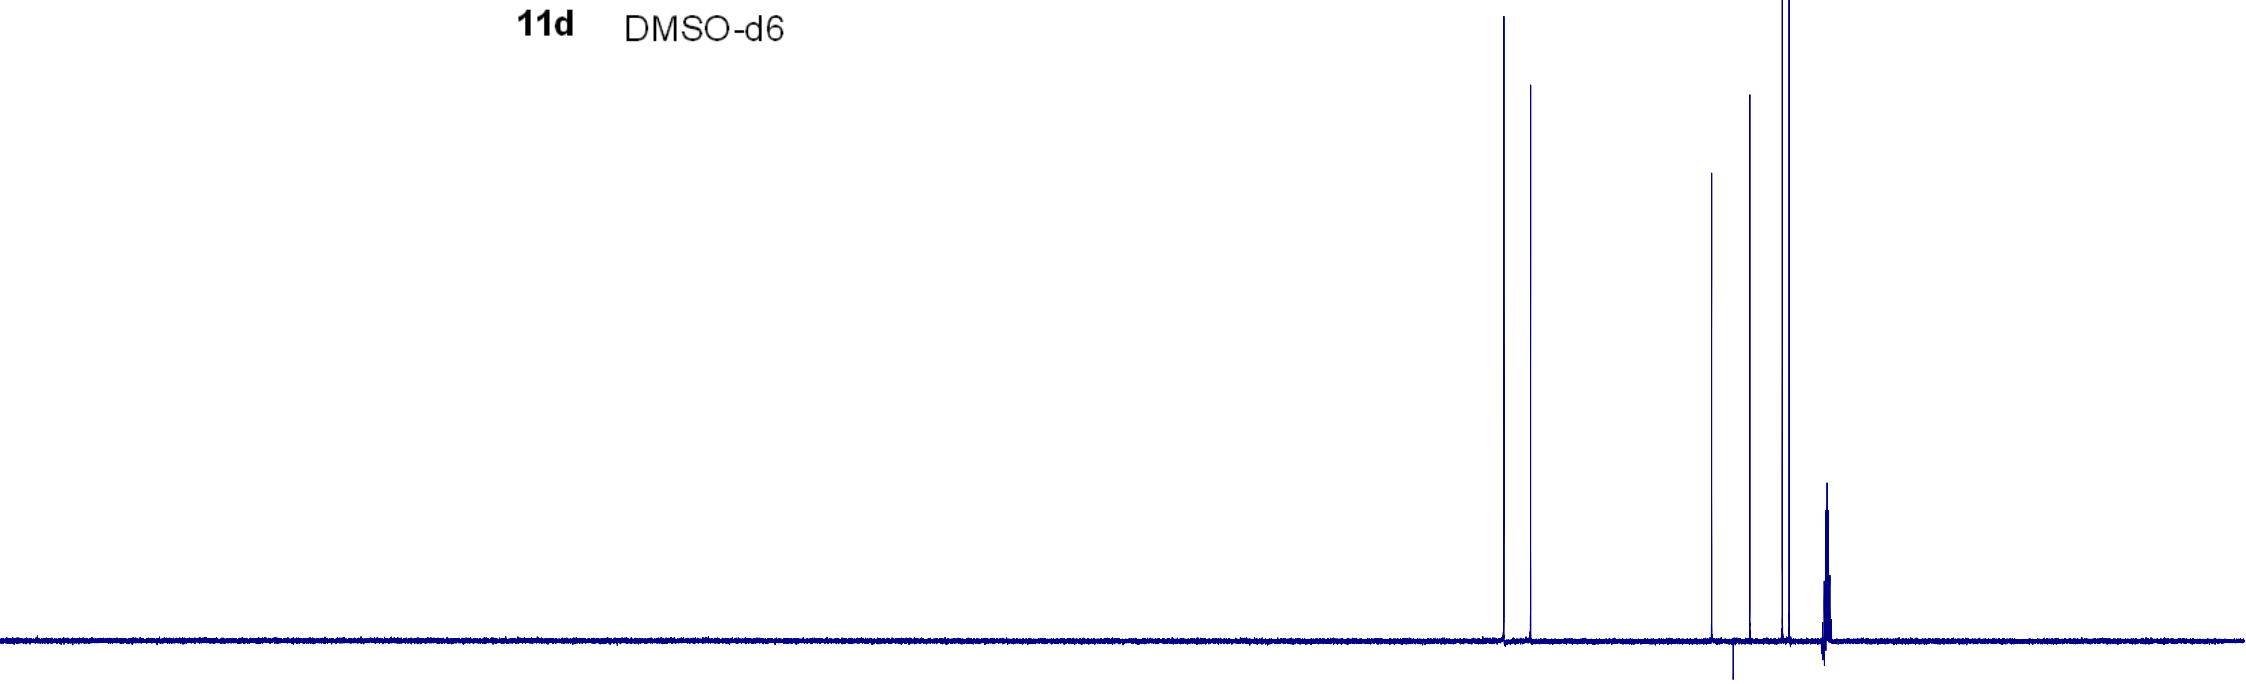

PPM 210 200 190 180 170 160 150 140 130 120 110 100 90 80 70 60 50 40 30 20 10

File name: lv-693\_C13APT.fid

Operator:

SF: 150.8333 MHz

NSC: 0

PW: 4.63 usec, RG: 60

SI: 131072

Date: 09-Dec-2022

Solvent: dms0

SW: 39063 Hz

TE: 298 K

AQ: 0.87 sec, RD: 0.00 sec

7.618  
7.599  
7.187  
7.169  
7.146  
7.043  
7.026  
7.007

3.359  
3.097  
2.995  
2.695  
2.502  
2.190  
1.699

lv-538.fid

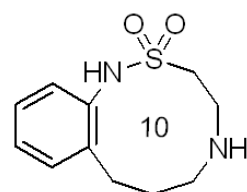

**11e** DMSO-d6

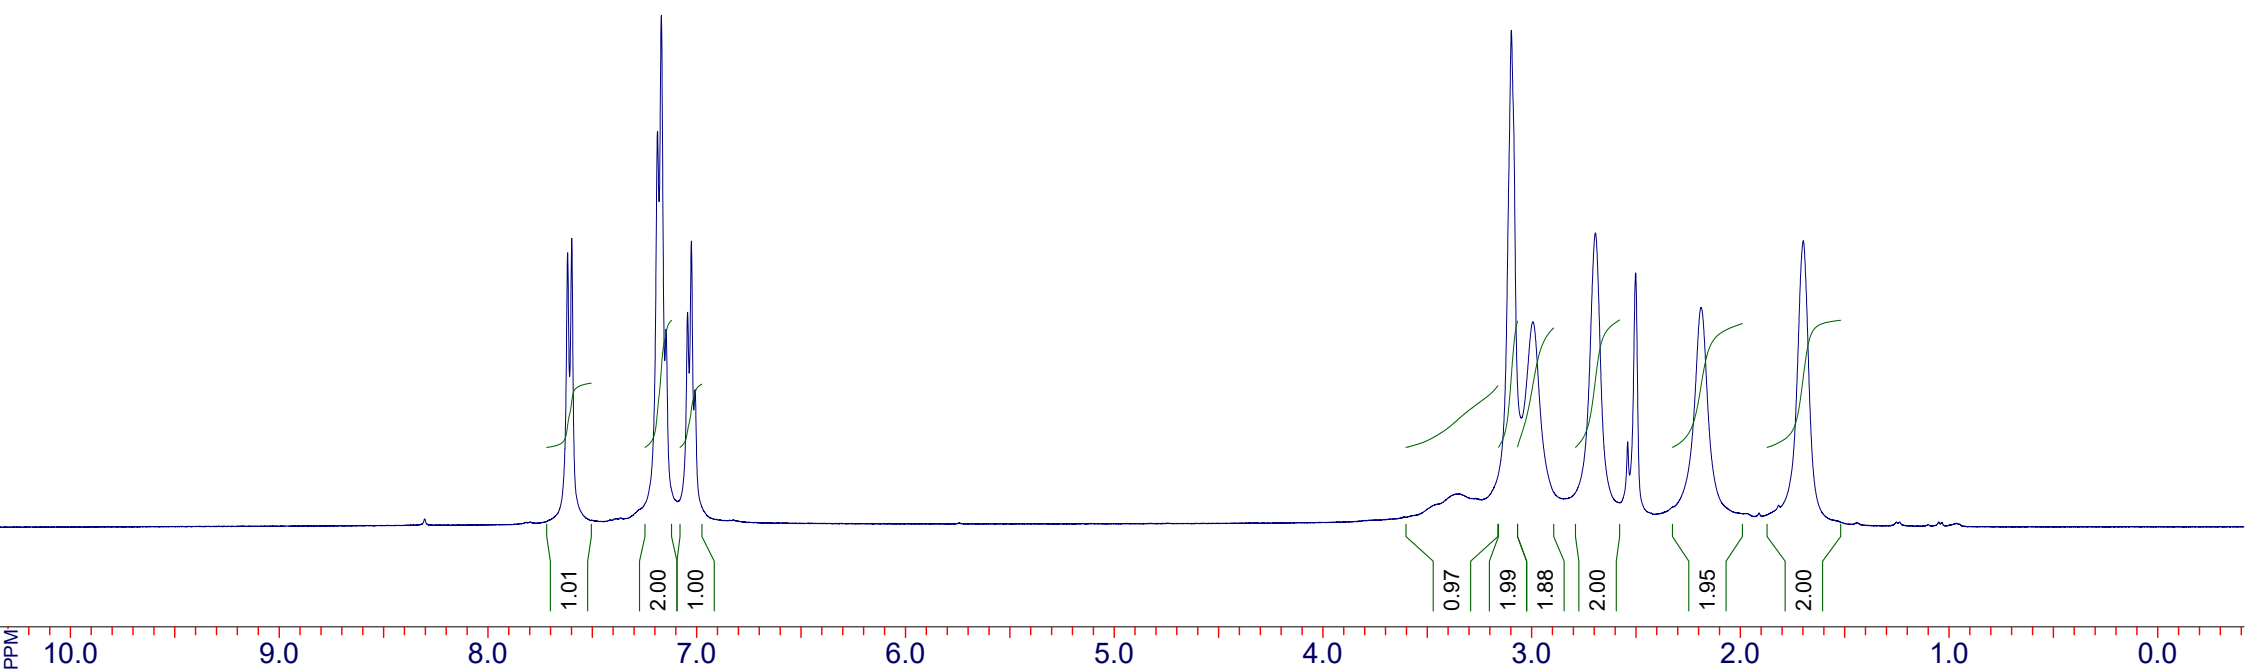

File name: lv-538.fid

Operator:

SF: 399.9733 MHz

NSC: 0

PW: 10.90 usec, RG: 24

SI: 32768

Date: 03-Oct-2022

Solvent: dms0

SW: 8000 Hz

TE: 298 K

AQ: 2.00 sec, RD: 0.00 sec

138.46  
131.24  
130.84  
127.50  
124.27  
118.6445.90  
43.53  
41.87  
40.0229.99  
26.57

S89

lv-538\_C13

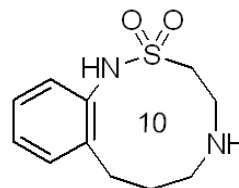**11e** DMSO-d6

PPM 180 170 160 150 140 130 120 110 100 90 80 70 60 50 40 30 20 10 0

File name: lv-538\_C13

Operator: nmr

SF: 100.6128 MHz

NSC: 204

PW: 0.00 usec, RG: 2050

SI: 32768

Date: 03-Oct-2022

Solvent: DMSO

SW: 26042 Hz

TE: 300 K

AQ: 0.98 sec, RD: 0.00 sec

PPM

S90

lv-538\_C13APT

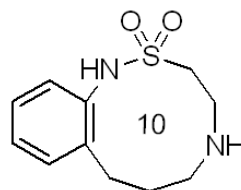**11e** DMSO-d6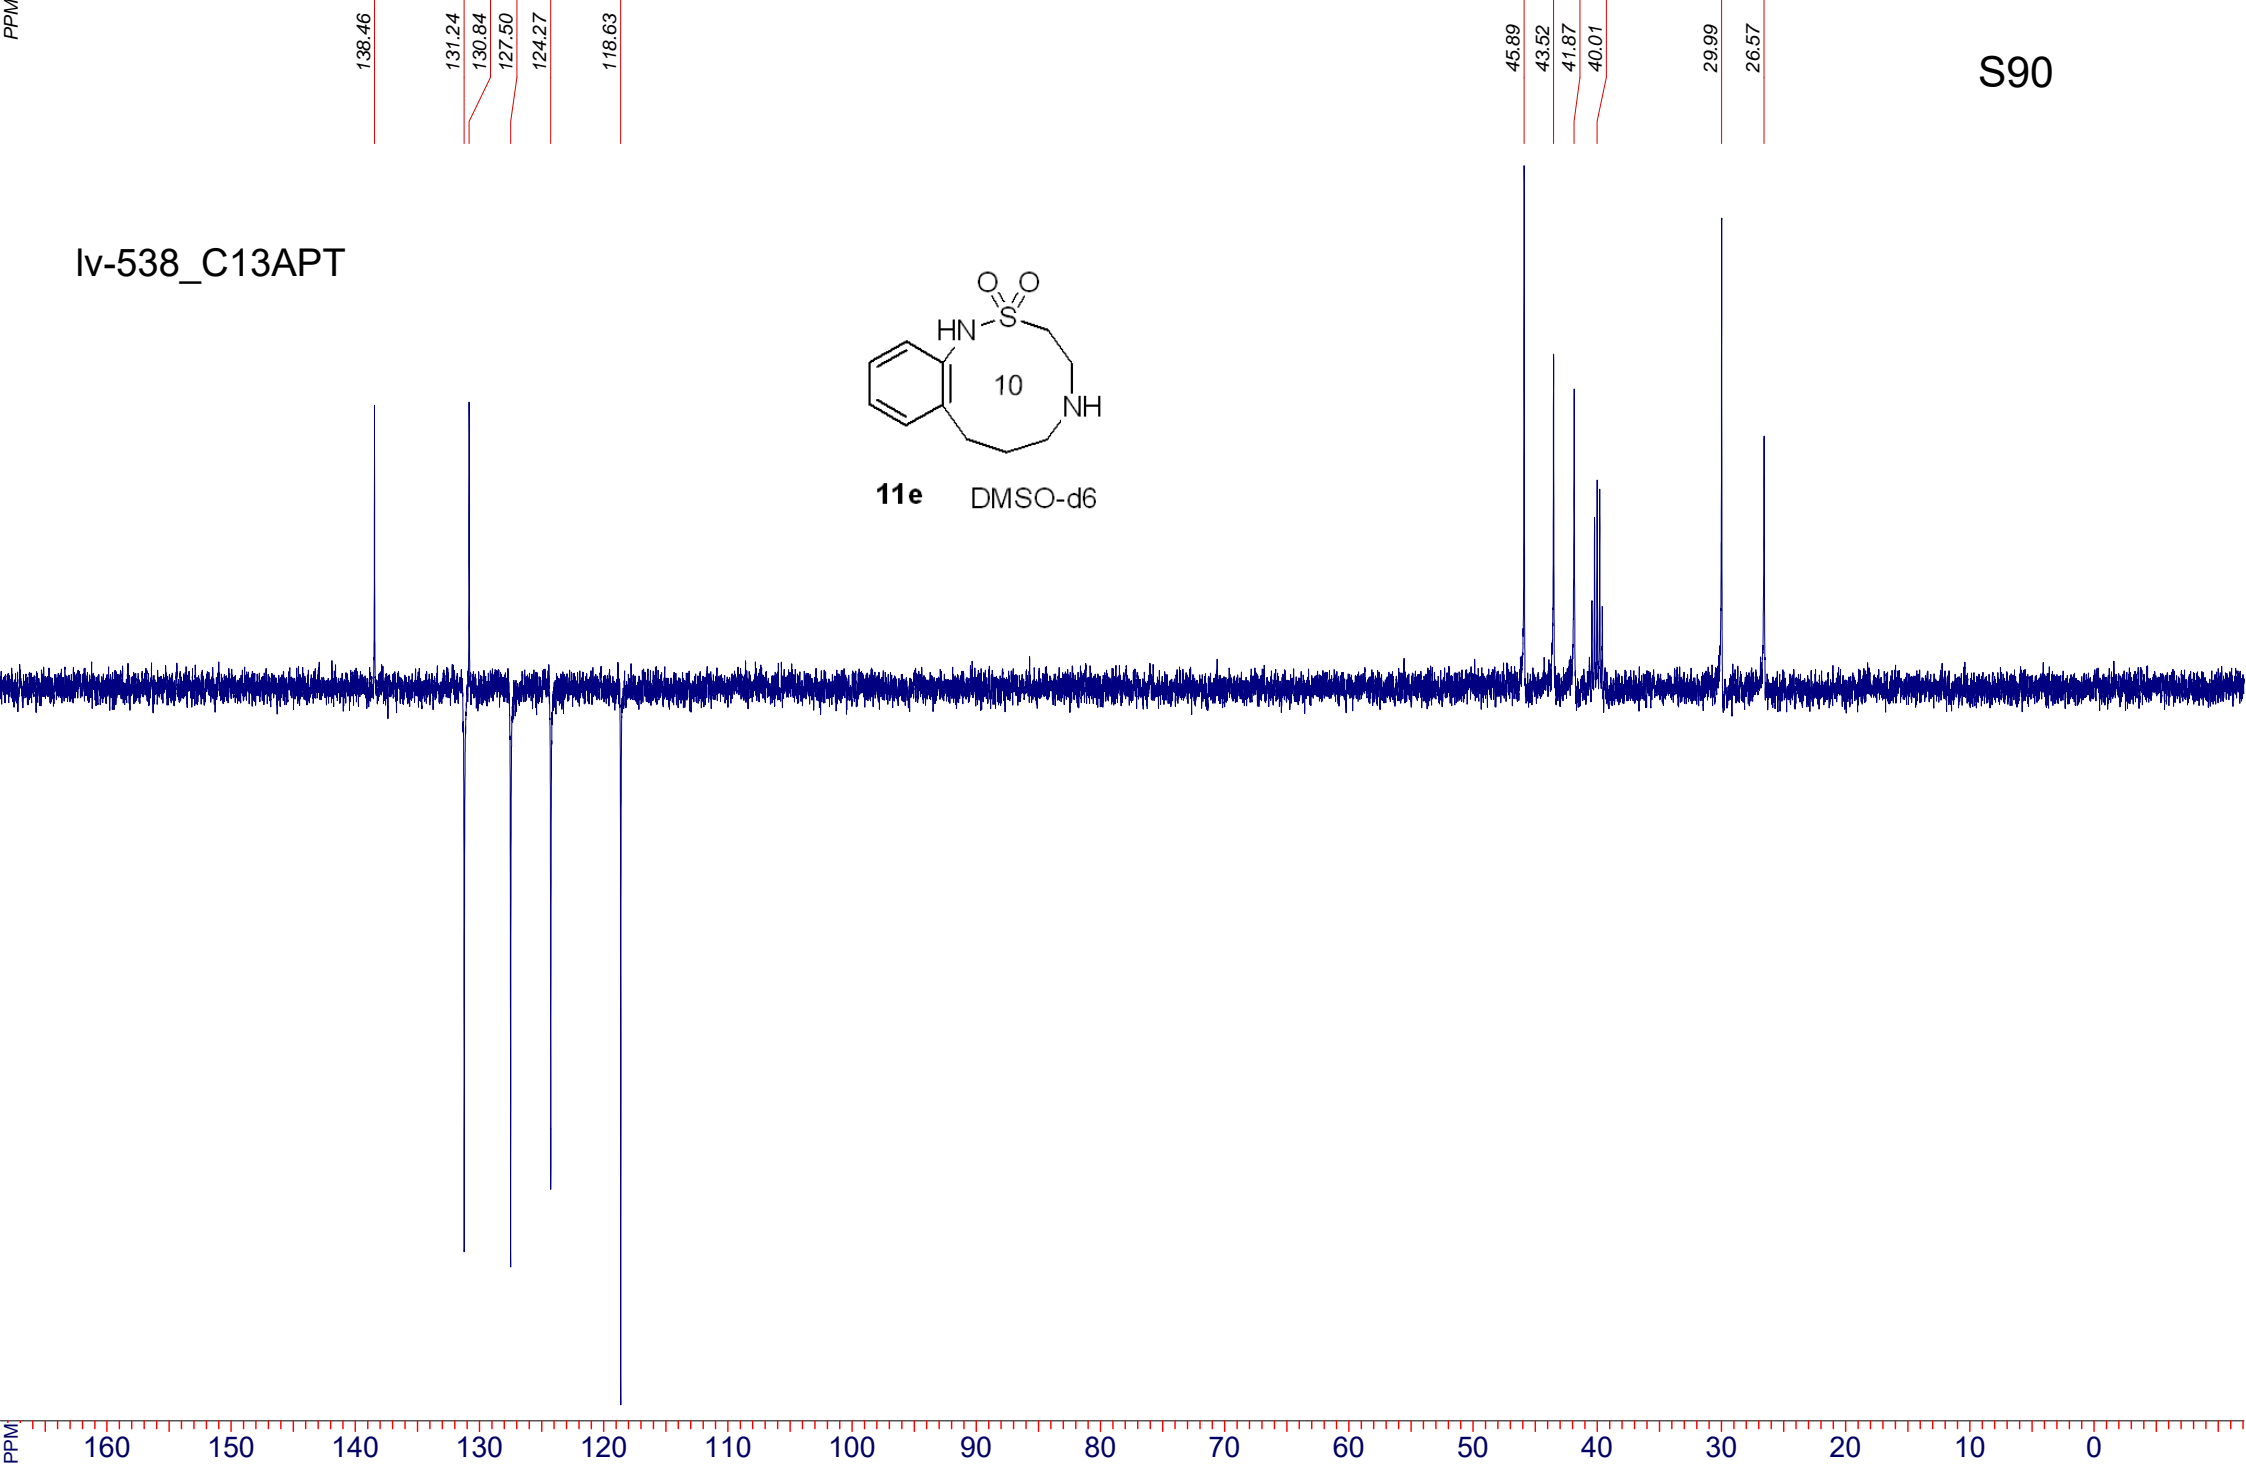

PPM

160 150 140 130 120 110 100 90 80 70 60 50 40 30 20 10 0

File name: lv-538\_C13APT

Operator: nmr

SF: 100.6128 MHz

NSC: 46

PW: 0.00 usec, RG: 2050

SI: 65536

Date: 03-Oct-2022

Solvent: DMSO

SW: 24038 Hz

TE: 300 K

AQ: 1.36 sec, RD: 0.00 sec

PPM

lv-12

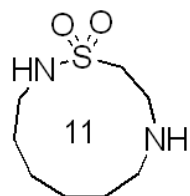**11f** DMSO-d6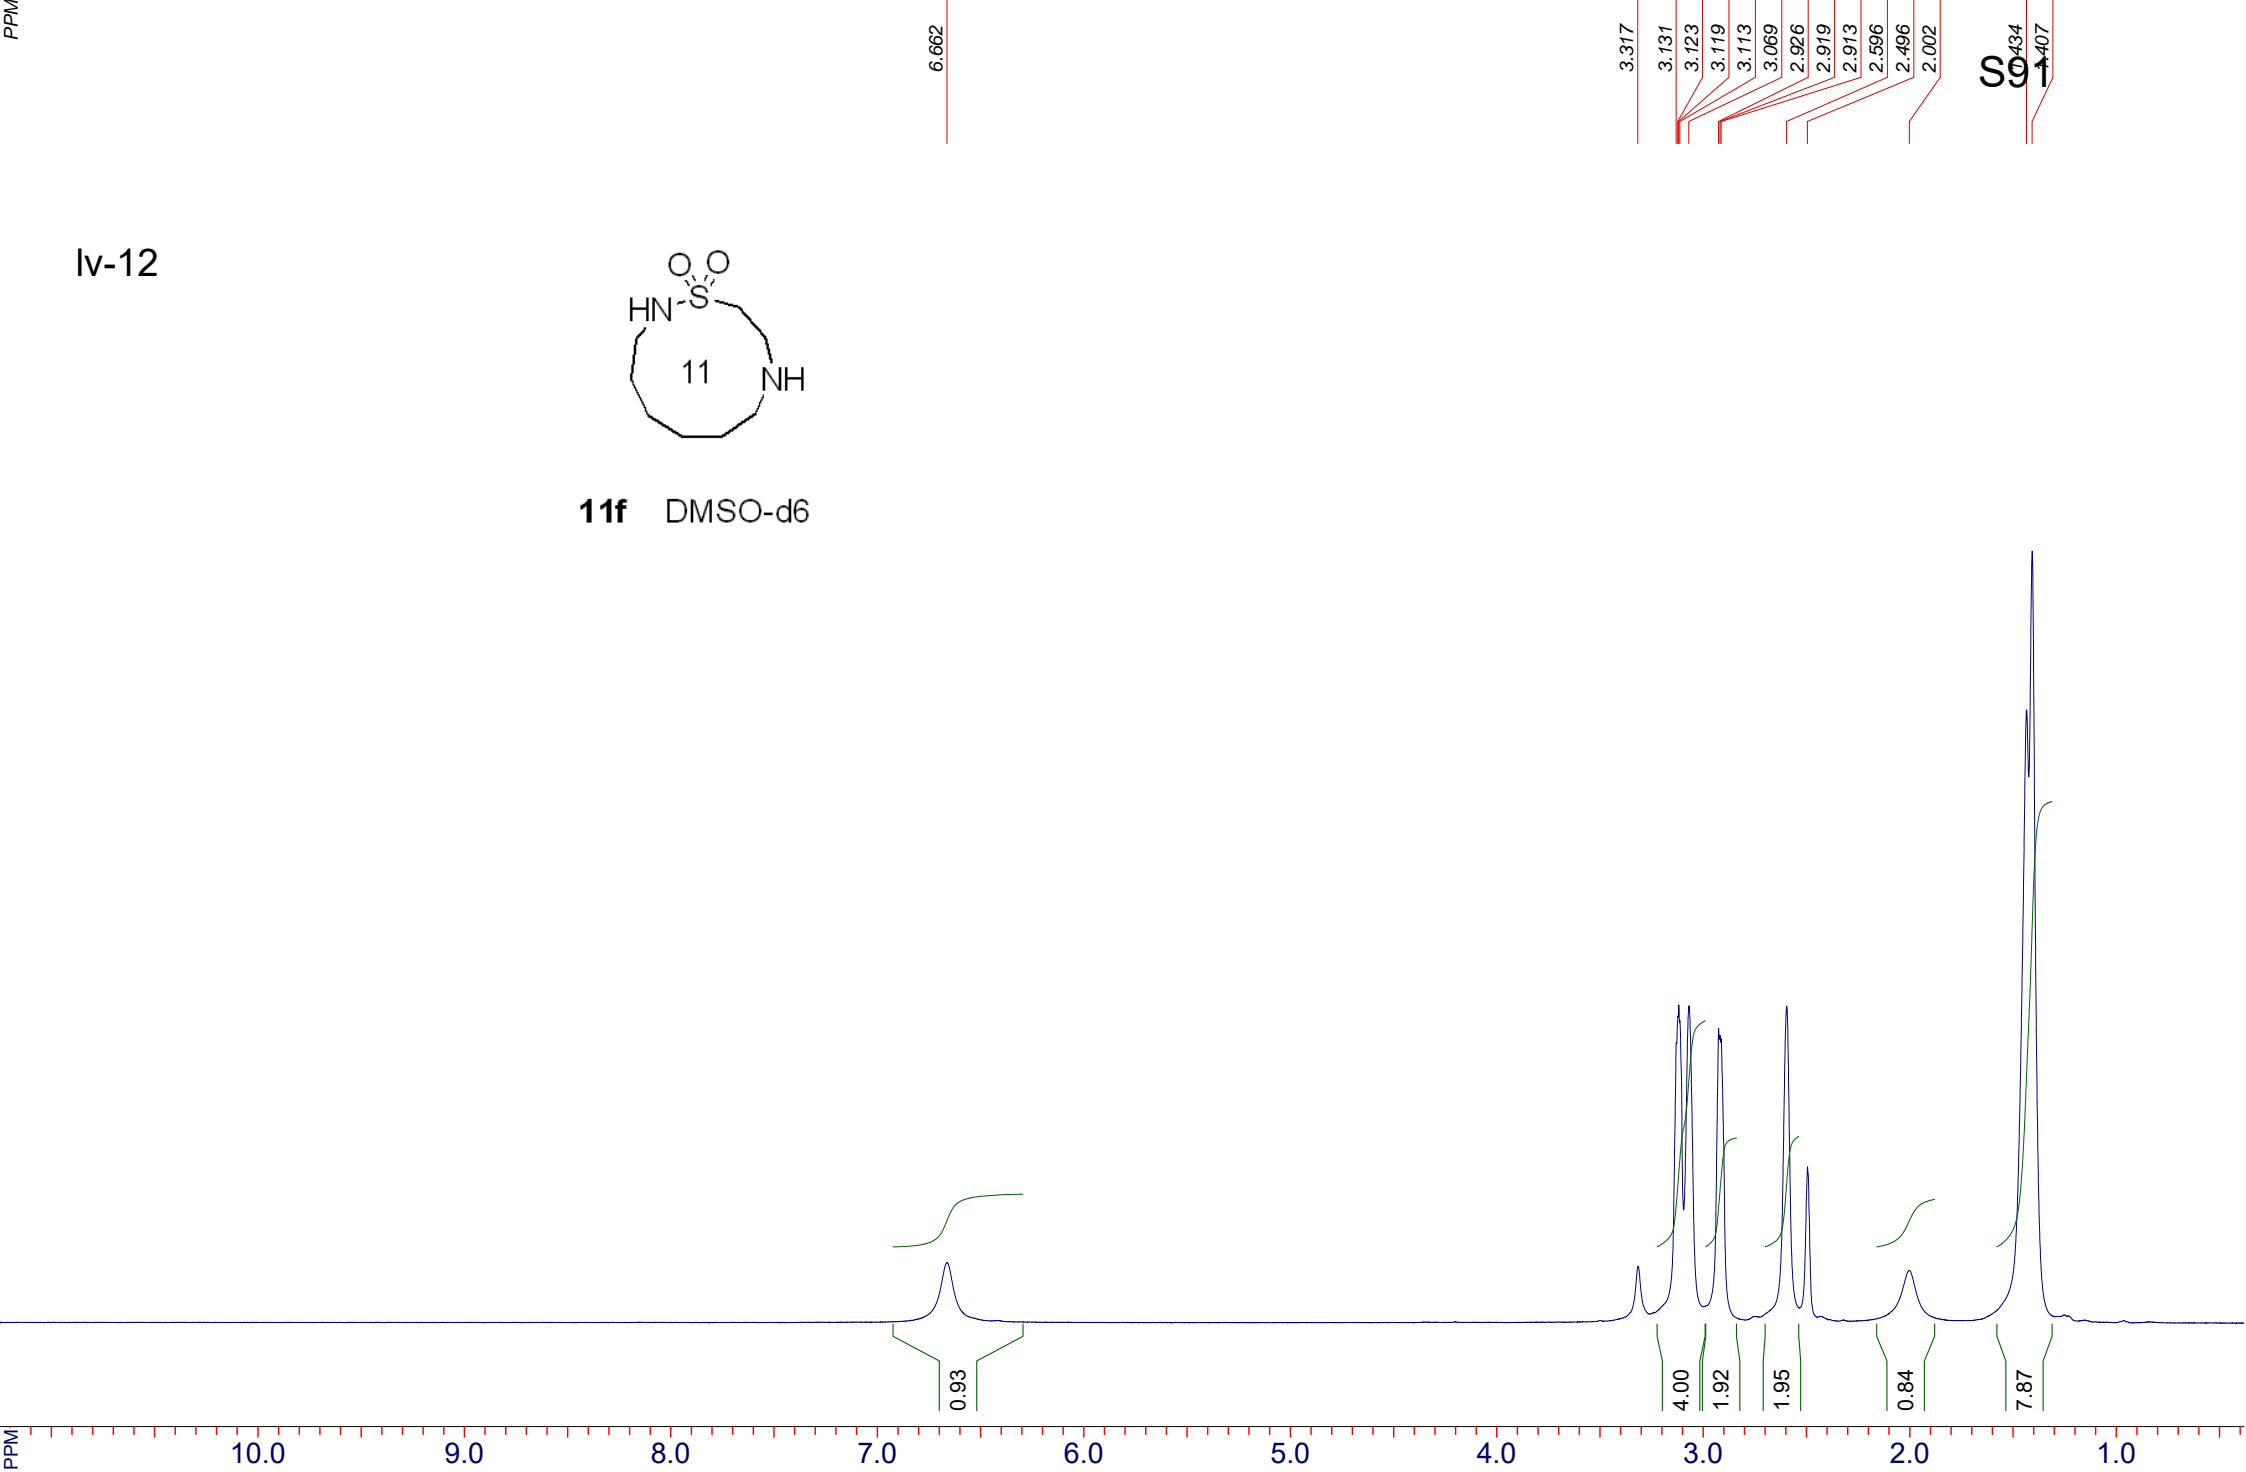

PPM

File name: lv-12

Operator: nmr

SF: 400.1300 MHz

NSC: 1

PW: 0.00 usec, RG: 25

SI: 32768

Date: 26-May-2022

Solvent: DMSO

SW: 8224 Hz

TE: 300 K

AQ: 1.99 sec, RD: 0.00 sec

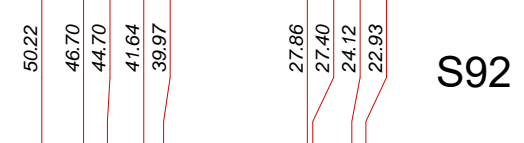

lv-12\_C13.fid

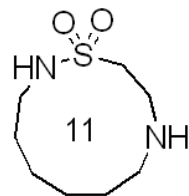**11f** DMSO-d6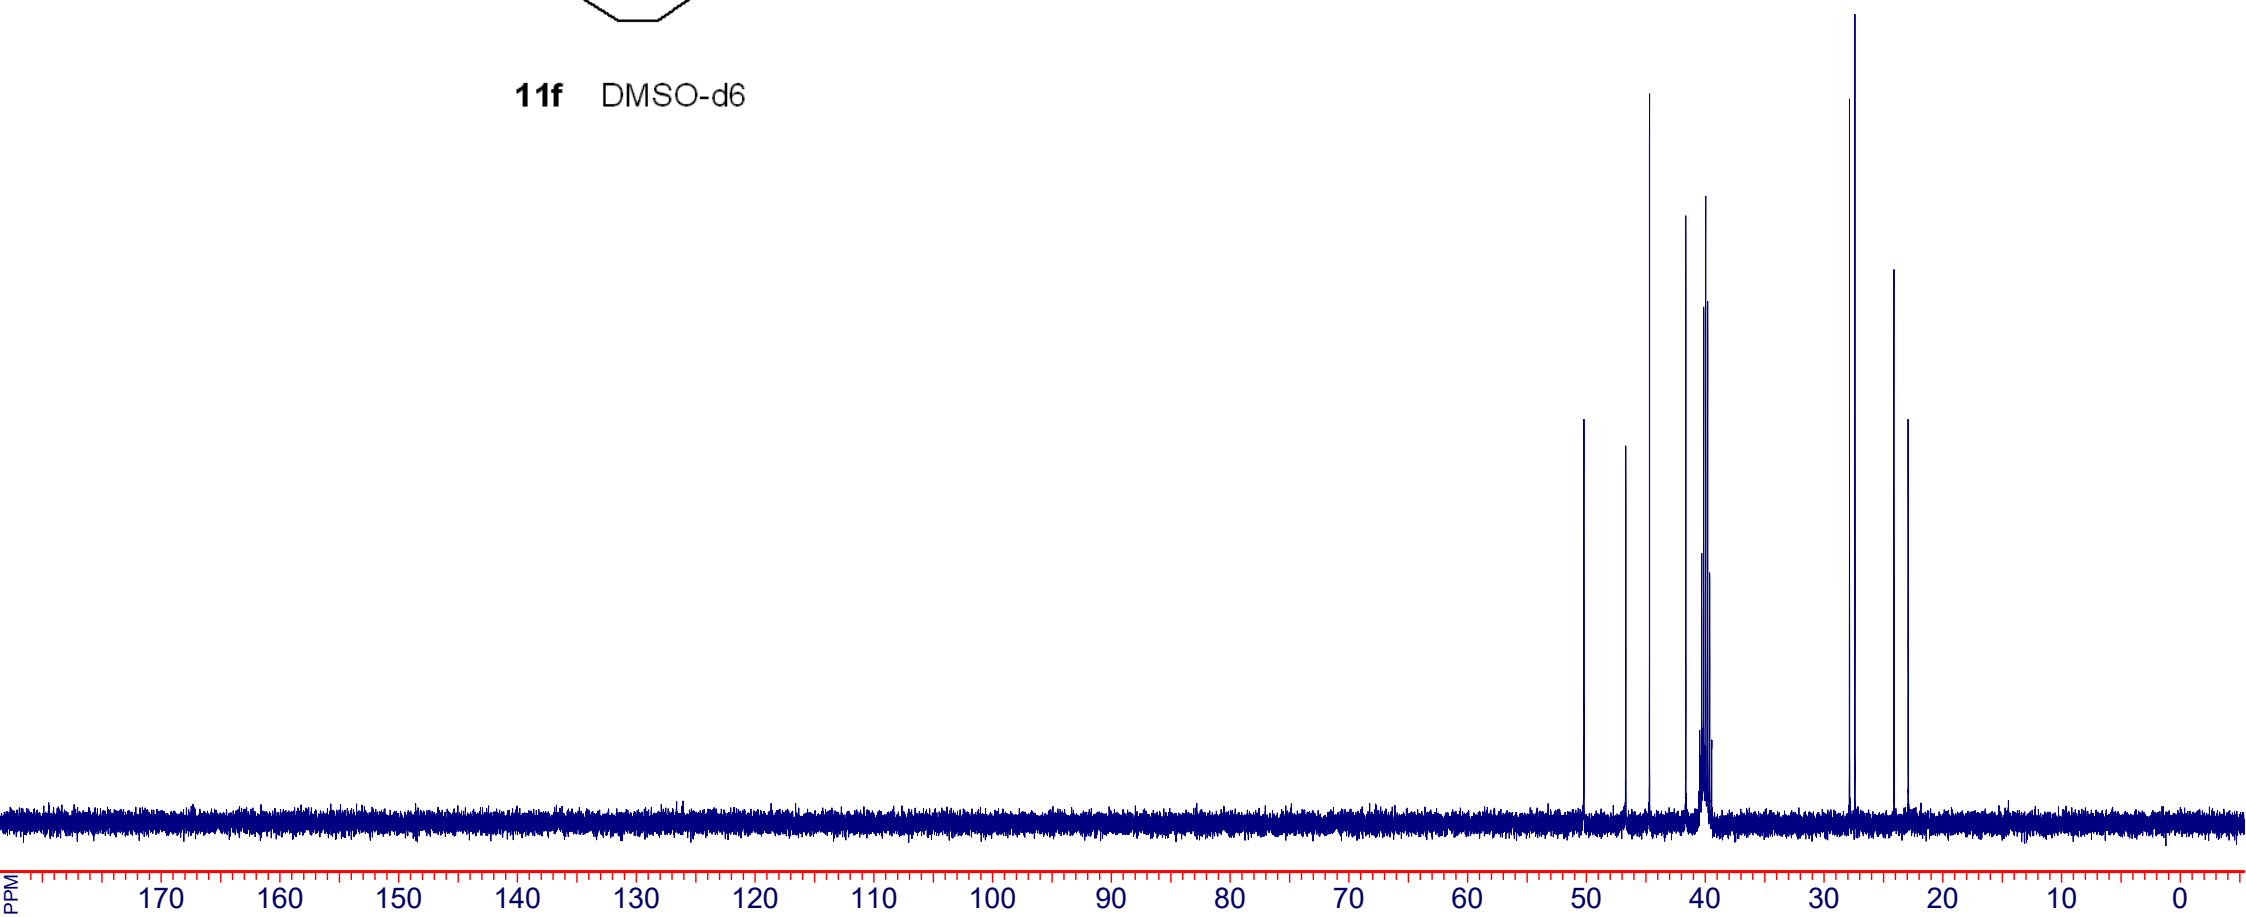

PPM

File name: lv-12\_C13.fid

Operator:

SF: 125.6926 MHz

NSC: 0

PW: 3.27 usec, RG: 60

SI: 65536

Date: 26-May-2022

Solvent: dms0

SW: 31250 Hz

TE: 298 K

AQ: 1.05 sec, RD: 0.00 sec

50.22  
46.70  
44.70  
41.64  
39.98  
27.87  
27.41  
24.13  
22.94  
S93

lv-12\_C13APT.fid

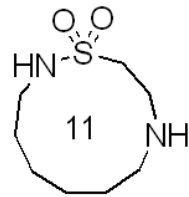

11f DMSO-d6

PPM 190 180 170 160 150 140 130 120 110 100 90 80 70 60 50 40 30 20 10 0

|                             |               |                  |           |                            |                                  |
|-----------------------------|---------------|------------------|-----------|----------------------------|----------------------------------|
| File name: lv-12_C13APT.fid | Operator:     | SF: 125.6925 MHz | NSC: 0    | PW: 5.00 usec, RG: 60      | SI: 131072                       |
| Date: 26-May-2022           | Solvent: dmso | SW: 32895 Hz     | TE: 298 K | AQ: 1.95 sec, RD: 0.00 sec | Automated Probe tuning parameter |

PPM

lv-1

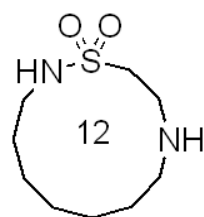**11g** DMSO-d<sub>6</sub>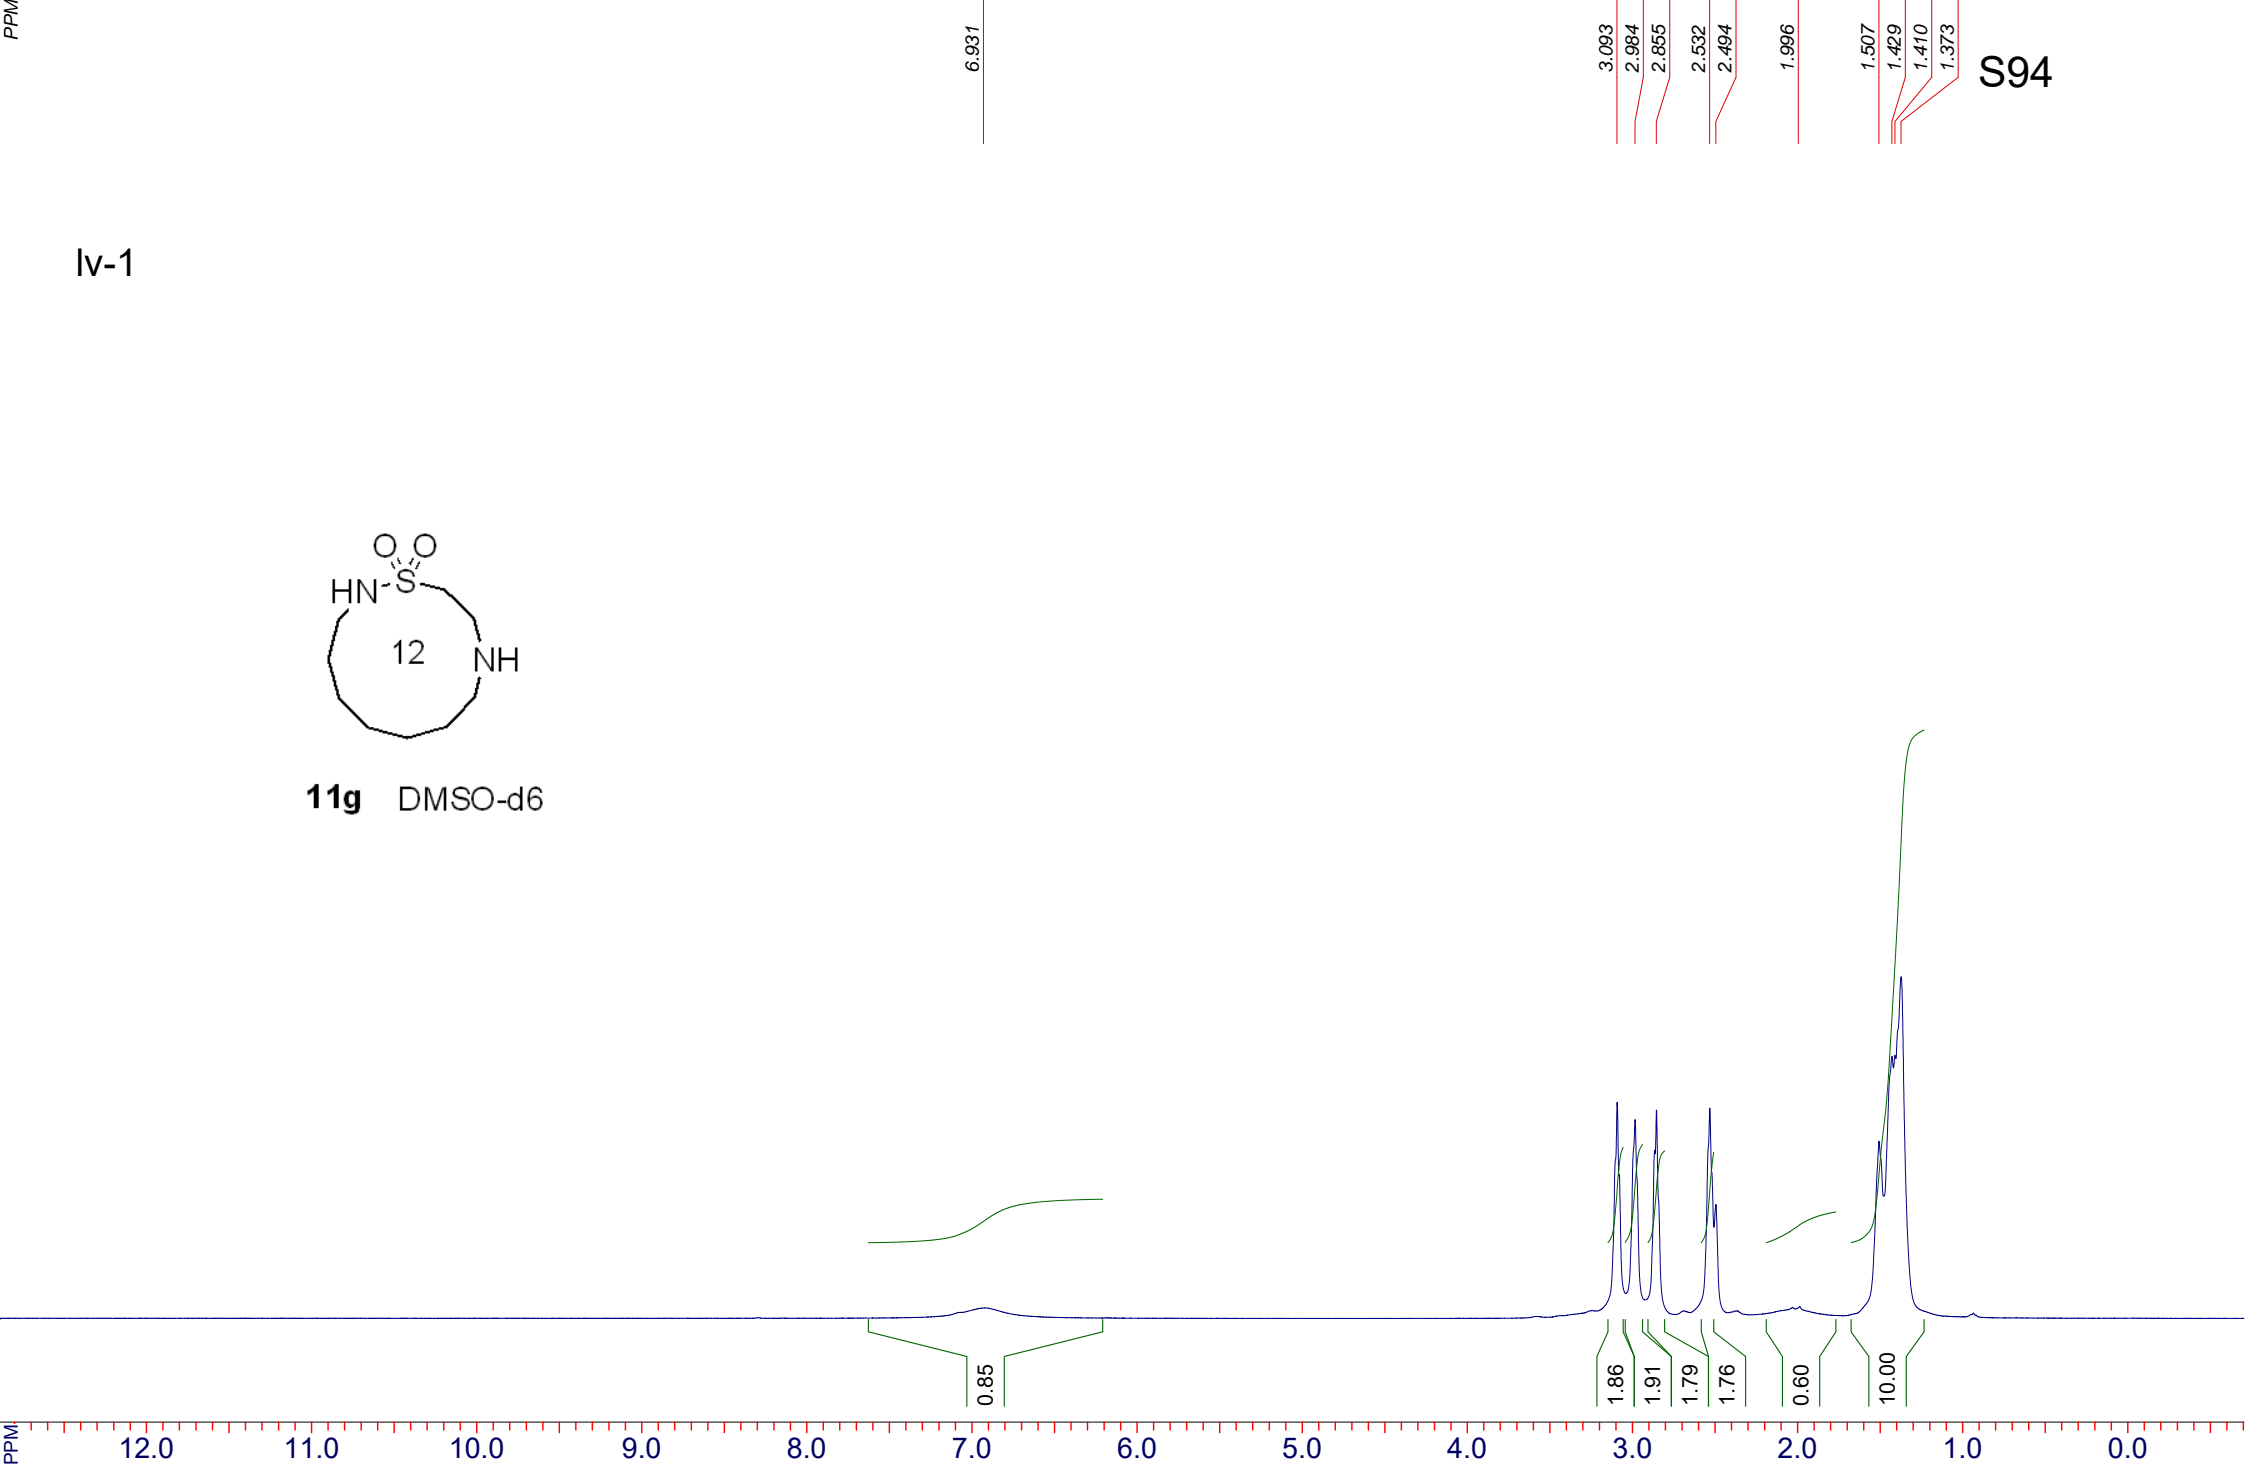

S94

PPM

12.0 11.0 10.0 9.0 8.0 7.0 6.0 5.0 4.0 3.0 2.0 1.0 0.0

File name: lv-1

Operator: nmr

SF: 400.1300 MHz

NSC: 1

PW: 0.00 usec, RG: 25

SI: 32768

Date: 26-May-2022

Solvent: DMSO

SW: 8224 Hz

TE: 300 K

AQ: 1.99 sec, RD: 0.00 sec



lv-1\_C13.fid

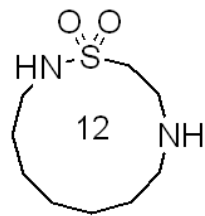**11g** DMSO-d6

50.72  
46.43  
42.94  
40.06  
39.97  
25.89  
24.97  
24.30  
23.52  
23.35  
S95

PPM 170 160 150 140 130 120 110 100 90 80 70 60 50 40 30 20 10 0

File name: lv-1\_C13.fid

Operator:

SF: 150.8304 MHz

NSC: 0

PW: 3.09 usec, RG: 60

SI: 65536

Date: 26-May-2022

Solvent: dms0

SW: 37879 Hz

TE: 298 K

AQ: 0.87 sec, RD: 0.00 sec

PPM

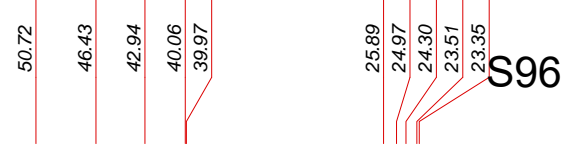

lv-1\_C13APT.fid

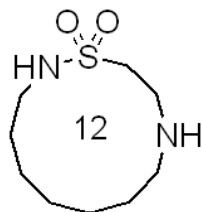**11g** DMSO-d6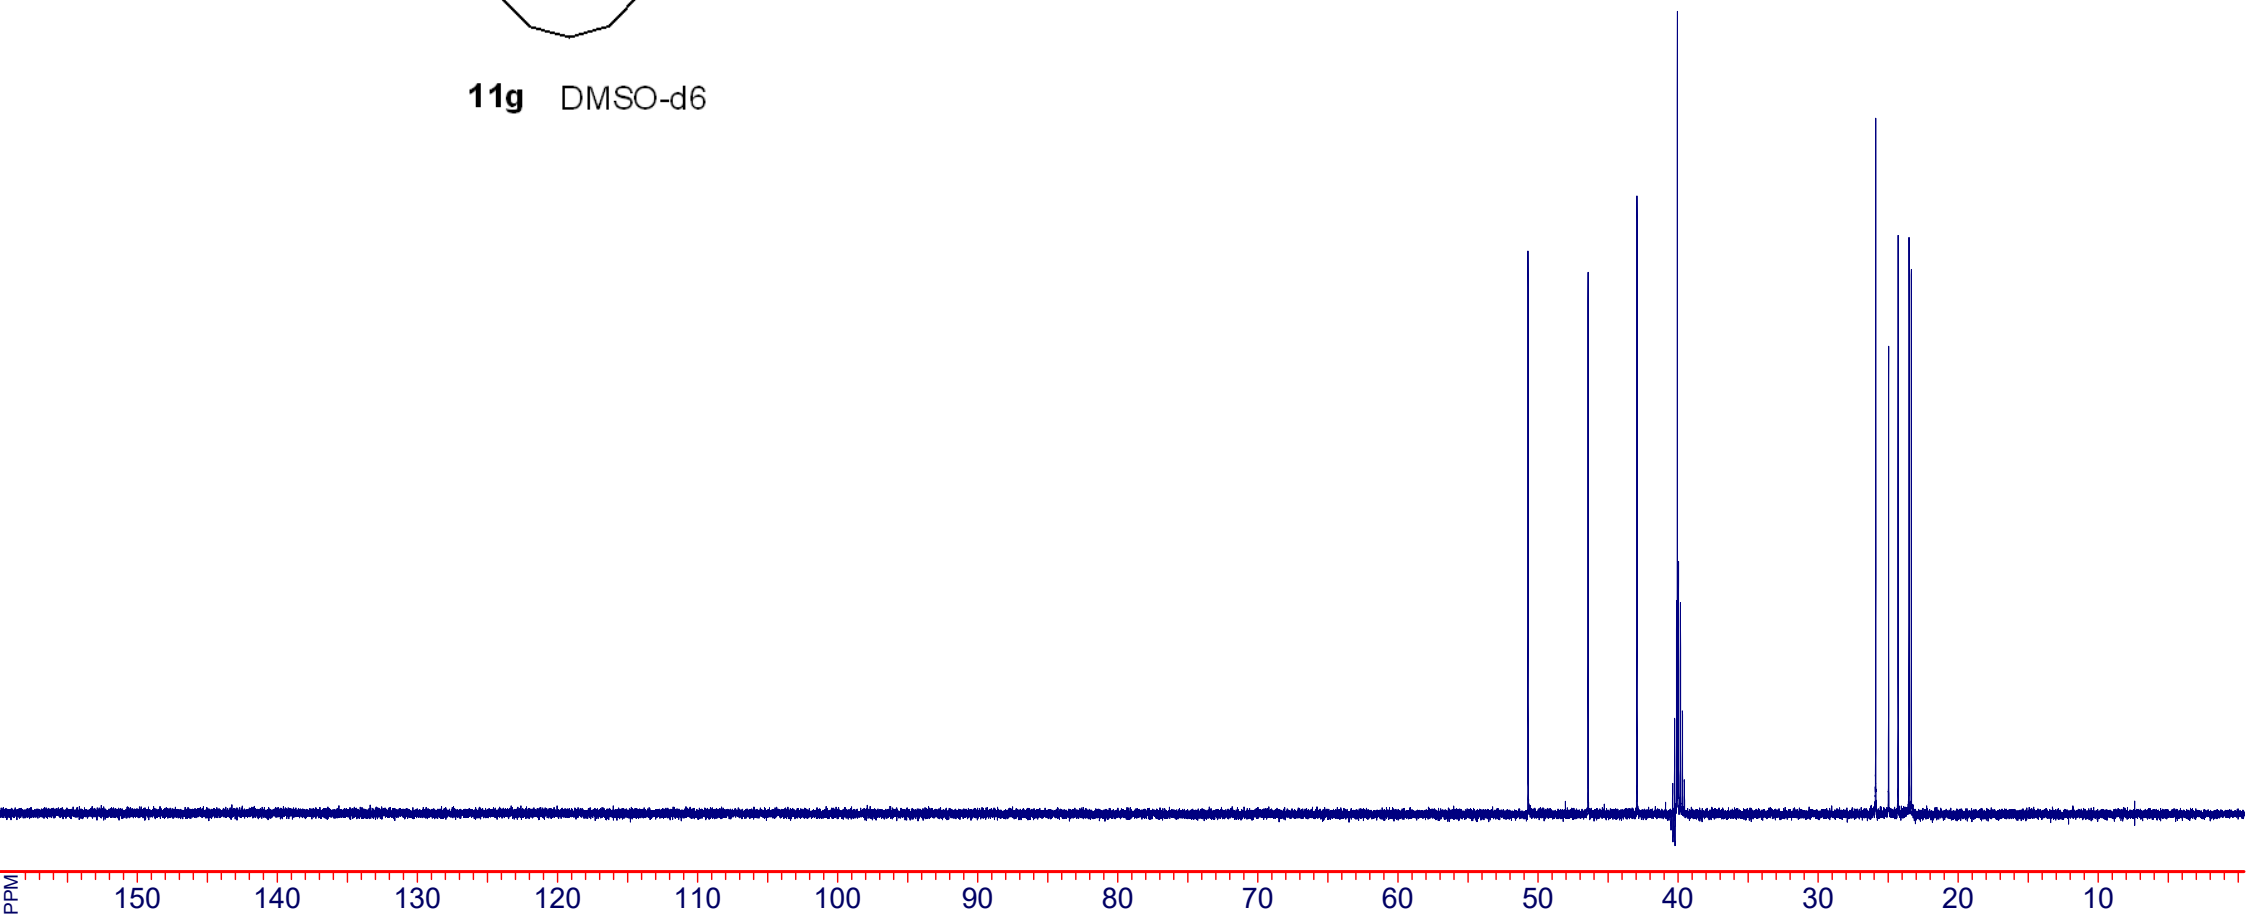

PPM

File name: lv-1\_C13APT.fid

Operator:

SF: 150.8333 MHz

NSC: 0

PW: 4.63 usec, RG: 60

SI: 131072

Date: 26-May-2022

Solvent: dmso

SW: 39063 Hz

TE: 298 K

AQ: 0.87 sec, RD: 0.00 sec

lv-887

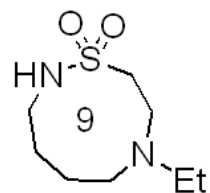**11h** DMSO-d6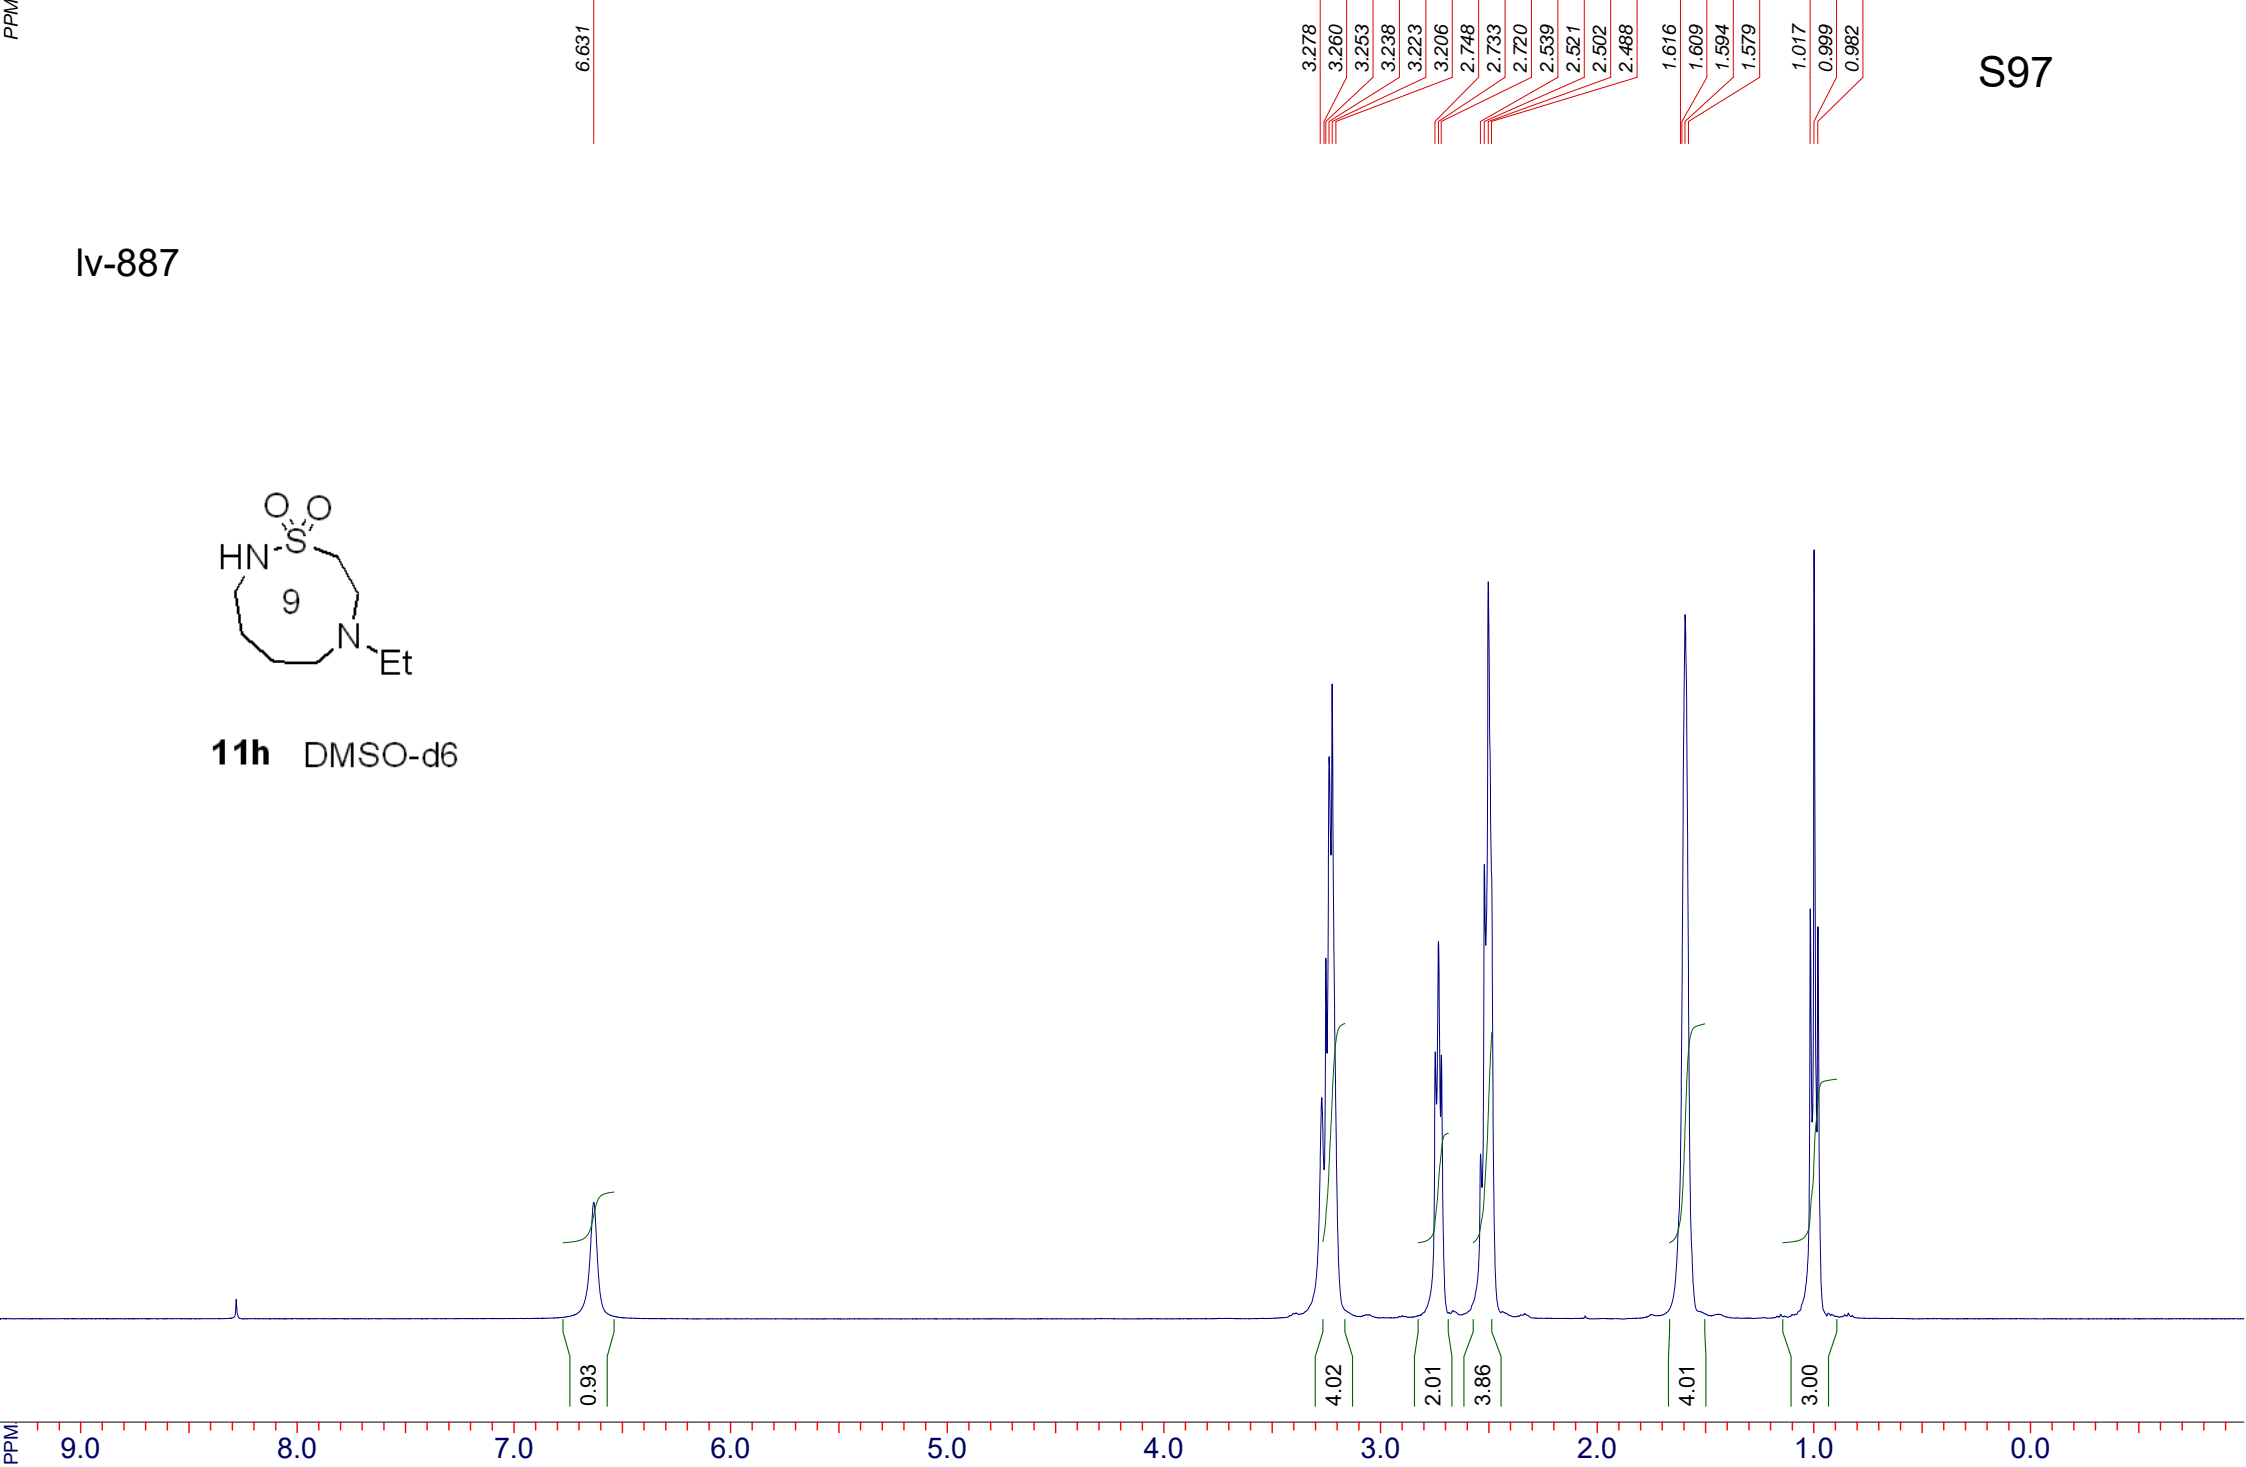

File name: lv-887

Operator: nmr

SF: 400.1300 MHz

NSC: 1

PW: 0.00 usec, RG: 25

SI: 32768

Date: 27-Feb-2023

Solvent: DMSO

SW: 8224 Hz

TE: 300 K

AQ: 1.99 sec, RD: 0.00 sec

PPM

lv-887-C13

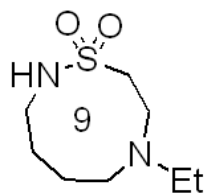**11h** DMSO-d6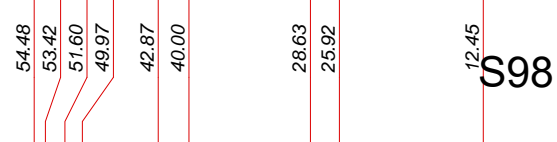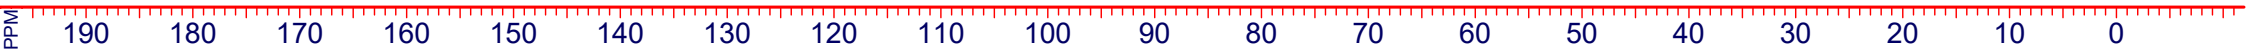

File name: lv-887-C13

Operator: nmr

SF: 100.6128 MHz

NSC: 114

PW: 0.00 usec, RG: 2050

SI: 32768

Date: 27-Feb-2023

Solvent: DMSO

SW: 26042 Hz

TE: 300 K

AQ: 0.98 sec, RD: 0.00 sec

PPM

lv-887-C13APT

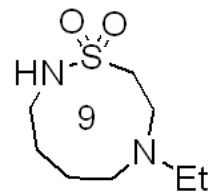**11h** DMSO-d6

54.48  
53.41  
51.59  
49.95  
42.87  
40.01  
28.63  
25.92  
12.44

S99

PPM 170 160 150 140 130 120 110 100 90 80 70 60 50 40 30 20 10 0 -10

File name: lv-887-C13APT

Operator: nmr

SF: 100.6128 MHz

NSC: 105

PW: 0.00 usec, RG: 2050

SI: 65536

Date: 28-Feb-2023

Solvent: DMSO

SW: 24038 Hz

TE: 300 K

AQ: 1.36 sec, RD: 0.00 sec

lv-22

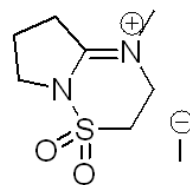**12a** DMSO-d6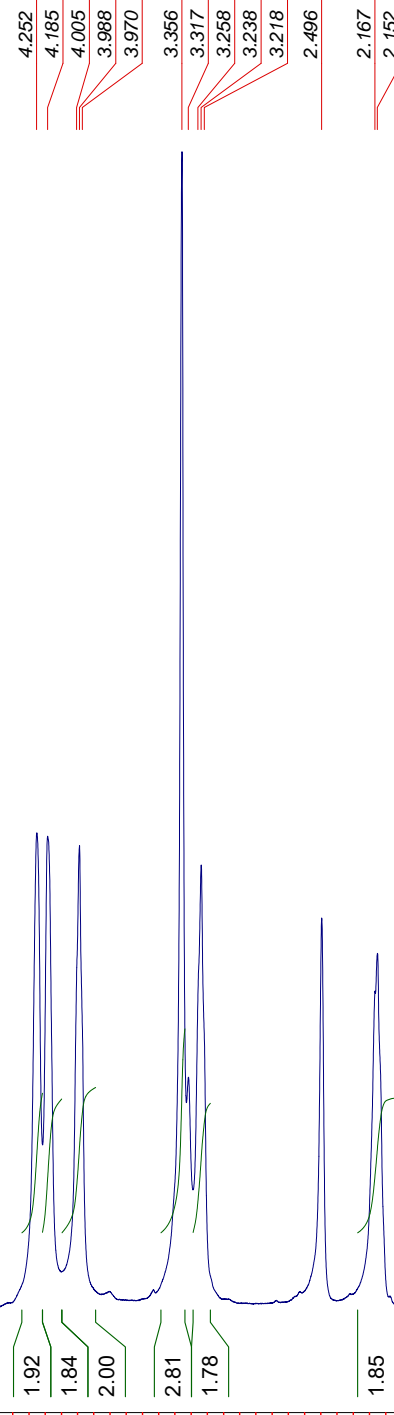

PPM

169.44

50.15  
49.99  
44.66  
42.84  
40.08  
33.6018.59  
S101

lv-22\_C13

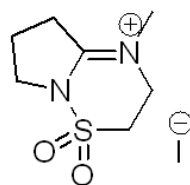**12a** DMSO-d6

PPM

200

180

160

140

120

100

80

60

40

20

0

File name: lv-22\_C13

Operator: nmr

SF: 100.6128 MHz

NSC: 91

PW: 0.00 usec, RG: 2050

SI: 32768

Date: 27-May-2022

Solvent: DMSO

SW: 26042 Hz

TE: 300 K

AQ: 0.98 sec, RD: 0.00 sec

lv-22\_C13APT

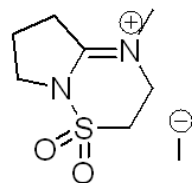**12a** DMSO-d6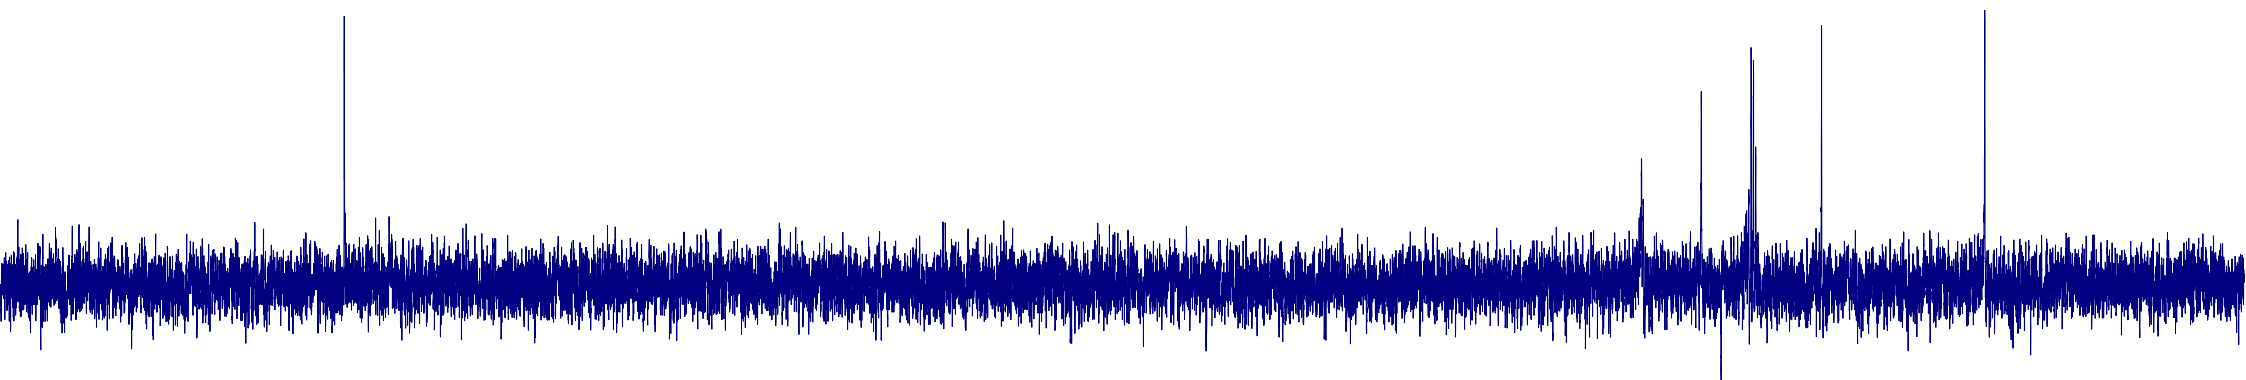

PPM 190 180 170 160 150 140 130 120 110 100 90 80 70 60 50 40 30 20 10 0

File name: lv-22\_C13APT

Operator: nmr

SF: 100.6128 MHz

NSC: 455

PW: 0.00 usec, RG: 2050

SI: 65536

Date: 27-May-2022

Solvent: DMSO

SW: 24038 Hz

TE: 300 K

AQ: 1.36 sec, RD: 0.00 sec



PPM

lv33

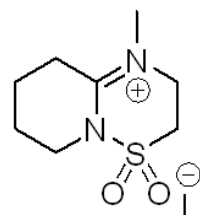**12b** DMSO-d6

4.326  
4.306  
4.294  
4.257  
4.241  
4.232  
4.212  
3.709  
3.688  
3.672  
3.333  
2.915  
2.898  
2.880  
2.494  
1.835  
1.763

S103

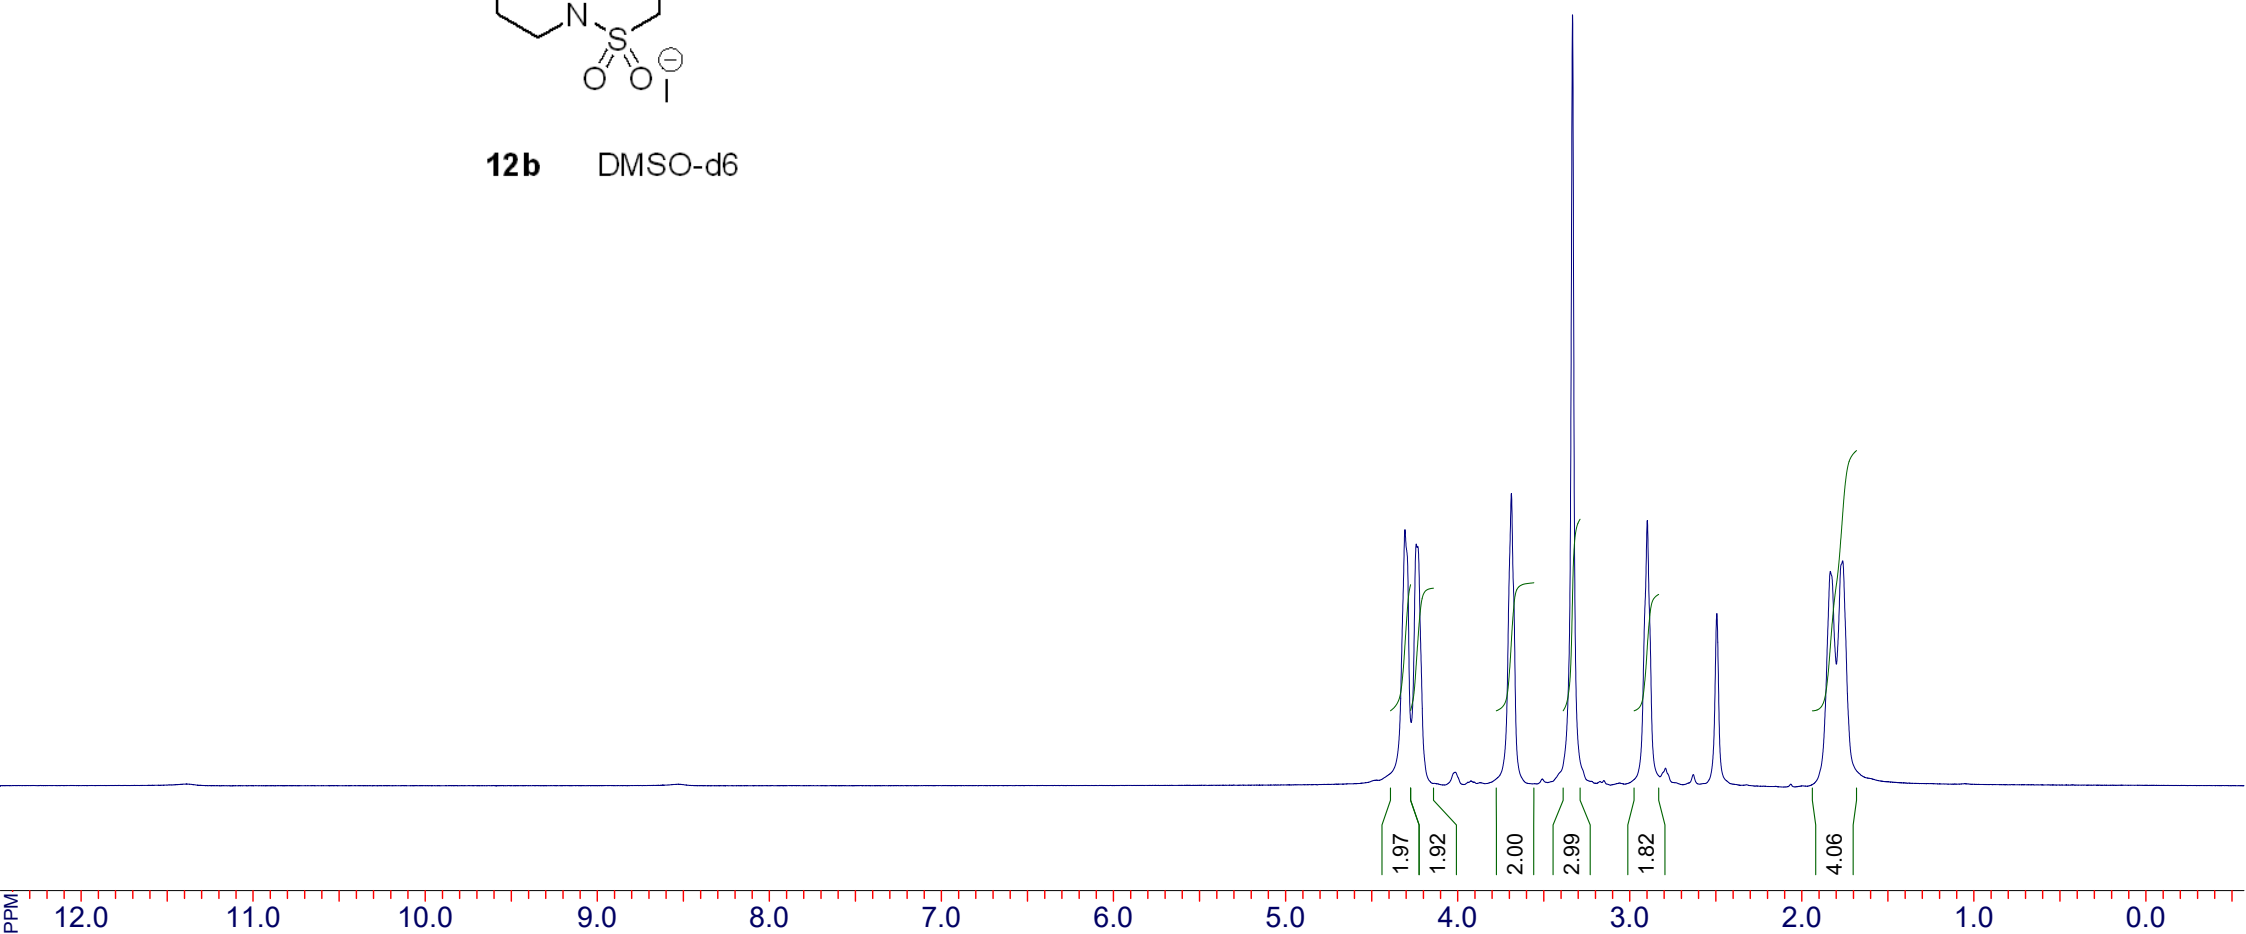

PPM

File name: lv33

Operator: nmr

SF: 400.1300 MHz

NSC: 1

PW: 0.00 usec, RG: 25

SI: 32768

Date: 30-May-2022

Solvent: DMSO

SW: 8224 Hz

TE: 300 K

AQ: 1.99 sec, RD: 0.00 sec

PPM

165.64

50.08

43.94

43.60

42.48

40.11

29.45

0.62

7.95

104

lv33\_C13

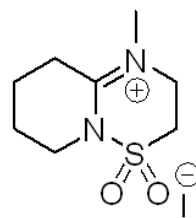**12b** DMSO-d6

PPM

200

180

160

140

120

100

80

60

40

20

0

File name: lv33\_C13

Operator: nmr

SF: 100.6128 MHz

NSC: 80

PW: 0.00 usec, RG: 2050

SI: 32768

Date: 30-May-2022

Solvent: DMSO

SW: 26042 Hz

TE: 300 K

AQ: 0.98 sec, RD: 0.00 sec

lv-23

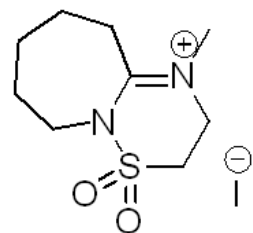**12c** DMSO-d6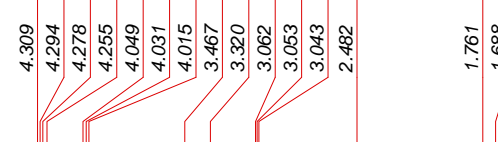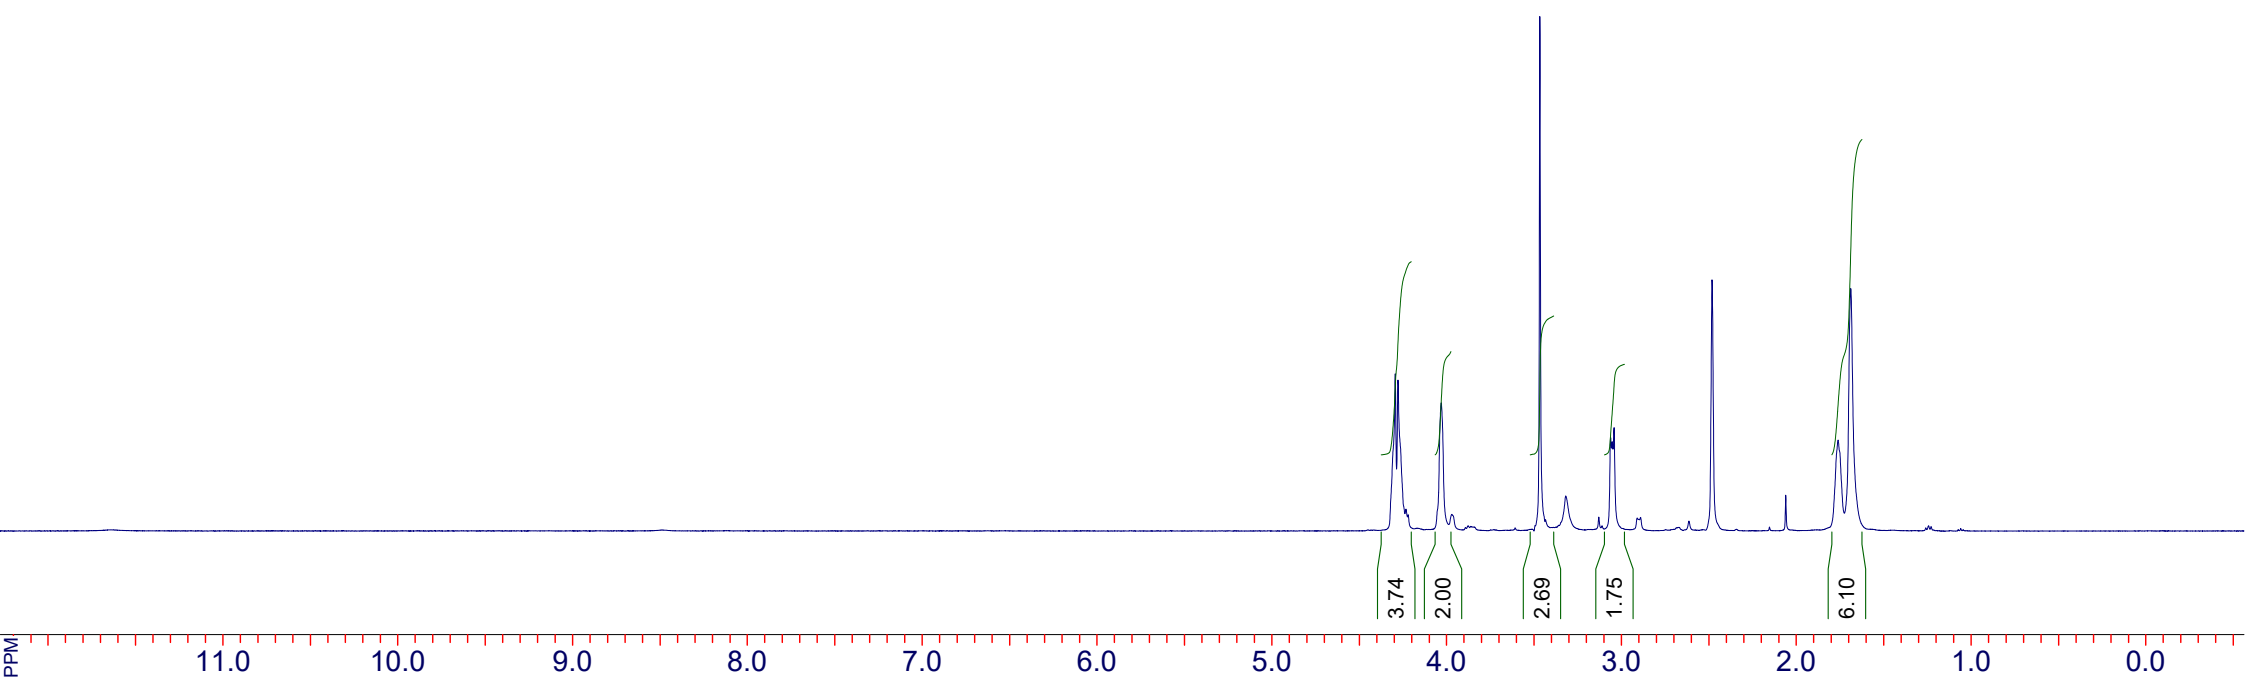

File name: lv-23

Operator: root

SF: 499.7730 MHz

NSC: 1

PW: 0.00 usec, RG: 22

SI: 32768

Date: 27-May-2022

Solvent: DMSO

SW: 10776 Hz

TE: 683 K

AQ: 1.52 sec, RD: 0.00 sec

PPM

169.62

49.80

44.15

43.94

43.79

39.60

30.44

26.92

26.85

21.58

\$106

lv-23\_C13

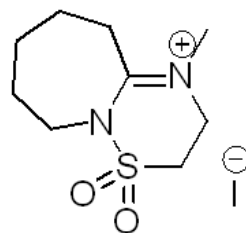**12c** DMSO-d6

PPM

240

220

200

180

160

140

120

100

80

60

40

20

0

File name: lv-23\_C13\_APT

Operator: root

SF: 125.6681 MHz

NSC: 250

PW: 0.00 usec, RG: 51200

SI: 131072

Date: 27-May-2022

Solvent: DMSO

SW: 32680 Hz

TE: 683 K

AQ: 0.78 sec, RD: 0.00 sec

PPM

169.57

49.77

44.12

43.89

43.77

39.58

30.40

26.86

26.78

0

107

lv-23\_C13\_APT

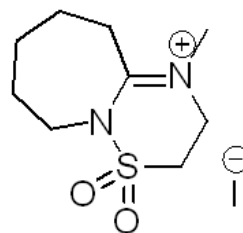**12c** DMSO-d6

PPM

200

180

160

140

120

100

80

60

40

20

0

File name: lv-23\_C13\_APT

Operator: root

SF: 125.6681 MHz

NSC: 338

PW: 0.00 usec, RG: 51200

SI: 65536

Date: 27-May-2022

Solvent: DMSO

SW: 32680 Hz

TE: 683 K

AQ: 1.57 sec, RD: 0.00 sec

PPM

lv-14

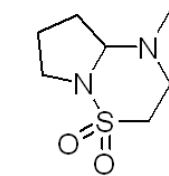

13a DMSO-d6

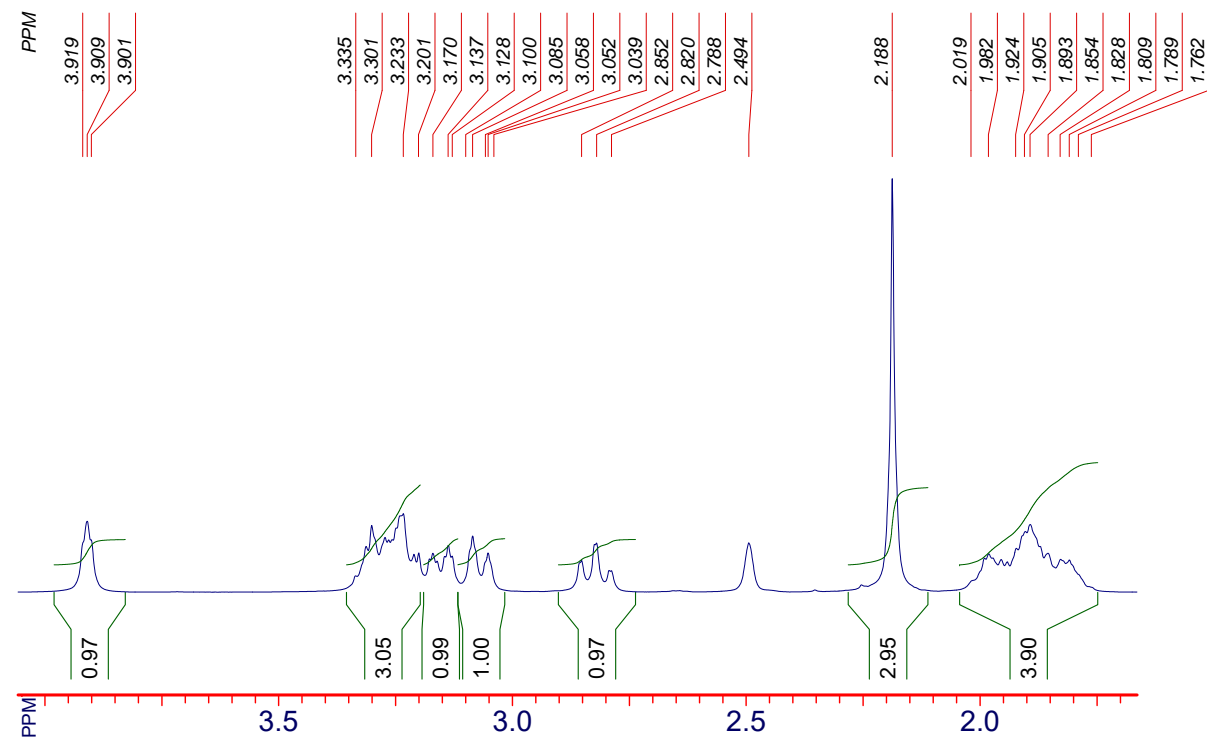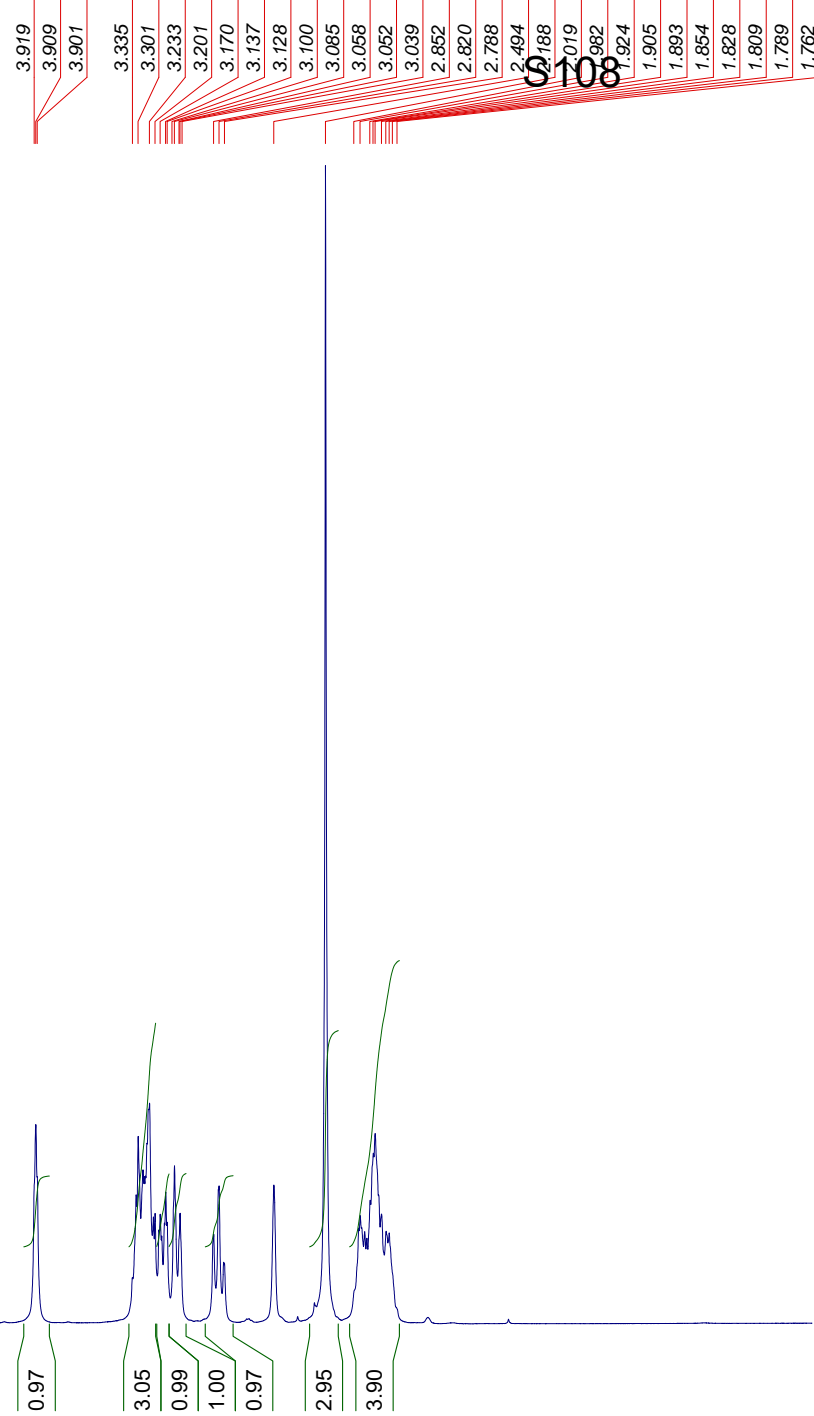

PPM

File name: lv-14

Operator: nmr

SF: 400.1300 MHz

NSC: 1

PW: 0.00 usec, RG: 25

SI: 32768

Date: 26-May-2022

Solvent: DMSO

SW: 8224 Hz

TE: 300 K

AQ: 1.99 sec, RD: 0.00 sec

PPM

lv-14\_C13

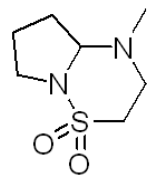**13a** DMSO-d6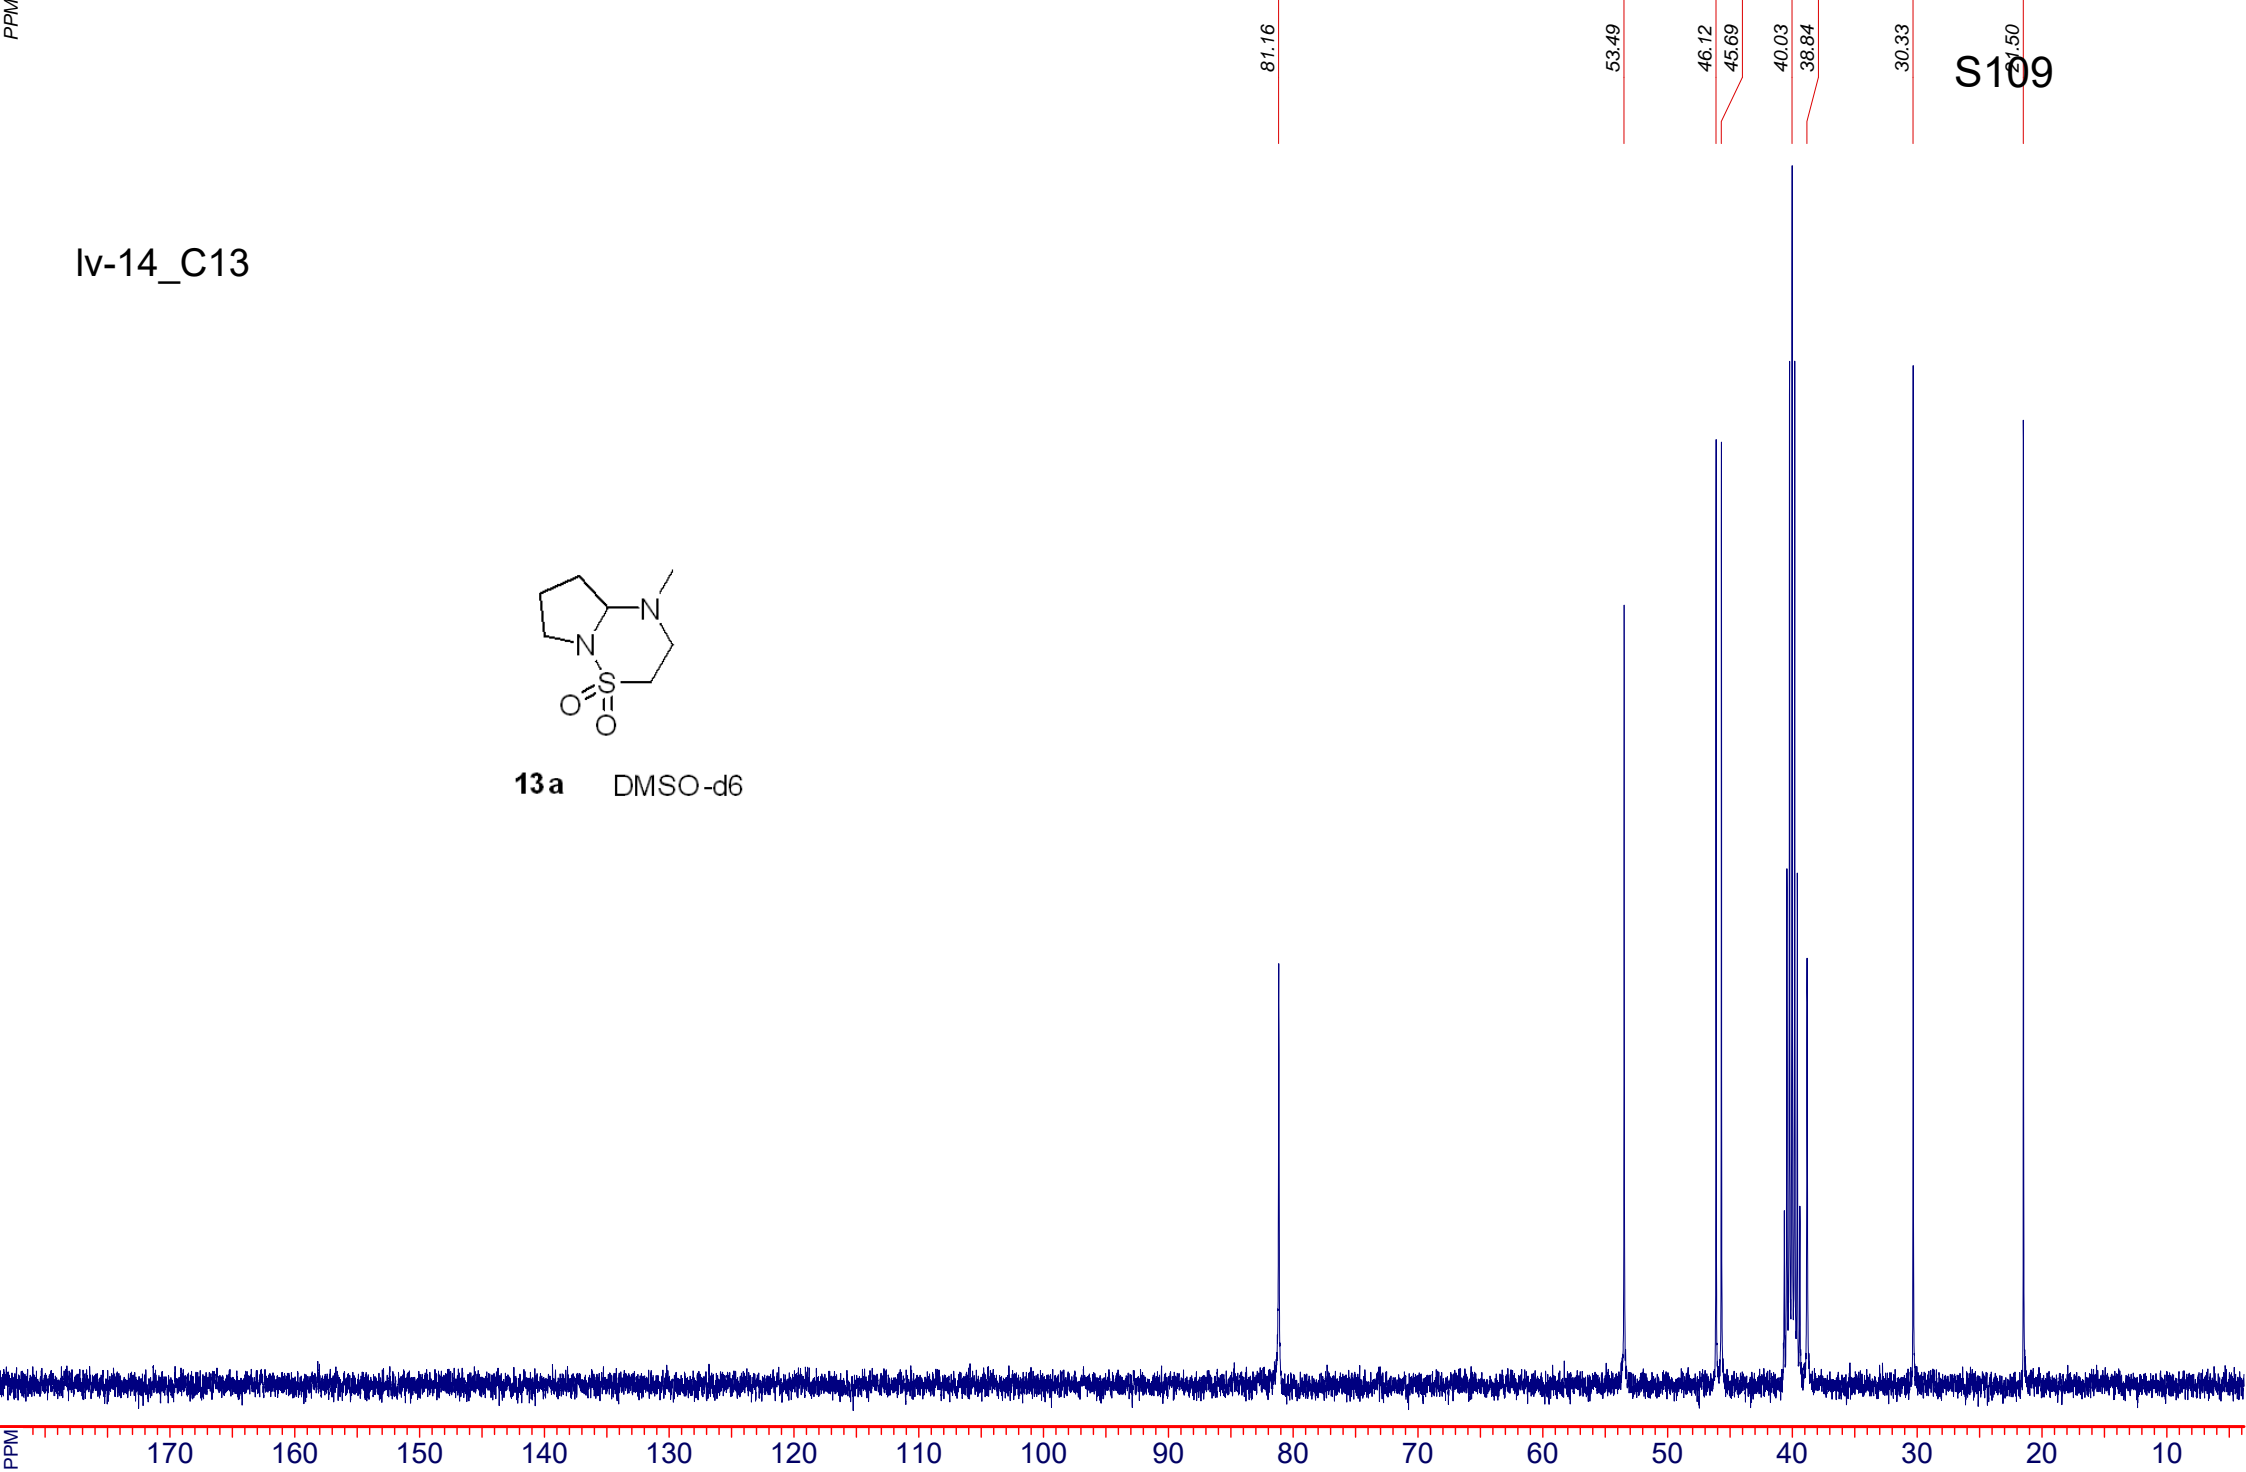

PPM

File name: lv-14\_C13

Operator: nmr

SF: 100.6128 MHz

NSC: 214

PW: 0.00 usec, RG: 2050

SI: 32768

Date: 26-May-2022

Solvent: DMSO

SW: 26042 Hz

TE: 300 K

AQ: 0.98 sec, RD: 0.00 sec

PPM

81.15

53.48

46.12

45.69

39.82

38.82

30.33

21.50

S110

lv-14\_C13APT

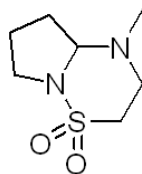**13a** DMSO-d6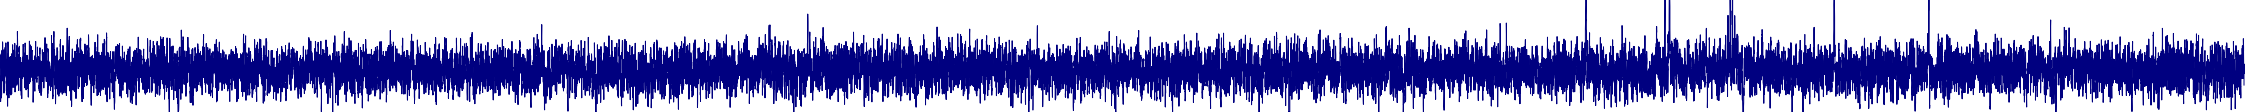

PPM 190 180 170 160 150 140 130 120 110 100 90 80 70 60 50 40 30 20 10 0

File name: lv-14\_C13APT

Operator: nmr

SF: 100.6128 MHz

NSC: 280

PW: 0.00 usec, RG: 2050

SI: 65536

Date: 26-May-2022

Solvent: DMSO

SW: 24038 Hz

TE: 300 K

AQ: 1.06 sec, RD: 0.00 sec



PPM

lv-25

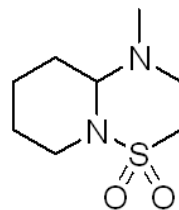**13b** DMSO-d6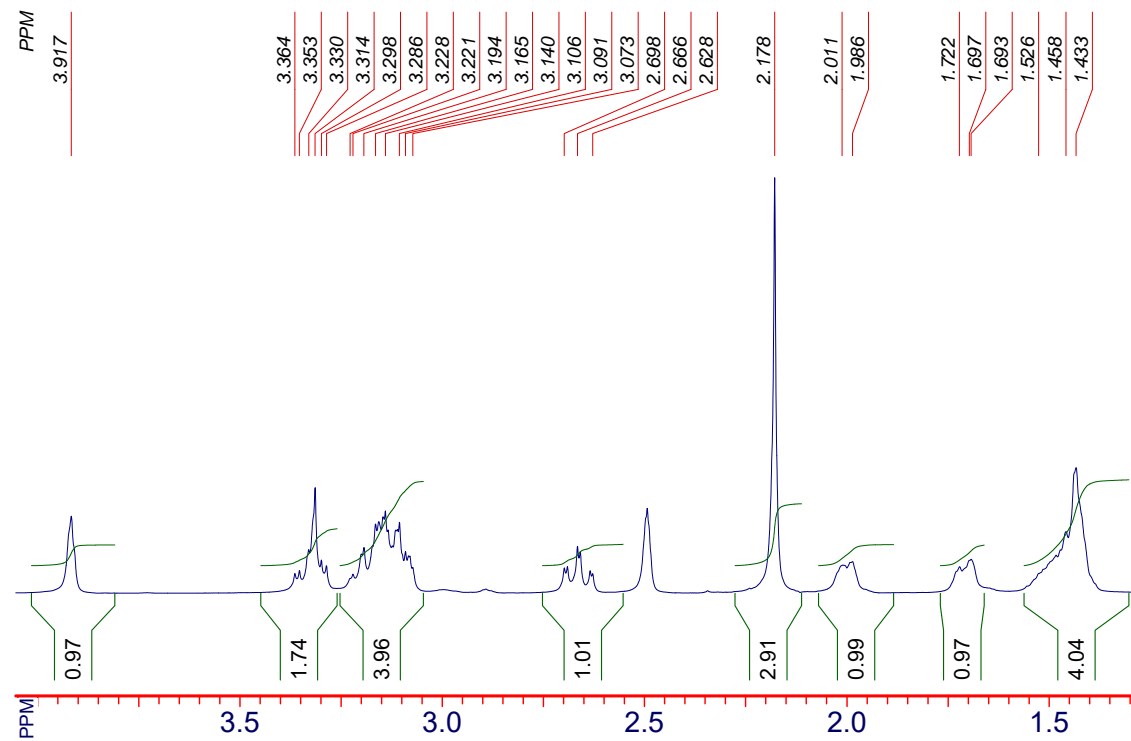

3.917

3.364  
3.353  
3.330  
3.314  
3.298  
3.286  
3.228  
3.221  
3.194  
3.165  
3.140  
3.106  
3.091  
3.073  
2.698  
2.666  
2.628  
2.178  
2.011  
1.986  
1.722  
1.697  
1.693  
1.526  
1.458  
1.433

PPM

3.5

3.0

2.5

2.0

1.5

PPM

12.0

11.0

10.0

9.0

8.0

7.0

6.0

4.0

3.0

2.0

1.0

0.0

File name: lv-25

Operator: nmr

SF: 400.1300 MHz

NSC: 1

PW: 0.00 usec, RG: 25

SI: 32768

Date: 30-May-2022

Solvent: DMSO

SW: 8224 Hz

TE: 300 K

AQ: 1.99 sec, RD: 0.00 sec

PPM

lv-25\_C13.fid

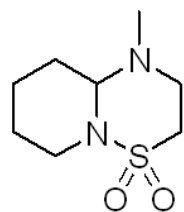**13b** DMSO-d6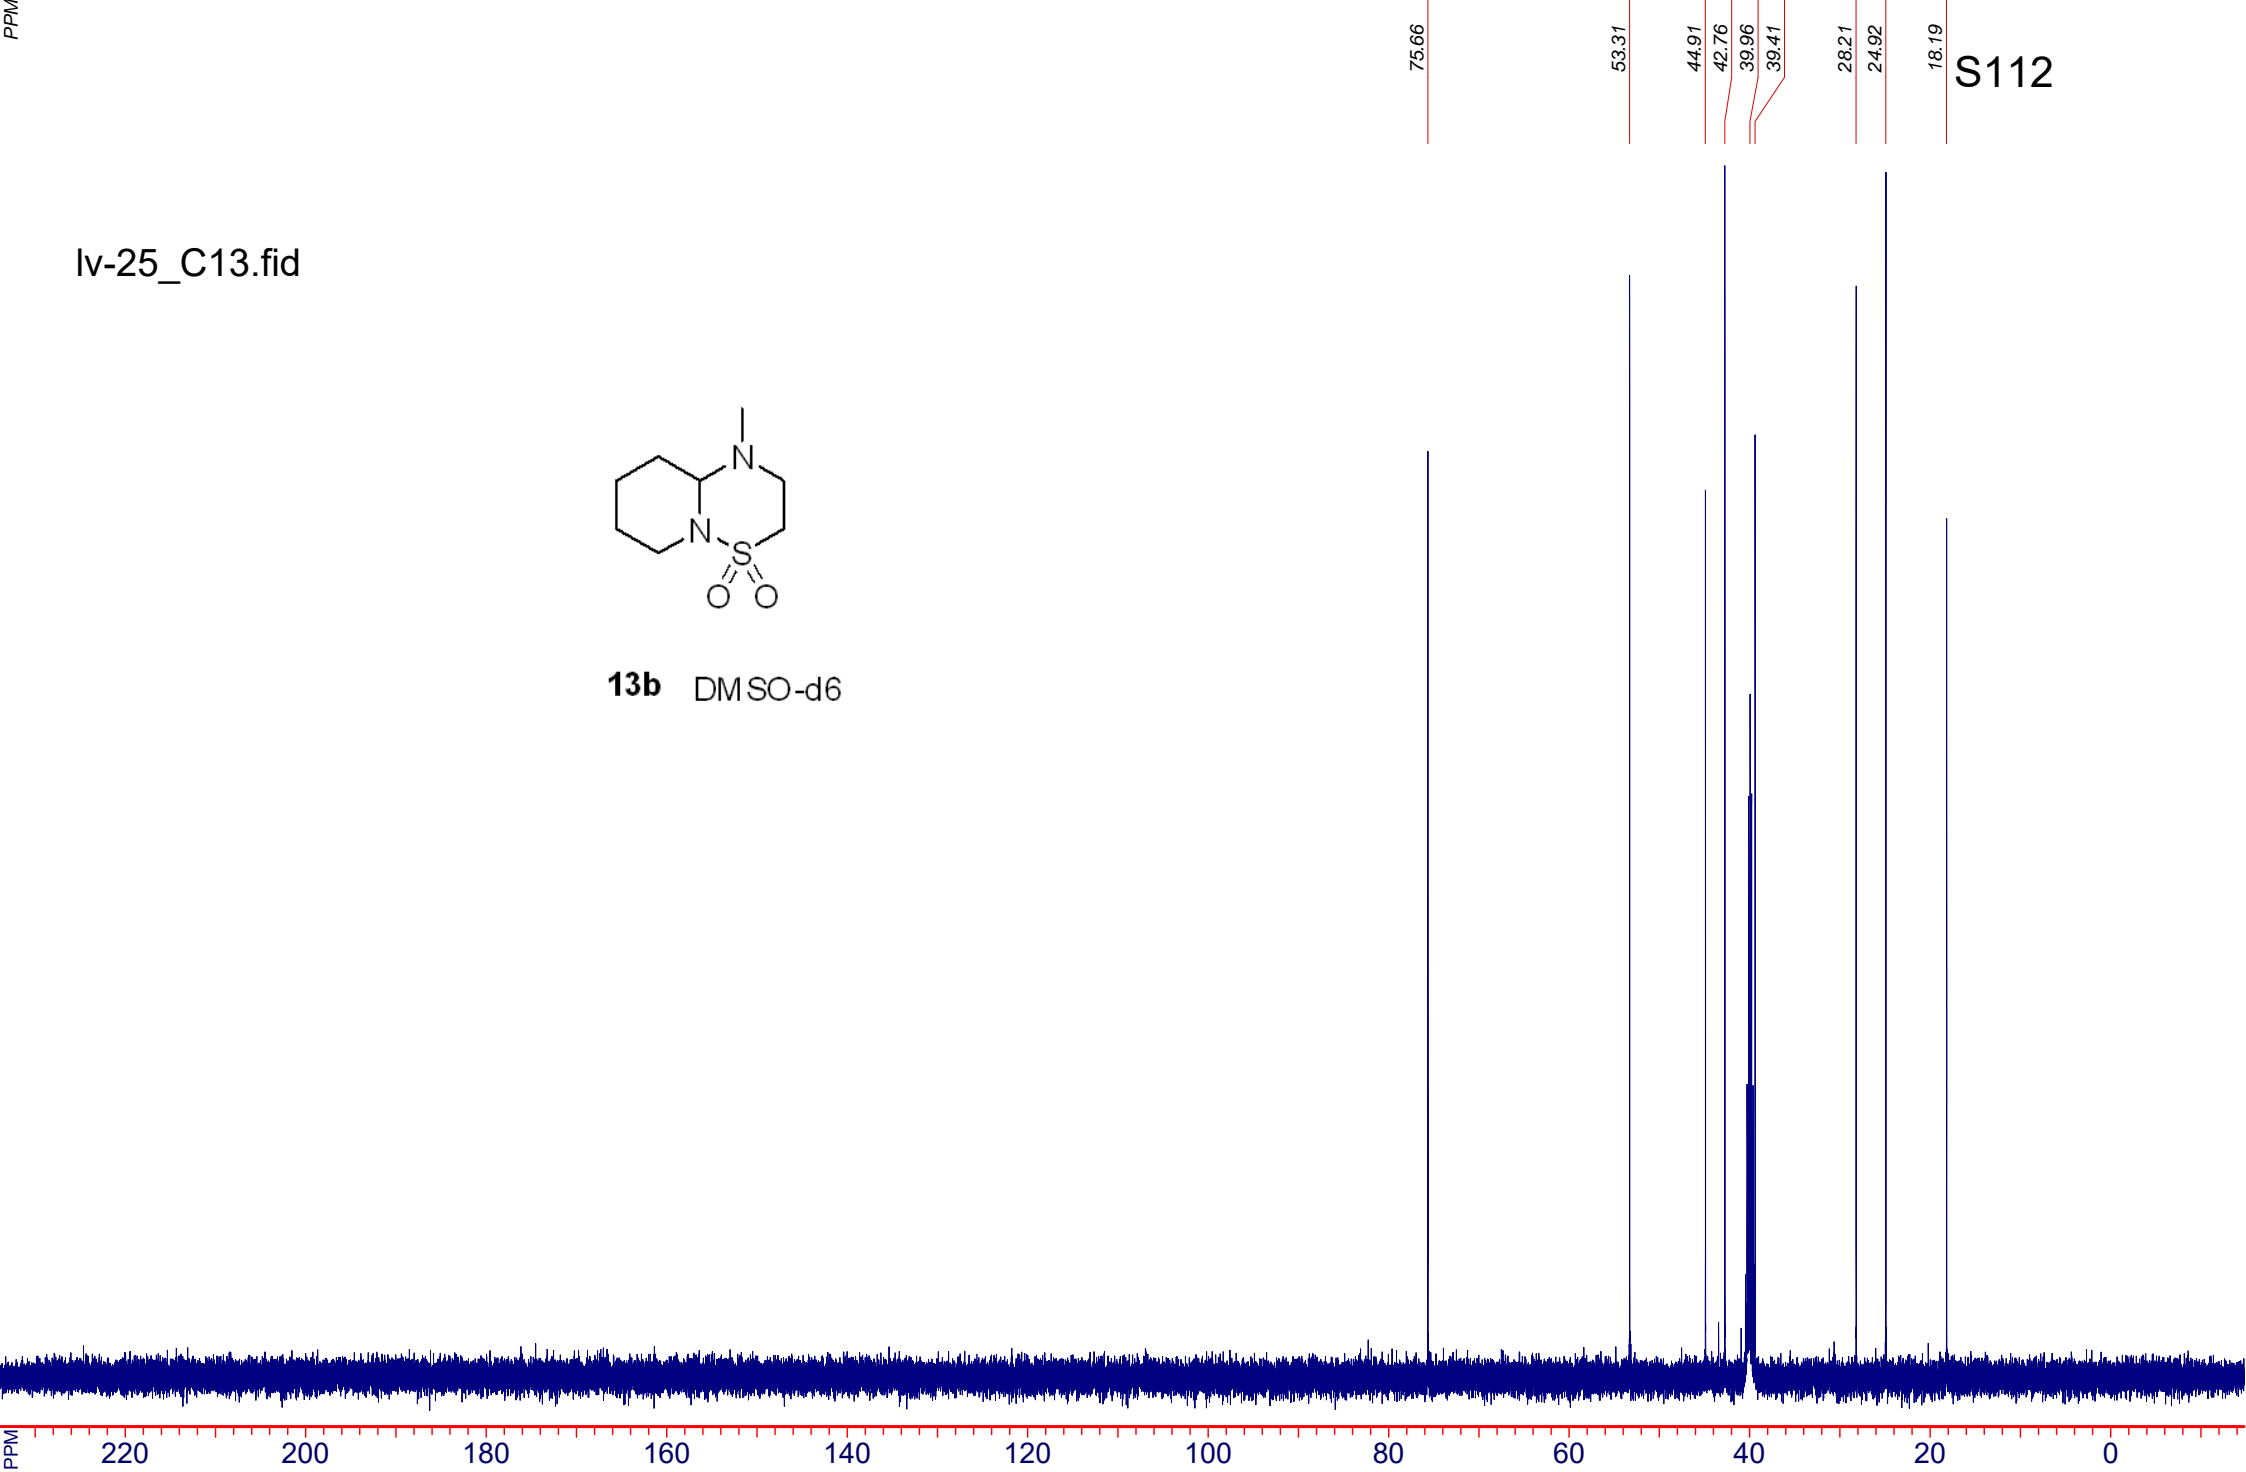

75.66

53.31

44.91

42.76

39.96

39.41

28.21

24.92

18.19

S112

PPM

220

200

180

160

140

120

100

80

60

40

20

0

File name: lv-25\_C13.fid

Operator:

SF: 125.6926 MHz

NSC: 0

PW: 3.27 usec, RG: 60

SI: 65536

Date: 31-May-2022

Solvent: dms0

SW: 31250 Hz

TE: 298 K

AQ: 1.05 sec, RD: 0.00 sec

PPM

lv-25\_APTC13.fid

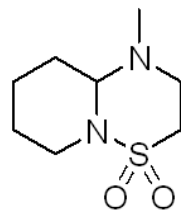**13b** DMSO-d6

75.66

53.31

44.91

42.76

39.97

39.40

28.21

24.92

18.19

S113

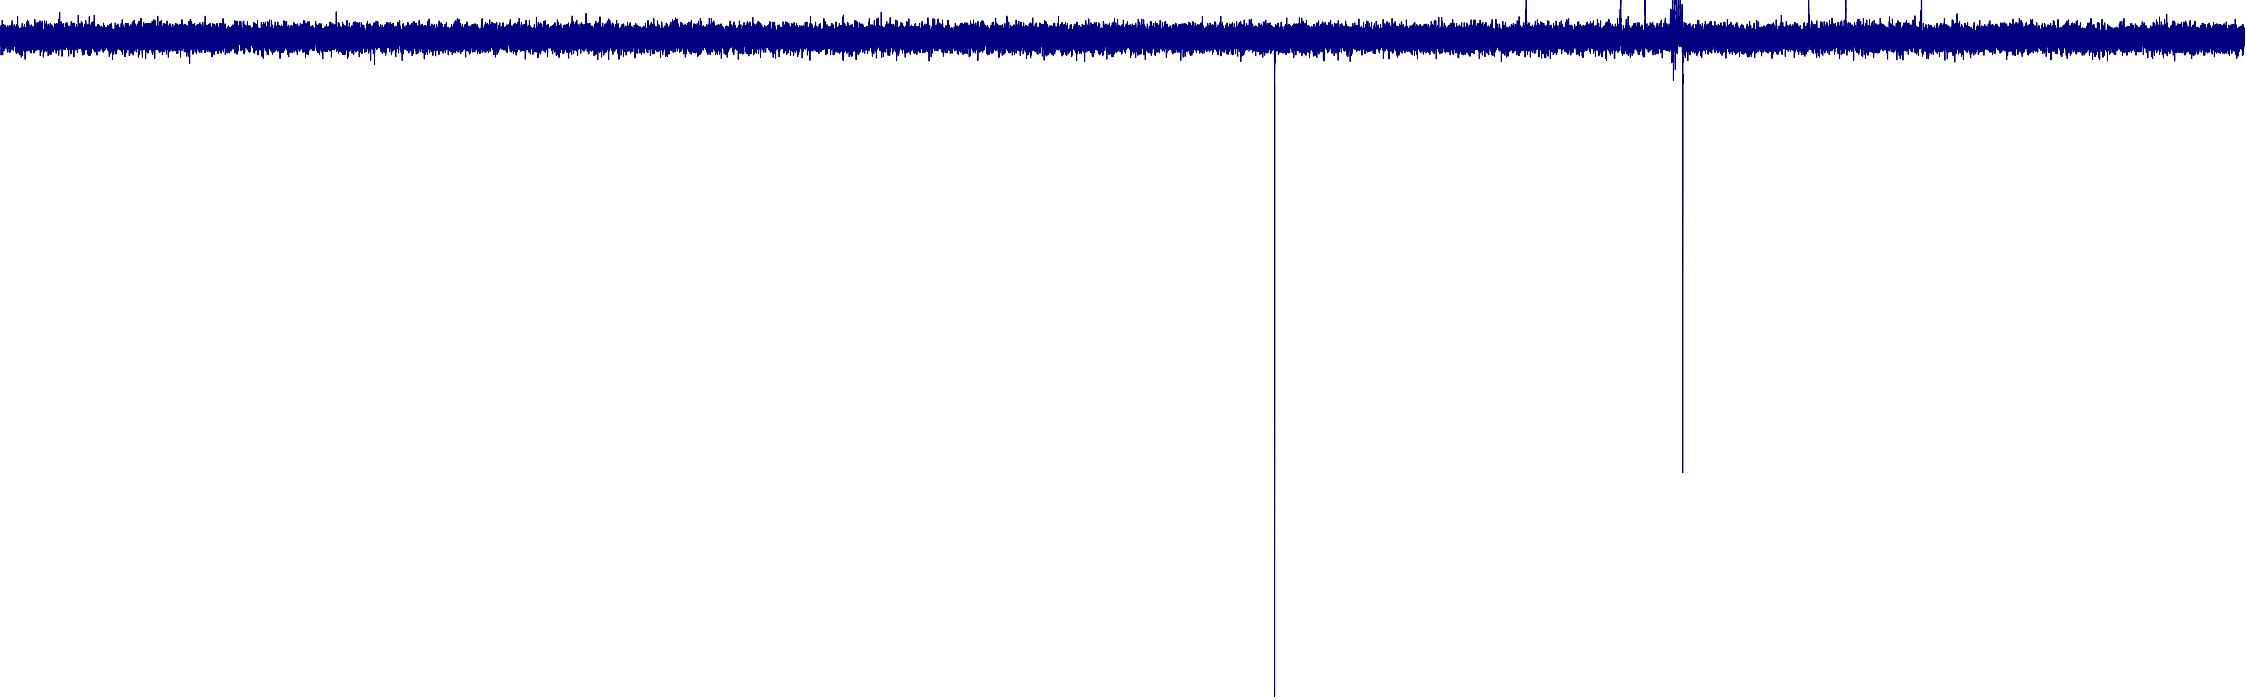

PPM

180 170 160 150 140 130 120 110 100 90 80 70 60 50 40 30 20 10 0

File name: lv-25\_APTC13.fid

Operator:

SF: 125.6925 MHz

NSC: 0

PW: 5.00 usec, RG: 60

SI: 131072

Date: 31-May-2022

Solvent: dms0

SW: 32895 Hz

TE: 298 K

AQ: 1.95 sec, RD: 0.00 sec

Automated Probe tuning parameter

lv-26

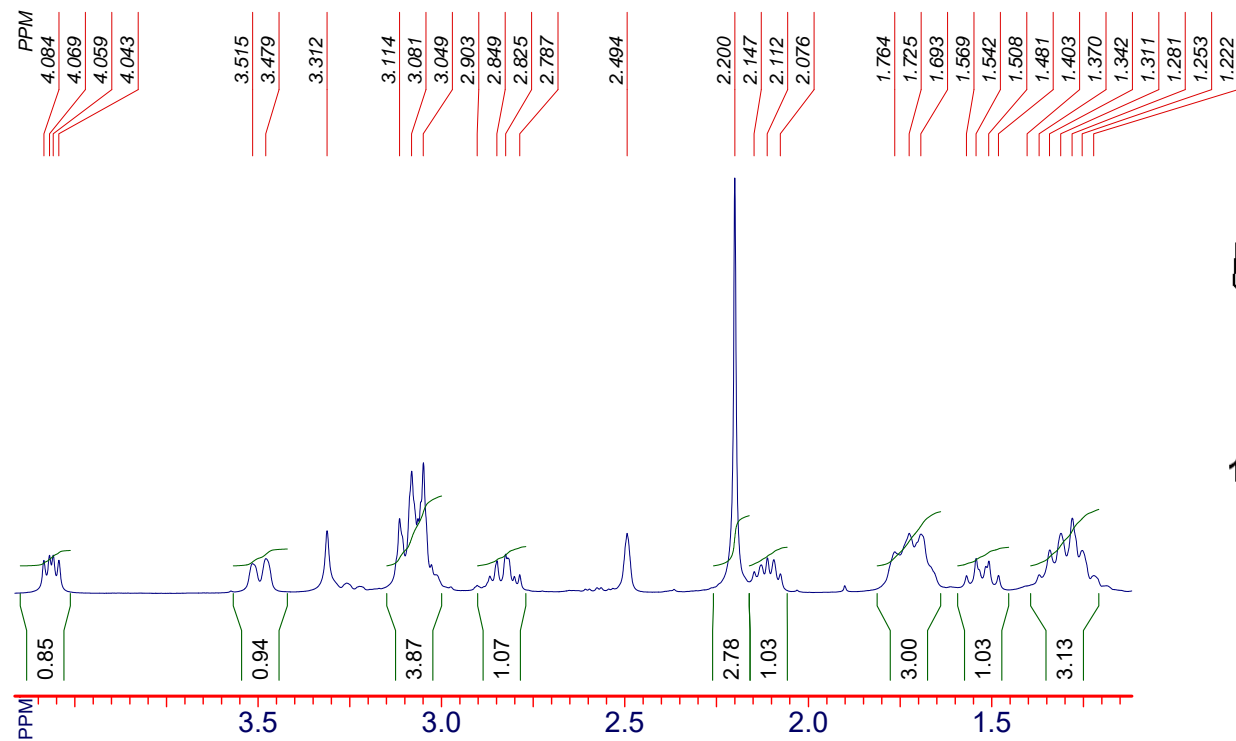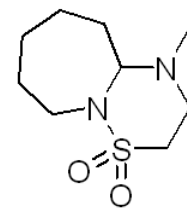

13c DMSO-d6

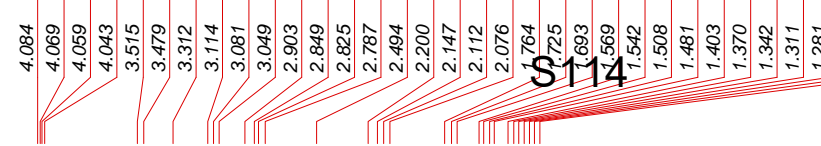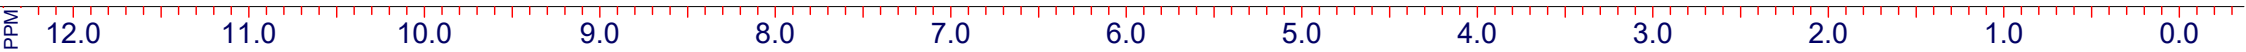

File name: lv-26

Operator: nmr

SF: 400.1300 MHz

NSC: 1

PW: 0.00 usec, RG: 25

SI: 32768

Date: 27-May-2022

Solvent: DMSO

SW: 8224 Hz

TE: 300 K

AQ: 1.99 sec, RD: 0.00 sec

PPM

78.09

52.95

45.79

43.29

39.56

37.41

32.35

30.90

29.05

27.75

S115

lv-26\_C13

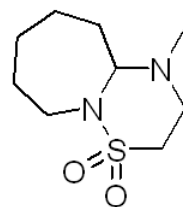**13c** DMSO-d6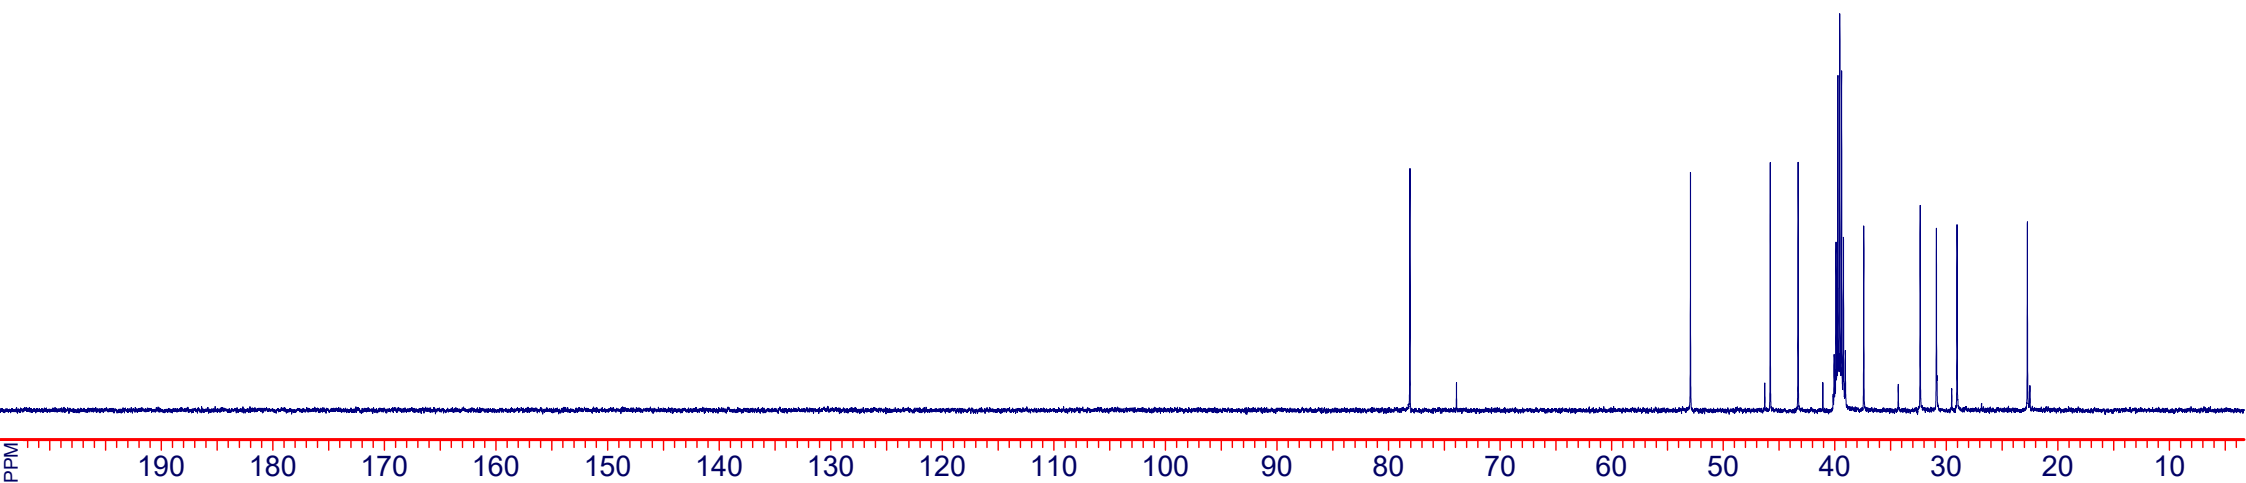

File name: lv-26\_C13

Operator: root

SF: 125.6681 MHz

NSC: 400

PW: 0.00 usec, RG: 51200

SI: 131072

Date: 28-May-2022

Solvent: DMSO

SW: 32680 Hz

TE: 683 K

AQ: 0.78 sec, RD: 0.00 sec

PPM

lv-26\_C13APT

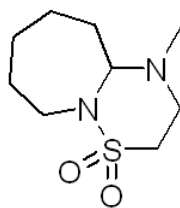**13c** DMSO-d6

78.04

52.89

45.74

43.24

39.53

37.34

32.29

30.84

28.98

22.70

S116

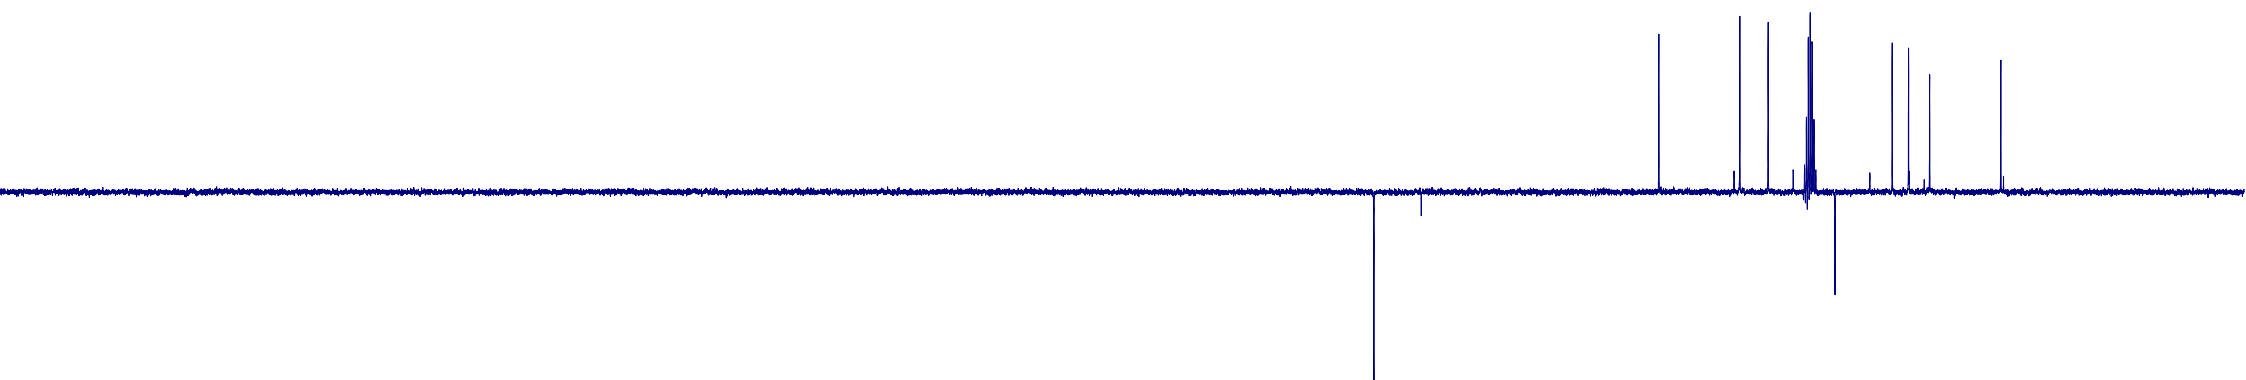

PPM 190 180 170 160 150 140 130 120 110 100 90 80 70 60 50 40 30 20 10

File name: lv-26\_C13APT

Operator: root

SF: 125.6681 MHz

NSC: 250

PW: 0.00 usec, RG: 51200

SI: 65536

Date: 28-May-2022

Solvent: DMSO

SW: 32680 Hz

TE: 683 K

AQ: 1.00 sec, RD: 0.00 sec

lv-29-1

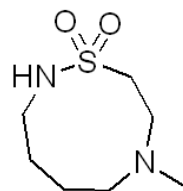**14a** DMSO-d6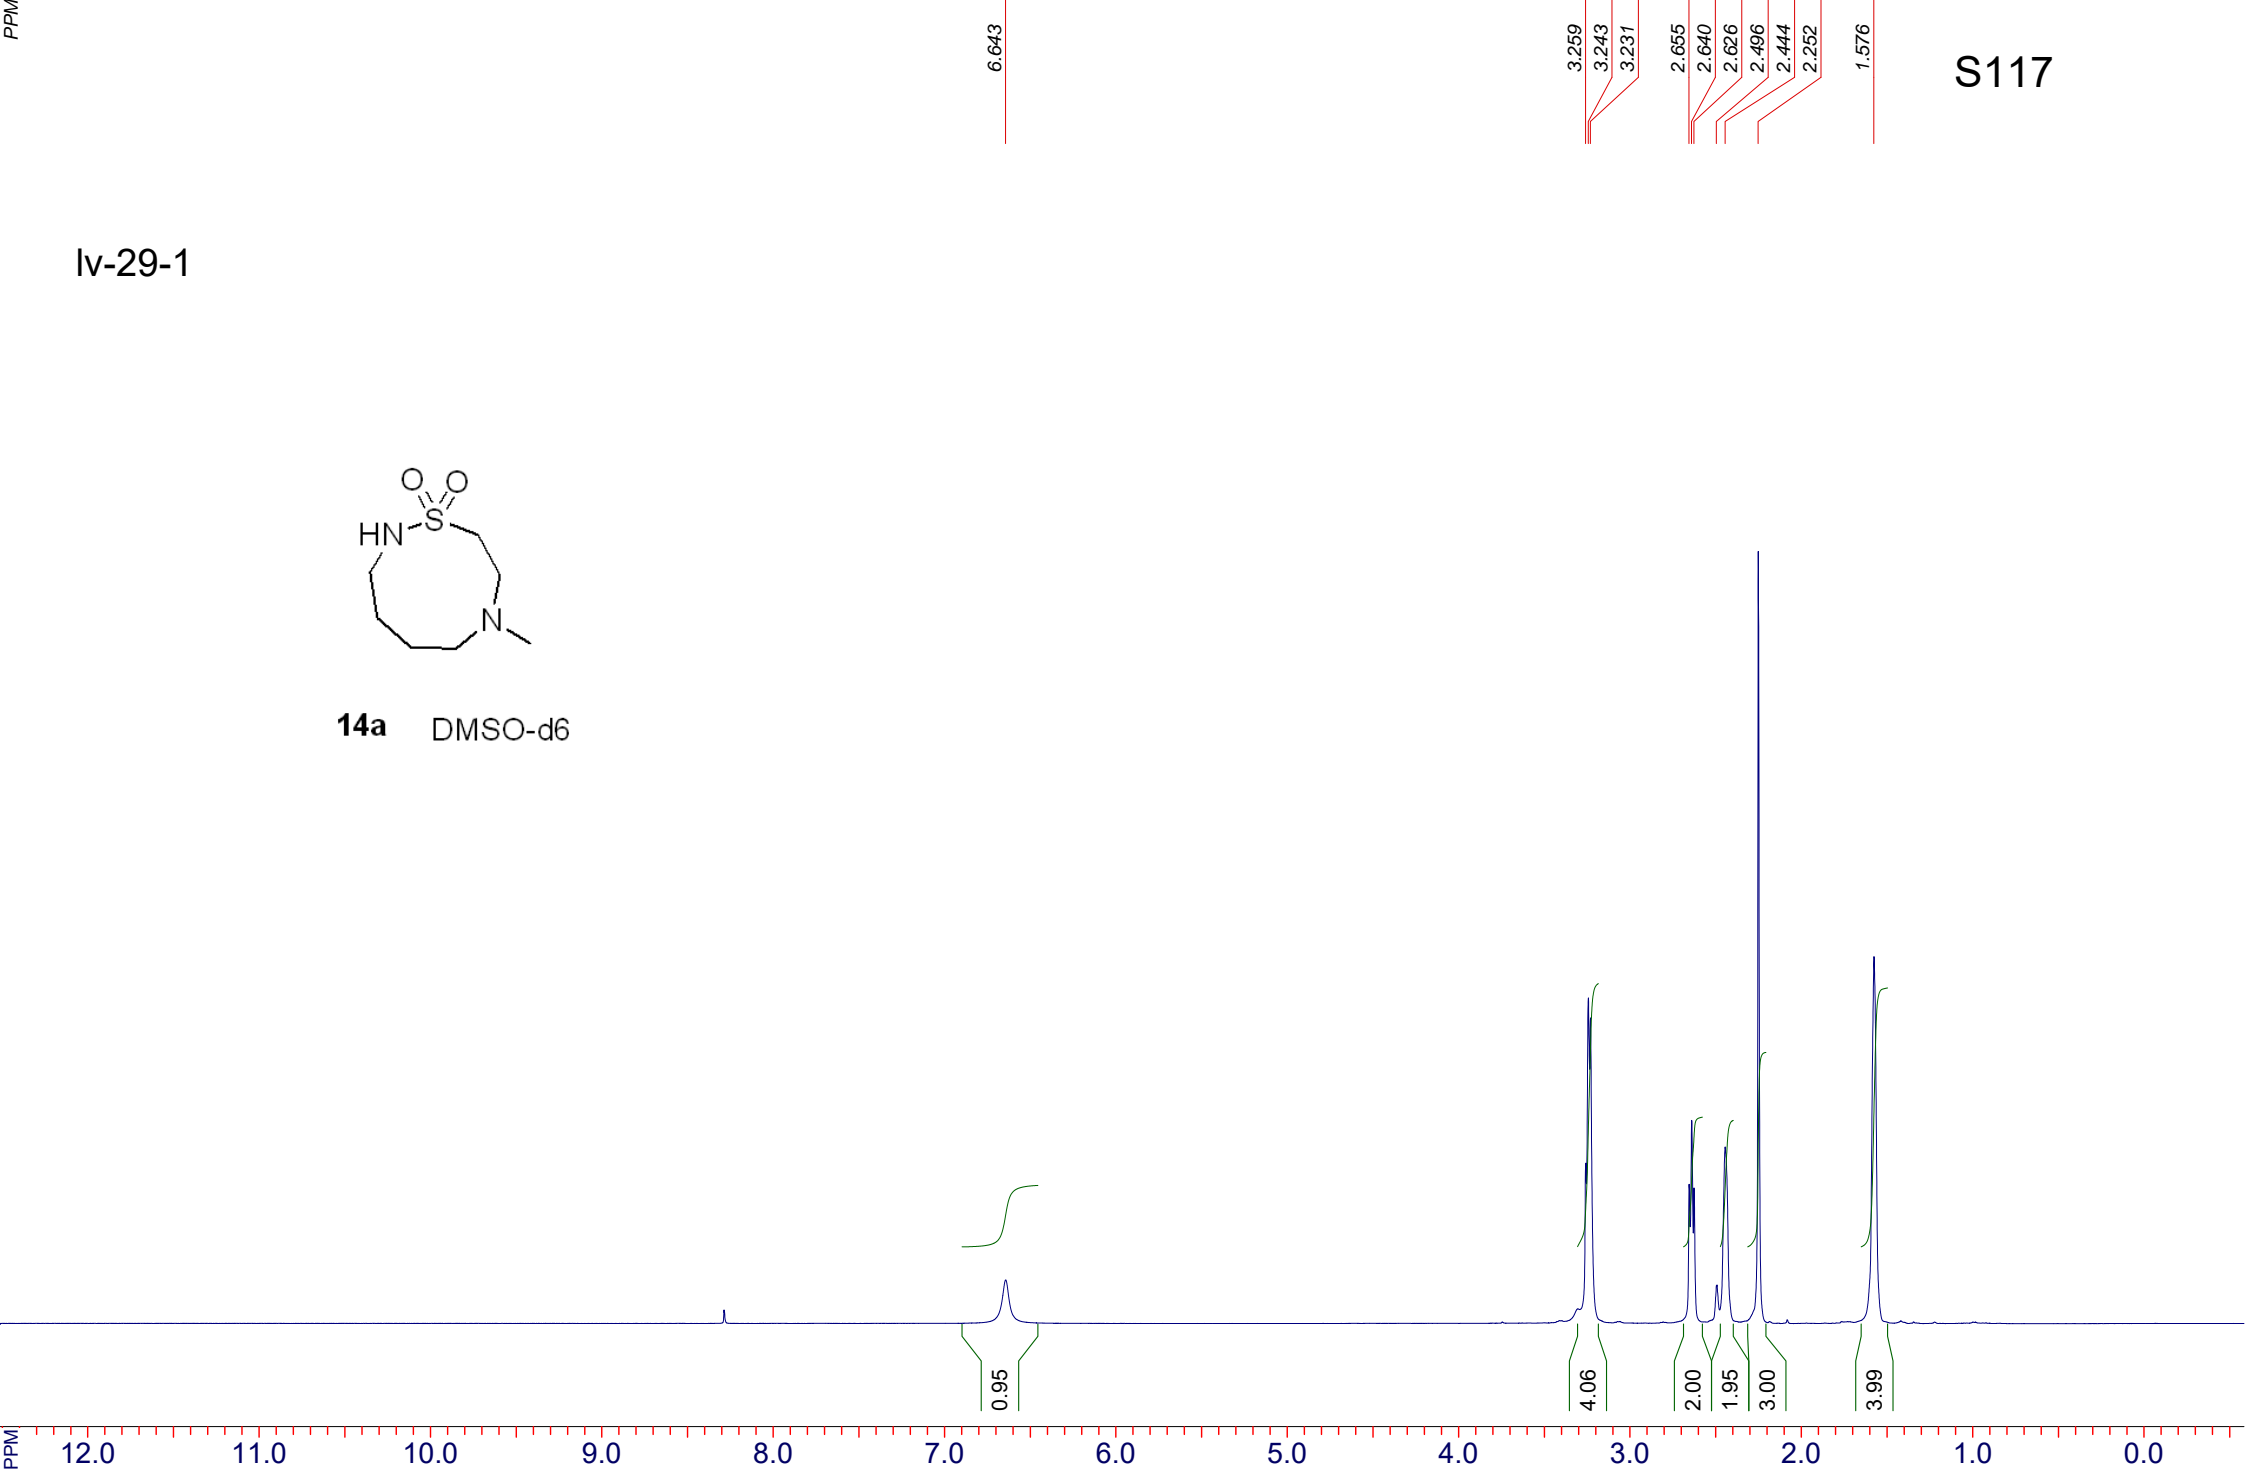

File name: lv-29-1

Operator: nmr

SF: 400.1300 MHz

NSC: 1

PW: 0.00 usec, RG: 25

SI: 32768

Date: 27-May-2022

Solvent: DMSO

SW: 8224 Hz

TE: 300 K

AQ: 1.99 sec, RD: 0.00 sec

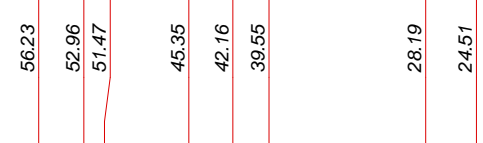

S118

lv-29-1\_C13

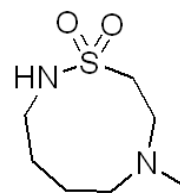**14a** DMSO-d6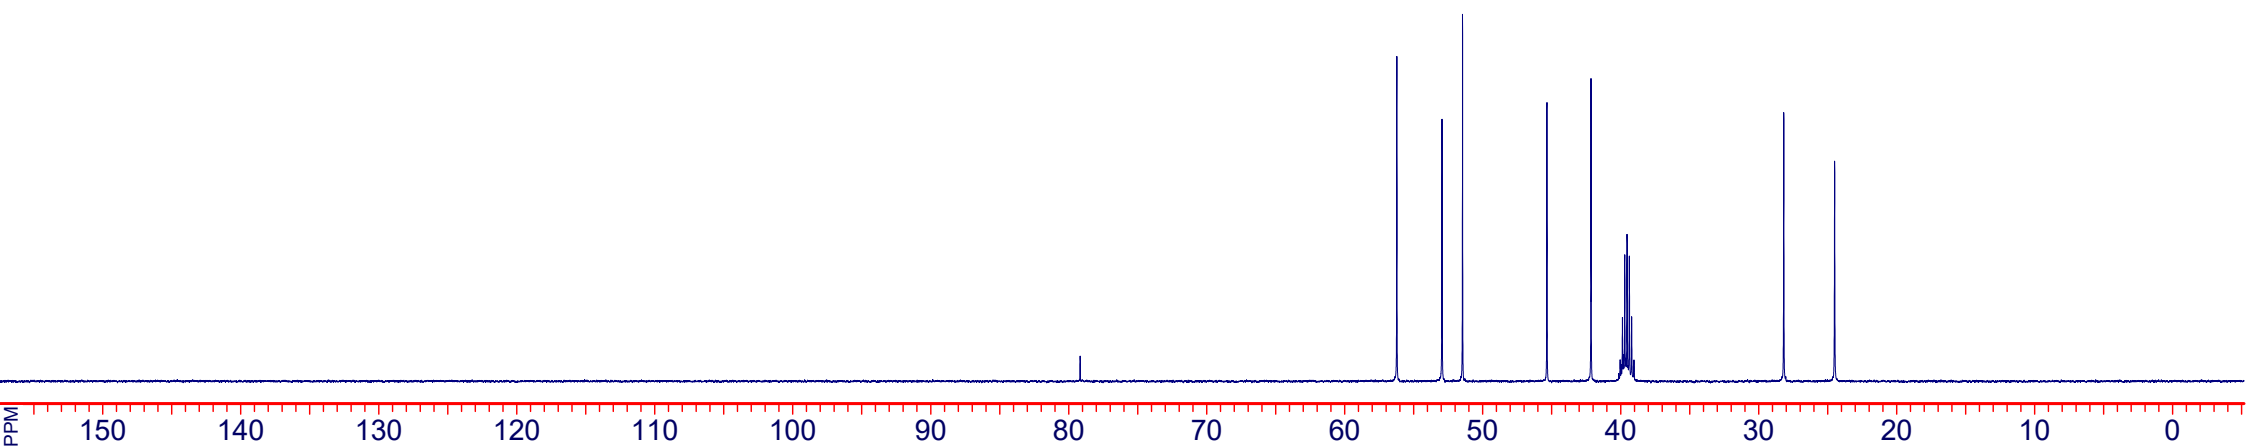

File name: lv-29-1\_C13

Operator: root

SF: 125.6681 MHz

NSC: 400

PW: 0.00 usec, RG: 51200

SI: 131072

Date: 28-May-2022

Solvent: DMSO

SW: 32680 Hz

TE: 683 K

AQ: 0.78 sec, RD: 0.00 sec



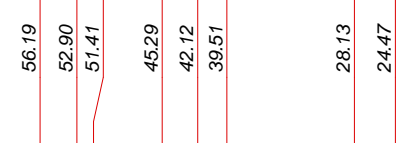

S119

lv-29-1\_C13APT

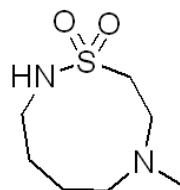**14a** DMSO-d6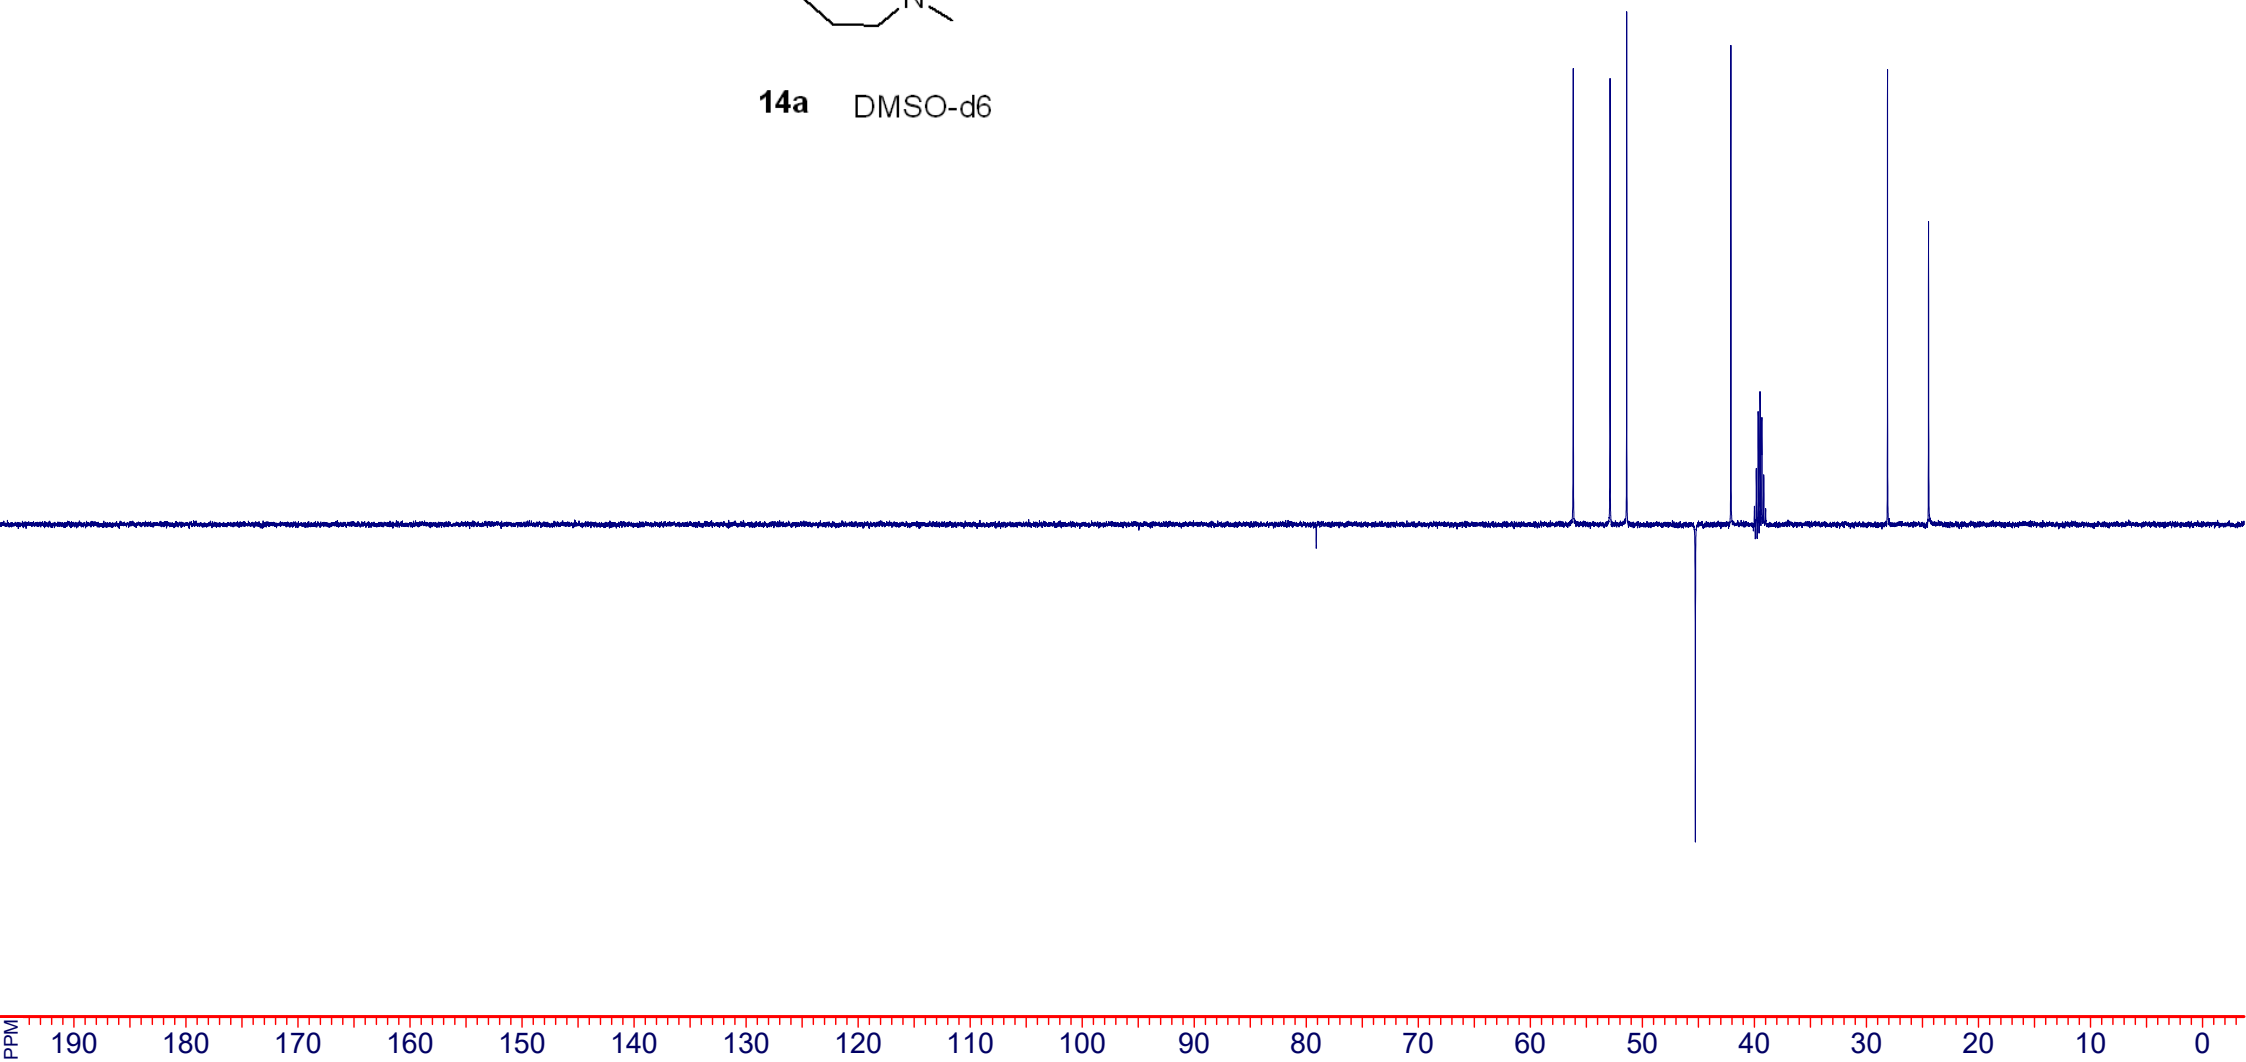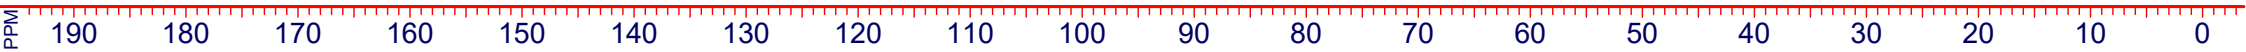

File name: lv-29-1\_C13APT

Operator: root

SF: 125.6681 MHz

NSC: 300

PW: 0.00 usec, RG: 51200

SI: 65536

Date: 28-May-2022

Solvent: DMSO

SW: 32680 Hz

TE: 683 K

AQ: 1.00 sec, RD: 0.00 sec

lv-30

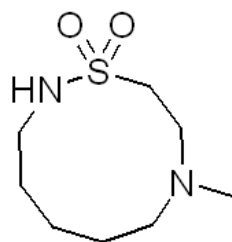**14b** DMSO-d6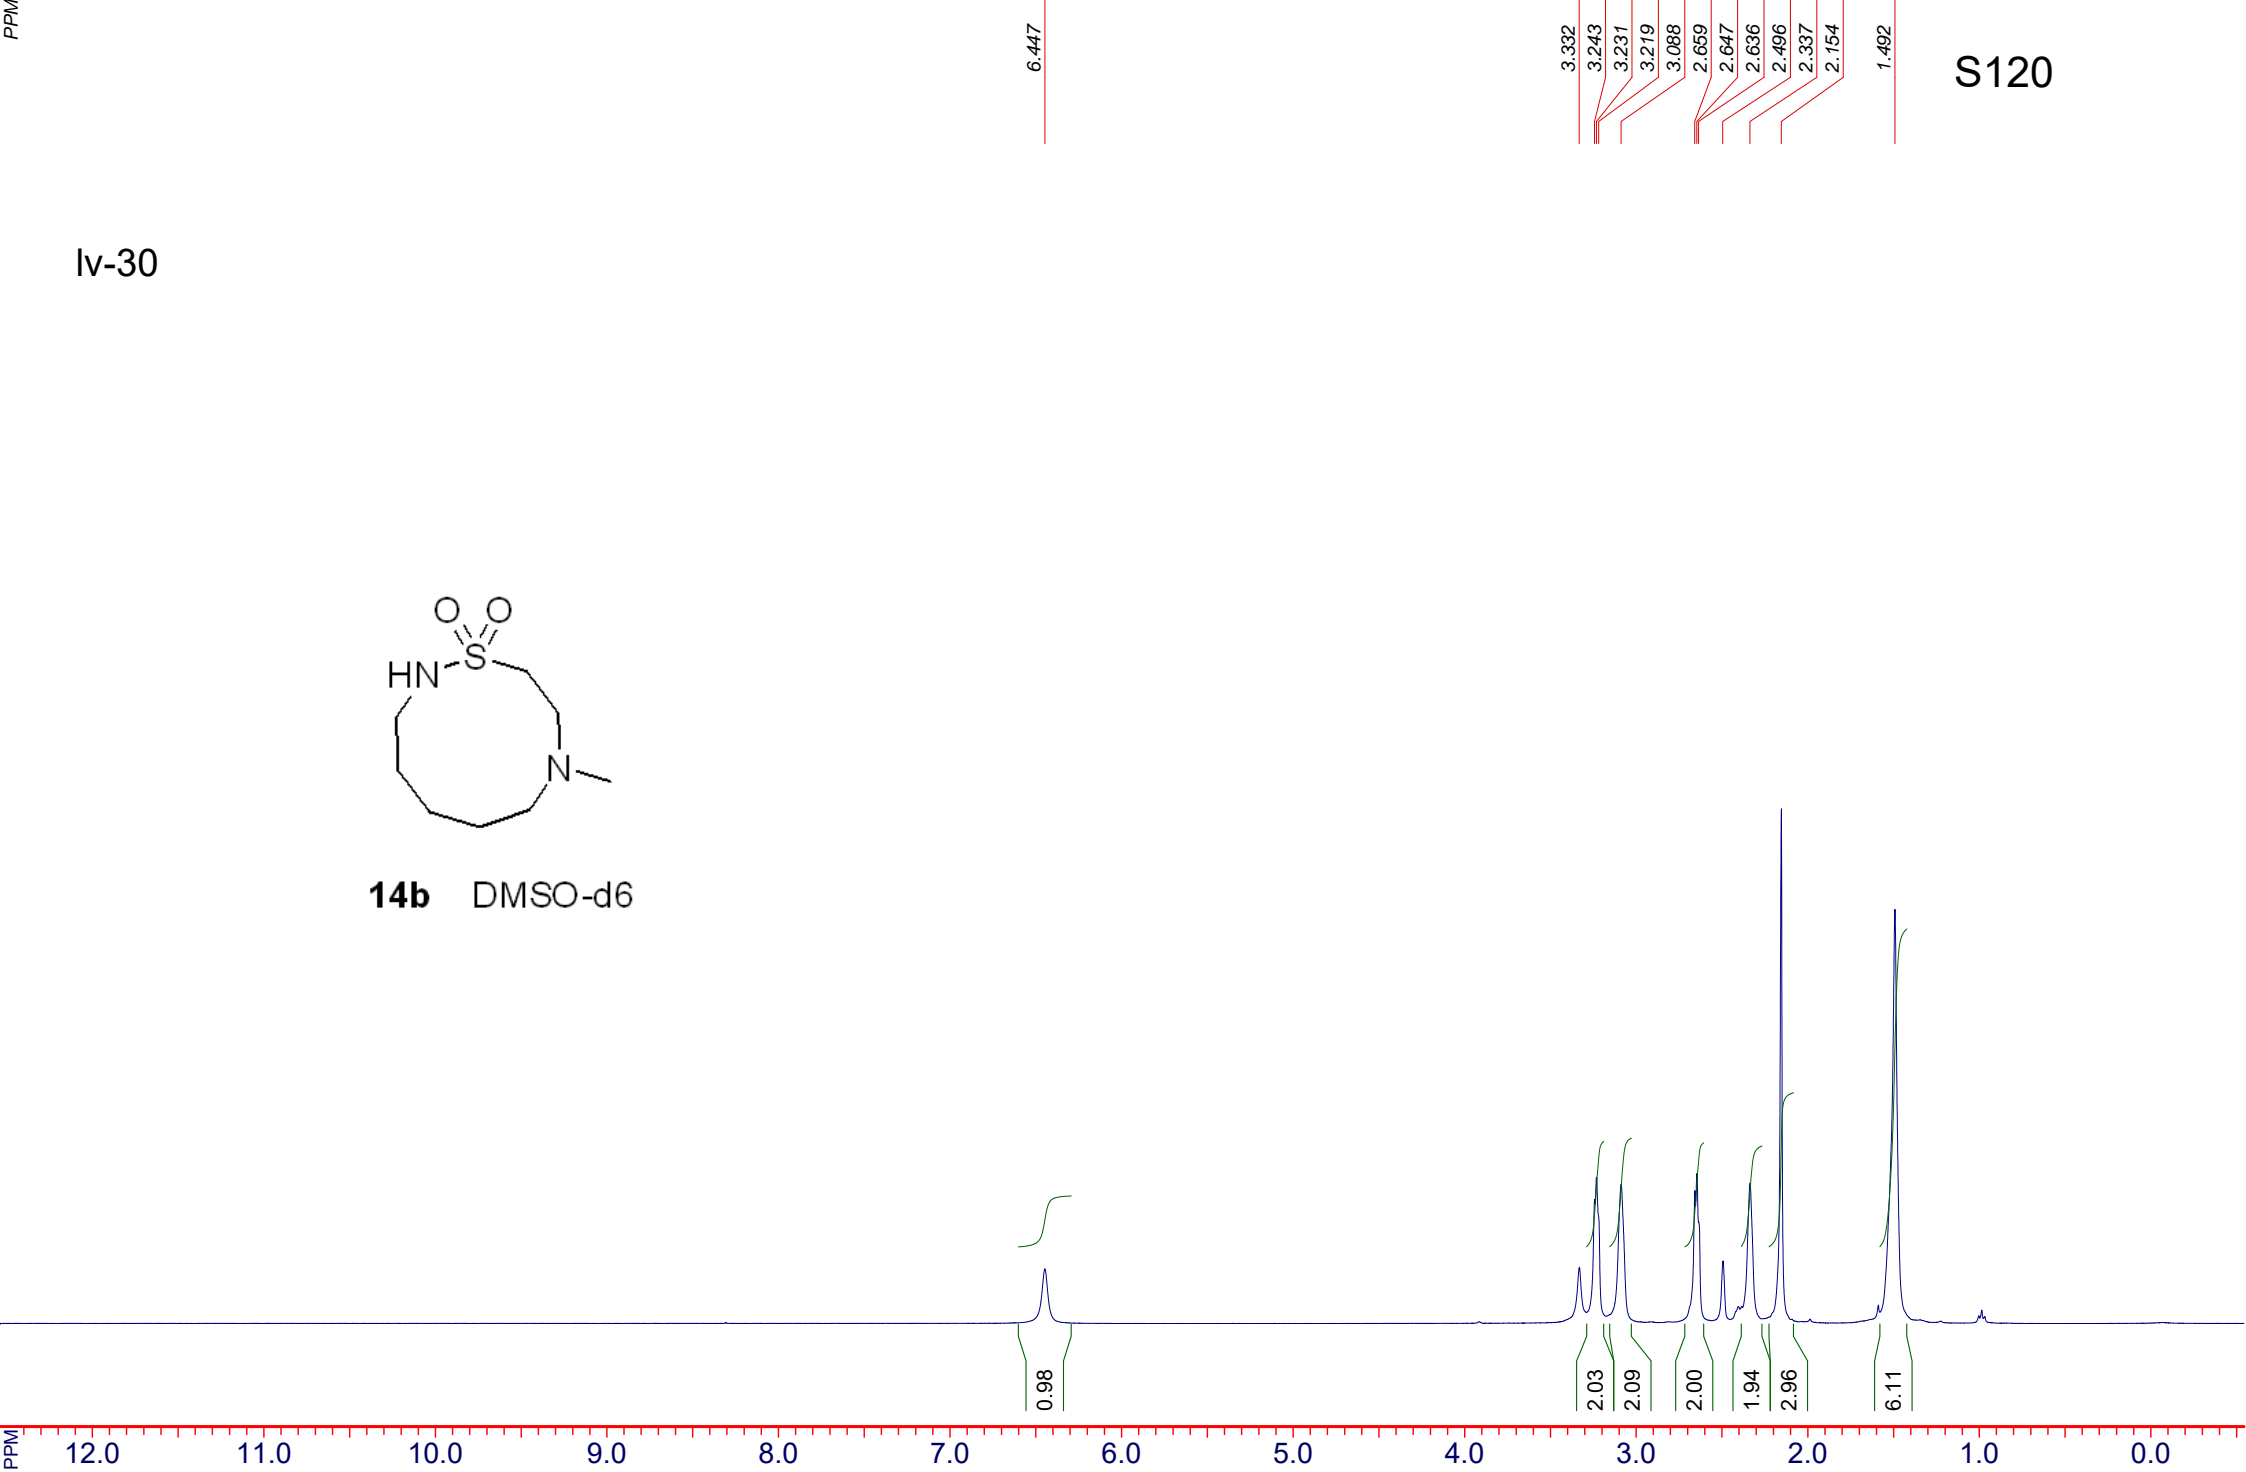

S120

File name: lv-30

Operator: nmr

SF: 400.1300 MHz

NSC: 1

PW: 0.00 usec, RG: 25

SI: 32768

Date: 30-May-2022

Solvent: DMSO

SW: 8224 Hz

TE: 300 K

AQ: 1.99 sec, RD: 0.00 sec

52.66  
52.52  
49.30  
42.94  
42.05  
39.96  
26.41  
25.33  
20.66  
121

lv-30\_C13.fid

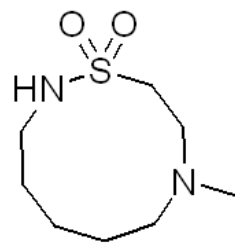

**14b** DMSO-d6

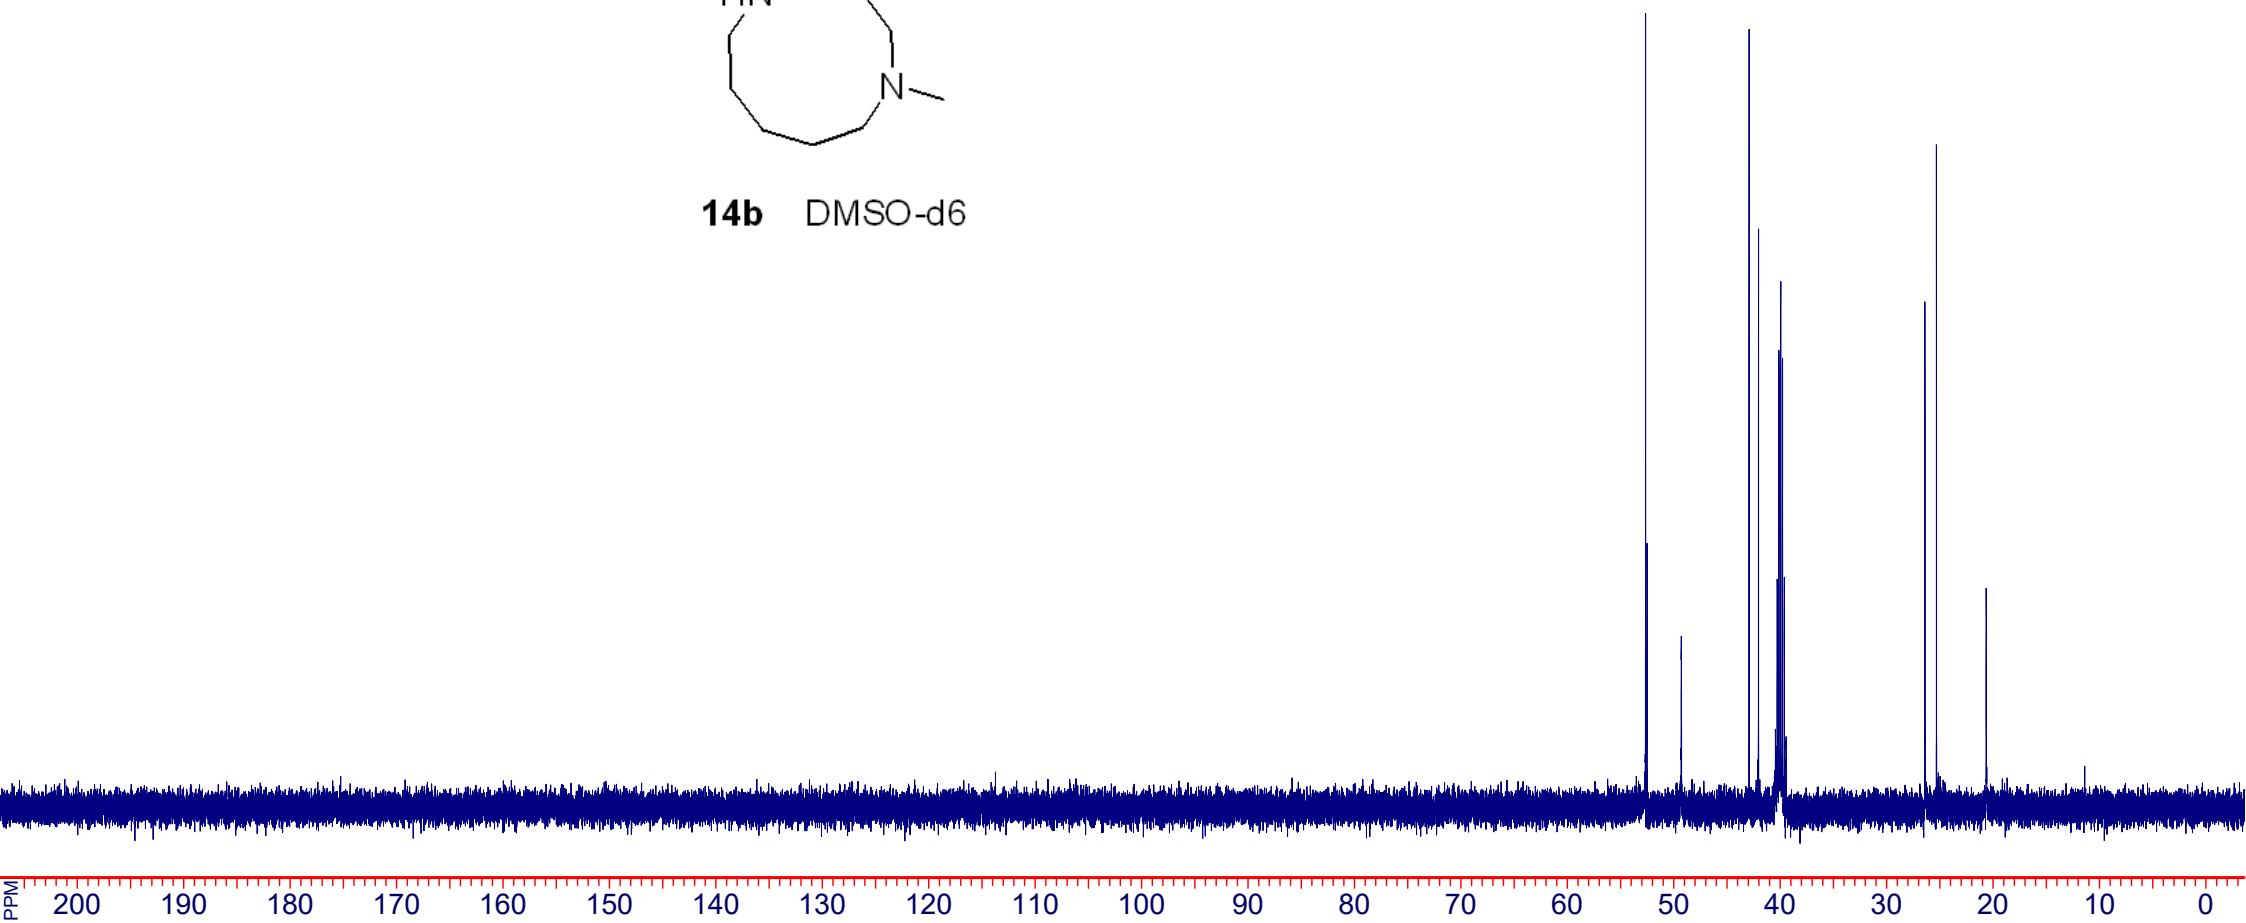

PPM 200 190 180 170 160 150 140 130 120 110 100 90 80 70 60 50 40 30 20 10 0

File name: lv-30\_C13.fid

Operator:

SF: 125.6926 MHz

NSC: 0

PW: 3.27 usec, RG: 60

SI: 65536

Date: 31-May-2022

Solvent: dms0

SW: 31250 Hz

TE: 298 K

AQ: 1.05 sec, RD: 0.00 sec

PPM

lv-30\_APTC13.fid

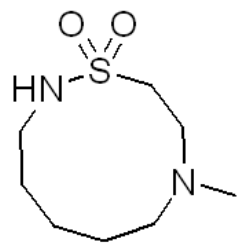**14b** DMSO-d652.65  
52.53  
49.32  
42.93  
42.05  
39.97  
26.42  
25.33  
20.68  
S122

PPM 190 180 170 160 150 140 130 120 110 100 90 80 70 60 50 40 30 20 10

File name: lv-30\_APTC13.fid

Operator:

SF: 125.6925 MHz

NSC: 0

PW: 5.00 usec, RG: 60

SI: 131072

Date: 31-May-2022

Solvent: dms0

SW: 32895 Hz

TE: 298 K

AQ: 1.95 sec, RD: 0.00 sec

Automated Probe tuning parameter

lv-31

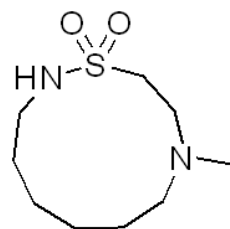**14c** DMSO-d6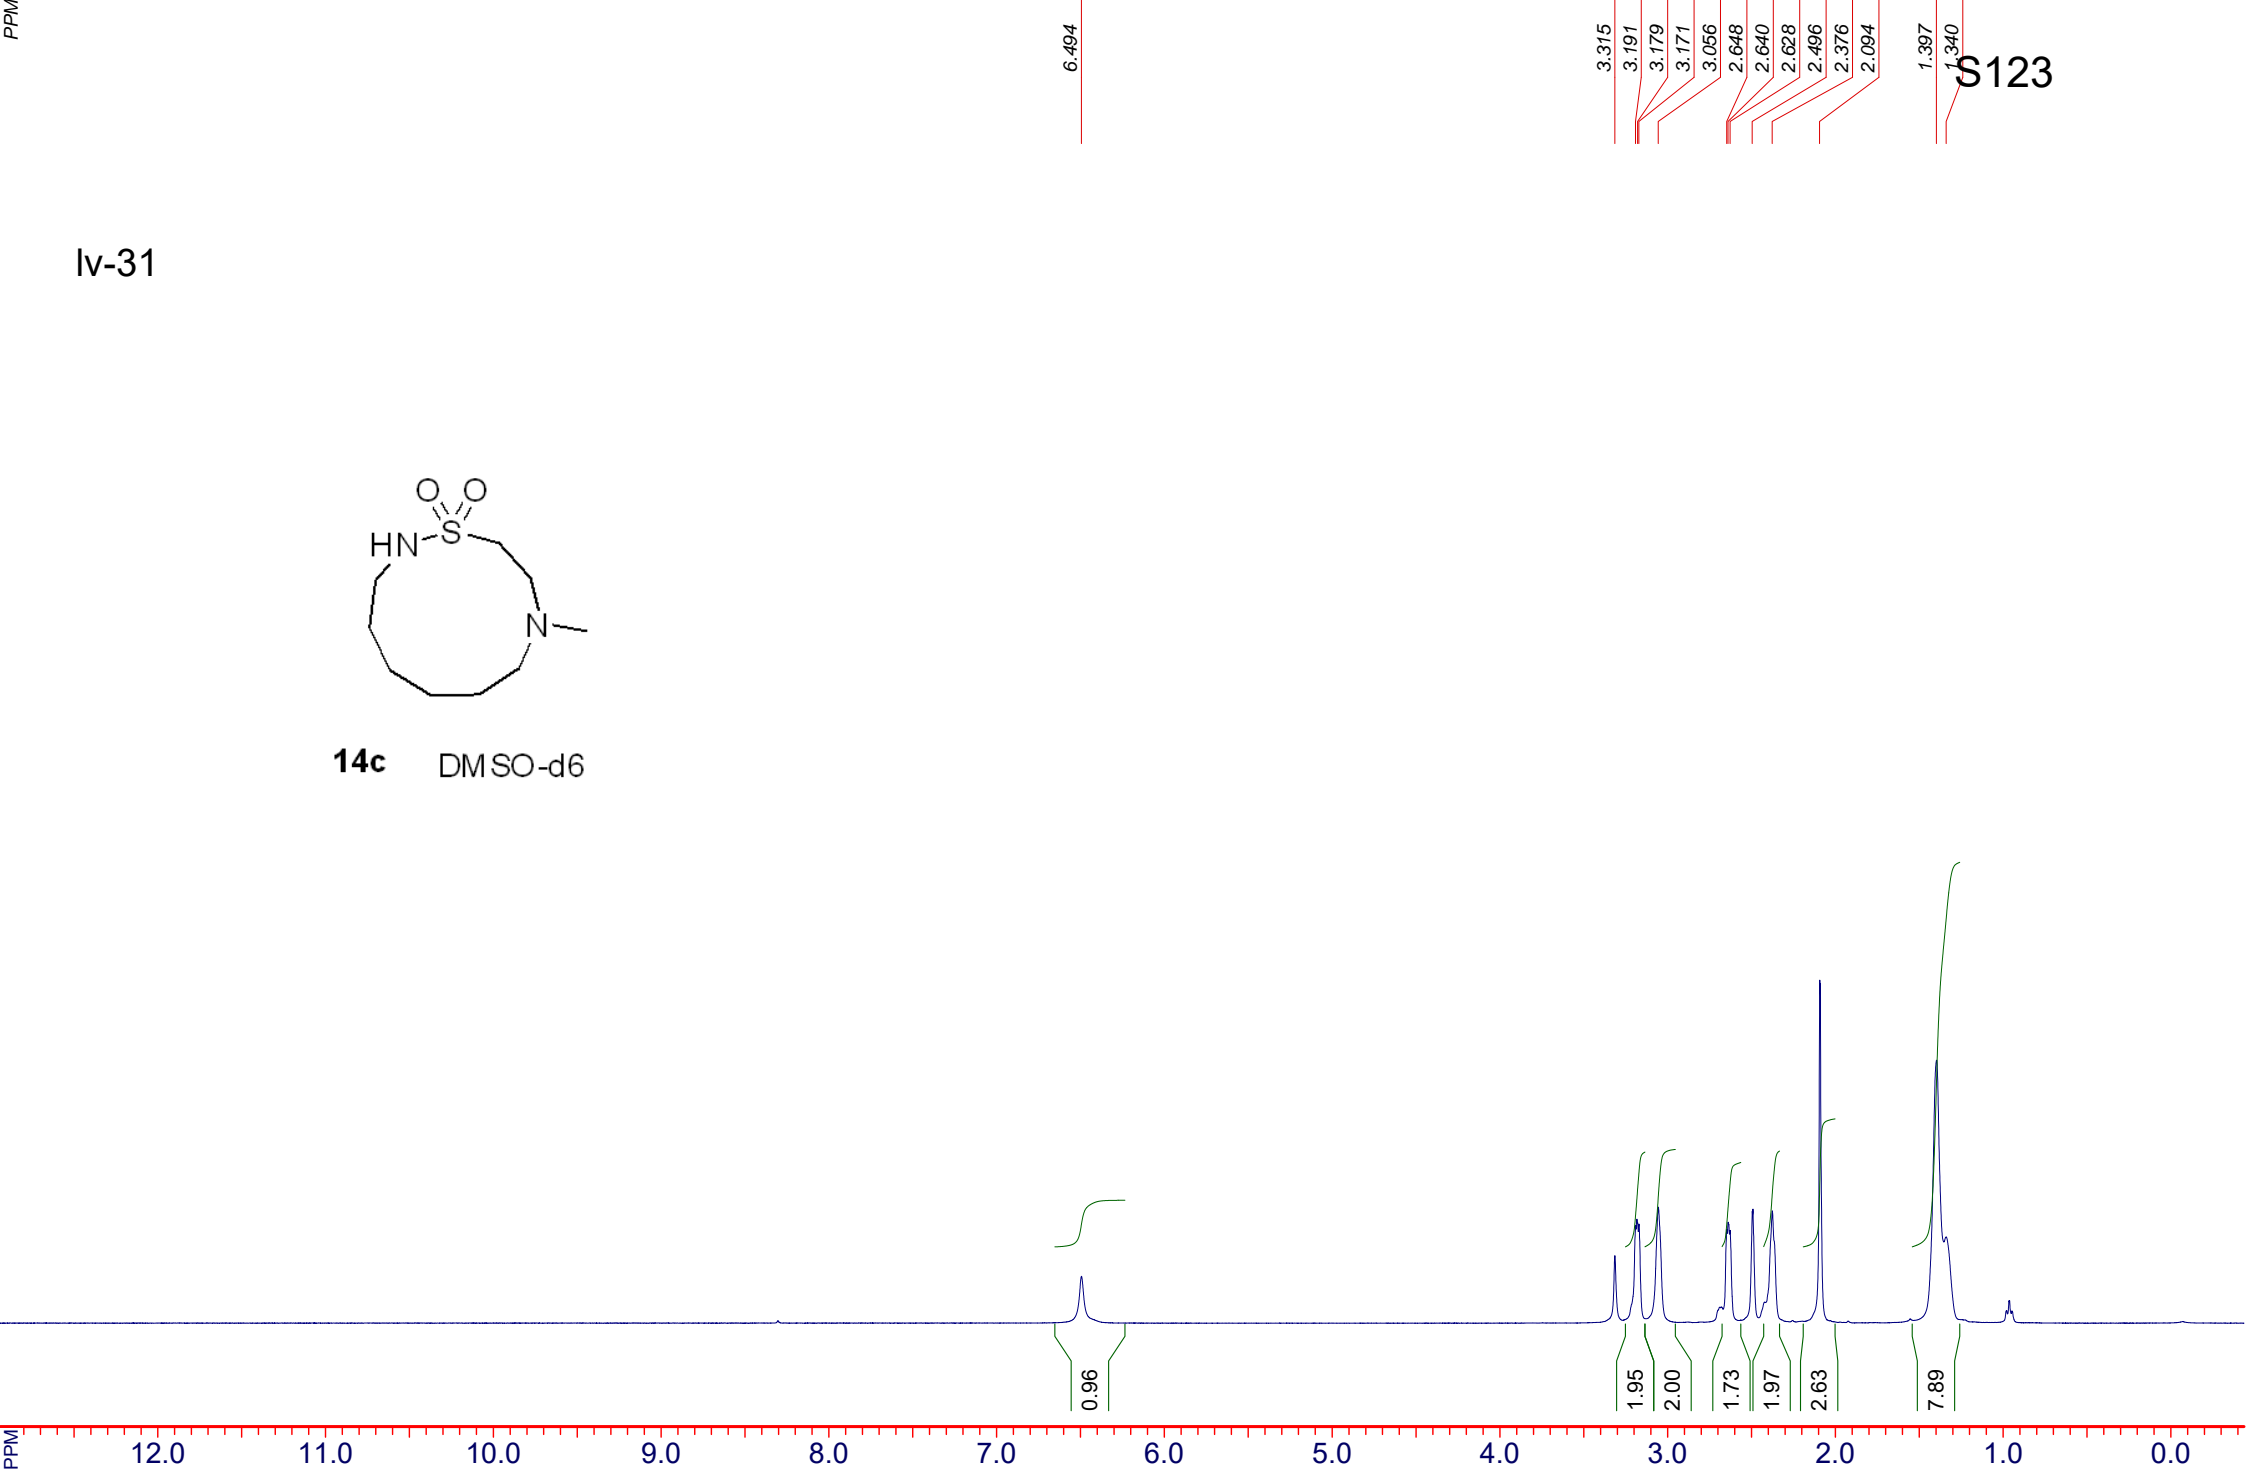

File name: lv-31

Operator: nmr

SF: 400.1300 MHz

NSC: 1

PW: 0.00 usec, RG: 25

SI: 32768

Date: 27-May-2022

Solvent: DMSO

SW: 8224 Hz

TE: 300 K

AQ: 1.99 sec, RD: 0.00 sec

53.67  
53.27  
50.26  
41.40  
39.98  
39.56  
26.67  
24.45  
22.31  
20.87  
S124

lv-31\_C13

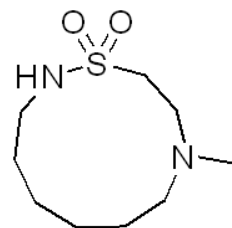

14c DMSO-d6

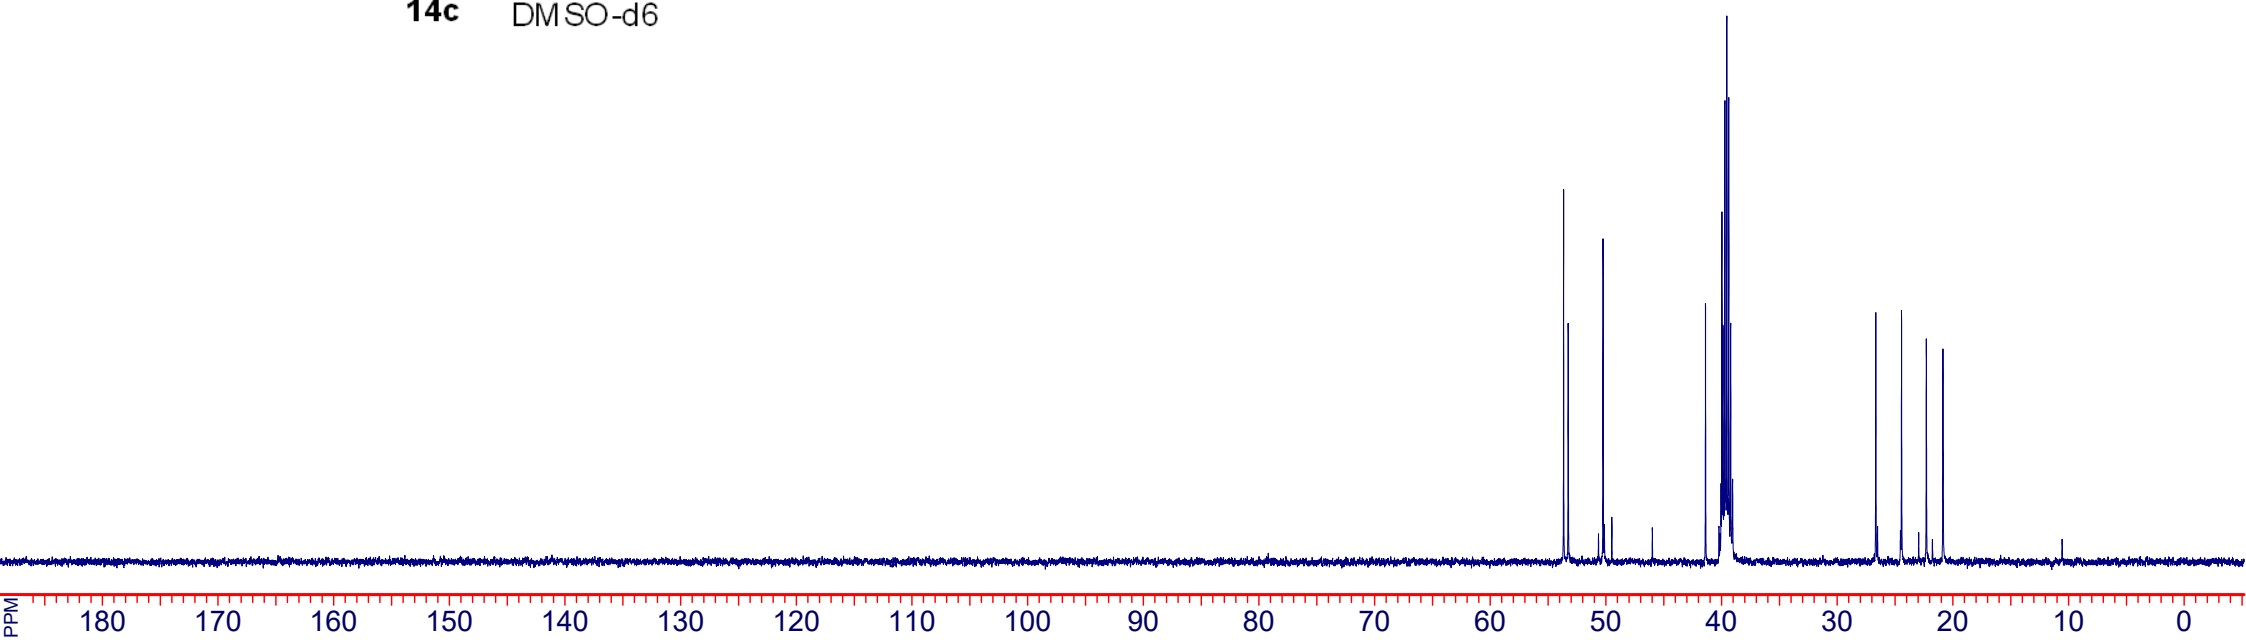

File name: lv-31\_C13

Operator: root

SF: 125.6681 MHz

NSC: 291

PW: 0.00 usec, RG: 51200

SI: 131072

Date: 28-May-2022

Solvent: DMSO

SW: 32680 Hz

TE: 683 K

AQ: 0.78 sec, RD: 0.00 sec

lv-31\_C13APT

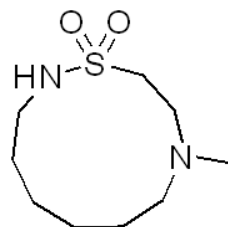**14c** DMSO-d6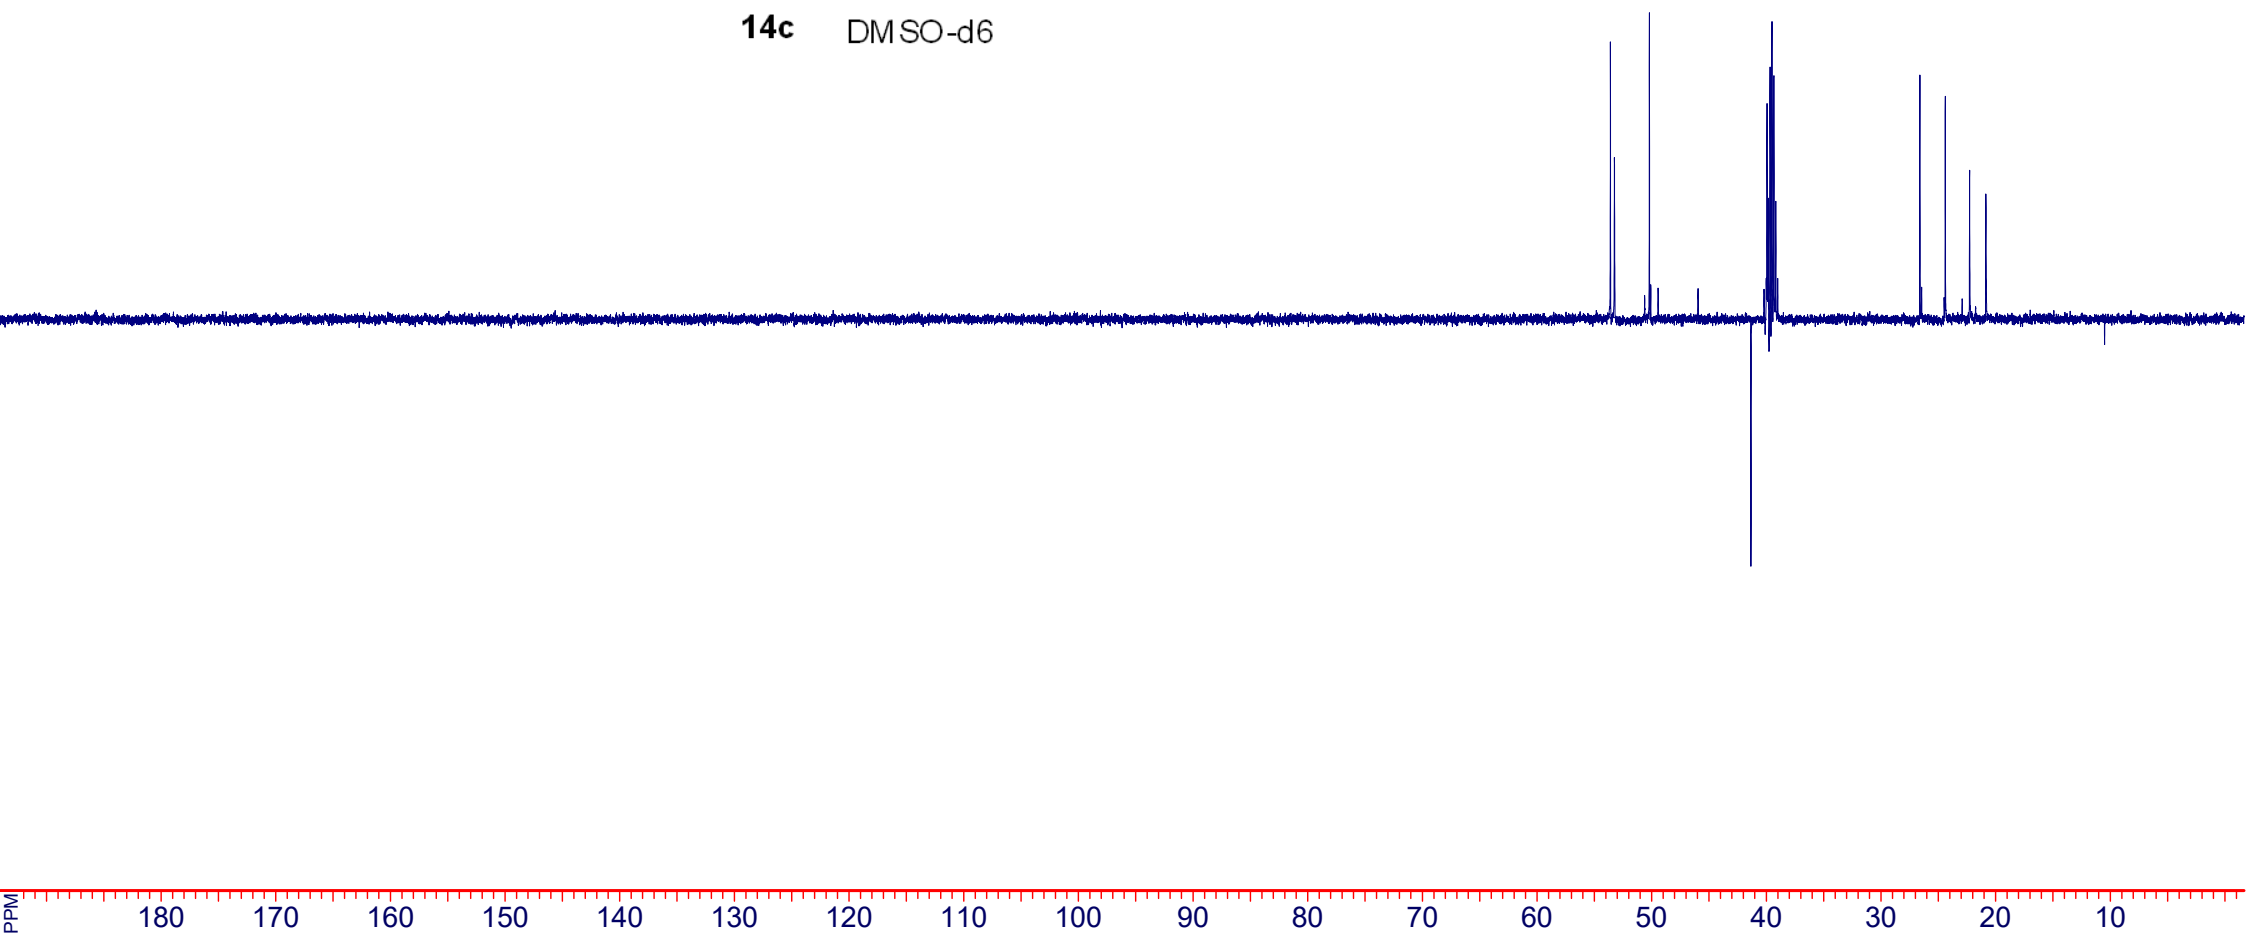53.61  
53.26  
50.2141.35  
39.95  
39.5226.62  
24.41  
23.28  
20.87

0.125

File name: lv-31\_C13APT

Operator: root

SF: 125.6681 MHz

NSC: 267

PW: 0.00 usec, RG: 51200

SI: 65536

Date: 28-May-2022

Solvent: DMSO

SW: 32680 Hz

TE: 683 K

AQ: 1.00 sec, RD: 0.00 sec

7.117

3.318

3.140

2.996

2.579

2.495

2.322

2.134

1.436

1.348

S126

lv-35

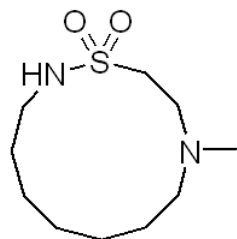**14d** DMSO-d6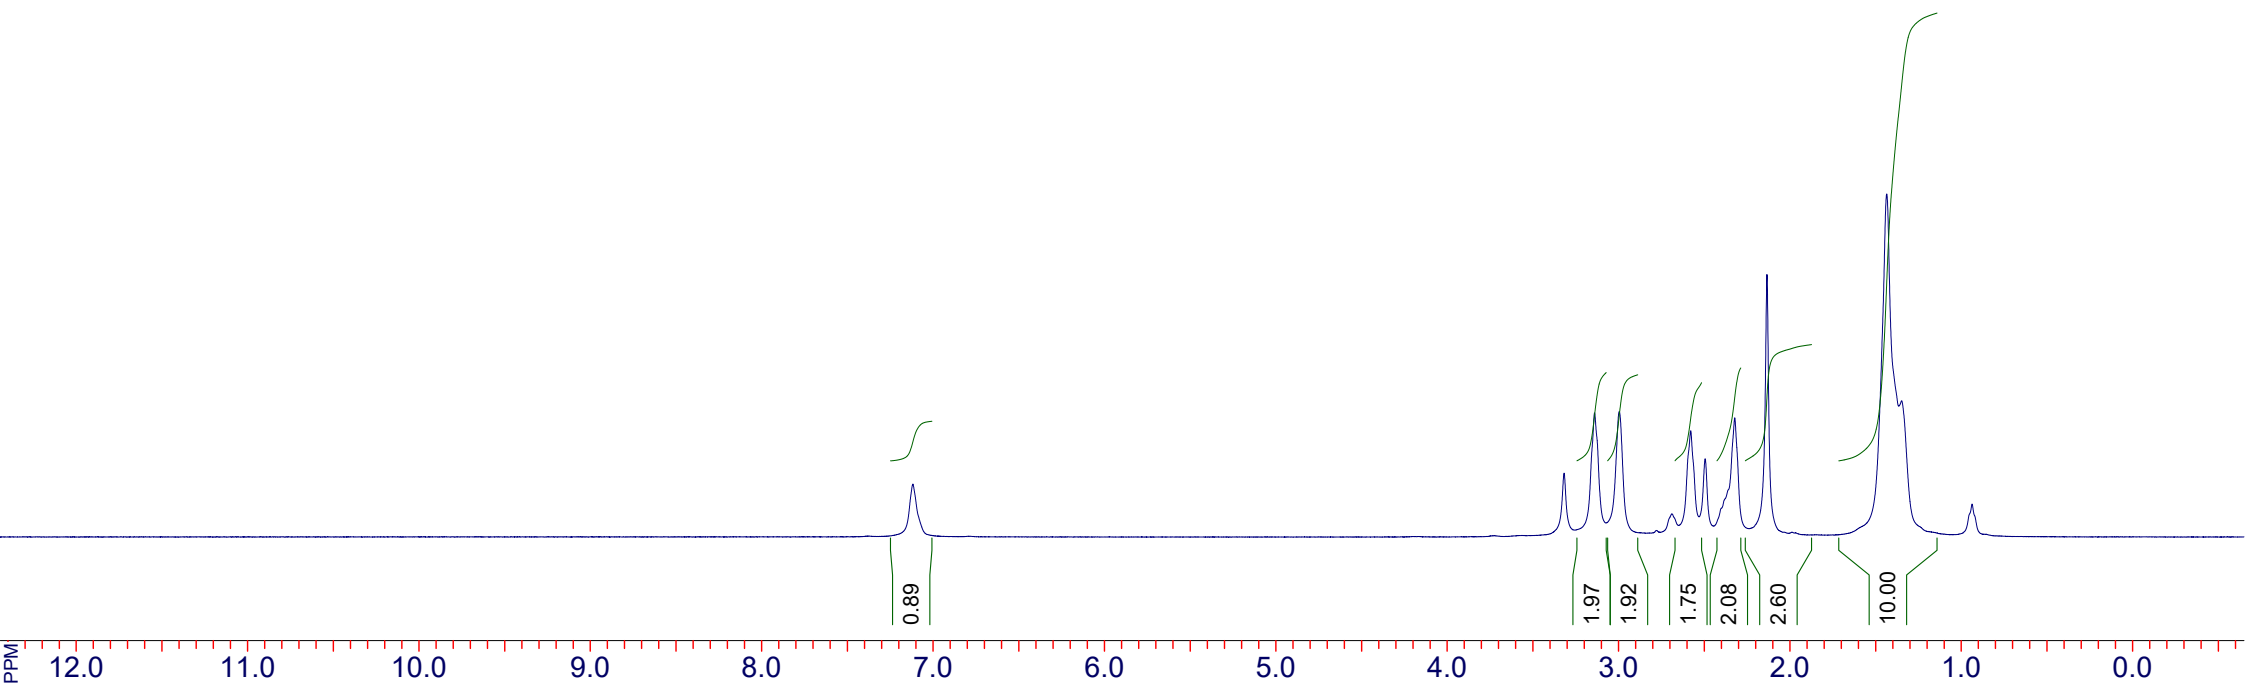

File name: lv-35\_hexane

Operator: nmr

SF: 400.1300 MHz

NSC: 1

PW: 0.00 usec, RG: 25

SI: 32768

Date: 03-Jun-2022

Solvent: DMSO

SW: 8224 Hz

TE: 300 K

AQ: 1.99 sec, RD: 0.00 sec

Parameter file, TOPSPINVersion 2.1



PPM

55.80  
50.53  
48.64  
43.58  
40.91  
40.01  
26.18  
24.57  
23.11  
22.80  
22.38  
S127

lv-35\_C13

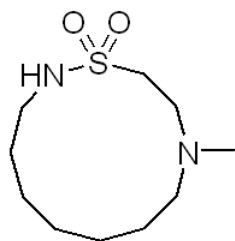**14d** DMSO-d6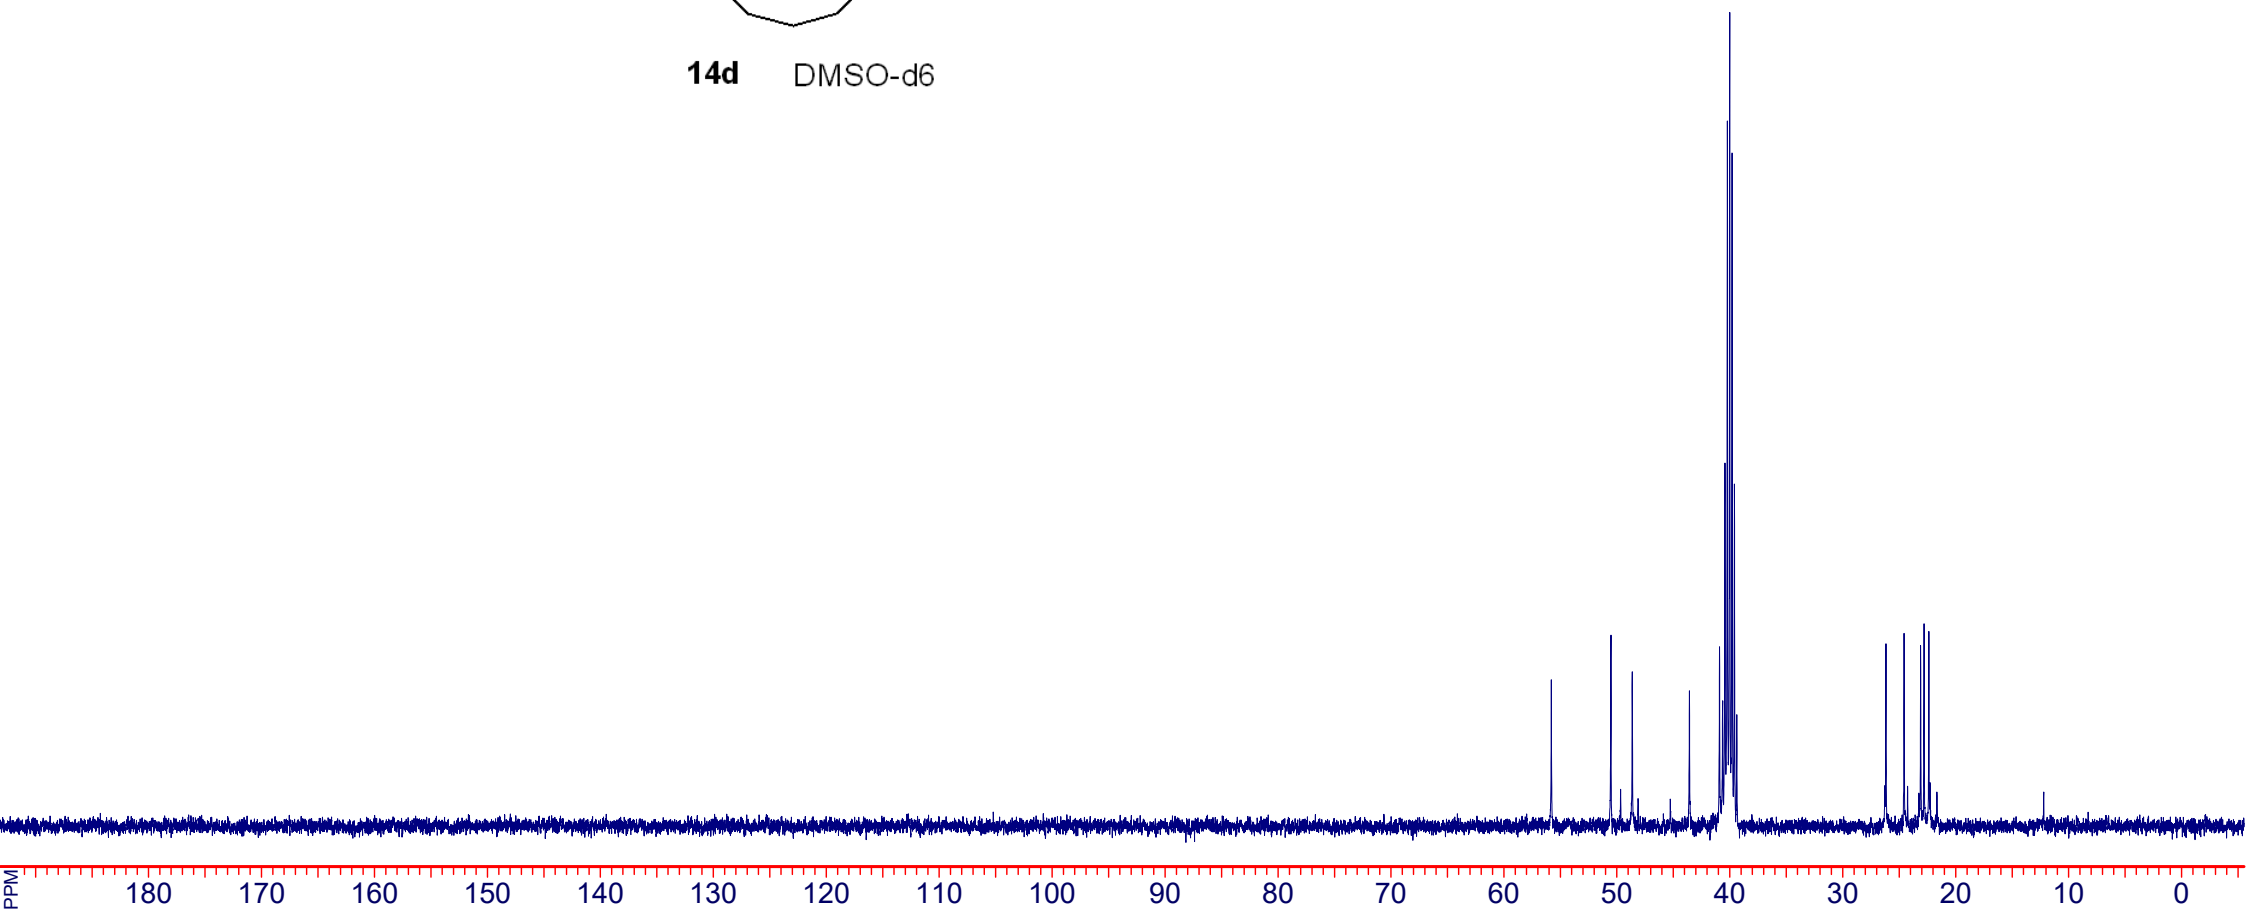

PPM

180 170 160 150 140 130 120 110 100 90 80 70 60 50 40 30 20 10 0

File name: lv-35\_C13\_hexane

Operator: nmr

SF: 100.6128 MHz

NSC: 297

PW: 0.00 usec, RG: 2050

SI: 32768

Date: 03-Jun-2022

Solvent: DMSO

SW: 26042 Hz

TE: 300 K

AQ: 0.98 sec, RD: 0.00 sec

Parameter file, TOPSPINVersion 2.1

PPM

lv-35\_C13APT.fid

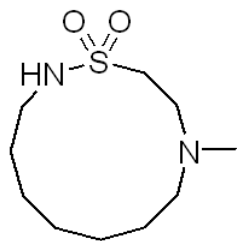**14d** DMSO-d6

55.74  
50.48  
48.68  
43.47  
40.84  
39.97  
26.12  
24.51  
23.08  
22.79  
22.37  
128

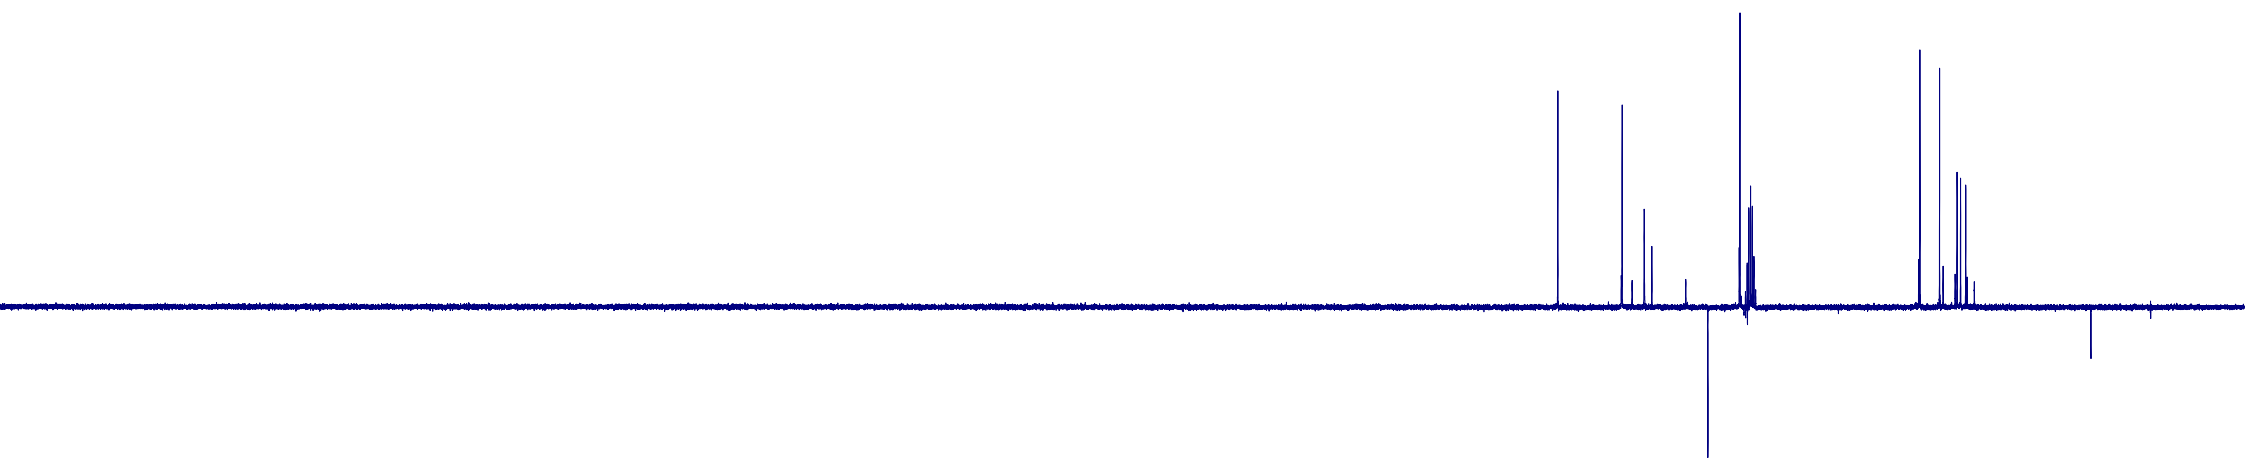

PPM

File name: lv-35\_C13APT.fid

Operator:

SF: 150.8333 MHz

NSC: 0

PW: 4.63 usec, RG: 60

SI: 131072

Date: 02-Jun-2022

Solvent: dms0

SW: 39063 Hz

TE: 298 K

AQ: 0.87 sec, RD: 0.00 sec

lv-32.fid

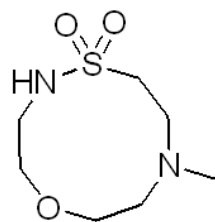**14e** DMSO-d6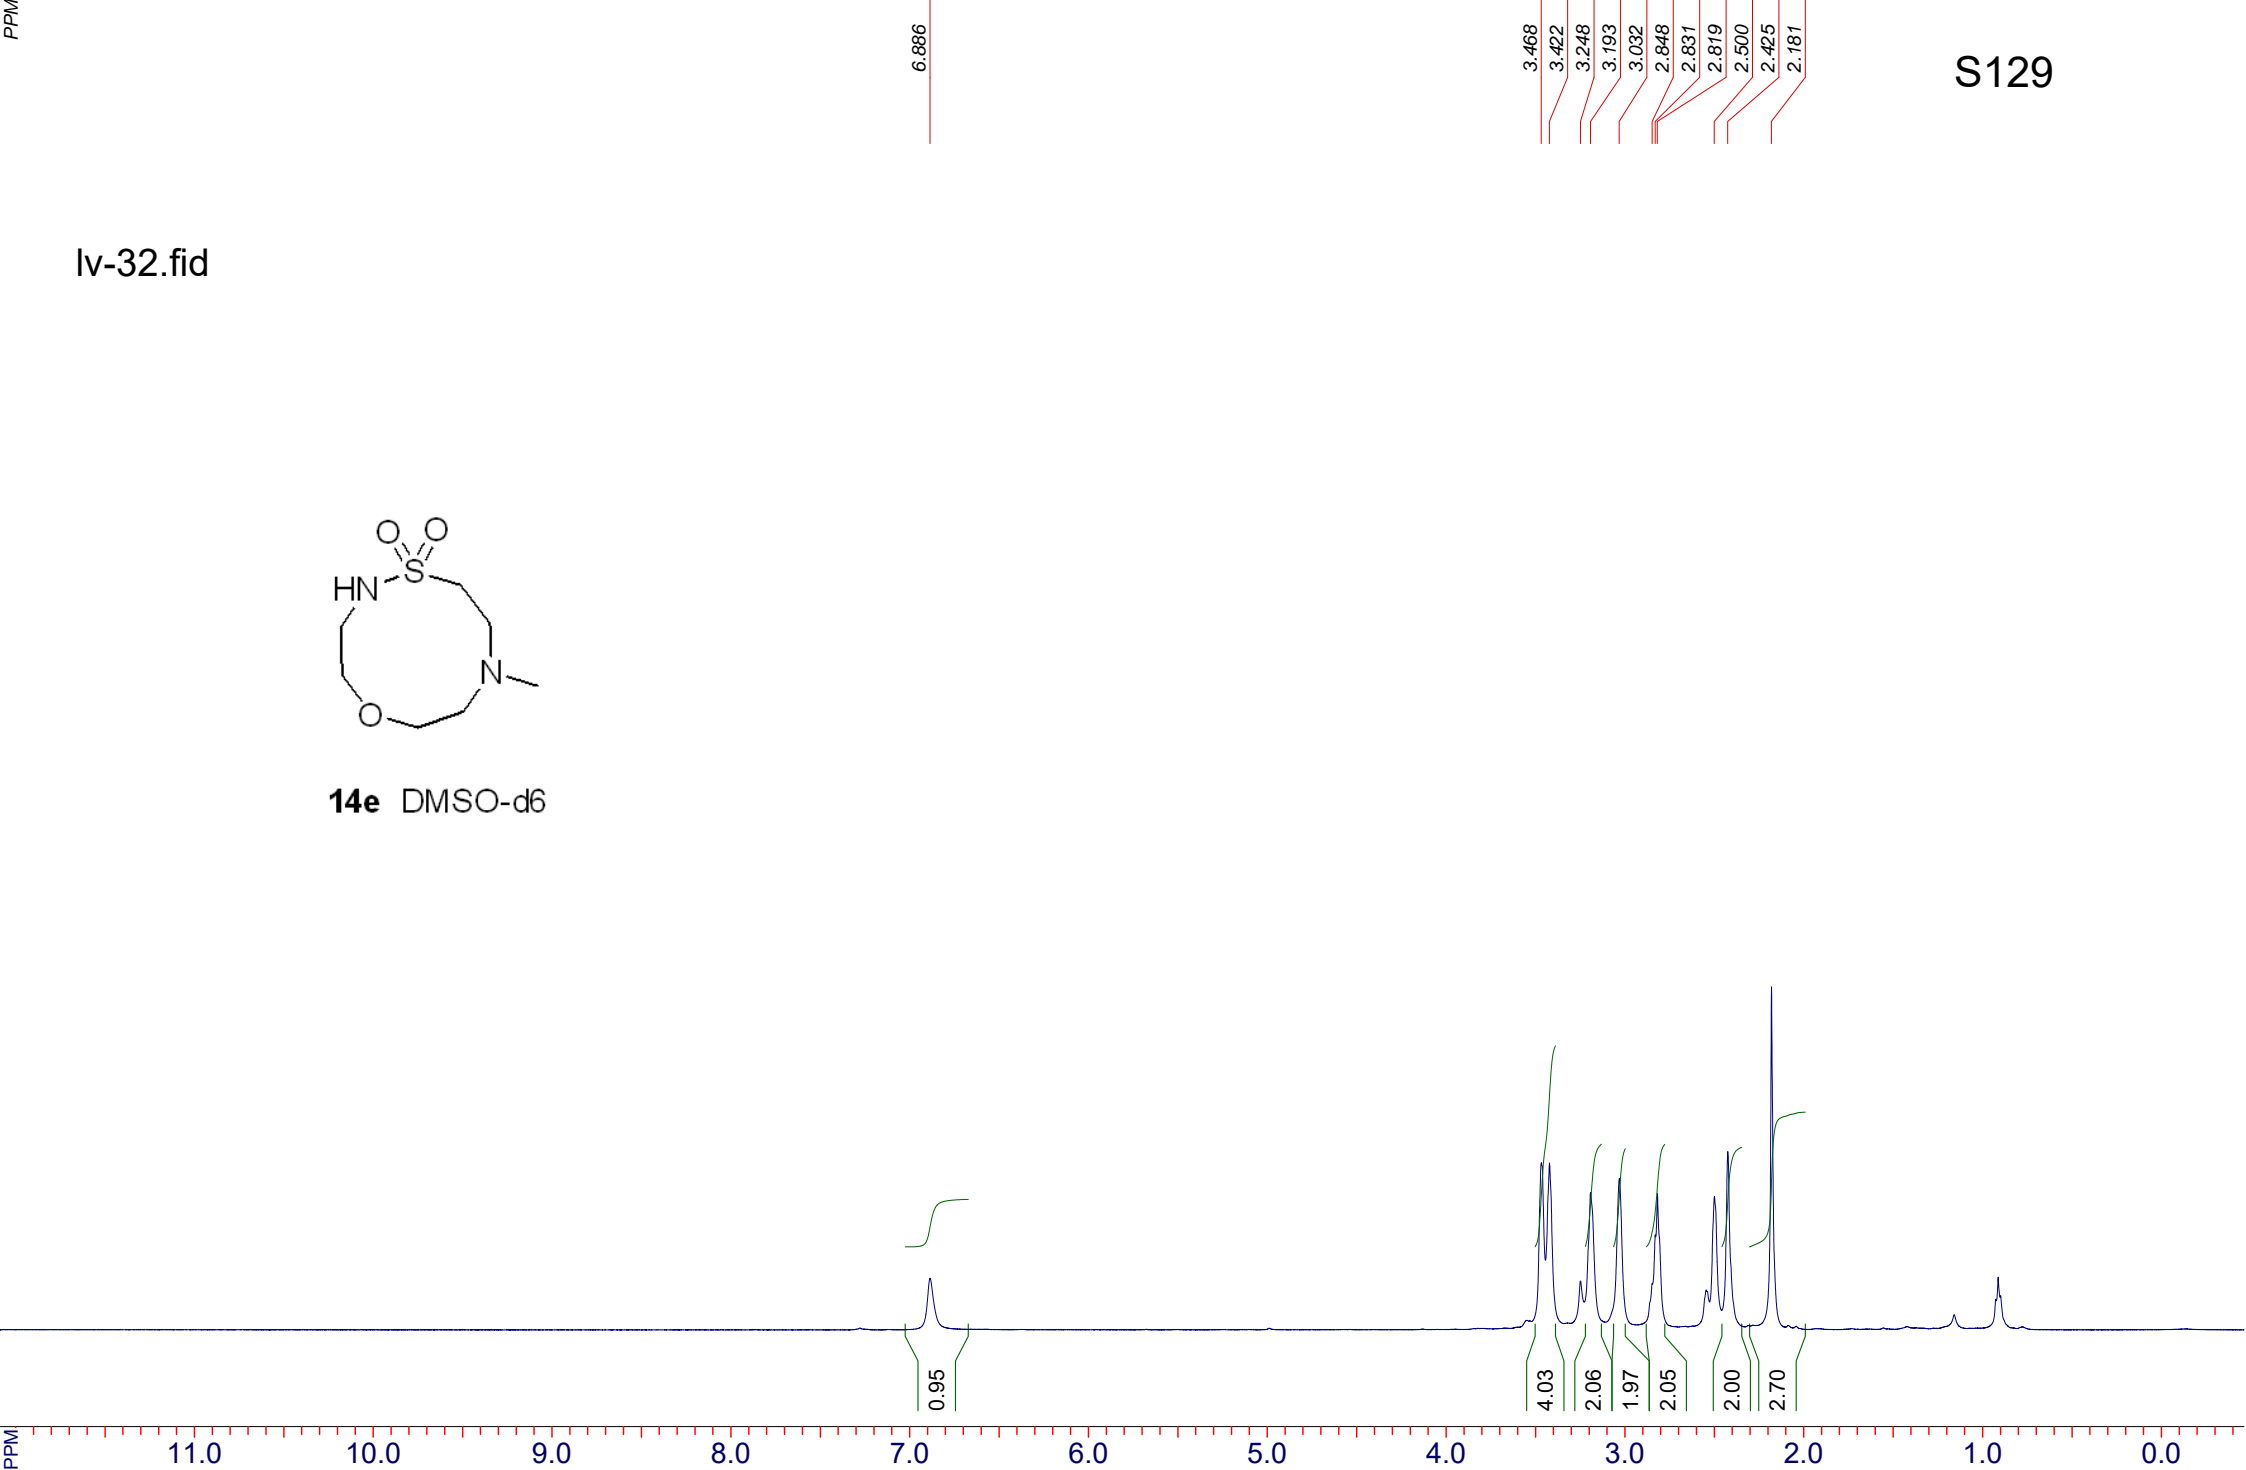

File name: lv-32.fid

Operator:

SF: 499.8203 MHz

NSC: 0

PW: 12.40 usec, RG: 12

SI: 32768

Date: 31-May-2022

Solvent: dms0

SW: 9328 Hz

TE: 298 K

AQ: 1.72 sec, RD: 0.00 sec

68.93  
68.5153.44  
50.09  
47.72  
43.40  
42.95  
39.56

S130

lv-32\_C13

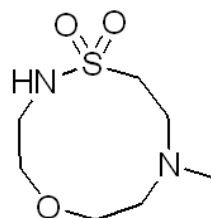**14e** DMSO-d6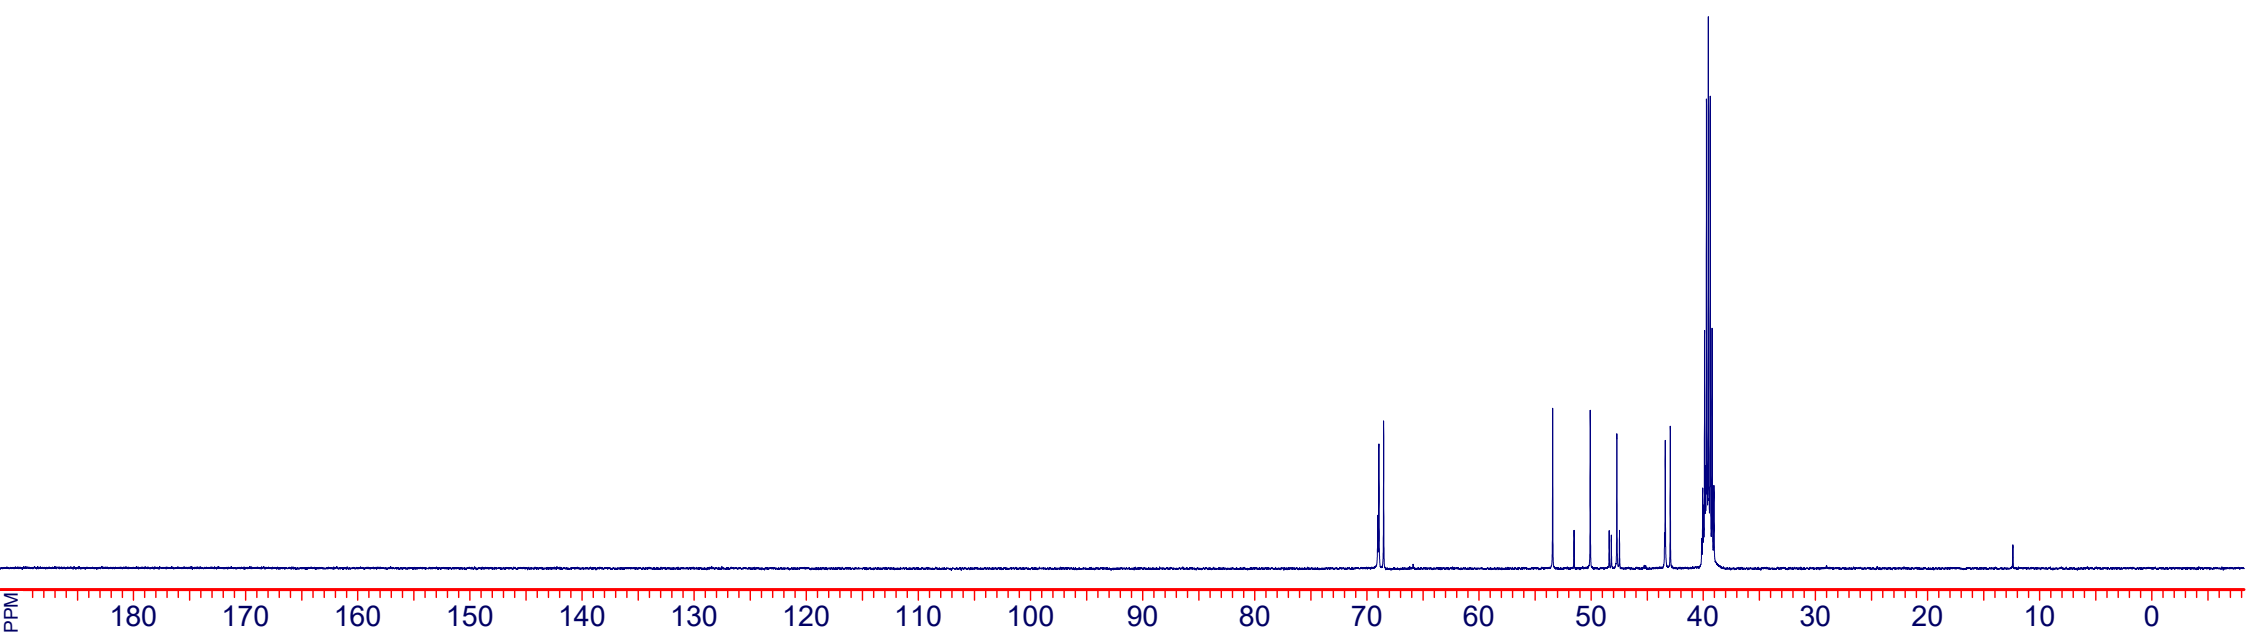

File name: lv-32\_C13\_C13APT

Operator: root

SF: 125.6681 MHz

NSC: 5120

PW: 0.00 usec, RG: 51200

SI: 131072

Date: 31-May-2022

Solvent: DMSO

SW: 32680 Hz

TE: 683 K

AQ: 0.78 sec, RD: 0.00 sec

68.87  
68.4653.42  
50.08

47.73

43.34  
42.90  
39.53

S131

lv-32\_C13\_C13APT

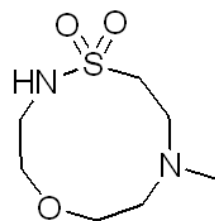**14e** DMSO-d6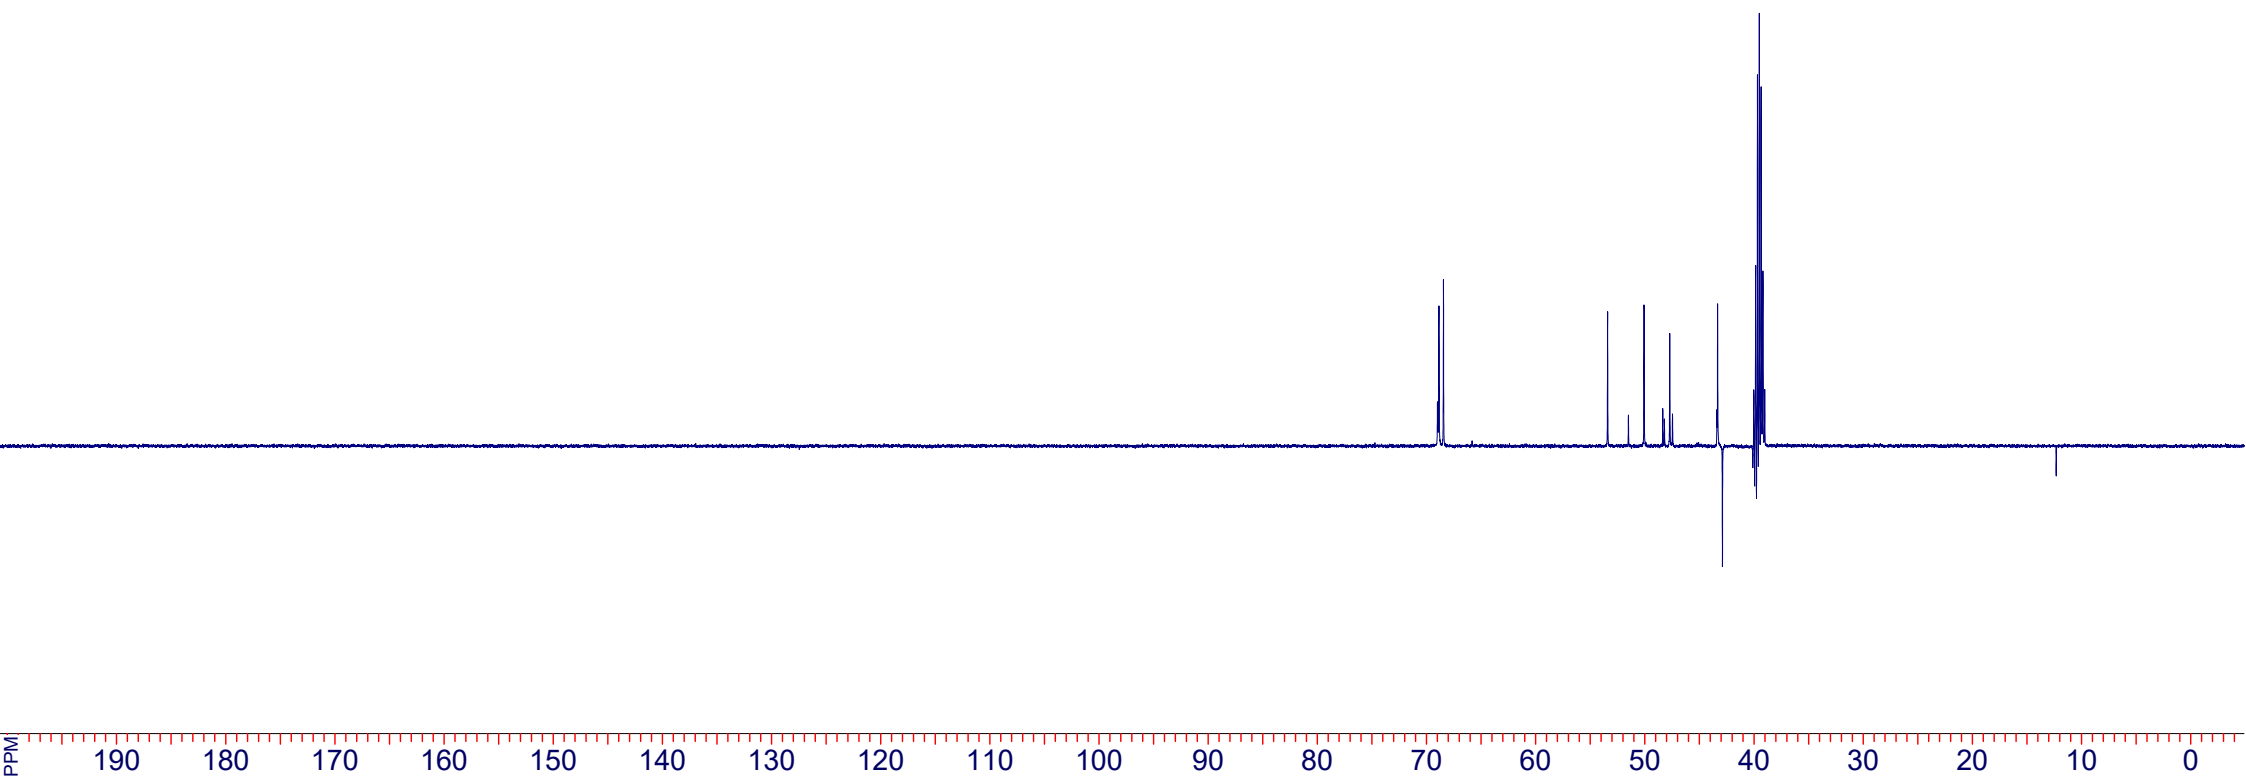

File name: lv-32\_C13\_C13APT

Operator: root

SF: 125.6681 MHz

NSC: 5120

PW: 0.00 usec, RG: 51200

SI: 65536

Date: 01-Jun-2022

Solvent: DMSO

SW: 32680 Hz

TE: 683 K

AQ: 1.57 sec, RD: 0.00 sec

7.007  
6.996  
6.9843.823  
3.814  
3.8083.324  
3.247  
3.238  
3.2283.185  
3.174  
3.162  
3.1512.793  
2.500  
2.392  
2.3822.371  
1.766  
1.754  
1.7431.733  
1.720

lv-41.fid

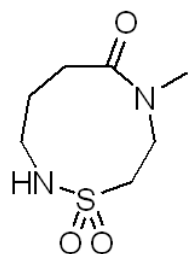

15 DMSO-d6

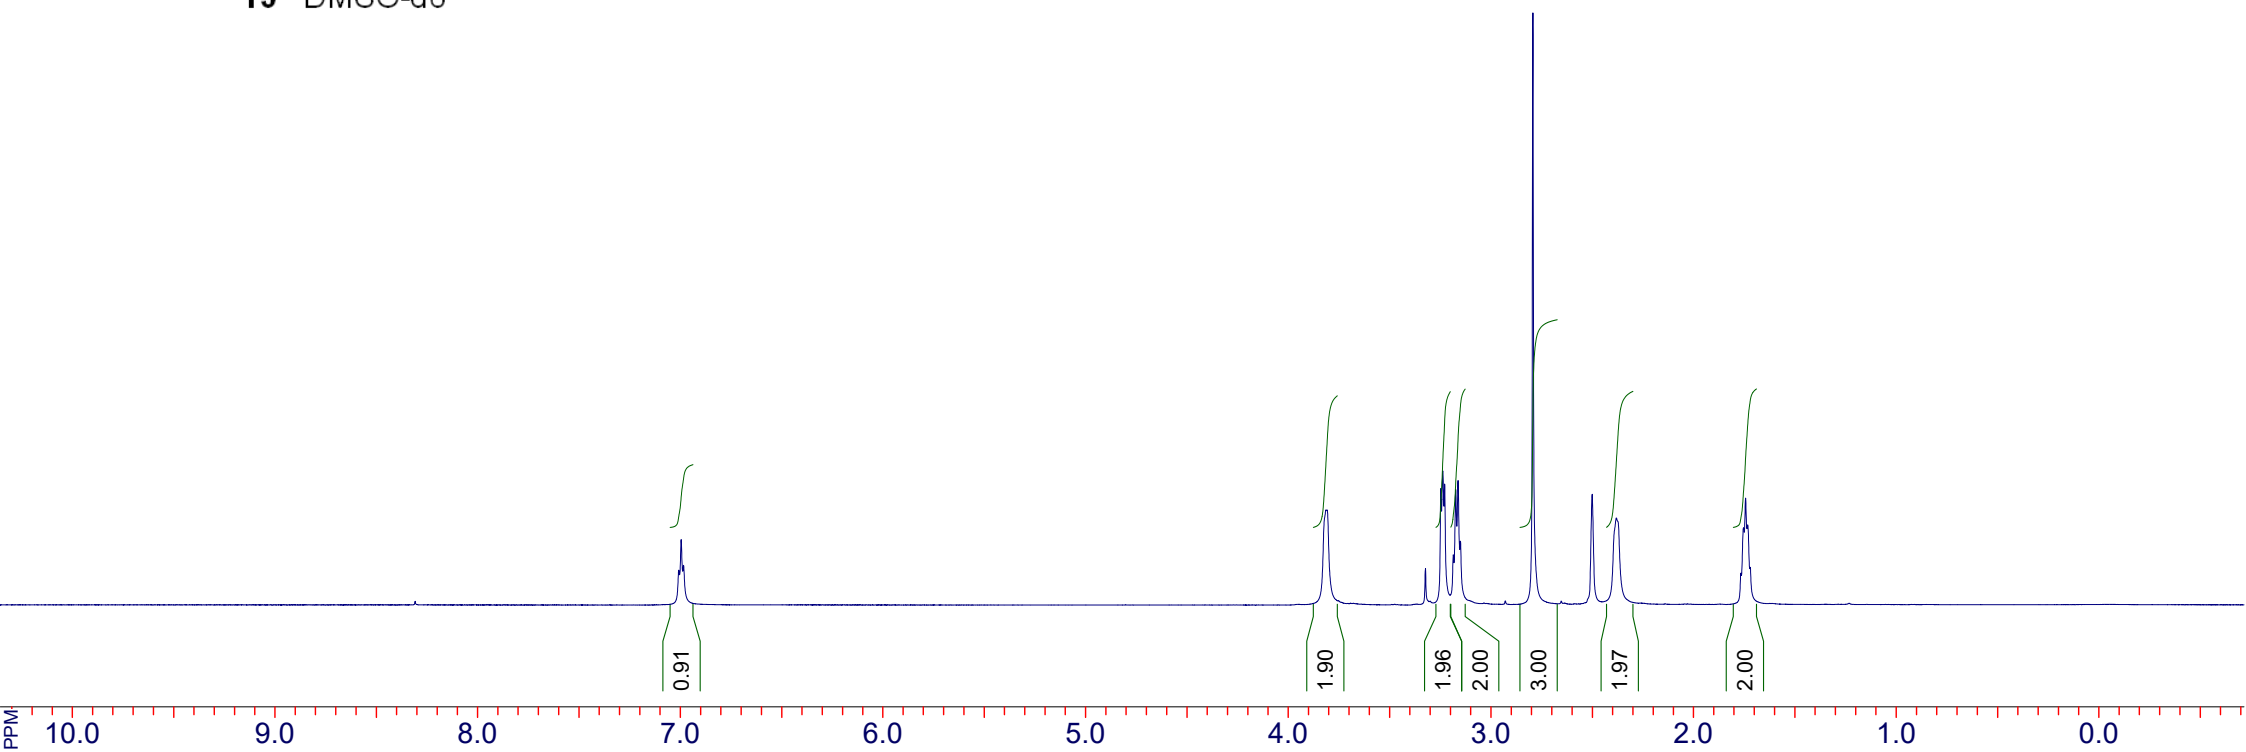

File name: lv-41.fid

Operator:

SF: 499.8203 MHz

NSC: 0

PW: 13.60 usec, RG: 12

SI: 32768

Date: 08-Jun-2022

Solvent: dms0

SW: 9328 Hz

TE: 298 K

AQ: 1.72 sec, RD: 0.00 sec

lv-41\_C13.fid

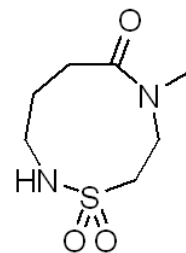**15** DMSO-d6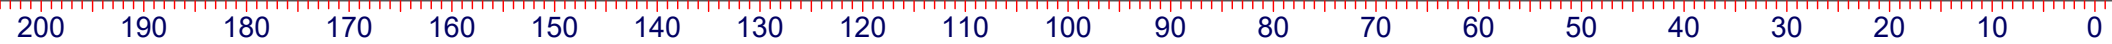

File name: lv-41\_C13.fid

Operator:

SF: 125.6926 MHz

NSC: 0

PW: 3.27 usec, RG: 60

SI: 65536

Date: 08-Jun-2022

Solvent: dms0

SW: 31250 Hz

TE: 298 K

AQ: 1.05 sec, RD: 0.00 sec

PPM

173.57

50.99

45.89

41.77

39.96

32.98

29.35

27.33

S134

lv-41\_APT.fid

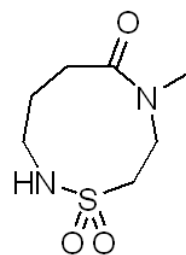

15 DMSO-d6

PPM 190 180 170 160 150 140 130 120 110 100 90 80 70 60 50 40 30 20 10 0

File name: lv-41\_APT.fid

Operator:

SF: 125.6925 MHz

NSC: 0

PW: 5.00 usec, RG: 60

SI: 131072

Date: 08-Jun-2022

Solvent: dms0

SW: 32895 Hz

TE: 298 K

AQ: 1.95 sec, RD: 0.00 sec

Automated Probe tuning parameter
